# Supplementary material for: Generation of a Mitochondrial Protein Compendium in Dictyostelium Discoideum
Source: Research Square preprint supplement (doi:10.21203/rs.3.rs-1054199/v1), 2021-11-17
Supplement: Supplementary file 1 [file 3eb4cc9ec22eceb58f799ec2.xlsx]

## Sheet: Table S1
Table S1. D. discoideum homologs of human mitochondrial proteins. Homology assessed by BlastP (expect < 0.001 and bit-score > 40) using the Human MitoCarta 3.0 as the query and the D. discoideum proteome as the subject. Presented alongside are N-terminal sequence predictions retrieved from TarpetP2 (mTP: mitochondrial targeting peptide; SP: signal peptide; OTHER: neither mTP nor SP).
Dicty Uniprot ID	Human homolog Uniprot ID	Dicty N-terminal Sequence Prediction	Human homolog N-terminal Sequence Prediction
B0G0Z7	P83111	SP	mTP
B0G143	Q5SVS4	SP	OTHER
B0G159	Q6KCM7	OTHER	OTHER
B0G189	Q8N442	mTP	mTP
C7FZZ8	Q9UG56	OTHER	mTP
C7G061	Q99797	OTHER	mTP
O21042	P00403	OTHER	OTHER
O21047	P03905	OTHER	OTHER
O21048	P03891	OTHER	OTHER
O21049	P00414	OTHER	OTHER
O76740	Q7KZN9	mTP	mTP
O97470	P12235	OTHER	OTHER
P0C8Z6	Q9NPE2	OTHER	mTP
P22237	O75489	OTHER	mTP
P34093	O00746	mTP	mTP
P36413	P10515	mTP	mTP
P36967	P53597	mTP	mTP
P54872	P54868	OTHER	mTP
Q1ZXF1	P30084	mTP	mTP
Q1ZXK7	Q8NBU5	OTHER	OTHER
Q1ZXN5	O43678	mTP	mTP
Q23883	O75306	OTHER	mTP
Q23884	Q9Y3B7	OTHER	mTP
Q23886	O15235	OTHER	mTP
Q23888	Q5T653	OTHER	mTP
Q34312	P28331	OTHER	mTP
Q34313	P03915	OTHER	OTHER
Q37311	P00156	OTHER	OTHER
Q37312	P03897	OTHER	OTHER
Q37313	P03886	OTHER	OTHER
Q37315	P48201	OTHER	mTP
Q4W6B5	P31930	OTHER	mTP
Q54B20	Q9NX18	mTP	mTP
Q54B26	Q96EH3	OTHER	mTP
Q54B68	O43837	mTP	mTP
Q54BF6	Q00325	OTHER	mTP
Q54BM3	O43772	OTHER	OTHER
Q54C45	Q16595	mTP	mTP
Q54C70	P08559	mTP	mTP
Q54CE4	Q9NSE4	mTP	mTP
Q54CG9	O75414	OTHER	OTHER
Q54CK4	P82933	OTHER	mTP
Q54CL5	Q5SXM8	OTHER	mTP
Q54CL7	Q4J6C6	mTP	OTHER
Q54CQ1	Q8WV93	OTHER	mTP
Q54CT8	P27144	OTHER	OTHER
Q54CV4	Q8N5M1	mTP	mTP
Q54CX6	P31937	mTP	mTP
Q54CZ2	Q9Y3A0	OTHER	mTP
Q54CZ9	Q9BU61	OTHER	mTP
Q54D04	P40926	mTP	mTP
Q54D07	P08574	mTP	mTP
Q54D65	Q9Y305	OTHER	mTP
Q54D88	Q9H300	OTHER	mTP
Q54DD3	Q9UL12	OTHER	mTP
Q54DF1	P36542	OTHER	mTP
Q54DF5	Q9NQE9	SP	OTHER
Q54DG1	P51648	OTHER	OTHER
Q54DG6	Q9H7H0	OTHER	mTP
Q54DK1	Q9Y6N5	SP	mTP
Q54DT8	P50336	OTHER	OTHER
Q54DU1	Q86VD7	OTHER	OTHER
Q54DX7	Q16635	OTHER	OTHER
Q54DY9	Q9Y276	OTHER	OTHER
Q54E22	O14561	mTP	mTP
Q54E48	Q330K2	mTP	mTP
Q54EN1	Q9Y2Z9	mTP	mTP
Q54ET5	Q15031	mTP	mTP
Q54EW4	Q9H4B0	OTHER	OTHER
Q54EW8	P09622	mTP	mTP
Q54F10	P19404	mTP	mTP
Q54F15	Q8TB37	OTHER	mTP
Q54F42	P56556	OTHER	OTHER
Q54F93	P22695	mTP	mTP
Q54F95	P27105	OTHER	OTHER
Q54FD7	P13804	OTHER	mTP
Q54FE6	Q9Y619	OTHER	OTHER
Q54FN9	Q9HD34	OTHER	OTHER
Q54FU9	Q9Y6C9	OTHER	OTHER
Q54G09	Q96ND0	mTP	mTP
Q54G88	Q9H2W6	mTP	mTP
Q54GC2	A8MXV4	OTHER	OTHER
Q54GI9	P35232	SP	OTHER
Q54GJ7	Q8IWW8	OTHER	mTP
Q54GK8	O95822	OTHER	mTP
Q54HB2	P49411	mTP	mTP
Q54HD3	Q4G176	OTHER	mTP
Q54HG5	A6NFY7	mTP	OTHER
Q54HG7	Q13825	OTHER	mTP
Q54HM6	Q9Y6N1	OTHER	mTP
Q54HN7	Q96E52	OTHER	mTP
Q54HW4	Q9Y2Z2	OTHER	mTP
Q54I10	Q02252	mTP	mTP
Q54I58	O75323	mTP	mTP
Q54I61	P09001	OTHER	mTP
Q54I63	O75648	mTP	OTHER
Q54I90	P49821	OTHER	mTP
Q54IA0	Q49B96	OTHER	OTHER
Q54IA8	P22830	OTHER	mTP
Q54ID0	Q14061	OTHER	OTHER
Q54IF0	Q7Z2W9	mTP	mTP
Q54IH6	Q8NI60	OTHER	OTHER
Q54II4	Q8WWV3	OTHER	mTP
Q54IM8	P11310	mTP	mTP
Q54IP6	O75616	OTHER	mTP
Q54IQ2	O76031	OTHER	OTHER
Q54IY2	O75828	OTHER	OTHER
Q54J68	P61604	OTHER	OTHER
Q54J94	Q96RR1	mTP	mTP
Q54J97	P10809	mTP	mTP
Q54JB6	Q5VT66	OTHER	OTHER
Q54JC1	Q9HBH1	OTHER	SP
Q54JD9	P55809	mTP	mTP
Q54JE4	Q02218	mTP	mTP
Q54JK6	Q9NWS8	mTP	mTP
Q54JS1	Q8IYU8	mTP	mTP
Q54JV7	O75127	mTP	OTHER
Q54JV8	P23434	mTP	mTP
Q54JW0	Q5TEU4	mTP	mTP
Q54K35	Q99595	OTHER	OTHER
Q54K70	Q14249	SP	mTP
Q54KB7	P00367	mTP	mTP
Q54KE6	Q96RQ3	OTHER	mTP
Q54KG7	P22570	OTHER	mTP
Q54KM7	P23378	mTP	mTP
Q54KV4	Q96SZ6	OTHER	mTP
Q54KY1	Q9Y234	mTP	OTHER
Q54KY9	Q9BSH5	OTHER	OTHER
Q54L63	Q9H0R6	OTHER	OTHER
Q54LT0	Q8NE86	mTP	mTP
Q54LV3	P43897	mTP	mTP
Q54M22	P12694	OTHER	mTP
Q54M56	Q8WVM0	OTHER	OTHER
Q54M82	P14927	OTHER	OTHER
Q54M86	P60602	OTHER	OTHER
Q54MV7	Q9UI09	OTHER	OTHER
Q54MZ4	Q9HC21	OTHER	OTHER
Q54MZ7	Q9UMS0	mTP	mTP
Q54MZ8	Q96GW9	mTP	mTP
Q54N28	Q6P087	OTHER	OTHER
Q54N47	O15382	mTP	mTP
Q54NC1	P00387	SP	SP
Q54NI6	O75251	OTHER	mTP
Q54NM6	Q9NZB8	OTHER	mTP
Q54NQ9	Q9H9B4	OTHER	OTHER
Q54NR3	Q9Y6M9	OTHER	OTHER
Q54NS1	Q5T440	OTHER	mTP
Q54NW1	Q9H6K4	OTHER	OTHER
Q54NW9	P47985	mTP	mTP
Q54NX3	Q99757	mTP	mTP
Q54NZ0	P62072	OTHER	OTHER
Q54NZ8	Q96AB3	OTHER	OTHER
Q54P00	Q3MIX3	OTHER	mTP
Q54P11	Q15070	mTP	mTP
Q54P40	Q86U28	mTP	mTP
Q54P95	P14854	OTHER	OTHER
Q54PL1	Q92506	mTP	OTHER
Q54PP3	Q9P015	mTP	OTHER
Q54PT4	A6NJ78	OTHER	OTHER
Q54PT6	Q6IPR1	OTHER	OTHER
Q54PV9	Q9NVH1	OTHER	OTHER
Q54PX1	Q9UQ90	OTHER	mTP
Q54PY7	Q02978	OTHER	OTHER
Q54Q31	Q99623	OTHER	OTHER
Q54Q74	Q8N0X4	mTP	mTP
Q54QC1	P43304	OTHER	OTHER
Q54QF9	Q9HAV7	mTP	mTP
Q54QH6	Q9HD33	mTP	mTP
Q54QI7	P35914	OTHER	mTP
Q54QJ9	Q9UIJ7	OTHER	OTHER
Q54QM0	Q9Y584	OTHER	OTHER
Q54QM2	Q9BYD2	mTP	mTP
Q54QN1	Q9Y5T4	OTHER	OTHER
Q54QN2	Q9H2D1	OTHER	OTHER
Q54R47	Q92947	mTP	mTP
Q54RA8	P48047	mTP	mTP
Q54RB5	Q9BYD3	mTP	mTP
Q54RB6	Q8N983	OTHER	OTHER
Q54RB9	O75746	mTP	OTHER
Q54RE7	Q9UGC7	mTP	mTP
Q54RP1	Q96T52	OTHER	OTHER
Q54RP2	Q9H1K1	mTP	mTP
Q54RR5	P16219	OTHER	mTP
Q54RR6	Q8N0Z8	OTHER	OTHER
Q54S83	Q7L592	mTP	mTP
Q54S91	Q8NE22	OTHER	OTHER
Q54SE2	P30041	mTP	OTHER
Q54SV6	Q9Y3D7	mTP	mTP
Q54T46	Q9NQH7	OTHER	mTP
Q54T58	O43325	OTHER	OTHER
Q54T75	P86397	OTHER	mTP
Q54TK2	P51398	mTP	mTP
Q54TR2	Q8NC60	OTHER	mTP
Q54TR3	Q13084	OTHER	mTP
Q54TR5	Q86TW2	OTHER	SP
Q54TR7	P11182	mTP	mTP
Q54TT7	O75880	OTHER	mTP
Q54TY5	Q9NRX2	OTHER	mTP
Q54U71	Q96H96	OTHER	mTP
Q54UH1	O43464	OTHER	mTP
Q54UQ6	Q8IWL3	OTHER	mTP
Q54UT2	O95299	mTP	mTP
Q54UX3	P13196	OTHER	OTHER
Q54V61	P17568	OTHER	OTHER
Q54V76	O14949	OTHER	OTHER
Q54V95	Q86Y79	OTHER	OTHER
Q54VA2	P07954	OTHER	mTP
Q54VB3	Q99807	OTHER	mTP
Q54VB8	P40939	mTP	mTP
Q54VE8	Q9HA92	OTHER	OTHER
Q54VG0	Q96HY7	mTP	mTP
Q54VJ9	Q86YH6	OTHER	mTP
Q54VN2	Q5HYK3	mTP	mTP
Q54VS1	Q9BUE6	OTHER	mTP
Q54VU7	Q6UB28	OTHER	mTP
Q54VX4	Q96H78	OTHER	OTHER
Q54W11	Q8N8R3	OTHER	OTHER
Q54W18	Q9NRG7	SP	OTHER
Q54W24	Q9NUT2	OTHER	mTP
Q54W51	Q96EY8	OTHER	mTP
Q54W88	P28330	mTP	mTP
Q54WD9	Q9Y2Z4	mTP	mTP
Q54WP3	Q9NWU5	mTP	mTP
Q54X04	Q9Y697	mTP	mTP
Q54XD0	Q9NZJ6	OTHER	mTP
Q54XH7	Q8N3R3	mTP	mTP
Q54XK0	Q9P0M9	mTP	mTP
Q54XM6	Q16134	mTP	mTP
Q54XQ3	Q8IYB8	OTHER	mTP
Q54XR6	Q96EY1	OTHER	mTP
Q54XS2	Q99798	mTP	mTP
Q54XX9	P39210	OTHER	mTP
Q54Y17	Q6P1Q0	OTHER	mTP
Q54Y25	Q5VUM1	OTHER	mTP
Q54Y48	Q8NFV4	OTHER	mTP
Q54YT4	Q9BV79	mTP	mTP
Q54YU4	Q9NVH0	OTHER	OTHER
Q54YV4	P36776	OTHER	mTP
Q54YX7	O75394	OTHER	mTP
Q54YZ4	P38117	OTHER	OTHER
Q54Z02	Q96CQ1	OTHER	OTHER
Q54Z70	Q9H4K7	OTHER	mTP
Q54ZD0	Q9Y3E5	OTHER	OTHER
Q54ZW4	Q96DP5	mTP	mTP
Q550P4	Q96BW9	mTP	OTHER
Q551W4	Q6NUN0	OTHER	mTP
Q552K6	Q9Y375	OTHER	mTP
Q552L9	Q9BZJ4	OTHER	OTHER
Q552W5	P53701	OTHER	OTHER
Q553K8	Q9HD23	OTHER	OTHER
Q553N4	P46199	mTP	OTHER
Q553S7	P05165	mTP	mTP
Q553V1	O75390	mTP	mTP
Q553V2	Q96PE7	mTP	mTP
Q554C4	Q9NWU1	OTHER	mTP
Q554U7	Q9BYD1	OTHER	OTHER
Q554Z5	Q9H6R3	mTP	OTHER
Q556J9	Q15526	OTHER	mTP
Q556V1	Q96MF6	OTHER	OTHER
Q556W7	Q9BYC9	OTHER	OTHER
Q557J5	Q86X76	OTHER	mTP
Q559Z0	Q16795	mTP	mTP
Q559Z4	Q16718	OTHER	OTHER
Q55AI5	Q9P2R7	mTP	mTP
Q55BA6	Q8IVH4	OTHER	OTHER
Q55BF4	Q3KQZ1	OTHER	SP
Q55BI2	P50213	mTP	mTP
Q55BJ9	P04179	OTHER	mTP
Q55BQ4	Q86WU2	OTHER	OTHER
Q55C52	Q969Y2	OTHER	mTP
Q55C99	Q6PI48	OTHER	mTP
Q55CA5	Q9Y6H3	OTHER	OTHER
Q55CC2	P21912	mTP	mTP
Q55CS9	P06576	mTP	mTP
Q55CV9	Q9HAC7	OTHER	mTP
Q55CY6	Q5JTJ3	OTHER	OTHER
Q55D72	Q9Y3D5	mTP	mTP
Q55DJ4	Q96A35	OTHER	mTP
Q55DQ6	Q8IVS2	OTHER	mTP
Q55DT8	Q9BYV1	OTHER	mTP
Q55DY8	Q9NYZ2	OTHER	OTHER
Q55E52	Q8N465	mTP	mTP
Q55E82	Q8N4T8	OTHER	OTHER
Q55E85	Q6ZT89	OTHER	OTHER
Q55E94	Q96RP9	mTP	mTP
Q55EC5	Q9NVA1	mTP	mTP
Q55ER6	Q9BT17	OTHER	mTP
Q55ER8	O75879	OTHER	mTP
Q55F21	P00505	mTP	mTP
Q55F30	Q13423	mTP	mTP
Q55F42	P30049	mTP	mTP
Q55FH5	P82930	OTHER	OTHER
Q55FI1	P80404	mTP	mTP
Q55FI3	Q96I59	OTHER	mTP
Q55FL0	Q9Y6I8	OTHER	OTHER
Q55FN7	P21953	mTP	mTP
Q55G45	Q8IXI1	OTHER	OTHER
Q55G83	Q7Z695	OTHER	OTHER
Q55G90	Q96E11	mTP	mTP
Q55G92	Q969S9	mTP	mTP
Q55GD7	Q9NZ45	OTHER	OTHER
Q55GE2	Q9H1U9	OTHER	OTHER
Q55GI5	Q9H9P8	OTHER	mTP
Q55GM6	Q9NP81	OTHER	mTP
Q55GR1	O75380	mTP	mTP
Q55GS6	Q6NVY1	OTHER	OTHER
Q55GU4	P0DKB6	SP	OTHER
Q55GV8	Q96TA2	OTHER	OTHER
Q55GW1	P10109	OTHER	mTP
Q75JK6	P56381	OTHER	mTP
Q75JK9	Q7L3T8	mTP	OTHER
Q75JQ5	P55789	OTHER	OTHER
Q75JR2	P48735	mTP	mTP
Q75JS8	Q9Y4W6	OTHER	mTP
Q75K07	Q9BWH2	OTHER	OTHER
Q75K12	Q86UY8	OTHER	mTP
Q76NT0	Q6IN84	OTHER	mTP
Q7KWX2	Q32NB8	mTP	mTP
Q869N1	P99999	OTHER	OTHER
Q869S7	Q96I99	OTHER	mTP
Q869Y7	P36957	mTP	mTP
Q869Z3	Q5JPH6	OTHER	mTP
Q869Z4	Q16822	mTP	mTP
Q86A68	O95363	OTHER	mTP
Q86A90	Q9UGM6	OTHER	OTHER
Q86AD9	P24752	mTP	mTP
Q86AV5	P53007	OTHER	OTHER
Q86H28	O43272	OTHER	OTHER
Q86H49	Q9NRP4	OTHER	OTHER
Q86HS0	O75208	mTP	mTP
Q86HT3	Q53S33	OTHER	mTP
Q86HX0	P11177	mTP	mTP
Q86I71	Q9GZT3	OTHER	mTP
Q86JL2	Q14197	mTP	mTP
Q86K57	O00217	mTP	mTP
Q86KA1	P52815	mTP	mTP
Q86L04	Q12931	mTP	mTP
Q86L22	O43169	OTHER	OTHER
Q8I0H7	P38646	mTP	mTP
Q8MP58	Q5JRX3	OTHER	mTP
Q8MYE6	Q969Z3	OTHER	OTHER
Q8T131	P05166	mTP	mTP
Q8T1V6	O43181	mTP	mTP
Q8T2J9	Q9HCC0	mTP	mTP
Q8T2T5	Q99643	mTP	mTP
Q8T9W2	O75027	OTHER	mTP
Q95NZ8	O00411	OTHER	mTP
Q9GPS1	Q5U5X0	OTHER	OTHER
Q9GRX6	O95831	mTP	mTP
Q9NKW1	P51659	OTHER	OTHER
Q9U3X4	P31040	mTP	mTP
Q9XPJ9	P25705	OTHER	mTP
B0G0Y8	O00408	OTHER	OTHER
B0G139	Q9Y2S7	OTHER	mTP
B0G160	Q8NE62	SP	mTP
C7G023	Q08J23	OTHER	OTHER
C7G056	Q9P0S9	OTHER	OTHER
O00909	P84085	OTHER	OTHER
O15743	Q9P0J1	OTHER	OTHER
O15744	Q6IAN0	OTHER	OTHER
O15818	Q6DKK2	OTHER	mTP
O21035*	O60783	OTHER	mTP
O77229	P04040	OTHER	OTHER
P10819	O43865	OTHER	OTHER
P20054	P31327	OTHER	mTP
P22887	Q13232	OTHER	SP
P34099	P17612	OTHER	OTHER
P51173	P27695	OTHER	OTHER
P53766	P13051	OTHER	OTHER
P54644	Q9BXM7	OTHER	mTP
P83401	P49419	OTHER	mTP
Q1ZXA4	P05108	SP	mTP
Q1ZXF2	P06746	OTHER	OTHER
Q1ZXI6	O94903	OTHER	mTP
Q1ZXI7	Q02318	SP	mTP
Q1ZXJ1	Q86UT6	OTHER	OTHER
Q1ZXP7	Q9UIF7	OTHER	OTHER
Q23921	Q9BX68	OTHER	mTP
Q27559	P00846	OTHER	OTHER
Q54BF3	Q96GK7	OTHER	mTP
Q54BI7	Q9HBH5	OTHER	mTP
Q54BM2	Q96DU9	OTHER	OTHER
Q54BP2	O14832	OTHER	mTP
Q54BP5	Q8N9F0	OTHER	OTHER
Q54BQ2	Q96Q11	OTHER	mTP
Q54BU4	Q9NRK6	OTHER	OTHER
Q54BV1	Q8WYQ3	OTHER	OTHER
Q54BW5	P33316	OTHER	mTP
Q54BX7	O75521	OTHER	mTP
Q54C42	Q96GJ1	OTHER	mTP
Q54CT5	P34913	OTHER	OTHER
Q54CY5	Q05932	OTHER	mTP
Q54CZ3	O15527	OTHER	OTHER
Q54D73	Q96HP4	OTHER	mTP
Q54DD2	Q9BYT8	OTHER	mTP
Q54DM3	O94761	OTHER	OTHER
Q54DN0	Q6YN16	OTHER	mTP
Q54DN5	O94925	OTHER	mTP
Q54DP1	Q9UBQ7	OTHER	OTHER
Q54DT2	P19099	SP	mTP
Q54E29	Q9NWX6	OTHER	OTHER
Q54E40	Q16762	mTP	OTHER
Q54E41	Q9NYQ3	OTHER	OTHER
Q54E51	Q9BXR0	OTHER	OTHER
Q54ED3	Q9NX36	OTHER	OTHER
Q54EG2	Q9H3H1	OTHER	mTP
Q54EG3	P82912	OTHER	mTP
Q54EI4	Q02338	OTHER	mTP
Q54EJ5	O95571	OTHER	mTP
Q54EV3	Q9H078	OTHER	mTP
Q54EX5	O15270	OTHER	OTHER
Q54EY7	Q9HC38	OTHER	OTHER
Q54F12	Q8IXQ9	OTHER	mTP
Q54F32	Q9Y3D2	OTHER	mTP
Q54FA0	Q9Y606	OTHER	mTP
Q54FJ9	Q8IW45	OTHER	SP
Q54FR4	Q2QL34	OTHER	OTHER
Q54FR8	Q9BQ52	OTHER	mTP
Q54FY1	Q3SY69	OTHER	mTP
Q54FY2	P05091	OTHER	mTP
Q54FY3	P49189	OTHER	OTHER
Q54G07	Q8N945	OTHER	OTHER
Q54G24	Q9NUJ1	OTHER	mTP
Q54G51	Q9BZ23	OTHER	OTHER
Q54G53	Q6UB35	OTHER	mTP
Q54GB2	Q3ZCQ8	OTHER	mTP
Q54GE6	Q9BYZ2	OTHER	mTP
Q54GN2	P23919	OTHER	OTHER
Q54GP3	P35270	OTHER	OTHER
Q54GP8	Q9NS18	OTHER	mTP
Q54GT6	P21549	OTHER	OTHER
Q54GU2	Q12849	OTHER	mTP
Q54GU6	Q9NRY6	OTHER	OTHER
Q54H86	O96011	OTHER	OTHER
Q54HH3	Q6L8Q7	OTHER	OTHER
Q54HX1	Q9NPJ3	OTHER	OTHER
Q54I12	Q9HCL2	OTHER	OTHER
Q54I50	Q9BUV8	OTHER	OTHER
Q54IA7	P36551	OTHER	mTP
Q54ID7	Q9BXW6	OTHER	OTHER
Q54IH4	Q96T66	OTHER	OTHER
Q54IJ0	A6NK06	OTHER	OTHER
Q54IP0	O94826	OTHER	OTHER
Q54IT3	P27338	OTHER	OTHER
Q54IT8	Q9NRZ5	OTHER	OTHER
Q54J08	Q13085	OTHER	OTHER
Q54J66	Q9BW92	OTHER	mTP
Q54JB3	Q12887	OTHER	OTHER
Q54JM9	Q9NQR4	mTP	OTHER
Q54JP5	P04181	OTHER	mTP
Q54JQ2	P14735	OTHER	mTP
Q54K00	Q8N5Z0	OTHER	mTP
Q54K63	P22033	OTHER	mTP
Q54KL1	O43715	OTHER	OTHER
Q54KM6	Q6YP21	mTP	mTP
Q54KR1	Q9HA77	OTHER	mTP
Q54LB8	Q5THJ4	OTHER	OTHER
Q54M29	Q9H4I8	OTHER	OTHER
Q54MG7	Q99497	OTHER	OTHER
Q54MJ7	Q8TD30	mTP	mTP
Q54MR1	Q16775	OTHER	mTP
Q54N08	Q13686	OTHER	OTHER
Q54N39	Q13057	OTHER	mTP
Q54N76	P30044	OTHER	mTP
Q54N86	Q9NQZ5	OTHER	mTP
Q54NR2	O43488	OTHER	mTP
Q54NS8	Q9BRQ8	OTHER	OTHER
Q54NY5	Q8NBN7	SP	SP
Q54NZ7	O60218	OTHER	OTHER
Q54P64	Q9UDR5	OTHER	mTP
Q54P79	Q96CM8	OTHER	mTP
Q54PF9	P41250	mTP	mTP
Q54PG3	Q9NXH9	OTHER	mTP
Q54PR9	Q9NPH0	SP	mTP
Q54PT2	Q9NVI7	OTHER	OTHER
Q54PV1	Q96I51	OTHER	mTP
Q54PV8	Q9H2U2	OTHER	mTP
Q54QC3	Q9BXW7	OTHER	mTP
Q54QC7	O60260	OTHER	OTHER
Q54QE4	P22234	OTHER	OTHER
Q54QE5	Q8N3J5	OTHER	OTHER
Q54QE6	Q9NTG7	OTHER	mTP
Q54QF8	Q9H3L0	OTHER	mTP
Q54QJ2	Q9NX74	OTHER	OTHER
Q54QM4	P49916	OTHER	OTHER
Q54QN6	Q96LJ7	OTHER	OTHER
Q54QX0	Q9BUP0	OTHER	OTHER
Q54QX7	Q9NP80	OTHER	OTHER
Q54RA2	P30038	mTP	mTP
Q54RC3	Q969P6	OTHER	mTP
Q54RE8	O15229	OTHER	OTHER
Q54RI1	Q9BRX8	OTHER	OTHER
Q54RI8	P13995	OTHER	mTP
Q54RS3	Q8NFF5	OTHER	OTHER
Q54RU1	Q9NP58	OTHER	OTHER
Q54RY8	Q9H0N5	OTHER	mTP
Q54S89	Q9UKK9	OTHER	OTHER
Q54SJ6	Q00059	OTHER	mTP
Q54SK0	O15528	SP	OTHER
Q54SL7	A8MUP2	OTHER	mTP
Q54SM3	P30405	OTHER	mTP
Q54SR7	Q96AY3	SP	SP
Q54SS0	Q13011	OTHER	mTP
Q54SV9	Q07973	SP	mTP
Q54T01	Q9P2J9	OTHER	OTHER
Q54T49	O75608	OTHER	OTHER
Q54T91	Q86WA6	OTHER	mTP
Q54TL4	Q96CB9	OTHER	OTHER
Q54TY4	Q15046	OTHER	OTHER
Q54U38	Q9BUP3	SP	OTHER
Q54U83	P50583	OTHER	OTHER
Q54UF1	P36404	OTHER	OTHER
Q54US8	Q96CU9	OTHER	mTP
Q54VA8	Q9UI43	OTHER	OTHER
Q54VE3	Q9BQD7	OTHER	OTHER
Q54VM9	Q5TC12	OTHER	mTP
Q54VX0	Q9Y3D6	OTHER	OTHER
Q54VX7	P78537	OTHER	OTHER
Q54VY2	Q8NI37	OTHER	mTP
Q54WD6	Q32P41	OTHER	mTP
Q54WH0	Q7KZF4	OTHER	OTHER
Q54X98	O75417	OTHER	OTHER
Q54XF2	Q16774	OTHER	OTHER
Q54XJ3	Q86U90	OTHER	OTHER
Q54XJ8	P51687	OTHER	mTP
Q54XM0	Q8WUD6	OTHER	OTHER
Q54XR4	Q96DB5	OTHER	mTP
Q54XZ7	Q9Y5R4	OTHER	mTP
Q54Y20	Q5JTZ9	OTHER	mTP
Q54Y26	Q09013	OTHER	OTHER
Q54Y27	Q14318	OTHER	OTHER
Q54Y43	Q9NVV4	OTHER	mTP
Q54YA0	P53396	OTHER	OTHER
Q54YG0	Q53H82	OTHER	mTP
Q54YH9	Q9BQ69	OTHER	OTHER
Q54YN2	O43708	OTHER	OTHER
Q54YS6	Q9NVS9	OTHER	mTP
Q54Z26	P34897	OTHER	mTP
Q54Z60	Q9NUB1	OTHER	mTP
Q551C2	P49247	OTHER	OTHER
Q551H3	Q9UJ68	SP	SP
Q551V8	Q96PN6	OTHER	OTHER
Q553B1	Q9NUL7	OTHER	mTP
Q555L5	P30048	mTP	mTP
Q555P2	Q96QU6	OTHER	OTHER
Q555V8	Q8N159	OTHER	mTP
Q556G7	Q7L0Y3	OTHER	mTP
Q556W3	Q5T1C6	OTHER	mTP
Q556Y2	Q9Y3B8	OTHER	mTP
Q556Y8	Q9Y6J8	OTHER	OTHER
Q557E7	Q969V5	OTHER	SP
Q558Z0	Q5T160	OTHER	OTHER
Q55AS5	P21964	OTHER	OTHER
Q55BX2	Q8TB22	OTHER	mTP
Q55CE3	Q14596	OTHER	OTHER
Q55CF8	Q8N2A8	SP	SP
Q55CR1	Q9UJZ1	OTHER	mTP
Q55CV0	Q8NCW5	OTHER	SP
Q55CZ2	Q9NUQ2	OTHER	OTHER
Q55DN6	P55084	OTHER	mTP
Q55DR2	P56962	OTHER	OTHER
Q55DR6	Q9UKU0	OTHER	OTHER
Q55DR9	Q9BYN8	OTHER	mTP
Q55E19	Q14154	SP	mTP
Q55E34	Q96C36	OTHER	mTP
Q55E83	Q9GZT8	OTHER	OTHER
Q55EV5	Q96LW4	OTHER	OTHER
Q55EX4	P42704	OTHER	mTP
Q55FJ4	Q9H611	OTHER	OTHER
Q55FL1	Q7Z6M4	OTHER	mTP
Q55FR3	Q96LL9	OTHER	mTP
Q55FT1	Q02127	OTHER	OTHER
Q55FU9	Q969Q5	OTHER	OTHER
Q55G91	Q9HB07	OTHER	SP
Q55GF0	Q8NFU3	OTHER	OTHER
Q55GQ5	P00441	OTHER	OTHER
Q5FXM5	P07108	OTHER	OTHER
Q5V9F0	P28838	OTHER	mTP
Q6TU48	Q16798	OTHER	mTP
Q75JT6	Q08257	OTHER	OTHER
Q76NV5	Q96IR7	OTHER	OTHER
Q7KWK0	Q8N573	OTHER	OTHER
Q869L3	A3KMH1	OTHER	OTHER
Q869N7	Q8N4Q0	OTHER	OTHER
Q869W9	P49327	OTHER	OTHER
Q869Y3	Q3SXM5	OTHER	OTHER
Q869Z1	Q7L2E3	OTHER	OTHER
Q86A17	P09417	OTHER	mTP
Q86AS6	P49590	OTHER	mTP
Q86B06	Q96GA7	OTHER	OTHER
Q86H62	Q86SX6	OTHER	mTP
Q86H88	Q96DV4	OTHER	mTP
Q86I22	Q6P587	OTHER	OTHER
Q86IC8	Q86VU5	OTHER	SP
Q86IG3	Q8WUK0	OTHER	OTHER
Q86IV6	P51530	OTHER	OTHER
Q86IY4	P09110	OTHER	OTHER
Q86JE3	Q99714	OTHER	mTP
Q86JJ0	Q9BVS5	OTHER	mTP
Q86K43	P78549	OTHER	OTHER
Q86KB3	Q70CQ3	OTHER	OTHER
Q86KD0	Q9Y3E2	OTHER	mTP
Q86KF9	Q53H12	OTHER	OTHER
Q86KK2	P49789	OTHER	OTHER
Q86KR5	P52758	OTHER	mTP
Q86KU2	Q5ST30	OTHER	mTP
Q8T137	Q9NNW7	OTHER	mTP
Q8T199	Q9H825	OTHER	mTP
Q8T2T4	Q9UKA2	OTHER	OTHER
Q8T2T7	Q13472	OTHER	OTHER
Q8T6J2	Q8IUA7	OTHER	OTHER
Q8T8P3	P28288	OTHER	OTHER
Q94464	O60313	OTHER	mTP
Q9NH02	Q13907	OTHER	OTHER
Q9NH03	P14324	OTHER	mTP
Q9U1M8	Q96H55	OTHER	OTHER
*Note: While this protein does not have a MTS and its human homolog does, this protein is included in the final compendium because it is mitochondria-encoded

## Sheet: Table S2
Table S2. Proteomics discovery relative enrichments and relative enrichment ratios. Relative enrichment ratios (columns 2-4) and their respective p-values (columns 5-7) for samples quantified in the proteomic discovery experiment. Relative enrichments from lysate (columns 8 and 9), crude mitochondria (columns 10 and 11), and purified mitochondria (columns 12 and 13) samples. All sample enrichment…
Relative enrichment ratios							Lysate relative enrichment		Crude mito relative enrichment		Pure mito relative enrichment
Dicty Uniprot ID	Enrichment Ratio: (2) / (1)	Enrichment Ratio: (3) / (1)	Enrichment Ratio: (3) / (2)	Enrichment Ratio Adj. P-Value: (2) / (1)	Enrichment Ratio Adj. P-Value: (3) / (1)	Enrichment Ratio Adj. P-Value: (3) / (2)	Dicty Uniprot ID	Enrichments (Grouped): 1	Dicty Uniprot ID	Enrichments (Grouped): 2	Dicty Uniprot ID	Enrichments (Grouped): 3
Q01501	2.433	2.865	1.178	0.060711	0.0269737	0.883387	Q01501	100	Q01501	243.3	Q01501	286.5
Q54YA6	2.648	2.627	0.992	0.0084419	0.00456654	0.99187	Q54YA6	97.5	Q54YA6	258.3	Q54YA6	256.2
Q869N6	2.292	2.566	1.119	0.00627147	0.00470747	0.97739	Q869N6	101.7	Q869N6	233.1	Q869N6	260.9
Q54UK2	2.148	2.252	1.048	0.00012597	4.047e-05	0.695899	Q54UK2	98.2	Q54UK2	210.9	Q54UK2	221.1
Q54YN1	1.716	2.243	1.308	0.0348985	0.0105083	0.699283	Q54YN1	99.4	Q54YN1	170.6	Q54YN1	223.1
O97470	2.253	2.193	0.973	0.00018851	7.5287e-05	0.841104	O97470	94.5	O97470	212.9	O97470	207.2
Q54SI3	1.805	2.193	1.215	0.00499734	0.00144484	0.64737	Q54SI3	95.1	Q54SI3	171.8	Q54SI3	208.6
Q54RE9	1.905	2.184	1.146	0.00015486	4.1131e-05	0.0869828	Q54RE9	100	Q54RE9	190.5	Q54RE9	218.4
B0G168	3	2.022	0.674	0.249764	0.771915	0.560132	B0G168	91.3	B0G168	273.9	B0G168	184.6
Q54BF6	1.95	1.876	0.962	0.00019776	8.2433e-05	0.72383	Q54BF6	97.4	Q54BF6	189.9	Q54BF6	182.7
Q75K07	1.756	1.829	1.042	0.00237551	0.00144585	0.967074	Q75K07	86.6	Q75K07	152	Q75K07	158.4
Q54TT7	1.93	1.808	0.937	0.00056607	0.00028939	0.910466	Q54TT7	96.7	Q54TT7	186.5	Q54TT7	174.8
Q54P38	1.723	1.769	1.027	0.00027317	0.00010337	0.958804	Q54P38	100	Q54P38	172.3	Q54P38	176.9
O21042	1.53	1.753	1.145	0.474084	0.121233	0.596912	O21042	93.3	O21042	142.8	O21042	163.6
Q54JC2	1.805	1.745	0.967	0.00023076	9.8498e-05	0.938141	Q54JC2	99.2	Q54JC2	179	Q54JC2	173.2
Q552L9	1.761	1.738	0.987	0.0003365	0.0001569	0.964624	Q552L9	100	Q552L9	176.1	Q552L9	173.8
O21049	1.6	1.633	1.021	0.0001524	4.7955e-05	0.764076	O21049	99.8	O21049	159.6	O21049	162.9
Q76P15	1.49	1.614	1.083	0.269074	0.1608	0.955361	Q76P15	99.3	Q76P15	147.9	Q76P15	160.2
Q54QH7	1.669	1.597	0.957	0.00039995	0.00018379	0.991049	Q54QH7	97.7	Q54QH7	163.1	Q54QH7	156
Q54RS2	1.743	1.591	0.913	0.00071721	0.00053067	0.477133	Q54RS2	100	Q54RS2	174.3	Q54RS2	159.1
Q54V76	1.644	1.576	0.959	0.00061233	0.00032165	0.88921	Q54V76	102.9	Q54V76	169.2	Q54V76	162.2
P30815	1.123	1.54	1.371	0.715988	0.327291	0.78456	P30815	97.7	P30815	109.7	P30815	150.4
Q54N56	1.566	1.529	0.976	0.00111043	0.00052131	1	Q54N56	95.2	Q54N56	149.1	Q54N56	145.6
P26310	1.533	1.524	0.994	0.0675077	0.0321398	0.907579	P26310	100	P26310	153.3	P26310	152.4
Q54B67	1.549	1.504	0.971	0.00032443	0.00013859	1	Q54B67	95.5	Q54B67	147.8	Q54B67	143.6
Q54H66	1.519	1.498	0.986	0.00020159	7.3644e-05	0.912273	Q54H66	100	Q54H66	151.9	Q54H66	149.8
Q55CC8	1.486	1.496	1.007	0.00034873	0.00016068	0.979274	Q55CC8	100	Q55CC8	148.6	Q55CC8	149.6
Q54G09	1.564	1.483	0.948	0.0249444	0.0135158	0.965575	Q54G09	83.8	Q54G09	131.1	Q54G09	124.3
Q54JX6	1.384	1.48	1.069	0.00136532	0.00030068	0.256132	Q54JX6	95	Q54JX6	131.5	Q54JX6	140.6
Q86L28	1.455	1.476	1.015	0.00192048	0.00088084	0.996777	Q86L28	99.9	Q86L28	145.4	Q86L28	147.5
P20609	1.446	1.475	1.02	0.0855631	0.0192551	0.569349	P20609	96.6	P20609	139.7	P20609	142.5
Q55E91	1.315	1.473	1.121	0.00278714	0.00050605	0.223913	Q55E91	96.6	Q55E91	127	Q55E91	142.3
Q54QM2	1.366	1.468	1.075	0.00017147	4.2439e-05	0.0640085	Q54QM2	101.4	Q54QM2	138.4	Q54QM2	148.8
Q54QH6	1.403	1.462	1.042	0.0225392	0.00443144	0.447556	Q54QH6	100	Q54QH6	140.3	Q54QH6	146.2
Q55CS9	1.472	1.461	0.992	0.00108536	0.00045897	0.987856	Q55CS9	100	Q55CS9	147.2	Q55CS9	146.1
A9CLV7	1.374	1.447	1.053	0.0122776	0.00260344	0.463833	A9CLV7	100	A9CLV7	137.4	A9CLV7	144.7
Q54PX1	1.625	1.439	0.885	0.00045593	0.00069098	0.0814324	Q54PX1	98.5	Q54PX1	160.1	Q54PX1	141.8
Q55AD7	1.493	1.439	0.964	0.00027976	0.00016692	0.364689	Q55AD7	97.5	Q55AD7	145.6	Q55AD7	140.3
A9CLV8	1.447	1.438	0.994	0.00054944	0.00029763	0.820749	A9CLV8	100	A9CLV8	144.7	A9CLV8	143.8
O21050	1.43	1.429	0.999	0.00123905	0.0004181	0.777705	O21050	95.9	O21050	137.1	O21050	137
Q55FH5	1.298	1.401	1.079	0.00202832	0.0005968	0.61566	Q55FH5	99.1	Q55FH5	128.6	Q55FH5	138.8
Q55G38	1.44	1.395	0.969	0.00346172	0.00218923	0.981362	Q55G38	94.8	Q55G38	136.6	Q55G38	132.3
Q1ZXP3	1.417	1.391	0.981	0.0001524	5.8883e-05	0.683103	Q1ZXP3	99.5	Q1ZXP3	141	Q1ZXP3	138.4
Q54RB9	1.478	1.391	0.941	0.00045612	0.00026307	0.690083	Q54RB9	96.9	Q54RB9	143.2	Q54RB9	134.8
Q55BP9	1.463	1.388	0.949	0.00292799	0.00410018	0.466115	Q55BP9	99.3	Q55BP9	145.3	Q55BP9	137.9
Q55GW4	1.405	1.382	0.984	0.00247342	0.00089052	0.842392	Q55GW4	95	Q55GW4	133.5	Q55GW4	131.3
Q8T2T5	1.413	1.381	0.977	0.00113975	0.00089291	0.567627	Q8T2T5	99.6	Q8T2T5	140.8	Q8T2T5	137.6
Q54C69	1.279	1.38	1.079	0.00091691	0.00019898	0.178577	Q54C69	98.8	Q54C69	126.4	Q54C69	136.4
Q55C70	1.577	1.379	0.875	0.00077204	0.001614	0.0924284	Q55C70	97.8	Q55C70	154.3	Q55C70	135
Q54DI4	1.503	1.377	0.916	0.00505721	0.0066289	0.662493	Q54DI4	97.4	Q54DI4	146.3	Q54DI4	134.1
C7FZZ8	1.448	1.369	0.946	0.00149188	0.000825	0.964538	C7FZZ8	97	C7FZZ8	140.4	C7FZZ8	132.8
O21048	1.316	1.367	1.038	0.00827305	0.00394159	0.961304	O21048	94.9	O21048	124.8	O21048	129.6
Q54YX7	1.709	1.358	0.794	0.0080216	0.0199961	0.441988	Q54YX7	97.5	Q54YX7	166.6	Q54YX7	132.4
Q54XU9	1.406	1.356	0.964	0.0534466	0.0971056	0.835382	Q54XU9	88.9	Q54XU9	125	Q54XU9	120.6
Q54VU6	1.303	1.355	1.04	0.0040293	0.00189386	0.984529	Q54VU6	102.8	Q54VU6	133.9	Q54VU6	139.2
P22237	1.363	1.354	0.994	0.00954046	0.00513773	0.989413	P22237	102.1	P22237	139.1	P22237	138.2
Q54P11	1.42	1.354	0.953	0.00077426	0.00070428	0.322286	Q54P11	95.8	Q54P11	136.1	Q54P11	129.8
Q55GV8	1.426	1.351	0.947	0.00239477	0.0040715	0.319569	Q55GV8	98.2	Q55GV8	140	Q55GV8	132.6
Q54UB7	1.406	1.345	0.956	0.00013653	6.4038e-05	0.159738	Q54UB7	97.4	Q54UB7	137	Q54UB7	130.9
C7G004	1.445	1.342	0.929	0.00460144	0.00904356	0.420573	C7G004	96.9	C7G004	140	C7G004	130
Q86K89	1.244	1.342	1.079	0.00056669	0.00013739	0.175595	Q86K89	100	Q86K89	124.4	Q86K89	134.2
Q4W6B5	1.3	1.321	1.016	0.00074743	0.00033313	1	Q4W6B5	99.1	Q4W6B5	128.8	Q4W6B5	130.9
Q54M82	1.278	1.317	1.031	0.10044	0.0536635	0.9413	Q54M82	103	Q54M82	131.7	Q54M82	135.7
B0M0Q3	1.273	1.302	1.023	0.00975414	0.0128463	0.78456	B0M0Q3	99.8	B0M0Q3	127	B0M0Q3	129.9
Q54MN5	1.321	1.301	0.985	0.00687183	0.00278254	0.892698	Q54MN5	105.8	Q54MN5	139.8	Q54MN5	137.6
Q9U641	1.465	1.301	0.889	0.00045864	0.00051007	0.127388	Q9U641	99.8	Q9U641	146.2	Q9U641	129.9
Q86KK8	1.445	1.296	0.897	0.00131664	0.00297122	0.133672	Q86KK8	91.1	Q86KK8	131.6	Q86KK8	118.1
Q557F3	1.374	1.292	0.94	0.00520096	0.00812595	0.567533	Q557F3	100	Q557F3	137.4	Q557F3	129.2
Q86AE2	1.506	1.29	0.857	0.00232399	0.0104154	0.119625	Q86AE2	98.9	Q86AE2	148.9	Q86AE2	127.5
Q9XPJ9	1.321	1.285	0.973	0.00475242	0.00487742	0.788744	Q9XPJ9	100	Q9XPJ9	132.1	Q9XPJ9	128.5
Q86JL1	1.165	1.282	1.101	0.0219417	0.0025204	0.220895	Q86JL1	100	Q86JL1	116.5	Q86JL1	128.2
Q54VX4	1.312	1.28	0.976	0.0666593	0.0924955	0.938563	Q54VX4	100	Q54VX4	131.2	Q54VX4	128
Q54LR4	1.272	1.267	0.996	0.00096948	0.00039087	0.964108	Q54LR4	101.5	Q54LR4	129.1	Q54LR4	128.6
Q552A1	1.265	1.267	1.001	0.016503	0.0119138	1	Q552A1	98.5	Q552A1	124.7	Q552A1	124.8
Q54L97	1.299	1.264	0.973	0.00508881	0.008001	0.558878	Q54L97	100	Q54L97	129.9	Q54L97	126.4
Q54TK2	1.266	1.264	0.999	0.00472769	0.00500286	0.768968	Q54TK2	96.9	Q54TK2	122.7	Q54TK2	122.5
Q54HM6	1.331	1.263	0.949	0.00346154	0.00455888	0.550231	Q54HM6	100	Q54HM6	133.1	Q54HM6	126.3
Q86K57	1.252	1.26	1.007	0.00482146	0.00186585	0.882081	Q86K57	96	Q86K57	120.1	Q86K57	120.9
Q54U34	1.157	1.259	1.088	0.0400216	0.00606874	0.356663	Q54U34	103.8	Q54U34	120.1	Q54U34	130.7
Q54RB6	1.244	1.253	1.007	0.0484814	0.0401233	1	Q54RB6	100	Q54RB6	124.4	Q54RB6	125.3
Q54TD4	1.4	1.249	0.893	0.0002014	0.00025384	0.0333293	Q54TD4	101.2	Q54TD4	141.6	Q54TD4	126.4
C7G062	0.989	1.246	1.259	0.995287	0.134072	0.159963	C7G062	95.7	C7G062	94.7	C7G062	119.2
Q8MP23	1.432	1.245	0.87	0.0109638	0.034335	0.407755	Q8MP23	100	Q8MP23	143.2	Q8MP23	124.6
Q559Z4	1.216	1.243	1.022	0.00413673	0.00250878	0.997503	Q559Z4	98.1	Q559Z4	119.4	Q559Z4	122
Q54WP1	0.994	1.241	1.248	0.998489	0.1856	0.252606	Q54WP1	93.6	Q54WP1	93.1	Q54WP1	116.1
Q54L27	1.312	1.237	0.943	0.00150332	0.00141956	0.502428	Q54L27	100	Q54L27	131.2	Q54L27	123.7
Q54E48	1.267	1.233	0.972	0.00155062	0.00136004	0.572763	Q54E48	100.1	Q54E48	126.9	Q54E48	123.4
Q54D02	1.155	1.228	1.063	0.0905623	0.0426338	0.902433	Q54D02	100	Q54D02	115.5	Q54D02	122.8
Q54QN4	1.217	1.223	1.005	0.0106807	0.00213831	0.424726	Q54QN4	100	Q54QN4	121.7	Q54QN4	122.3
Q23885	1.146	1.222	1.066	0.00712463	0.00093094	0.180958	Q23885	100.7	Q23885	115.4	Q23885	123
Q54VK2	1.24	1.222	0.986	0.307623	0.217728	0.984104	Q54VK2	100	Q54VK2	124	Q54VK2	122.2
Q54N01	1.331	1.217	0.914	0.0105563	0.0372965	0.359905	Q54N01	97.3	Q54N01	129.5	Q54N01	118.4
Q86JB5	1.373	1.216	0.886	0.00558762	0.0218571	0.238208	Q86JB5	100	Q86JB5	137.3	Q86JB5	121.6
Q54XR6	1.149	1.215	1.057	0.0189678	0.00364434	0.4293	Q54XR6	97.5	Q54XR6	112	Q54XR6	118.4
Q55CK0	1.122	1.215	1.083	0.00747629	0.00066939	0.105224	Q55CK0	97	Q55CK0	108.8	Q55CK0	117.9
Q55F64	1.022	1.215	1.19	0.917165	0.804658	0.986835	Q55F64	87	Q55F64	88.9	Q55F64	105.7
Q54LT0	1.349	1.212	0.899	0.00027317	0.00042532	0.0389144	Q54LT0	98.9	Q54LT0	133.4	Q54LT0	119.9
Q55G08	1.142	1.21	1.06	0.0129581	0.00273544	0.461063	Q55G08	101.4	Q55G08	115.8	Q55G08	122.7
Q23889	1.32	1.206	0.914	0.178677	0.411307	0.76733	Q23889	96.3	Q23889	127.1	Q23889	116.1
P29505	1.104	1.205	1.092	0.98851	0.479254	0.615763	P29505	97.2	P29505	107.3	P29505	117.2
Q552Y0	1.385	1.205	0.87	0.00208937	0.00618273	0.156026	Q552Y0	97.5	Q552Y0	135	Q552Y0	117.4
Q54K54	1.285	1.204	0.937	0.0130667	0.00844341	1	Q54K54	97.8	Q54K54	125.7	Q54K54	117.7
Q54FA9	1.244	1.203	0.967	0.00284186	0.00164702	0.992698	Q54FA9	102.5	Q54FA9	127.5	Q54FA9	123.2
Q55BS6	1.115	1.203	1.079	0.0986021	0.0383543	0.827194	Q55BS6	100	Q55BS6	111.5	Q55BS6	120.3
Q54ZW2	1.121	1.2	1.071	0.0249084	0.00480669	0.44363	Q54ZW2	101.5	Q54ZW2	113.8	Q54ZW2	121.9
Q54QV8	1.188	1.196	1.007	0.0963595	0.103558	0.992698	Q54QV8	98.5	Q54QV8	117	Q54QV8	117.8
Q54D88	1.317	1.19	0.904	0.00243042	0.00747401	0.168413	Q54D88	100	Q54D88	131.7	Q54D88	119
Q551I4	1.247	1.19	0.955	0.00365373	0.00409107	0.669965	Q551I4	100	Q551I4	124.7	Q551I4	119
Q54G88	1.156	1.187	1.027	0.00415971	0.00121352	0.65008	Q54G88	100	Q54G88	115.6	Q54G88	118.7
Q54RA8	1.2	1.185	0.988	0.0609997	0.0773021	0.959031	Q54RA8	100.1	Q54RA8	120.1	Q54RA8	118.6
O21047	1.2	1.184	0.987	0.00378615	0.00247678	0.979274	O21047	95.5	O21047	114.6	O21047	113.1
Q54JS1	1.289	1.184	0.918	0.00036185	0.00098034	0.0336671	Q54JS1	99.3	Q54JS1	127.9	Q54JS1	117.5
Q54E30	1.1	1.183	1.076	0.0583243	0.0202745	0.776847	Q54E30	100	Q54E30	110	Q54E30	118.3
Q54Q31	1.31	1.183	0.903	0.00420466	0.0225238	0.15471	Q54Q31	96.4	Q54Q31	126.2	Q54Q31	114
Q54NI6	1.161	1.18	1.016	0.0292648	0.00618273	0.497544	Q54NI6	97.4	Q54NI6	113.1	Q54NI6	114.9
Q54CB8	1.205	1.179	0.978	0.0328416	0.0725561	0.714398	Q54CB8	101.3	Q54CB8	122.2	Q54CB8	119.5
B0G0Z7	1.204	1.177	0.978	0.0174998	0.0184977	0.94861	B0G0Z7	100	B0G0Z7	120.4	B0G0Z7	117.7
Q55EC2	1.121	1.177	1.05	0.00143791	0.00016661	0.0556613	Q55EC2	101.9	Q55EC2	114.2	Q55EC2	120
Q86HX0	1.143	1.177	1.029	0.0288661	0.023872	1	Q86HX0	102.2	Q86HX0	116.9	Q86HX0	120.3
Q75JT7	1.275	1.176	0.922	0.00627496	0.013247	0.461753	Q75JT7	100	Q75JT7	127.5	Q75JT7	117.6
Q54CA5	1.13	1.174	1.039	0.00698027	0.00322153	0.95572	Q54CA5	99.9	Q54CA5	112.9	Q54CA5	117.3
B0G0Y7	1.179	1.172	0.994	0.00262991	0.0008376	0.717454	B0G0Y7	100.2	B0G0Y7	118.1	B0G0Y7	117.4
Q54XM1	1.204	1.171	0.972	0.0709411	0.308897	0.484573	Q54XM1	100	Q54XM1	120.4	Q54XM1	117.1
Q75JN4	1.108	1.171	1.056	0.00852213	0.00107243	0.182951	Q75JN4	100	Q75JN4	110.8	Q75JN4	117.1
B0G159	1.273	1.168	0.918	0.0017978	0.0111836	0.0826593	B0G159	101.7	B0G159	129.4	B0G159	118.8
Q54QC2	1.187	1.162	0.979	0.00076874	0.00060066	0.447928	Q54QC2	98.1	Q54QC2	116.5	Q54QC2	114
Q54DT8	1.167	1.158	0.992	0.0456025	0.220011	0.42993	Q54DT8	97	Q54DT8	113.2	Q54DT8	112.3
Q86AH1	1.165	1.158	0.993	0.00055998	0.00038606	0.477041	Q86AH1	97.1	Q86AH1	113.1	Q86AH1	112.4
Q86I17	1.294	1.158	0.895	0.0152353	0.0447403	0.488894	Q86I17	100	Q86I17	129.4	Q86I17	115.8
Q55CC2	1.207	1.156	0.957	0.0971764	0.0933794	1	Q55CC2	100	Q55CC2	120.7	Q55CC2	115.6
Q54DU1	1.226	1.154	0.941	0.00246824	0.00489607	0.270479	Q54DU1	98.9	Q54DU1	121.3	Q54DU1	114.1
Q54KN1	1.184	1.152	0.973	0.0403357	0.247355	0.344234	Q54KN1	100	Q54KN1	118.4	Q54KN1	115.2
Q1ZXD4	1.231	1.151	0.935	0.00143831	0.00272099	0.175121	Q1ZXD4	95.9	Q1ZXD4	118.1	Q1ZXD4	110.4
Q54UV0	1.126	1.148	1.02	0.0293473	0.0172927	0.980372	Q54UV0	100	Q54UV0	112.6	Q54UV0	114.8
Q54D99	1.016	1.146	1.128	0.956462	0.0105461	0.0544587	Q54D99	104	Q54D99	105.7	Q54D99	119.2
Q86I71	1.242	1.146	0.923	0.0987474	0.741437	0.266579	Q86I71	97	Q86I71	120.4	Q86I71	111.1
Q54XH7	1.169	1.145	0.979	0.00164476	0.00155221	0.535936	Q54XH7	100	Q54XH7	116.9	Q54XH7	114.5
Q86AD5	1.136	1.145	1.008	0.0397441	0.0345762	1	Q86AD5	100.2	Q86AD5	113.9	Q86AD5	114.8
Q55D79	1.12	1.144	1.021	0.0425408	0.0236385	0.961908	Q55D79	100	Q55D79	112	Q55D79	114.4
Q54RP1	1.289	1.143	0.887	0.00563188	0.017339	0.30046	Q54RP1	98.2	Q54RP1	126.5	Q54RP1	112.2
P90520	1.199	1.142	0.952	0.0179062	0.127164	0.247822	P90520	98.5	P90520	118.1	P90520	112.4
Q54DK1	1.158	1.142	0.986	0.109747	0.288503	0.709956	Q54DK1	100.9	Q54DK1	116.9	Q54DK1	115.2
Q54PV9	1.2	1.142	0.952	0.0272601	0.0439919	0.83101	Q54PV9	100	Q54PV9	120	Q54PV9	114.2
Q7KWR8	1.365	1.141	0.836	0.0313854	0.0999325	0.554065	Q7KWR8	98.7	Q7KWR8	134.8	Q7KWR8	112.7
Q55GD7	1.203	1.139	0.947	0.00208513	0.00358249	0.280291	Q55GD7	98.3	Q55GD7	118.3	Q55GD7	112
Q75JS8	1.303	1.139	0.874	0.00136931	0.0392721	0.0324764	Q75JS8	98.2	Q75JS8	127.9	Q75JS8	111.8
Q54MV7	0.995	1.138	1.144	0.99109	0.0156296	0.0619166	Q54MV7	101.1	Q54MV7	100.5	Q54MV7	115
Q54F93	1.195	1.135	0.95	0.00117707	0.00320342	0.102929	Q54F93	98.5	Q54F93	117.8	Q54F93	111.9
Q54WN8	1.185	1.135	0.958	0.0305926	0.0938801	0.566619	Q54WN8	100.6	Q54WN8	119.2	Q54WN8	114.2
Q54VB3	1.08	1.134	1.05	0.68402	0.140167	0.458753	Q54VB3	100	Q54VB3	108	Q54VB3	113.4
Q55GJ5	1.176	1.133	0.964	0.0187436	0.0135434	1	Q55GJ5	100	Q55GJ5	117.6	Q55GJ5	113.3
Q86H83	1.19	1.133	0.952	0.00967709	0.0176933	0.615763	Q86H83	98.8	Q86H83	117.6	Q86H83	111.9
Q55BF1	1.171	1.132	0.967	0.0436923	0.101693	0.718859	Q55BF1	99.1	Q55BF1	116	Q55BF1	112.1
Q54LM9	1.263	1.13	0.895	0.00218097	0.0121137	0.100859	Q54LM9	98	Q54LM9	123.8	Q54LM9	110.8
Q54C70	1.139	1.128	0.99	0.0179206	0.0485431	0.547301	Q54C70	99.3	Q54C70	113.1	Q54C70	112
Q8T866	1.167	1.127	0.966	0.0155175	0.0599513	0.392847	Q8T866	96.7	Q8T866	112.9	Q8T866	109
Q37314	1.151	1.122	0.975	0.0305926	0.061488	0.74957	Q37314	91.5	Q37314	105.3	Q37314	102.7
Q54NW9	1.19	1.122	0.942	0.03978	0.248762	0.337019	Q54NW9	100.9	Q54NW9	120.1	Q54NW9	113.2
Q54D27	1.207	1.12	0.928	0.0209767	0.104188	0.352058	Q54D27	99	Q54D27	119.4	Q54D27	110.8
Q553K8	1.22	1.12	0.918	0.0617915	0.241687	0.523025	Q553K8	94.3	Q553K8	115	Q553K8	105.6
P36413	1.147	1.119	0.975	0.00289377	0.00419508	0.444754	P36413	100.7	P36413	115.4	P36413	112.6
Q54LH3	0.933	1.118	1.199	0.209789	0.294724	0.0713744	Q54LH3	98.6	Q54LH3	92	Q54LH3	110.3
Q55D19	1.252	1.118	0.893	0.0116268	0.176342	0.126402	Q55D19	103.6	Q55D19	129.7	Q55D19	115.9
Q55FB3	1.123	1.117	0.995	0.879824	0.991992	0.827412	Q55FB3	100.1	Q55FB3	112.4	Q55FB3	111.8
Q55F42	1.109	1.115	1.006	0.0616911	0.0515866	1	Q55F42	105.1	Q55F42	116.5	Q55F42	117.2
Q86AV5	1.21	1.115	0.921	0.0564593	0.0724421	0.954045	Q86AV5	97.5	Q86AV5	118	Q86AV5	108.8
Q54HG8	1.063	1.114	1.048	0.115824	0.012702	0.294936	Q54HG8	97.3	Q54HG8	103.4	Q54HG8	108.3
Q23891	1.036	1.11	1.071	0.572903	0.0303883	0.162754	Q23891	98	Q23891	101.6	Q23891	108.8
Q54P00	1.329	1.108	0.834	0.0204492	0.520755	0.106348	Q54P00	95	Q54P00	126.3	Q54P00	105.3
Q54QC1	1.181	1.108	0.938	0.0118735	0.0574448	0.288207	Q54QC1	99.5	Q54QC1	117.5	Q54QC1	110.2
Q54ZX5	1.074	1.108	1.032	0.0641605	0.041133	0.98463	Q54ZX5	99.1	Q54ZX5	106.4	Q54ZX5	109.8
Q86K64	1.096	1.107	1.01	0.130943	0.0182344	0.380972	Q86K64	100	Q86K64	109.6	Q86K64	110.7
Q553P4	1.017	1.106	1.088	0.991177	0.317565	0.427468	Q553P4	98.2	Q553P4	99.8	Q553P4	108.6
Q8T1V6	1.086	1.104	1.016	0.0274574	0.0275904	0.981316	Q8T1V6	101	Q8T1V6	109.7	Q8T1V6	111.5
Q54W21	1.162	1.102	0.949	0.0350728	0.097276	0.622562	Q54W21	96.5	Q54W21	112.1	Q54W21	106.3
Q55EE3	1.062	1.101	1.036	0.171925	0.211613	0.979963	Q55EE3	100.4	Q55EE3	106.6	Q55EE3	110.5
Q553N4	1.142	1.1	0.963	0.0631361	0.0746691	0.974581	Q553N4	100	Q553N4	114.2	Q553N4	110
Q54VJ9	1.19	1.099	0.923	0.012873	0.0803482	0.242346	Q54VJ9	100	Q54VJ9	119	Q54VJ9	109.9
Q54TR3	1.04	1.098	1.056	0.792587	0.0439359	0.152045	Q54TR3	100	Q54TR3	104	Q54TR3	109.8
Q54WP3	1.05	1.097	1.045	0.118031	0.0275576	0.594256	Q54WP3	99.1	Q54WP3	104	Q54WP3	108.7
Q75JK6	1.129	1.097	0.971	0.719654	0.729548	1	Q75JK6	103.2	Q75JK6	116.6	Q75JK6	113.2
Q552S2	1.123	1.096	0.976	0.0149008	0.0435829	0.486424	Q552S2	99.1	Q552S2	111.3	Q552S2	108.6
Q54FH4	1.031	1.094	1.062	0.926407	0.775828	0.971453	Q54FH4	100	Q54FH4	103.1	Q54FH4	109.4
Q54XN1	1.162	1.094	0.941	0.00633275	0.0308436	0.212241	Q54XN1	99.5	Q54XN1	115.6	Q54XN1	108.8
Q557J7	1.09	1.091	1.001	0.791086	0.697348	0.996079	Q557J7	89	Q557J7	97	Q557J7	97.1
Q54CG9	1.111	1.086	0.978	0.546301	0.408022	0.981561	Q54CG9	100	Q54CG9	111.1	Q54CG9	108.6
Q54JK6	1.132	1.085	0.958	0.0671767	0.184696	0.676704	Q54JK6	99.4	Q54JK6	112.5	Q54JK6	107.8
Q54F09	1.054	1.082	1.026	0.320736	0.655638	0.788507	Q54F09	99.7	Q54F09	105.1	Q54F09	107.8
Q54JZ8	1.128	1.082	0.959	0.0413545	0.0499359	0.958354	Q54JZ8	100	Q54JZ8	112.8	Q54JZ8	108.2
Q54KH9	1.047	1.082	1.034	0.967605	0.97988	0.903511	Q54KH9	95.7	Q54KH9	100.1	Q54KH9	103.5
Q54EN1	1.129	1.08	0.957	0.0669444	0.0811022	0.971345	Q54EN1	99.9	Q54EN1	112.8	Q54EN1	108
Q9U3X4	1.144	1.08	0.944	0.0534466	0.0636391	0.968783	Q9U3X4	98.8	Q9U3X4	113	Q9U3X4	106.7
O21039	0.987	1.079	1.093	0.995189	0.632539	0.594203	O21039	100	O21039	98.7	O21039	107.9
Q869Y7	1.15	1.078	0.937	0.211789	0.411805	0.840452	Q869Y7	100	Q869Y7	115	Q869Y7	107.8
Q54TR7	1.075	1.076	1	0.334813	0.257591	0.99327	Q54TR7	101	Q54TR7	108.6	Q54TR7	108.6
Q556G9	1.202	1.068	0.889	0.00726743	0.30533	0.067752	Q556G9	95.2	Q556G9	114.5	Q556G9	101.8
Q55FN7	1.122	1.067	0.951	0.0129568	0.138509	0.164013	Q55FN7	100.5	Q55FN7	112.8	Q55FN7	107.3
Q55DS3	1.14	1.066	0.935	0.218198	0.670025	0.594708	Q55DS3	100.2	Q55DS3	114.2	Q55DS3	106.9
Q54CZ9	1.142	1.063	0.93	0.0443381	0.455888	0.220168	Q54CZ9	100	Q54CZ9	114.2	Q54CZ9	106.3
Q54DQ8	0.976	1.062	1.088	0.983922	0.999604	0.979334	Q54DQ8	95.4	Q54DQ8	93.1	Q54DQ8	101.3
Q55C23	1.087	1.062	0.976	0.212493	0.624864	0.6254	Q55C23	97.3	Q55C23	105.8	Q55C23	103.3
Q9TGM3	1.03	1.061	1.03	0.778381	0.125756	0.352373	Q9TGM3	98.5	Q9TGM3	101.4	Q9TGM3	104.5
Q55DD8	1.15	1.059	0.921	0.0339026	0.694752	0.122216	Q55DD8	100	Q55DD8	115	Q55DD8	105.9
Q556W7	1.024	1.058	1.033	0.655953	0.276028	0.765743	Q556W7	99	Q556W7	101.3	Q556W7	104.7
Q55GE2	1.128	1.058	0.938	0.0553945	0.210049	0.52971	Q55GE2	99.6	Q55GE2	112.4	Q55GE2	105.4
Q550W4	1.159	1.056	0.911	0.00306857	0.0960165	0.0530455	Q550W4	100	Q550W4	115.9	Q550W4	105.6
Q54NQ9	1.103	1.055	0.956	0.416103	0.339788	0.996733	Q54NQ9	100	Q54NQ9	110.3	Q54NQ9	105.5
Q54B21	1.126	1.053	0.935	0.137169	0.999604	0.162499	Q54B21	100.4	Q54B21	113	Q54B21	105.7
Q54IQ2	1.087	1.051	0.967	0.0411103	0.159934	0.50012	Q54IQ2	100	Q54IQ2	108.7	Q54IQ2	105.1
Q55BI2	0.954	1.051	1.102	0.723803	0.977375	0.850139	Q55BI2	97.5	Q55BI2	93	Q55BI2	102.5
Q55G45	1.131	1.049	0.927	0.0719051	0.806989	0.181262	Q55G45	99.1	Q55G45	112.1	Q55G45	104
O21037	1.08	1.048	0.971	0.813286	0.551169	0.923252	O21037	98	O21037	105.8	O21037	102.8
Q54F15	1.14	1.047	0.919	0.0618283	0.671208	0.201283	Q54F15	100	Q54F15	114	Q54F15	104.7
Q54JE4	1.094	1.047	0.957	0.106406	0.381158	0.568504	Q54JE4	99.7	Q54JE4	109.1	Q54JE4	104.4
Q54N53	1.072	1.046	0.976	0.0784942	0.268385	0.587614	Q54N53	95.1	Q54N53	101.9	Q54N53	99.5
Q54K70	1.227	1.045	0.852	0.0727355	0.989541	0.101227	Q54K70	98.1	Q54K70	120.4	Q54K70	102.6
Q54WD1	1.056	1.045	0.99	0.568651	0.999839	0.578121	Q54WD1	89.7	Q54WD1	94.7	Q54WD1	93.8
Q54QA4	1.076	1.042	0.968	0.0941286	0.382799	0.513051	Q54QA4	98.9	Q54QA4	106.4	Q54QA4	103.1
Q553S7	0.979	1.042	1.065	0.232364	0.489143	0.0964045	Q553S7	100	Q553S7	97.9	Q553S7	104.2
Q55GU3	1.16	1.042	0.898	0.253423	0.624129	0.70768	Q55GU3	100	Q55GU3	116	Q55GU3	104.2
B0G143	1.165	1.041	0.894	0.139103	0.357146	0.719378	B0G143	100	B0G143	116.5	B0G143	104.1
O21032	1.029	1.037	1.008	0.993897	0.741026	0.845607	O21032	95.8	O21032	98.5	O21032	99.3
Q54CY8	0.966	1.037	1.073	0.970085	0.524398	0.432127	Q54CY8	100	Q54CY8	96.6	Q54CY8	103.7
Q55GR1	1.044	1.036	0.992	0.463121	0.683989	0.921813	Q55GR1	100	Q55GR1	104.4	Q55GR1	103.6
Q54XD0	1.017	1.034	1.017	0.904716	0.951213	0.995107	Q54XD0	97.6	Q54XD0	99.3	Q54XD0	101
Q54I10	0.997	1.033	1.035	0.962078	0.910565	0.997831	Q54I10	99.5	Q54I10	99.3	Q54I10	102.8
Q54Z54	1.051	1.033	0.983	0.363626	0.299767	0.998146	Q54Z54	100	Q54Z54	105.1	Q54Z54	103.3
Q9XPI8	1.037	1.033	0.996	0.342566	0.402742	0.990424	Q9XPI8	100	Q9XPI8	103.7	Q9XPI8	103.3
Q54D07	1.152	1.032	0.896	0.114053	0.686554	0.334843	Q54D07	99.7	Q54D07	114.8	Q54D07	102.9
Q54G54	0.972	1.03	1.06	0.999986	0.719528	0.768818	Q54G54	100	Q54G54	97.3	Q54G54	103.1
Q557H6	1.06	1.03	0.972	0.549041	0.999653	0.584792	Q557H6	100.4	Q557H6	106.4	Q557H6	103.4
Q9XPI7	0.966	1.03	1.066	0.537474	0.991028	0.486868	Q9XPI7	100	Q9XPI7	96.6	Q9XPI7	103
Q54T96	1.139	1.027	0.901	0.0029046	0.122341	0.0456245	Q54T96	99.3	Q54T96	113.1	Q54T96	102
Q54XM6	1.061	1.027	0.968	0.329957	0.338495	1	Q54XM6	100	Q54XM6	106.1	Q54XM6	102.7
Q54DF1	0.994	1.026	1.032	0.986023	0.946852	0.997503	Q54DF1	99.3	Q54DF1	98.7	Q54DF1	101.9
P36967	0.915	1.021	1.115	0.783115	0.749353	1	P36967	100	P36967	91.5	P36967	102.1
Q1ZXB5	0.946	1.016	1.074	0.988571	0.926146	0.988851	Q1ZXB5	100.3	Q1ZXB5	94.8	Q1ZXB5	101.8
Q23890	0.977	1.015	1.04	0.556559	0.631377	0.217852	Q23890	101.8	Q23890	99.4	Q23890	103.4
Q55E94	1.03	1.015	0.985	0.349534	0.980826	0.456078	Q55E94	99.8	Q55E94	102.8	Q55E94	101.2
Q54HU6	1.042	1.014	0.973	0.471756	0.888614	0.743964	Q54HU6	100	Q54HU6	104.2	Q54HU6	101.4
Q54UU7	0.991	1.014	1.023	0.999986	0.793307	0.845559	Q54UU7	100	Q54UU7	99.1	Q54UU7	101.4
Q86K67	0.974	1.014	1.041	0.99481	0.860189	0.81552	Q86K67	98.4	Q86K67	95.8	Q86K67	99.8
O21036	1.009	1.013	1.004	0.737718	0.901235	0.955238	O21036	101	O21036	101.9	O21036	102.4
Q54H56	0.963	1.013	1.052	0.98366	0.623368	0.544322	Q54H56	100	Q54H56	96.3	Q54H56	101.3
Q54EW8	1.079	1.012	0.938	0.250059	0.97235	0.214754	Q54EW8	100	Q54EW8	107.9	Q54EW8	101.2
Q54HY7	1.219	1.012	0.83	0.00683423	0.995537	0.0269719	Q54HY7	105.9	Q54HY7	129.1	Q54HY7	107.1
Q54IW4	1.037	1.011	0.975	0.34897	0.770441	0.718851	Q54IW4	100	Q54IW4	103.7	Q54IW4	101.1
Q54UP6	1.224	1.011	0.826	0.0646582	0.507833	0.281159	Q54UP6	96.7	Q54UP6	118.4	Q54UP6	97.8
Q54YV4	1.094	1.011	0.924	0.0850677	0.656199	0.27272	Q54YV4	100	Q54YV4	109.4	Q54YV4	101.1
Q54RS6	1.208	1.005	0.832	0.179596	0.985323	0.175121	Q54RS6	96	Q54RS6	116	Q54RS6	96.5
Q54B92	1.14	1.004	0.881	0.158874	0.982844	0.158573	Q54B92	98.1	Q54B92	111.8	Q54B92	98.4
Q54E00	1.109	1.002	0.904	0.179232	0.971927	0.260742	Q54E00	94.7	Q54E00	105.1	Q54E00	95
Q54BM3	1.098	1.001	0.912	0.314852	0.931637	0.22901	Q54BM3	100	Q54BM3	109.8	Q54BM3	100.1
Q54BR2	0.989	1.001	1.012	0.816493	0.959435	0.950087	Q54BR2	99.8	Q54BR2	98.7	Q54BR2	99.9
Q54XU0	1.043	1.001	0.959	0.490488	0.900992	0.748439	Q54XU0	98.9	Q54XU0	103.2	Q54XU0	98.9
Q55ED6	1.118	1.001	0.895	0.535942	0.818453	0.294665	Q55ED6	97.5	Q55ED6	109	Q55ED6	97.6
Q54BW7	1.143	1	0.875	0.135875	0.971216	0.1365	Q54BW7	99.3	Q54BW7	113.5	Q54BW7	99.3
Q54QK2	1.105	1	0.905	0.0845577	0.997159	0.128929	Q54QK2	98.9	Q54QK2	109.3	Q54QK2	98.9
Q8MYF0	1.053	1	0.95	0.237661	0.990157	0.224676	Q8MYF0	101	Q8MYF0	106.4	Q8MYF0	101.1
Q54JB6	1.168	0.998	0.854	0.0418727	0.60875	0.0480258	Q54JB6	99.9	Q54JB6	116.7	Q54JB6	99.6
Q54MS4	0.968	0.998	1.031	0.958985	0.977427	0.885028	Q54MS4	97.9	Q54MS4	94.7	Q54MS4	97.7
Q54W11	1.082	0.997	0.921	0.119489	0.999764	0.155447	Q54W11	99.6	Q54W11	107.8	Q54W11	99.3
Q9GRX6	1.198	0.996	0.832	0.0541779	0.970323	0.109607	Q9GRX6	98.8	Q9GRX6	118.3	Q9GRX6	98.4
Q54VK0	1.068	0.995	0.932	0.00537198	0.912887	0.0290184	Q54VK0	100	Q54VK0	106.8	Q54VK0	99.5
Q23886	1.015	0.994	0.98	0.962344	0.867124	0.985696	Q23886	98.6	Q23886	100.1	Q23886	98.1
Q54JD2	0.982	0.994	1.012	0.844315	0.98552	0.93033	Q54JD2	99.1	Q54JD2	97.4	Q54JD2	98.5
Q54MZ4	1.092	0.993	0.909	0.0730741	0.992225	0.102929	Q54MZ4	100	Q54MZ4	109.2	Q54MZ4	99.3
Q555F1	1.058	0.993	0.939	0.736177	0.800666	0.995628	Q555F1	100	Q555F1	105.8	Q555F1	99.3
Q54I61	0.983	0.992	1.009	0.93142	0.692299	0.91885	Q54I61	100	Q54I61	98.3	Q54I61	99.2
Q8T131	0.966	0.992	1.027	0.227004	0.991612	0.287458	Q8T131	98.4	Q8T131	95	Q8T131	97.6
Q54B62	0.94	0.986	1.049	0.275859	0.993633	0.336916	Q54B62	99.6	Q54B62	93.6	Q54B62	98.2
Q55E10	0.974	0.986	1.013	0.915411	0.847346	0.997503	Q55E10	103.3	Q55E10	100.6	Q55E10	101.9
Q55GS7	1.047	0.983	0.939	0.0311501	0.205665	0.0262058	Q55GS7	98.4	Q55GS7	103	Q55GS7	96.8
Q55C27	1.027	0.981	0.955	0.994479	0.84118	0.794374	Q55C27	100	Q55C27	102.7	Q55C27	98.1
Q75JB5	1.179	0.981	0.832	0.314844	0.93276	0.49094	Q75JB5	91.5	Q75JB5	107.9	Q75JB5	89.8
Q55D72	1.011	0.98	0.97	0.875628	0.93203	0.696233	Q55D72	100	Q55D72	101.1	Q55D72	98
Q54JD9	1.023	0.976	0.954	0.65866	0.309259	0.143824	Q54JD9	100	Q54JD9	102.3	Q54JD9	97.6
Q553J7	1.044	0.976	0.935	0.635737	0.984484	0.558219	Q553J7	100	Q553J7	104.4	Q553J7	97.6
Q54I30	1.029	0.974	0.946	0.692482	0.961235	0.558292	Q54I30	98.6	Q54I30	101.5	Q54I30	96
Q54EU7	0.934	0.969	1.038	0.910675	0.89523	1	Q54EU7	100	Q54EU7	93.4	Q54EU7	96.9
Q54Q54	1.038	0.967	0.932	0.818021	0.997159	0.78743	Q54Q54	99.1	Q54Q54	102.8	Q54Q54	95.8
Q54M22	1.019	0.962	0.944	0.686104	0.844941	0.416827	Q54M22	100.5	Q54M22	102.4	Q54M22	96.7
Q54CY2	1.011	0.961	0.95	0.999986	0.673914	0.689641	Q54CY2	100	Q54CY2	101.1	Q54CY2	96.1
Q54TY5	0.834	0.96	1.152	0.350989	0.87279	0.614423	Q54TY5	100	Q54TY5	83.4	Q54TY5	96
Q54MU3	1.01	0.957	0.948	0.762921	0.551766	0.274971	Q54MU3	97	Q54MU3	98	Q54MU3	92.9
Q54NS5	0.957	0.957	1	0.630137	0.667964	1	Q54NS5	101.8	Q54NS5	97.4	Q54NS5	97.5
Q75JZ2	0.994	0.957	0.962	0.942046	0.343047	0.261016	Q75JZ2	100	Q75JZ2	99.4	Q75JZ2	95.7
Q54UX3	0.857	0.956	1.116	0.59223	0.994312	0.552629	Q54UX3	99	Q54UX3	84.8	Q54UX3	94.7
Q54W84	1.013	0.951	0.939	0.553002	0.952034	0.423582	Q54W84	100	Q54W84	101.3	Q54W84	95.1
Q23884	0.928	0.947	1.021	0.657992	0.997159	0.718851	Q23884	100	Q23884	92.8	Q23884	94.7
Q86JI0	0.971	0.947	0.976	0.999986	0.945175	0.937394	Q86JI0	89.5	Q86JI0	86.9	Q86JI0	84.8
Q54KP5	1.101	0.946	0.86	0.329296	0.997811	0.325759	Q54KP5	94.9	Q54KP5	104.4	Q54KP5	89.8
Q55CD9	1.113	0.946	0.85	0.209789	0.698601	0.115258	Q55CD9	99.6	Q55CD9	110.9	Q55CD9	94.2
Q54IB4	0.974	0.944	0.969	0.991166	0.763702	0.874603	Q54IB4	100	Q54IB4	97.4	Q54IB4	94.4
Q54IH6	0.972	0.943	0.971	0.782796	0.529787	0.930065	Q54IH6	100	Q54IH6	97.2	Q54IH6	94.3
Q54RB5	0.925	0.942	1.018	0.0130732	0.122854	0.178955	Q54RB5	100.3	Q54RB5	92.8	Q54RB5	94.5
Q54I67	1.006	0.941	0.935	0.999986	0.304247	0.32036	Q54I67	98.8	Q54I67	99.4	Q54I67	93
Q54NV9	0.945	0.94	0.995	0.505751	0.27339	0.898227	Q54NV9	100.6	Q54NV9	95	Q54NV9	94.5
Q54K38	1.139	0.939	0.824	0.130662	0.57834	0.0795347	Q54K38	100	Q54K38	113.9	Q54K38	93.9
Q559Z0	0.952	0.938	0.986	0.731744	0.301427	0.732453	Q559Z0	101.8	Q559Z0	96.9	Q559Z0	95.6
Q8MYE6	1.165	0.938	0.805	0.151423	0.895015	0.124435	Q8MYE6	100	Q8MYE6	116.5	Q8MYE6	93.8
Q54QN1	0.972	0.936	0.964	0.492576	0.0944986	0.478985	Q54QN1	100	Q54QN1	97.2	Q54QN1	93.6
Q552W5	0.938	0.936	0.999	0.737718	0.305594	0.732824	Q552W5	100	Q552W5	93.8	Q552W5	93.6
Q54J97	0.94	0.935	0.995	0.253795	0.427577	0.89599	Q54J97	102.6	Q54J97	96.4	Q54J97	95.9
Q55F30	1.057	0.935	0.884	0.363931	0.142227	0.0675172	Q55F30	100	Q55F30	105.7	Q55F30	93.5
Q54KT4	1.004	0.934	0.93	0.991166	0.72519	0.665264	Q54KT4	102	Q54KT4	102.4	Q54KT4	95.2
Q86L24	1.078	0.934	0.866	0.513037	0.585781	0.186078	Q86L24	99.5	Q86L24	107.3	Q86L24	92.9
Q8MXM8	1.108	0.934	0.842	0.272523	0.463097	0.10139	Q8MXM8	100	Q8MXM8	110.8	Q8MXM8	93.4
Q54TR2	0.916	0.931	1.016	0.105926	0.228052	0.796175	Q54TR2	100	Q54TR2	91.6	Q54TR2	93.1
Q55BP2	0.993	0.931	0.937	0.980593	0.132977	0.147331	Q55BP2	100	Q55BP2	99.3	Q55BP2	93.1
Q54NV4	0.936	0.929	0.993	0.735466	0.601203	0.987763	Q54NV4	100	Q54NV4	93.6	Q54NV4	92.9
Q54Y17	1.008	0.929	0.921	0.999986	0.0860039	0.1365	Q54Y17	98.4	Q54Y17	99.2	Q54Y17	91.3
Q556J9	0.995	0.929	0.934	0.999986	0.0355354	0.0841279	Q556J9	100	Q556J9	99.5	Q556J9	92.9
Q54IA8	0.862	0.927	1.076	0.143173	0.472714	0.5967	Q54IA8	103.2	Q54IA8	88.9	Q54IA8	95.6
Q54F29	0.974	0.926	0.951	0.788982	0.0894151	0.260065	Q54F29	99	Q54F29	96.4	Q54F29	91.7
Q54YS4	0.977	0.926	0.947	0.988265	0.663262	0.797893	Q54YS4	101.6	Q54YS4	99.3	Q54YS4	94.1
Q23888	0.912	0.923	1.012	0.467795	0.787719	0.843438	Q23888	93.2	Q23888	85	Q23888	86
Q553P7	0.953	0.921	0.967	0.62198	0.32722	0.866971	Q553P7	103.6	Q553P7	98.7	Q553P7	95.4
Q55CC7	1.005	0.921	0.916	0.866271	0.645503	0.406637	Q55CC7	96.9	Q55CC7	97.5	Q55CC7	89.3
P54872	0.785	0.918	1.169	0.249543	0.382637	0.93033	P54872	100	P54872	78.5	P54872	91.8
Q54B10	1.01	0.918	0.908	0.99691	0.109178	0.142737	Q54B10	100	Q54B10	101	Q54B10	91.7
Q54CL5	0.99	0.918	0.928	0.960238	0.918577	0.795239	Q54CL5	100	Q54CL5	99	Q54CL5	91.8
Q54CG8	0.985	0.917	0.931	0.980593	0.359732	0.504884	Q54CG8	101.7	Q54CG8	100.2	Q54CG8	93.2
Q54CK4	0.989	0.917	0.927	0.78932	0.549074	0.938252	Q54CK4	95.3	Q54CK4	94.3	Q54CK4	87.5
Q54YB8	1.128	0.917	0.813	0.243625	0.0639698	0.0395334	Q54YB8	100.7	Q54YB8	113.6	Q54YB8	92.3
Q54P46	0.893	0.916	1.026	0.0218899	0.0256588	0.933769	Q54P46	96.9	Q54P46	86.5	Q54P46	88.8
Q54YY9	1.042	0.916	0.879	0.944657	0.198951	0.171837	Q54YY9	100	Q54YY9	104.2	Q54YY9	91.6
Q54SM0	0.98	0.912	0.931	0.999986	0.126632	0.179796	Q54SM0	100	Q54SM0	98	Q54SM0	91.2
Q54QR8	1.005	0.911	0.906	0.818021	0.217451	0.507056	Q54QR8	100	Q54QR8	100.5	Q54QR8	91.1
Q1ZXN5	0.914	0.907	0.993	0.0308178	0.00502263	0.373406	Q1ZXN5	100	Q1ZXN5	91.4	Q1ZXN5	90.7
Q54XK0	0.919	0.907	0.987	0.65471	0.226455	0.679772	Q54XK0	100	Q54XK0	91.9	Q54XK0	90.7
Q54V61	0.877	0.906	1.033	0.0493239	0.0808988	0.87005	Q54V61	98.2	Q54V61	86.1	Q54V61	89
Q54VG0	0.849	0.905	1.066	0.00461995	0.0172053	0.220362	Q54VG0	98.7	Q54VG0	83.8	Q54VG0	89.3
Q54WA4	0.905	0.905	0.999	0.446797	0.264501	0.935245	Q54WA4	100	Q54WA4	90.5	Q54WA4	90.5
O21034	1.018	0.903	0.887	0.999225	0.554819	0.639405	O21034	101	O21034	102.9	O21034	91.2
Q54FE6	0.998	0.903	0.905	0.881933	0.0699026	0.178726	Q54FE6	100	Q54FE6	99.8	Q54FE6	90.3
Q54P39	1.082	0.903	0.835	0.300367	0.0653728	0.0440465	Q54P39	100.9	Q54P39	109.1	Q54P39	91.1
Q86IC5	0.978	0.903	0.923	0.94218	0.195015	0.348524	Q86IC5	100	Q86IC5	97.8	Q86IC5	90.3
Q54P71	0.973	0.902	0.927	0.698274	0.302867	0.767149	Q54P71	98.3	Q54P71	95.7	Q54P71	88.7
Q86HR5	0.949	0.901	0.949	0.0682991	0.00158065	0.0653269	Q86HR5	101	Q86HR5	95.8	Q86HR5	90.9
Q55DI2	1.018	0.9	0.884	0.160388	0.00487222	0.0123999	Q55DI2	104.4	Q55DI2	106.3	Q55DI2	94
Q55DY8	1.006	0.899	0.894	0.797821	0.0523053	0.0691401	Q55DY8	100	Q55DY8	100.6	Q55DY8	89.9
Q86HT3	1.029	0.899	0.874	0.683867	0.616042	0.267845	Q86HT3	100.1	Q86HT3	103.1	Q86HT3	90
Q54VN2	0.851	0.898	1.055	0.356237	0.652511	0.838538	Q54VN2	100.6	Q54VN2	85.6	Q54VN2	90.3
B0G196	0.881	0.896	1.018	0.155335	0.154451	1	B0G196	99.3	B0G196	87.5	B0G196	89
Q54RE7	0.937	0.895	0.955	0.3511	0.169329	0.879753	Q54RE7	98.8	Q54RE7	92.6	Q54RE7	88.4
Q54B26	0.956	0.894	0.935	0.315686	0.1506	0.880721	Q54B26	99.3	Q54B26	94.9	Q54B26	88.8
Q54F95	0.997	0.894	0.897	0.996327	0.406504	0.395536	Q54F95	100	Q54F95	99.7	Q54F95	89.4
Q54NW1	0.917	0.894	0.975	0.794131	0.425635	0.82877	Q54NW1	94.5	Q54NW1	86.6	Q54NW1	84.5
Q55BA6	0.932	0.893	0.959	0.162166	0.0290141	0.482201	Q55BA6	99	Q55BA6	92.3	Q55BA6	88.4
Q54GQ7	1.034	0.892	0.863	0.67064	0.0215072	0.0404216	Q54GQ7	98.9	Q54GQ7	102.3	Q54GQ7	88.2
Q54LV4	0.867	0.892	1.029	0.0664438	0.0708419	0.990578	Q54LV4	100	Q54LV4	86.7	Q54LV4	89.2
Q556I5	0.892	0.892	1.001	0.14446	0.0979198	0.986835	Q556I5	100	Q556I5	89.2	Q556I5	89.2
Q86H43	0.937	0.892	0.953	0.303282	0.0801387	0.640096	Q86H43	100	Q86H43	93.7	Q86H43	89.2
Q54IP6	0.955	0.891	0.934	0.994126	0.300026	0.398368	Q54IP6	100	Q54IP6	95.5	Q54IP6	89.1
Q54JM7	0.927	0.889	0.959	0.516761	0.112584	0.5228	Q54JM7	93.5	Q54JM7	86.7	Q54JM7	83.1
Q54I90	0.916	0.887	0.968	0.0383752	0.0117825	0.709956	Q54I90	101.3	Q54I90	92.8	Q54I90	89.9
Q869Z3	0.925	0.887	0.959	0.3259	0.150128	0.866709	Q869Z3	100	Q869Z3	92.5	Q869Z3	88.7
Q54X39	0.763	0.886	1.162	0.00244759	0.0189396	0.0897629	Q54X39	100	Q54X39	76.3	Q54X39	88.6
Q54K93	1.06	0.885	0.835	0.503621	0.354613	0.125587	Q54K93	100	Q54K93	106	Q54K93	88.5
Q54CQ1	1.01	0.884	0.876	0.999986	0.0179336	0.0601339	Q54CQ1	100	Q54CQ1	101	Q54CQ1	88.4
Q55GJ3	1.003	0.884	0.882	0.849373	0.0121272	0.068151	Q55GJ3	101.1	Q55GJ3	101.4	Q55GJ3	89.4
Q23883	0.92	0.883	0.96	0.567058	0.329494	0.914038	Q23883	100.8	Q23883	92.7	Q23883	89
Q54CZ2	0.913	0.882	0.965	0.315395	0.434457	0.960135	Q54CZ2	100.1	Q54CZ2	91.4	Q54CZ2	88.3
Q54EV4	0.97	0.88	0.907	0.309525	0.0026696	0.0488425	Q54EV4	101	Q54EV4	98	Q54EV4	88.8
Q54KM7	1.004	0.88	0.877	0.969037	0.00310983	0.0271643	Q54KM7	99.6	Q54KM7	99.9	Q54KM7	87.7
Q54T03	0.955	0.88	0.922	0.712316	0.0206435	0.105258	Q54T03	100	Q54T03	95.5	Q54T03	88
Q54J94	0.951	0.879	0.925	0.523768	0.144694	0.619249	Q54J94	99	Q54J94	94.1	Q54J94	87
Q54R89	0.899	0.879	0.978	0.292737	0.0873032	0.693694	Q54R89	102.5	Q54R89	92.1	Q54R89	90.1
Q551V0	0.919	0.879	0.956	0.205593	0.0169021	0.237218	Q551V0	99.1	Q551V0	91.2	Q551V0	87.2
Q55EM7	0.93	0.878	0.944	0.172675	0.00762445	0.134583	Q55EM7	100	Q55EM7	93	Q55EM7	87.8
Q54B68	0.84	0.876	1.042	0.0481403	0.0552779	0.974003	Q54B68	100	Q54B68	84	Q54B68	87.6
Q54CX6	0.803	0.873	1.088	0.0958973	0.164705	0.880198	Q54CX6	100.8	Q54CX6	80.9	Q54CX6	88
B0G189	0.89	0.872	0.98	0.0884151	0.0396633	0.885028	B0G189	100	B0G189	89	B0G189	87.2
Q54DG6	0.932	0.872	0.936	0.136584	0.00237502	0.0653837	Q54DG6	99.8	Q54DG6	93.1	Q54DG6	87.1
Q54RP2	0.944	0.871	0.923	0.0640017	0.00437709	0.161964	Q54RP2	99.3	Q54RP2	93.7	Q54RP2	86.5
Q54LM5	0.917	0.87	0.949	0.274388	0.187599	0.980372	Q54LM5	100	Q54LM5	91.7	Q54LM5	87
Q55CA5	0.938	0.869	0.926	0.81571	0.10493	0.281072	Q55CA5	102.8	Q55CA5	96.5	Q55CA5	89.3
Q54B42	0.955	0.868	0.909	0.386631	0.138252	0.756169	Q54B42	101.8	Q54B42	97.2	Q54B42	88.3
Q54QM0	0.897	0.866	0.966	0.165297	0.0345442	0.549024	Q54QM0	100	Q54QM0	89.7	Q54QM0	86.6
Q54X32	0.88	0.866	0.983	0.337807	0.422466	0.980372	Q54X32	100	Q54X32	88	Q54X32	86.6
Q54WE9	0.888	0.865	0.975	0.598789	0.110498	0.44294	Q54WE9	107.1	Q54WE9	95	Q54WE9	92.6
Q55E45	0.969	0.865	0.893	0.469753	0.00391131	0.0517015	Q55E45	97.1	Q55E45	94.1	Q55E45	84
Q550M3	1.013	0.864	0.853	0.999986	0.00256293	0.0219636	Q550M3	100	Q550M3	101.3	Q550M3	86.4
Q54JC1	0.897	0.863	0.962	0.261469	0.0155865	0.181104	Q54JC1	100.8	Q54JC1	90.4	Q54JC1	87
Q55CZ7	1.042	0.862	0.827	0.705114	0.014653	0.0345556	Q55CZ7	97.3	Q55CZ7	101.5	Q55CZ7	83.9
Q37312	0.763	0.861	1.128	0.205626	0.481738	0.753292	Q37312	100	Q37312	76.3	Q37312	86.1
Q54RV9	0.926	0.861	0.93	0.103723	0.00281073	0.0838694	Q54RV9	100	Q54RV9	92.6	Q54RV9	86.1
Q54Z42	0.935	0.861	0.921	0.103423	0.0359781	0.77917	Q54Z42	100.2	Q54Z42	93.7	Q54Z42	86.3
Q55FG0	0.922	0.861	0.934	0.583624	0.244318	0.782554	Q55FG0	104.5	Q55FG0	96.4	Q55FG0	90
Q34312	0.872	0.86	0.986	0.006423	0.00245386	0.860119	Q34312	100	Q34312	87.2	Q34312	86
Q553N9	0.953	0.859	0.902	0.771457	0.0926727	0.276628	Q553N9	100	Q553N9	95.3	Q553N9	85.9
Q54JL2	0.888	0.858	0.967	0.137817	0.063531	0.89074	Q54JL2	100	Q54JL2	88.8	Q54JL2	85.8
Q54NZ0	0.914	0.857	0.938	0.178137	0.025405	0.396718	Q54NZ0	101.4	Q54NZ0	92.8	Q54NZ0	87
Q54YT4	0.852	0.857	1.006	0.0313773	0.0111192	0.785499	Q54YT4	100	Q54YT4	85.2	Q54YT4	85.7
Q54E61	0.843	0.856	1.015	0.00538709	0.00432915	0.940915	Q54E61	101.8	Q54E61	85.8	Q54E61	87.1
Q54EE6	0.868	0.856	0.986	0.0333001	0.0094681	0.667811	Q54EE6	103.3	Q54EE6	89.7	Q54EE6	88.4
Q54RS0	0.876	0.854	0.975	0.180335	0.0540475	0.709533	Q54RS0	99.6	Q54RS0	87.3	Q54RS0	85.1
Q55AI5	0.781	0.854	1.093	0.239822	0.304158	0.978654	Q55AI5	100	Q55AI5	78.1	Q55AI5	85.4
Q54S91	0.883	0.852	0.965	0.202361	0.118236	0.955442	Q54S91	99.8	Q54S91	88.1	Q54S91	85
Q54K15	0.958	0.851	0.888	0.758514	0.0771488	0.244023	Q54K15	98.8	Q54K15	94.7	Q54K15	84.1
Q54H57	0.997	0.846	0.849	0.910022	0.35366	0.612101	Q54H57	100	Q54H57	99.7	Q54H57	84.6
Q54U71	0.886	0.846	0.954	0.31669	0.0720119	0.572763	Q54U71	96.2	Q54U71	85.3	Q54U71	81.4
Q8T1E2	0.909	0.846	0.931	0.686385	0.228225	0.653481	Q8T1E2	99.8	Q8T1E2	90.6	Q8T1E2	84.4
Q54L14	0.991	0.845	0.853	0.993413	0.504659	0.469365	Q54L14	100.1	Q54L14	99.2	Q54L14	84.6
Q55E85	0.926	0.845	0.912	0.116449	0.0161387	0.374857	Q55E85	101.5	Q55E85	94	Q55E85	85.7
Q54D52	0.868	0.842	0.97	0.4355	0.0885028	0.510389	Q54D52	101.2	Q54D52	87.9	Q54D52	85.3
Q54IF0	0.871	0.842	0.967	0.0463203	0.0432427	0.998435	Q54IF0	99.5	Q54IF0	86.7	Q54IF0	83.8
Q54UC6	0.906	0.841	0.928	0.178496	0.0488321	0.669149	Q54UC6	98.8	Q54UC6	89.6	Q54UC6	83.1
Q550W3	0.885	0.841	0.951	0.242605	0.146692	0.960034	Q550W3	101.6	Q550W3	89.9	Q550W3	85.5
Q55GN4	0.834	0.841	1.008	0.297902	0.416396	0.956859	Q55GN4	100	Q55GN4	83.4	Q55GN4	84.1
Q553P8	0.85	0.84	0.989	0.00723923	0.00419913	1	Q553P8	96.6	Q553P8	82.1	Q553P8	81.2
Q54HS2	1.029	0.839	0.815	0.967301	0.0535946	0.087582	Q54HS2	102.4	Q54HS2	105.3	Q54HS2	85.9
Q54PP3	0.845	0.838	0.992	0.0429793	0.0159953	0.80868	Q54PP3	100	Q54PP3	84.5	Q54PP3	83.8
Q95NZ8	0.894	0.838	0.937	0.00774609	0.00076233	0.121529	Q95NZ8	100	Q95NZ8	89.4	Q95NZ8	83.8
Q54F42	0.834	0.837	1.004	0.0191722	0.0128733	1	Q54F42	102.6	Q54F42	85.5	Q54F42	85.9
Q86IB7	0.894	0.836	0.934	0.0549128	0.00531236	0.225054	Q86IB7	100.6	Q86IB7	90	Q86IB7	84.1
Q54HY8	0.877	0.835	0.953	0.0426995	0.004256	0.219524	Q54HY8	103.9	Q54HY8	91.1	Q54HY8	86.8
Q54HU7	0.865	0.834	0.965	0.00474539	0.00084439	0.274844	Q54HU7	99.6	Q54HU7	86.1	Q54HU7	83.1
Q7KWR0	1.135	0.833	0.733	0.385818	0.424137	0.116903	Q7KWR0	101.4	Q7KWR0	115.2	Q7KWR0	84.5
Q54EE7	0.847	0.832	0.981	0.00292604	0.00065626	0.380013	Q54EE7	96.1	Q54EE7	81.5	Q54EE7	79.9
Q54DG1	0.868	0.829	0.955	0.402397	0.122267	0.683452	Q54DG1	100	Q54DG1	86.8	Q54DG1	82.9
Q555U7	0.905	0.829	0.916	0.176688	0.00941613	0.158515	Q555U7	103.5	Q555U7	93.7	Q555U7	85.8
Q54JT6	0.937	0.828	0.884	0.34403	0.0423909	0.345976	Q54JT6	100	Q54JT6	93.7	Q54JT6	82.8
Q54QG2	0.725	0.828	1.141	0.170479	0.188366	0.993861	Q54QG2	99.4	Q54QG2	72.1	Q54QG2	82.3
Q54SE2	1.018	0.828	0.814	0.999986	0.0314843	0.0803762	Q54SE2	100.4	Q54SE2	102.2	Q54SE2	83.2
Q54D67	0.91	0.827	0.909	0.534602	0.201898	0.751013	Q54D67	100	Q54D67	91	Q54D67	82.7
Q54QG4	0.896	0.827	0.923	0.101133	0.0042655	0.116009	Q54QG4	100	Q54QG4	89.6	Q54QG4	82.7
Q55C99	0.809	0.826	1.02	0.278613	0.128308	0.873953	Q55C99	98.6	Q55C99	79.8	Q55C99	81.4
Q86HC7	0.99	0.826	0.834	0.996232	0.672668	0.773235	Q86HC7	100	Q86HC7	99	Q86HC7	82.6
B0G112	0.883	0.825	0.935	0.00661521	0.00058203	0.0968069	B0G112	100	B0G112	88.3	B0G112	82.5
Q54E56	0.914	0.824	0.902	0.395793	0.0279835	0.210978	Q54E56	102.6	Q54E56	93.7	Q54E56	84.5
Q54J76	0.797	0.824	1.034	0.00029997	0.00017955	0.432885	Q54J76	100	Q54J76	79.7	Q54J76	82.4
Q54KG7	0.8	0.824	1.03	0.00673862	0.00464113	0.995629	Q54KG7	100	Q54KG7	80	Q54KG7	82.4
Q553K0	0.911	0.824	0.905	0.325864	0.0940952	0.674611	Q553K0	100.6	Q553K0	91.7	Q553K0	82.9
Q54KY1	0.754	0.823	1.092	0.0219951	0.0641751	0.549138	Q54KY1	100	Q54KY1	75.4	Q54KY1	82.3
Q76P42	0.9	0.823	0.915	0.167063	0.044948	0.663052	Q76P42	101.1	Q76P42	91	Q76P42	83.3
Q54HG7	0.773	0.822	1.063	0.0128203	0.00858371	1	Q54HG7	101.9	Q54HG7	78.7	Q54HG7	83.7
Q54N07	0.846	0.822	0.972	0.181842	0.042021	0.593219	Q54N07	99.4	Q54N07	84.1	Q54N07	81.7
Q54Q74	0.824	0.822	0.998	0.133316	0.0301899	0.583085	Q54Q74	100	Q54Q74	82.4	Q54Q74	82.2
Q55CR4	0.723	0.821	1.135	0.00557743	0.0327351	0.170684	Q55CR4	100	Q55CR4	72.3	Q55CR4	82.1
P0C8Z6	0.838	0.82	0.979	0.00120097	0.00039052	0.718816	P0C8Z6	98.8	P0C8Z6	82.8	P0C8Z6	81
Q54N28	0.869	0.82	0.944	0.0394379	0.00279343	0.147917	Q54N28	100	Q54N28	86.9	Q54N28	82
Q54ZA4	0.968	0.82	0.847	0.736933	0.0546429	0.193094	Q54ZA4	95.1	Q54ZA4	92	Q54ZA4	77.9
Q54XQ5	0.909	0.819	0.901	0.180864	0.00852287	0.144074	Q54XQ5	100	Q54XQ5	90.9	Q54XQ5	81.9
Q551W4	0.627	0.819	1.306	0.00168454	0.0154875	0.0640979	Q551W4	97.2	Q551W4	61	Q551W4	79.6
Q54HB2	0.711	0.818	1.15	0.185835	0.358484	0.844934	Q54HB2	101.6	Q54HB2	72.3	Q54HB2	83.1
Q550W5	0.885	0.818	0.924	0.0976188	0.0117486	0.318003	Q550W5	100	Q550W5	88.5	Q550W5	81.8
Q55D11	0.917	0.818	0.892	0.0165464	0.000744	0.06762	Q55D11	97.2	Q55D11	89.2	Q55D11	79.6
Q54F10	0.82	0.817	0.996	0.00139943	0.00039676	0.535762	Q54F10	99.4	Q54F10	81.5	Q54F10	81.2
Q55C71	0.787	0.817	1.039	0.0073261	0.00695469	0.907579	Q55C71	100	Q55C71	78.7	Q55C71	81.7
Q54JU0	0.818	0.816	0.997	0.0314846	0.0737241	0.685072	Q54JU0	110.4	Q54JU0	90.3	Q54JU0	90
Q55FL6	0.867	0.816	0.94	0.32051	0.105649	0.732552	Q55FL6	102.8	Q55FL6	89.2	Q55FL6	83.8
Q8I0H7	0.817	0.816	1	0.059038	0.0243043	0.851969	Q8I0H7	100	Q8I0H7	81.7	Q8I0H7	81.6
Q54KY9	0.897	0.814	0.907	0.68828	0.352878	0.841292	Q54KY9	100.8	Q54KY9	90.4	Q54KY9	82
Q55CN3	0.838	0.814	0.971	0.00225672	0.00079098	0.814441	Q55CN3	100	Q55CN3	83.8	Q55CN3	81.4
Q54EW4	0.827	0.813	0.983	0.0525471	0.0138372	0.635203	Q54EW4	99.1	Q54EW4	81.9	Q54EW4	80.5
Q54JI6	0.897	0.813	0.907	0.091776	0.00472035	0.135031	Q54JI6	97.3	Q54JI6	87.2	Q54JI6	79.1
Q55G92	0.786	0.809	1.029	0.0118162	0.00739735	1	Q55G92	100	Q55G92	78.6	Q55G92	80.9
Q54X43	0.939	0.808	0.861	0.190609	0.0114621	0.177231	Q54X43	93.2	Q54X43	87.5	Q54X43	75.3
Q54G34	0.941	0.807	0.857	0.116199	0.00146504	0.0480258	Q54G34	98.4	Q54G34	92.7	Q54G34	79.4
Q55E73	0.859	0.807	0.94	0.0910243	0.0461377	0.928047	Q55E73	101.3	Q55E73	87	Q55E73	81.8
Q54P95	0.805	0.805	0.999	0.019171	0.00550205	0.664564	Q54P95	94.5	Q54P95	76.1	Q54P95	76
Q54ZD0	1.045	0.805	0.77	0.913736	0.0359283	0.0665759	Q54ZD0	93	Q54ZD0	97.2	Q54ZD0	74.9
Q1ZXG5	0.839	0.804	0.958	0.0285358	0.0111999	0.837277	Q1ZXG5	100.3	Q1ZXG5	84.1	Q1ZXG5	80.6
Q54RT6	1.088	0.802	0.738	0.992444	0.0153924	0.0517129	Q54RT6	100	Q54RT6	108.8	Q54RT6	80.2
Q54VM8	0.848	0.801	0.944	0.241614	0.0352131	0.40697	Q54VM8	104.6	Q54VM8	88.7	Q54VM8	83.7
Q557I2	0.894	0.801	0.896	0.379483	0.203908	0.91266	Q557I2	100.2	Q557I2	89.6	Q557I2	80.3
Q9GSE7	0.86	0.801	0.931	0.165557	0.0334056	0.533721	Q9GSE7	90.5	Q9GSE7	77.9	Q9GSE7	72.5
Q54P99	0.956	0.8	0.837	0.418723	0.0311806	0.219433	Q54P99	99.2	Q54P99	94.8	Q54P99	79.3
Q869S7	0.651	0.799	1.228	0.0458518	0.0740641	0.87231	Q869S7	100	Q869S7	65.1	Q869S7	79.9
Q55DB5	1.016	0.798	0.785	0.955138	0.224943	0.377649	Q55DB5	100	Q55DB5	101.6	Q55DB5	79.8
P0C7W5	0.949	0.797	0.84	0.236679	0.00230239	0.0498287	P0C7W5	98.1	P0C7W5	93.1	P0C7W5	78.2
Q86KA1	0.754	0.797	1.057	0.0194613	0.00986856	0.95463	Q86KA1	100	Q86KA1	75.4	Q86KA1	79.7
Q54YA9	0.757	0.796	1.052	0.00654927	0.00643509	0.875873	Q54YA9	100	Q54YA9	75.7	Q54YA9	79.6
Q75JG3	0.785	0.796	1.014	0.00064386	0.00038088	0.736392	Q75JG3	99.4	Q75JG3	78	Q75JG3	79.1
Q86L21	0.739	0.796	1.077	0.00691472	0.00799769	0.798711	Q86L21	102.4	Q86L21	75.7	Q86L21	81.6
Q54L87	0.855	0.795	0.929	0.504472	0.189645	0.755578	Q54L87	100	Q54L87	85.5	Q54L87	79.5
Q54DX7	0.914	0.794	0.869	0.369126	0.00781665	0.089586	Q54DX7	100	Q54DX7	91.4	Q54DX7	79.4
Q54RB8	2.408	0.794	0.33	0.0241058	0.977375	0.0540539	Q54RB8	100	Q54RB8	240.8	Q54RB8	79.4
Q75K12	0.821	0.794	0.968	0.0727393	0.0339661	0.90068	Q75K12	99.9	Q75K12	82	Q75K12	79.3
P34093	0.691	0.793	1.148	0.00672976	0.0212809	0.324123	P34093	98.2	P34093	67.9	P34093	77.9
Q1ZXF1	0.827	0.793	0.959	0.0179906	0.00378817	0.475981	Q1ZXF1	103.3	Q1ZXF1	85.4	Q1ZXF1	81.9
Q54DF5	0.888	0.793	0.893	0.444763	0.0256039	0.177264	Q54DF5	100	Q54DF5	88.8	Q54DF5	79.3
Q54I63	0.836	0.793	0.949	0.0036413	0.00178943	0.995966	Q54I63	100	Q54I63	83.6	Q54I63	79.3
Q54YM4	0.624	0.792	1.269	0.0047693	0.0165619	0.240405	Q54YM4	101.6	Q54YM4	63.4	Q54YM4	80.5
Q54JV7	0.87	0.791	0.909	0.0599109	0.00778027	0.319373	Q54JV7	100	Q54JV7	87	Q54JV7	79.1
Q54UP1	0.874	0.791	0.905	0.132	0.0199891	0.412563	Q54UP1	100.9	Q54UP1	88.2	Q54UP1	79.8
Q54FU9	0.967	0.79	0.817	0.933787	0.0844955	0.1829	Q54FU9	91.9	Q54FU9	88.8	Q54FU9	72.6
Q54VA2	0.704	0.79	1.122	0.015006	0.0337125	0.60166	Q54VA2	98.4	Q54VA2	69.2	Q54VA2	77.7
Q54CD3	0.986	0.789	0.801	0.84489	0.00728388	0.0518015	Q54CD3	100	Q54CD3	98.6	Q54CD3	78.9
Q54QF9	0.691	0.789	1.142	0.0320914	0.0411876	0.928871	Q54QF9	95	Q54QF9	65.6	Q54QF9	75
Q54NN6	0.845	0.788	0.933	0.0458734	0.00546107	0.274021	Q54NN6	98.9	Q54NN6	83.6	Q54NN6	78
Q54VB8	0.766	0.788	1.029	0.00595578	0.00578138	0.86664	Q54VB8	101.3	Q54VB8	77.6	Q54VB8	79.8
Q559H1	0.815	0.788	0.967	0.0216218	0.00790086	0.803897	Q559H1	100.8	Q559H1	82.2	Q559H1	79.4
Q55G50	0.914	0.788	0.863	0.335128	0.0197665	0.181262	Q55G50	100	Q55G50	91.4	Q55G50	78.8
Q54LD3	0.779	0.787	1.01	0.0173088	0.00820747	0.934589	Q54LD3	100.7	Q54LD3	78.4	Q54LD3	79.2
Q54M99	0.91	0.785	0.862	0.833734	0.147257	0.359029	Q54M99	96	Q54M99	87.4	Q54M99	75.3
Q554U7	0.782	0.785	1.005	0.0105529	0.00375228	0.8077	Q554U7	101	Q554U7	78.9	Q554U7	79.3
Q76NT0	0.776	0.784	1.01	0.00178712	0.00101186	0.974176	Q76NT0	100	Q76NT0	77.6	Q76NT0	78.4
Q54KI1	0.891	0.783	0.879	0.35255	0.00779016	0.091276	Q54KI1	100	Q54KI1	89.1	Q54KI1	78.3
Q553V1	0.776	0.783	1.009	0.137298	0.022638	0.446723	Q553V1	100.6	Q553V1	78.1	Q553V1	78.8
Q54GF3	0.899	0.782	0.869	0.384651	0.0182975	0.154306	Q54GF3	99.4	Q54GF3	89.4	Q54GF3	77.7
Q54H24	0.901	0.777	0.863	0.157756	0.0114827	0.205772	Q54H24	99.8	Q54H24	89.9	Q54H24	77.6
Q55DJ4	0.795	0.777	0.977	0.219875	0.205421	1	Q55DJ4	100.1	Q55DJ4	79.6	Q55DJ4	77.8
P0C7B6	0.938	0.776	0.827	0.156205	0.00217869	0.0571768	P0C7B6	100	P0C7B6	93.8	P0C7B6	77.6
Q54XQ3	0.791	0.776	0.982	0.00303185	0.00086219	0.606809	Q54XQ3	100	Q54XQ3	79.1	Q54XQ3	77.6
Q75JQ5	0.994	0.776	0.781	0.999986	0.323632	0.392288	Q75JQ5	98.1	Q75JQ5	97.5	Q75JQ5	76.1
Q54BW1	0.791	0.772	0.975	0.0749307	0.030569	0.847148	Q54BW1	105.4	Q54BW1	83.4	Q54BW1	81.4
Q54JK2	0.802	0.771	0.961	0.00048118	0.00013828	0.324173	Q54JK2	100	Q54JK2	80.2	Q54JK2	77.1
Q54PI8	0.879	0.771	0.877	0.0152121	0.00052953	0.0479194	Q54PI8	100	Q54PI8	87.9	Q54PI8	77.1
Q55BM7	0.837	0.771	0.922	0.00845088	0.00095624	0.155433	Q55BM7	100	Q55BM7	83.7	Q55BM7	77.1
Q86IZ2	0.795	0.771	0.971	0.00117622	0.00028741	0.335111	Q86IZ2	100	Q86IZ2	79.5	Q86IZ2	77.1
B0G117	0.923	0.769	0.833	0.372797	0.00315385	0.0503777	B0G117	100	B0G117	92.3	B0G117	76.9
Q54PM3	0.821	0.769	0.936	0.0196519	0.00409027	0.473146	Q54PM3	100.4	Q54PM3	82.4	Q54PM3	77.2
Q557D9	0.811	0.769	0.949	0.0313773	0.00587819	0.440166	Q557D9	100	Q557D9	81.1	Q557D9	76.9
Q54WD9	0.814	0.768	0.944	0.00114016	0.00025589	0.239518	Q54WD9	102.7	Q54WD9	83.6	Q54WD9	78.9
O76740	0.927	0.767	0.828	0.256365	0.0187381	0.216488	O76740	98	O76740	90.8	O76740	75.1
Q54MZ7	0.787	0.766	0.974	0.0758286	0.0259481	0.769901	Q54MZ7	100	Q54MZ7	78.7	Q54MZ7	76.6
Q54X18	0.835	0.766	0.917	0.0799463	0.0232743	0.692191	Q54X18	105.2	Q54X18	87.9	Q54X18	80.7
Q55GH8	0.814	0.766	0.941	0.00702665	0.00109488	0.244023	Q55GH8	99.8	Q55GH8	81.2	Q55GH8	76.4
Q55BQ4	0.891	0.765	0.859	0.0927157	0.0165388	0.467126	Q55BQ4	97.4	Q55BQ4	86.8	Q55BQ4	74.5
Q54KY0	0.909	0.763	0.839	0.0228016	0.00020937	0.012313	Q54KY0	101	Q54KY0	91.8	Q54KY0	77.1
P34136	0.807	0.762	0.945	0.0197531	0.00143824	0.122234	P34136	99.5	P34136	80.3	P34136	75.9
Q54VU7	0.726	0.762	1.05	0.00029997	0.0002073	0.248486	Q54VU7	100	Q54VU7	72.6	Q54VU7	76.2
Q23887	0.709	0.761	1.073	0.00985215	0.0104025	0.890986	Q23887	100	Q23887	70.9	Q23887	76.1
Q54LP4	0.739	0.761	1.031	0.0159435	0.0103284	1	Q54LP4	99.7	Q54LP4	73.6	Q54LP4	75.9
O21043	0.678	0.76	1.121	0.00264612	0.00327319	0.513606	O21043	100	O21043	67.8	O21043	76
Q54I88	0.782	0.76	0.973	0.00155852	0.00043072	0.517777	Q54I88	100	Q54I88	78.2	Q54I88	76
Q54QN2	0.948	0.76	0.802	0.275632	0.00250451	0.0494422	Q54QN2	101	Q54QN2	95.8	Q54QN2	76.8
Q75JK9	0.787	0.759	0.965	0.00092273	0.00020427	0.194279	Q75JK9	100	Q75JK9	78.7	Q75JK9	75.9
Q54GJ7	0.764	0.757	0.99	0.00067621	0.00021223	0.56188	Q54GJ7	100	Q54GJ7	76.4	Q54GJ7	75.7
Q54SI5	1.068	0.754	0.706	0.970435	0.424555	0.351886	Q54SI5	100	Q54SI5	106.8	Q54SI5	75.4
Q8T2J9	0.69	0.751	1.087	0.127096	0.105851	1	Q8T2J9	100	Q8T2J9	69	Q8T2J9	75.1
Q54Q67	0.692	0.75	1.084	0.00122639	0.00220881	0.158378	Q54Q67	101.8	Q54Q67	70.4	Q54Q67	76.4
Q55C48	0.891	0.75	0.842	0.30932	0.00492298	0.0735545	Q55C48	100	Q55C48	89.1	Q55C48	75
Q555D9	0.827	0.748	0.904	0.0603368	0.00525335	0.204654	Q555D9	99.4	Q555D9	82.3	Q555D9	74.4
Q55F21	0.716	0.748	1.045	0.00816972	0.00377535	0.951215	Q55F21	102.7	Q55F21	73.6	Q55F21	76.9
Q86H28	0.69	0.747	1.082	0.0213616	0.0376444	0.76733	Q86H28	100	Q86H28	69	Q86H28	74.7
Q8T9W2	0.819	0.745	0.909	0.00796346	0.00136638	0.306301	Q8T9W2	98.1	Q8T9W2	80.4	Q8T9W2	73.1
Q54D65	0.996	0.744	0.747	0.956707	0.00397844	0.0318812	Q54D65	100.3	Q54D65	100	Q54D65	74.7
Q75JR2	0.681	0.744	1.093	0.00169075	0.00113707	0.848157	Q75JR2	100.7	Q75JR2	68.6	Q75JR2	75
Q54J68	0.787	0.742	0.943	0.293232	0.0633679	0.55554	Q54J68	100	Q54J68	78.7	Q54J68	74.2
Q55EJ5	0.92	0.741	0.805	0.505751	0.00417912	0.0519122	Q55EJ5	98.9	Q55EJ5	91	Q55EJ5	73.3
Q54F94	0.841	0.739	0.878	0.0439436	0.00263127	0.128193	Q54F94	101.4	Q54F94	85.3	Q54F94	74.9
Q869N1	0.614	0.739	1.204	0.00208874	0.0033698	0.306043	Q869N1	101	Q869N1	62.1	Q869N1	74.7
Q54N93	0.844	0.735	0.87	0.061904	0.00273795	0.107034	Q54N93	98.8	Q54N93	83.4	Q54N93	72.6
Q54EW1	0.932	0.731	0.784	0.325684	0.0016723	0.0337361	Q54EW1	101	Q54EW1	94.1	Q54EW1	73.8
Q55GI5	0.766	0.731	0.955	0.0152866	0.00541129	0.792469	Q55GI5	100	Q55GI5	76.6	Q55GI5	73.1
Q8MP20	0.766	0.73	0.953	0.00020992	6.0188e-05	0.220362	Q8MP20	100	Q8MP20	76.6	Q8MP20	73
Q54NR3	0.769	0.728	0.947	0.00213072	0.00048053	0.337369	Q54NR3	100	Q54NR3	76.9	Q54NR3	72.8
Q54IN6	0.953	0.727	0.763	0.40413	0.0102913	0.100802	Q54IN6	100.4	Q54IN6	95.7	Q54IN6	73
Q55BK8	0.966	0.727	0.753	0.529229	0.00890501	0.0791419	Q55BK8	100	Q55BK8	96.6	Q55BK8	72.7
Q54TR5	0.789	0.725	0.919	0.00092945	0.00014074	0.0701244	Q54TR5	100	Q54TR5	78.9	Q54TR5	72.5
Q54WI6	0.798	0.725	0.908	0.0437424	0.00720397	0.396718	Q54WI6	100	Q54WI6	79.8	Q54WI6	72.5
Q54LV3	0.789	0.724	0.917	0.00315238	0.00042991	0.130249	Q54LV3	100.3	Q54LV3	79.1	Q54LV3	72.6
Q54PY7	0.767	0.724	0.943	0.00132202	0.00036541	0.494482	Q54PY7	99.7	Q54PY7	76.5	Q54PY7	72.2
Q55CK8	0.886	0.724	0.817	0.188941	0.0011994	0.0327499	Q55CK8	99.3	Q55CK8	88	Q55CK8	71.9
Q550C8	0.762	0.723	0.948	0.0281392	0.0153085	0.964108	Q550C8	103.4	Q550C8	78.8	Q550C8	74.7
Q55C31	0.775	0.722	0.932	0.0441124	0.00779016	0.428679	Q55C31	102.7	Q55C31	79.5	Q55C31	74.1
Q54CV4	0.653	0.715	1.096	0.0204075	0.0122129	0.98985	Q54CV4	98.7	Q54CV4	64.4	Q54CV4	70.6
Q54FV8	0.823	0.713	0.867	0.0315998	0.002957	0.188516	Q54FV8	98.7	Q54FV8	81.2	Q54FV8	70.4
Q54Y94	0.748	0.713	0.954	0.00345007	0.00074504	0.366504	Q54Y94	103.5	Q54Y94	77.4	Q54Y94	73.8
Q556U7	0.801	0.713	0.89	0.0202352	0.00188357	0.16599	Q556U7	98.9	Q556U7	79.3	Q556U7	70.5
Q54QJ9	0.732	0.712	0.972	0.0002344	8.0467e-05	0.68849	Q54QJ9	97.6	Q54QJ9	71.5	Q54QJ9	69.4
Q54XM2	0.837	0.712	0.85	0.060711	0.00513155	0.198634	Q54XM2	100.6	Q54XM2	84.2	Q54XM2	71.6
O21033	0.687	0.711	1.034	0.0200202	0.0151515	1	O21033	101.2	O21033	69.5	O21033	71.9
Q86H49	0.805	0.709	0.881	0.0211784	0.00090263	0.0716239	Q86H49	97.8	Q86H49	78.7	Q86H49	69.4
Q54ZW4	0.709	0.708	0.998	0.00190397	0.00083125	0.983865	Q54ZW4	97.6	Q54ZW4	69.2	Q54ZW4	69.1
Q55BJ9	0.74	0.708	0.956	0.0118338	0.00936145	0.99187	Q55BJ9	100	Q55BJ9	74	Q55BJ9	70.8
Q55GS6	0.628	0.708	1.127	0.0116444	0.0174288	0.74957	Q55GS6	98.8	Q55GS6	62	Q55GS6	69.9
Q55EN1	0.76	0.707	0.93	0.0114842	0.00119529	0.157988	Q55EN1	99.4	Q55EN1	75.5	Q55EN1	70.2
Q54DY9	0.788	0.705	0.895	0.00519199	0.00075568	0.189485	Q54DY9	104.6	Q54DY9	82.4	Q54DY9	73.7
Q54ET5	0.678	0.705	1.04	0.00155778	0.00061205	0.93809	Q54ET5	99.4	Q54ET5	67.4	Q54ET5	70.1
Q54IW8	0.845	0.705	0.835	0.0979541	0.00610656	0.163338	Q54IW8	100	Q54IW8	84.5	Q54IW8	70.5
Q55BM0	0.628	0.704	1.12	0.0362081	0.0239319	0.994307	Q55BM0	103.4	Q55BM0	64.9	Q55BM0	72.7
C7G039	0.843	0.703	0.834	0.0397966	0.00431813	0.23936	C7G039	100.9	C7G039	85	C7G039	70.9
Q54CW7	0.833	0.703	0.844	0.0698566	0.0123944	0.451803	Q54CW7	98.4	Q54CW7	82	Q54CW7	69.2
Q54E22	0.667	0.703	1.054	0.0467394	0.0513808	0.980147	Q54E22	100	Q54E22	66.7	Q54E22	70.3
Q54L63	0.644	0.702	1.091	0.00303376	0.0018815	0.979303	Q54L63	100.5	Q54L63	64.7	Q54L63	70.6
Q54GI9	0.737	0.701	0.95	0.0061282	0.00074987	0.152407	Q54GI9	101	Q54GI9	74.5	Q54GI9	70.8
Q554Z5	0.656	0.701	1.068	0.00040231	0.00024859	0.5251	Q554Z5	100	Q554Z5	65.6	Q554Z5	70.1
Q55D12	0.73	0.701	0.961	0.00375212	0.0009785	0.539028	Q55D12	101.2	Q55D12	73.9	Q55D12	71
Q54WC5	0.674	0.7	1.04	0.0410811	0.0202992	0.928047	Q54WC5	97.3	Q54WC5	65.5	Q54WC5	68.1
Q1ZXK7	0.788	0.698	0.885	0.0164247	0.00080125	0.0738047	Q1ZXK7	97.8	Q1ZXK7	77.1	Q1ZXK7	68.2
Q54N05	0.808	0.695	0.86	0.0490687	0.00149497	0.0734646	Q54N05	100	Q54N05	80.8	Q54N05	69.5
Q55CJ1	0.722	0.695	0.963	0.00517834	0.00104713	0.357915	Q55CJ1	100	Q55CJ1	72.2	Q55CJ1	69.5
Q54X21	0.736	0.694	0.943	0.00105139	0.0002588	0.308928	Q54X21	99	Q54X21	72.8	Q54X21	68.7
Q54CL7	0.779	0.693	0.89	0.0158366	0.00115785	0.11183	Q54CL7	102.2	Q54CL7	79.6	Q54CL7	70.8
Q54XR1	0.941	0.69	0.733	0.571202	0.0066649	0.0641569	Q54XR1	100	Q54XR1	94.1	Q54XR1	69
Q55ER8	0.687	0.689	1.002	0.00048247	0.00017745	0.803897	Q55ER8	98.5	Q55ER8	67.7	Q55ER8	67.9
Q552L1	0.766	0.687	0.896	0.00762398	0.00109816	0.219198	Q552L1	100	Q552L1	76.6	Q552L1	68.7
Q553T7	0.817	0.687	0.84	0.0565444	0.00487197	0.199743	Q553T7	100	Q553T7	81.7	Q553T7	68.7
Q9U1M9	0.901	0.687	0.763	0.74408	0.0449237	0.166003	Q9U1M9	98.6	Q9U1M9	88.8	Q9U1M9	67.8
Q54HD3	0.676	0.686	1.015	0.00316405	0.00114952	0.844934	Q54HD3	100	Q54HD3	67.6	Q54HD3	68.6
Q54HM4	0.75	0.684	0.912	0.0170743	0.0033658	0.437662	Q54HM4	100	Q54HM4	75	Q54HM4	68.4
Q55CY6	0.675	0.681	1.01	0.0023772	0.00163125	0.902433	Q55CY6	93.8	Q55CY6	63.3	Q55CY6	63.9
Q55G83	0.736	0.681	0.925	0.00341701	0.0004395	0.123059	Q55G83	103.4	Q55G83	76.1	Q55G83	70.4
Q54T58	0.774	0.68	0.879	0.00462933	0.00052967	0.118602	Q54T58	100	Q54T58	77.4	Q54T58	68
Q54II4	0.803	0.679	0.845	0.258596	0.0206481	0.234217	Q54II4	103.8	Q54II4	83.4	Q54II4	70.5
Q86L04	0.699	0.679	0.972	0.00144291	0.00042328	0.58429	Q86L04	100.6	Q86L04	70.2	Q86L04	68.2
Q54JK1	0.702	0.678	0.965	0.00023343	7.7794e-05	0.601776	Q54JK1	99.4	Q54JK1	69.8	Q54JK1	67.4
Q54W39	0.629	0.678	1.078	0.00199289	0.00139599	0.850649	Q54W39	101.7	Q54W39	63.9	Q54W39	68.9
Q55D22	0.905	0.677	0.747	0.541887	0.0708019	0.342089	Q55D22	116.5	Q55D22	105.5	Q55D22	78.8
Q54N47	0.573	0.676	1.181	0.0486365	0.057483	0.968126	Q54N47	100	Q54N47	57.3	Q54N47	67.6
Q555U6	0.8	0.675	0.843	0.0445508	0.00210433	0.103385	Q555U6	102.2	Q555U6	81.7	Q555U6	68.9
Q552P9	0.827	0.674	0.814	0.0169112	0.0006399	0.0556505	Q552P9	97.5	Q552P9	80.7	Q552P9	65.7
Q54IC8	0.779	0.673	0.864	0.0249204	0.00531741	0.495907	Q54IC8	104.3	Q54IC8	81.2	Q54IC8	70.2
Q55BF4	0.788	0.673	0.853	0.00759331	0.00083636	0.142794	Q55BF4	100	Q55BF4	78.8	Q55BF4	67.3
Q54Z70	0.672	0.672	1	0.00353627	0.00171332	0.99455	Q54Z70	100.9	Q54Z70	67.8	Q54Z70	67.8
Q55GI2	0.679	0.672	0.989	0.00288896	0.00143452	1	Q55GI2	99.5	Q55GI2	67.6	Q55GI2	66.8
Q555C8	0.731	0.67	0.915	0.0035104	0.00050631	0.155924	Q555C8	99.7	Q555C8	72.9	Q555C8	66.7
Q54EU1	0.819	0.668	0.815	0.179727	0.0170165	0.268423	Q54EU1	98.5	Q54EU1	80.6	Q54EU1	65.8
Q34313	0.608	0.667	1.096	0.0373572	0.028802	1	Q34313	93.2	Q34313	56.7	Q34313	62.1
Q54FN9	0.674	0.667	0.99	0.360083	0.0811022	0.56389	Q54FN9	101.3	Q54FN9	68.3	Q54FN9	67.6
Q54W51	0.699	0.667	0.955	0.00105728	0.00027037	0.355154	Q54W51	99.1	Q54W51	69.2	Q54W51	66.1
Q550P4	0.746	0.667	0.894	0.00720597	0.00154022	0.430915	Q550P4	100	Q550P4	74.6	Q550P4	66.7
Q54SV6	0.722	0.666	0.923	0.00107413	0.0002015	0.132171	Q54SV6	97.6	Q54SV6	70.4	Q54SV6	65
Q54XD9	0.769	0.664	0.864	0.0250838	0.00964092	0.828782	Q54XD9	96	Q54XD9	73.8	Q54XD9	63.7
Q54JR3	0.685	0.663	0.968	0.010736	0.00700364	1	Q54JR3	95.8	Q54JR3	65.6	Q54JR3	63.5
Q54KB7	0.574	0.663	1.155	0.057865	0.0438578	1	Q54KB7	103.7	Q54KB7	59.5	Q54KB7	68.7
Q54KV4	0.734	0.662	0.902	0.00096536	0.00013798	0.0629728	Q54KV4	100.6	Q54KV4	73.8	Q54KV4	66.6
Q54PL9	0.778	0.662	0.851	0.0635094	0.0212938	0.758414	Q54PL9	100	Q54PL9	77.8	Q54PL9	66.2
Q75JQ7	0.708	0.662	0.935	0.0001731	4.337e-05	0.0758375	Q75JQ7	99.3	Q75JQ7	70.3	Q75JQ7	65.7
Q54JT0	0.805	0.661	0.821	0.0675036	0.00174396	0.0713368	Q54JT0	104.5	Q54JT0	84.1	Q54JT0	69.1
Q54L16	0.849	0.66	0.778	0.159946	0.0131349	0.23093	Q54L16	104.4	Q54L16	88.6	Q54L16	68.9
Q75JQ8	0.774	0.66	0.854	0.00204404	0.00024275	0.0758644	Q75JQ8	100	Q75JQ8	77.4	Q75JQ8	66
Q54C45	0.603	0.658	1.091	0.00629172	0.00302443	0.974285	Q54C45	99.6	Q54C45	60	Q54C45	65.5
Q869N8	0.64	0.658	1.028	0.00280427	0.0012424	0.978153	Q869N8	100	Q869N8	64	Q869N8	65.8
Q54F37	0.738	0.657	0.89	0.0009998	0.00017385	0.102931	Q54F37	100	Q54F37	73.8	Q54F37	65.7
Q54GH8	0.73	0.657	0.9	0.070773	0.0166592	0.585507	Q54GH8	103.8	Q54GH8	75.8	Q54GH8	68.2
Q55A06	0.747	0.657	0.88	0.00184886	0.0002877	0.124478	Q55A06	102.2	Q55A06	76.4	Q55A06	67.2
Q55ES5	0.68	0.655	0.962	0.0036413	0.00111515	0.689218	Q55ES5	108.5	Q55ES5	73.8	Q55ES5	71
Q54BU5	0.686	0.652	0.951	0.00340031	0.00074062	0.370217	Q54BU5	100	Q54BU5	68.6	Q54BU5	65.2
Q54HH1	0.781	0.652	0.836	0.010736	0.00099658	0.13061	Q54HH1	100.2	Q54HH1	78.2	Q54HH1	65.3
Q54U47	0.52	0.65	1.251	0.213633	0.141221	0.979274	Q54U47	99.9	Q54U47	51.9	Q54U47	64.9
Q8WSV6	0.83	0.65	0.784	0.224121	0.0444739	0.525771	Q8WSV6	99.9	Q8WSV6	82.9	Q8WSV6	65
Q55FI3	0.684	0.649	0.949	0.00045541	9.8118e-05	0.101348	Q55FI3	100	Q55FI3	68.4	Q55FI3	64.9
Q54I58	0.441	0.646	1.464	0.0270926	0.0743489	0.599497	Q54I58	82.7	Q54I58	36.5	Q54I58	53.5
Q9GPZ7	0.774	0.646	0.835	0.0189834	0.00111065	0.0945461	Q9GPZ7	101.1	Q9GPZ7	78.2	Q9GPZ7	65.3
Q869Z4	0.626	0.645	1.03	0.00382854	0.00134367	0.817256	Q869Z4	98.7	Q869Z4	61.8	Q869Z4	63.6
Q54BN1	0.74	0.644	0.871	0.0039196	0.0007239	0.273056	Q54BN1	100.9	Q54BN1	74.7	Q54BN1	65
Q54D03	0.868	0.643	0.74	0.62548	0.0321605	0.156315	Q54D03	100	Q54D03	86.8	Q54D03	64.3
Q86HC3	0.613	0.643	1.048	0.0082525	0.0038634	0.955373	Q86HC3	100	Q86HC3	61.3	Q86HC3	64.3
Q559Z1	0.693	0.642	0.927	0.00181666	0.00033862	0.186063	Q559Z1	101.9	Q559Z1	70.6	Q559Z1	65.4
Q54T08	0.716	0.641	0.895	0.0670325	0.00692139	0.251527	Q54T08	100	Q54T08	71.6	Q54T08	64.1
Q551D9	0.777	0.64	0.824	0.0116	0.00042853	0.0431047	Q551D9	100	Q551D9	77.7	Q551D9	64
Q54B71	0.643	0.637	0.992	0.00085286	0.00033824	0.954159	Q54B71	100	Q54B71	64.3	Q54B71	63.7
Q551Y3	0.627	0.637	1.015	0.0131333	0.00496198	0.832506	Q551Y3	103.3	Q551Y3	64.8	Q551Y3	65.8
Q552R4	0.782	0.637	0.814	0.059163	0.00339778	0.133929	Q552R4	103.4	Q552R4	80.8	Q552R4	65.8
Q86A68	0.675	0.637	0.943	0.00053887	0.00013289	0.178579	Q86A68	100.5	Q86A68	67.8	Q86A68	64
Q559P3	0.798	0.635	0.796	0.00396854	0.00028935	0.0541899	Q559P3	100	Q559P3	79.8	Q559P3	63.5
Q55BE1	0.68	0.635	0.934	0.00021741	5.0947e-05	0.0863954	Q55BE1	102.8	Q55BE1	69.9	Q55BE1	65.3
Q86AD9	0.535	0.634	1.185	0.0255219	0.028273	0.958804	Q86AD9	100.7	Q86AD9	53.9	Q86AD9	63.9
Q86HS0	0.705	0.634	0.899	0.00117731	0.00024191	0.183607	Q86HS0	100	Q86HS0	70.5	Q86HS0	63.4
B0G178	0.671	0.633	0.944	0.00023115	6.6377e-05	0.238208	B0G178	102	B0G178	68.4	B0G178	64.6
Q54IQ1	0.599	0.633	1.057	0.0910277	0.0373421	0.849599	Q54IQ1	100	Q54IQ1	59.9	Q54IQ1	63.3
Q552K6	0.748	0.633	0.846	0.0445005	0.00157054	0.0796363	Q552K6	102.5	Q552K6	76.7	Q552K6	64.9
Q55GN7	0.623	0.632	1.014	0.00019776	7.388e-05	0.995629	Q55GN7	103.7	Q55GN7	64.6	Q55GN7	65.5
Q54GQ0	0.652	0.628	0.963	0.00048254	0.00016957	0.70738	Q54GQ0	97.2	Q54GQ0	63.4	Q54GQ0	61
Q54YK4	0.693	0.628	0.906	0.00079652	0.0001879	0.211923	Q54YK4	91.5	Q54YK4	63.4	Q54YK4	57.4
Q54KE6	0.611	0.627	1.026	0.0135033	0.00493103	0.811775	Q54KE6	101.9	Q54KE6	62.3	Q54KE6	63.9
Q554U6	0.76	0.625	0.822	0.0219461	0.00283162	0.257957	Q554U6	99.1	Q554U6	75.3	Q554U6	61.9
Q54YU4	0.757	0.624	0.824	0.0056147	0.00025423	0.0327615	Q54YU4	100	Q54YU4	75.7	Q54YU4	62.4
Q55C00	0.654	0.622	0.951	0.0241222	0.0277813	0.94481	Q55C00	91.8	Q55C00	60	Q55C00	57.1
Q54CE4	0.621	0.621	0.999	0.0136829	0.00331195	0.549505	Q54CE4	99.5	Q54CE4	61.8	Q54CE4	61.8
Q54XE3	0.652	0.621	0.953	0.0120542	0.00644264	0.981306	Q54XE3	104.2	Q54XE3	68	Q54XE3	64.8
Q37315	0.526	0.62	1.179	0.00713838	0.0110543	0.646304	Q37315	118.1	Q37315	62.2	Q37315	73.3
Q54MY0	0.777	0.619	0.797	0.00734691	0.00041574	0.0559095	Q54MY0	100	Q54MY0	77.7	Q54MY0	61.9
Q86A90	0.537	0.619	1.152	0.0246442	0.0170254	1	Q86A90	100.8	Q86A90	54.1	Q86A90	62.4
Q54RR5	0.531	0.617	1.162	0.0476284	0.0287644	0.979106	Q54RR5	100	Q54RR5	53.1	Q54RR5	61.7
Q54WC6	0.602	0.616	1.023	0.0217656	0.00571957	0.612101	Q54WC6	100	Q54WC6	60.2	Q54WC6	61.6
Q54VR5	0.619	0.614	0.992	0.00214315	0.00118878	0.992205	Q54VR5	97.5	Q54VR5	60.4	Q54VR5	59.9
Q54P40	0.596	0.613	1.029	0.0268955	0.00791363	0.682212	Q54P40	100	Q54P40	59.6	Q54P40	61.3
Q54WM5	0.735	0.609	0.828	0.0143054	0.00167391	0.201055	Q54WM5	100.1	Q54WM5	73.6	Q54WM5	61
Q54K91	0.647	0.608	0.939	0.0067629	0.00121877	0.315762	Q54K91	100	Q54K91	64.7	Q54K91	60.8
Q54FD7	0.564	0.607	1.075	0.0567764	0.025104	0.882653	Q54FD7	99.1	Q54FD7	55.9	Q54FD7	60.2
Q54S83	0.583	0.607	1.041	0.0770574	0.0218456	0.679527	Q54S83	98.6	Q54S83	57.5	Q54S83	59.9
Q8T133	0.638	0.607	0.952	0.00037704	9.3003e-05	0.143471	Q8T133	100	Q8T133	63.8	Q8T133	60.7
Q54SX4	0.639	0.606	0.948	0.00059602	0.00017307	0.403607	Q54SX4	103.2	Q54SX4	65.9	Q54SX4	62.5
Q54B22	0.737	0.605	0.821	0.0897149	0.0091644	0.264257	Q54B22	76.8	Q54B22	56.6	Q54B22	46.5
Q54G50	0.724	0.605	0.836	0.183433	0.0785125	0.85776	Q54G50	100	Q54G50	72.4	Q54G50	60.5
Q54DD3	0.57	0.604	1.061	0.00752544	0.00320509	0.916357	Q54DD3	101	Q54DD3	57.5	Q54DD3	61
Q54HW4	0.601	0.603	1.003	0.00028474	9.3974e-05	0.614828	Q54HW4	99.5	Q54HW4	59.8	Q54HW4	60
Q54MZ8	0.658	0.603	0.916	0.00563108	0.00100137	0.288527	Q54MZ8	99.7	Q54MZ8	65.6	Q54MZ8	60.1
Q55E30	0.438	0.603	1.376	0.00036928	0.00063641	0.0549685	Q55E30	95	Q55E30	41.6	Q55E30	57.3
Q8T663	0.75	0.603	0.804	0.00762722	0.00050012	0.0710113	Q8T663	92.6	Q8T663	69.4	Q8T663	55.8
Q54VC5	0.508	0.6	1.183	0.00313778	0.00233905	0.899208	Q54VC5	95.8	Q54VC5	48.7	Q54VC5	57.5
Q55CI6	0.604	0.6	0.993	0.0308646	0.00774791	0.593767	Q55CI6	97.7	Q55CI6	59	Q55CI6	58.6
Q54T46	0.539	0.598	1.11	0.0215069	0.0102509	0.929152	Q54T46	103	Q54T46	55.5	Q54T46	61.6
Q7KWY4	0.683	0.598	0.875	0.00170952	0.00034086	0.214851	Q7KWY4	100	Q7KWY4	68.3	Q7KWY4	59.8
Q54LP9	0.637	0.594	0.934	0.00030323	7.1725e-05	0.0915508	Q54LP9	96.4	Q54LP9	61.4	Q54LP9	57.3
Q54WD4	0.655	0.594	0.907	0.00400321	0.00075244	0.285665	Q54WD4	100	Q54WD4	65.5	Q54WD4	59.4
Q550Q8	0.568	0.593	1.045	0.00674064	0.00236171	0.799244	Q550Q8	100	Q550Q8	56.8	Q550Q8	59.3
Q54B20	0.691	0.592	0.856	0.0010303	0.00013801	0.0571699	Q54B20	101.5	Q54B20	70.2	Q54B20	60.1
Q54R43	0.801	0.59	0.737	0.151778	0.0270206	0.478985	Q54R43	105.3	Q54R43	84.4	Q54R43	62.2
Q54JV8	0.744	0.589	0.791	0.162055	0.00468185	0.0974073	Q54JV8	101.7	Q54JV8	75.7	Q54JV8	59.9
Q54IL4	0.587	0.588	1.003	0.00273195	0.00074216	0.545422	Q54IL4	100	Q54IL4	58.7	Q54IL4	58.8
Q556V1	0.75	0.588	0.784	0.00256222	0.00015229	0.0254084	Q556V1	101.7	Q556V1	76.3	Q556V1	59.8
Q55E52	0.535	0.588	1.101	0.00644588	0.00364264	1	Q55E52	100	Q55E52	53.5	Q55E52	58.8
Q55ER6	0.665	0.586	0.881	0.00055221	0.00012201	0.121386	Q55ER6	100	Q55ER6	66.5	Q55ER6	58.6
C7G061	0.527	0.585	1.111	0.00036928	0.00026056	0.305999	C7G061	100	C7G061	52.7	C7G061	58.5
Q86A84	0.587	0.585	0.997	0.0154001	0.00375774	0.559212	Q86A84	99.6	Q86A84	58.5	Q86A84	58.3
Q54VS1	0.646	0.584	0.904	0.00101511	0.00017004	0.0953543	Q54VS1	105	Q54VS1	67.8	Q54VS1	61.3
Q556J1	0.688	0.584	0.849	0.00325297	0.00043065	0.125983	Q556J1	101.2	Q556J1	69.6	Q556J1	59.1
Q54MJ5	0.801	0.582	0.726	0.0416931	0.00157025	0.0829169	Q54MJ5	97.8	Q54MJ5	78.3	Q54MJ5	56.9
Q557I0	0.612	0.581	0.949	0.00013653	4.031e-05	0.134978	Q557I0	100	Q557I0	61.2	Q557I0	58.1
Q54X04	0.529	0.579	1.095	0.00511496	0.00235424	0.966567	Q54X04	100	Q54X04	52.9	Q54X04	57.9
Q54UK1	0.711	0.578	0.813	0.00337415	0.00024764	0.0478068	Q54UK1	100	Q54UK1	71.1	Q54UK1	57.8
Q54ZY3	0.59	0.575	0.975	0.00010981	3.9606e-05	0.542525	Q54ZY3	100	Q54ZY3	59	Q54ZY3	57.5
Q54W24	0.682	0.573	0.84	0.00047849	5.8878e-05	0.0185036	Q54W24	100	Q54W24	68.2	Q54W24	57.3
Q55CV9	0.605	0.573	0.948	0.00045593	0.00011055	0.153216	Q55CV9	100	Q55CV9	60.5	Q55CV9	57.3
Q869L9	0.576	0.571	0.99	0.029317	0.00955262	0.74121	Q869L9	102.7	Q869L9	59.2	Q869L9	58.6
Q54M56	0.633	0.57	0.901	0.00146773	0.00038282	0.438861	Q54M56	103.6	Q54M56	65.5	Q54M56	59
Q37311	0.603	0.569	0.943	0.0129905	0.00549605	0.89353	Q37311	100	Q37311	60.3	Q37311	56.9
Q54VS7	0.657	0.569	0.867	0.00184576	0.00029873	0.134583	Q54VS7	100	Q54VS7	65.7	Q54VS7	56.9
Q54NS1	0.946	0.567	0.6	0.773938	0.00112044	0.0174132	Q54NS1	98.8	Q54NS1	93.4	Q54NS1	56
Q54G84	0.725	0.566	0.78	0.00089191	6.7605e-05	0.0128044	Q54G84	100	Q54G84	72.5	Q54G84	56.6
Q54GL4	0.561	0.565	1.008	0.0333437	0.0114048	0.767824	Q54GL4	100	Q54GL4	56.1	Q54GL4	56.5
Q55CJ9	0.557	0.564	1.012	0.00474724	0.00141971	0.679639	Q55CJ9	103	Q55CJ9	57.4	Q55CJ9	58.1
Q54DF7	0.954	0.563	0.591	0.935014	0.00384491	0.0321911	Q54DF7	99.5	Q54DF7	94.9	Q54DF7	56
B0G119	0.466	0.562	1.205	0.0142639	0.0145701	0.94471	B0G119	103.7	B0G119	48.4	B0G119	58.3
Q54I91	1.03	0.562	0.546	0.999472	0.00942769	0.0417056	Q54I91	100	Q54I91	103	Q54I91	56.2
Q54PT6	0.631	0.56	0.887	0.00311971	0.00055988	0.233097	Q54PT6	97.4	Q54PT6	61.5	Q54PT6	54.5
Q55GU4	0.924	0.559	0.605	0.899255	0.0724421	0.177339	Q55GU4	95.6	Q55GU4	88.4	Q55GU4	53.5
O21038	0.623	0.558	0.895	0.00320957	0.00065991	0.322278	O21038	100	O21038	62.3	O21038	55.8
Q54N67	0.611	0.557	0.913	0.00024597	5.9416e-05	0.0931019	Q54N67	103.5	Q54N67	63.2	Q54N67	57.7
Q54NC1	0.777	0.557	0.717	0.0822085	0.00425288	0.131897	Q54NC1	100.1	Q54NC1	77.8	Q54NC1	55.8
Q54JT8	0.688	0.555	0.807	0.0633945	0.0153048	0.594708	Q54JT8	100.5	Q54JT8	69.2	Q54JT8	55.8
Q54G97	0.63	0.552	0.877	0.024446	0.00711741	0.674153	Q54G97	100	Q54G97	63	Q54G97	55.2
Q54D04	0.413	0.55	1.332	0.0773924	0.0682089	1	Q54D04	100	Q54D04	41.3	Q54D04	55
Q55EC5	0.719	0.548	0.763	0.00110243	9.2688e-05	0.0219636	Q55EC5	100	Q55EC5	71.9	Q55EC5	54.9
Q54UT2	0.567	0.547	0.965	0.00013653	4.3353e-05	0.547166	Q54UT2	100	Q54UT2	56.7	Q54UT2	54.7
Q54DY1	0.497	0.545	1.095	0.0236978	0.0148442	0.993129	Q54DY1	99.7	Q54DY1	49.6	Q54DY1	54.3
Q54G19	0.38	0.545	1.437	0.00382828	0.00724778	0.391939	Q54G19	114.8	Q54G19	43.6	Q54G19	62.6
Q54LW3	0.589	0.544	0.925	0.00131969	0.00032115	0.339553	Q54LW3	100	Q54LW3	58.9	Q54LW3	54.4
Q54BM8	0.616	0.541	0.88	0.0048533	0.00094242	0.325923	Q54BM8	100	Q54BM8	61.6	Q54BM8	54.1
Q37313	0.578	0.54	0.935	0.00099539	0.00033691	0.748439	Q37313	100	Q37313	57.8	Q37313	54
Q55EZ9	0.68	0.54	0.795	0.0208186	0.00098477	0.0783228	Q55EZ9	98.8	Q55EZ9	67.2	Q55EZ9	53.4
Q54MY2	0.657	0.536	0.816	0.00784758	0.00067795	0.102771	Q54MY2	100	Q54MY2	65.7	Q54MY2	53.6
Q54NS9	0.928	0.536	0.577	0.685768	0.00039522	0.00863498	Q54NS9	100.1	Q54NS9	92.9	Q54NS9	53.7
Q54HG5	0.701	0.535	0.763	0.0302458	0.00190435	0.120505	Q54HG5	99.9	Q54HG5	70	Q54HG5	53.4
Q9GPS1	0.529	0.532	1.005	0.0205562	0.00545002	0.615998	Q9GPS1	100	Q9GPS1	52.9	Q9GPS1	53.2
Q54JW0	0.617	0.53	0.86	0.00553602	0.00086393	0.224287	Q54JW0	100	Q54JW0	61.7	Q54JW0	53
Q54ND0	0.768	0.53	0.69	0.126101	0.0019453	0.0580837	Q54ND0	99.9	Q54ND0	76.7	Q54ND0	52.9
Q54DN9	0.526	0.526	1.001	0.00018102	5.8878e-05	0.817326	Q54DN9	101.5	Q54DN9	53.4	Q54DN9	53.4
Q556I2	0.661	0.526	0.797	0.0003365	4.9657e-05	0.0216902	Q556I2	100	Q556I2	66.1	Q556I2	52.6
Q55F22	0.625	0.526	0.841	0.00661521	0.00079235	0.153118	Q55F22	88.3	Q55F22	55.2	Q55F22	46.4
Q54ES4	0.53	0.525	0.991	0.0200701	0.00568478	0.657542	Q54ES4	100.8	Q54ES4	53.4	Q54ES4	52.9
Q54SG2	0.515	0.525	1.018	0.00012348	4.4841e-05	0.678436	Q54SG2	102	Q54SG2	52.6	Q54SG2	53.5
Q54UH1	0.572	0.525	0.917	0.00804596	0.0013759	0.305189	Q54UH1	100	Q54UH1	57.2	Q54UH1	52.5
Q54IA0	0.494	0.523	1.059	0.00079269	0.0003485	1	Q54IA0	100	Q54IA0	49.4	Q54IA0	52.3
Q54PT4	0.629	0.523	0.832	0.00049471	8.7502e-05	0.0594958	Q54PT4	101.1	Q54PT4	63.6	Q54PT4	52.9
Q54I27	0.797	0.522	0.655	0.0192182	0.0002015	0.0124178	Q54I27	99.3	Q54I27	79.2	Q54I27	51.8
Q54VE8	0.635	0.522	0.822	0.00019842	3.9606e-05	0.00983591	Q54VE8	100.9	Q54VE8	64	Q54VE8	52.6
Q54UQ6	0.529	0.521	0.985	0.00045541	0.00016194	0.734764	Q54UQ6	100	Q54UQ6	52.9	Q54UQ6	52.1
Q55DT8	0.452	0.521	1.154	0.00489975	0.00294604	1	Q55DT8	100	Q55DT8	45.2	Q55DT8	52.1
Q54QP9	0.653	0.52	0.796	0.0569543	0.0151758	0.643756	Q54QP9	101.3	Q54QP9	66.2	Q54QP9	52.6
Q54SI4	0.57	0.52	0.912	0.00942921	0.00165431	0.335064	Q54SI4	101.5	Q54SI4	57.9	Q54SI4	52.8
Q8I7W9	0.562	0.518	0.921	0.00044099	0.00012322	0.261411	Q8I7W9	100	Q8I7W9	56.2	Q8I7W9	51.8
Q54Y72	0.756	0.517	0.683	0.0878915	0.00179018	0.0640735	Q54Y72	100	Q54Y72	75.6	Q54Y72	51.7
Q86JL2	0.63	0.514	0.816	0.00213021	0.00040109	0.210604	Q86JL2	100	Q86JL2	63	Q86JL2	51.4
Q54MJ1	0.726	0.513	0.706	0.318925	0.0502438	0.430215	Q54MJ1	88.7	Q54MJ1	64.4	Q54MJ1	45.5
Q54T75	0.58	0.513	0.884	0.0001363	3.9606e-05	0.0240781	Q54T75	99.7	Q54T75	57.8	Q54T75	51.1
Q555E3	0.538	0.513	0.954	0.00153552	0.00035135	0.310166	Q555E3	100	Q555E3	53.8	Q555E3	51.3
Q54NZ8	0.514	0.512	0.997	0.002262	0.0008899	0.918118	Q54NZ8	101.9	Q54NZ8	52.3	Q54NZ8	52.1
Q54NM6	0.552	0.51	0.925	0.00013653	4.031e-05	0.134478	Q54NM6	100	Q54NM6	55.2	Q54NM6	51
Q86L22	0.742	0.508	0.685	0.368695	0.0260701	0.211437	Q86L22	100.2	Q86L22	74.3	Q86L22	50.9
Q54D12	0.568	0.507	0.892	0.0380745	0.00609369	0.376887	Q54D12	98.2	Q54D12	55.8	Q54D12	49.8
Q55A40	0.709	0.507	0.714	0.0300847	0.00155544	0.099385	Q55A40	100	Q55A40	70.9	Q55A40	50.7
Q54M86	0.617	0.506	0.821	0.001797	0.00031229	0.15768	Q54M86	100	Q54M86	61.7	Q54M86	50.6
Q54W88	0.397	0.504	1.268	0.0501952	0.034079	0.994266	Q54W88	102	Q54W88	40.5	Q54W88	51.4
Q55FI1	0.45	0.504	1.119	0.017895	0.0127157	1	Q55FI1	102.6	Q55FI1	46.2	Q55FI1	51.7
Q75K17	0.728	0.504	0.691	0.131541	0.00463722	0.107487	Q75K17	100.2	Q75K17	73	Q75K17	50.5
Q54GF1	0.58	0.502	0.866	0.00091691	0.00021744	0.241547	Q54GF1	102.8	Q54GF1	59.6	Q54GF1	51.6
Q553V2	0.394	0.502	1.275	0.0294241	0.0276201	0.992698	Q553V2	99.6	Q553V2	39.2	Q553V2	50
Q54WE8	0.594	0.5	0.841	0.0131918	0.00134886	0.161213	Q54WE8	94.6	Q54WE8	56.2	Q54WE8	47.3
Q54CT8	0.39	0.497	1.276	0.00236768	0.00197816	0.755386	Q54CT8	101.1	Q54CT8	39.4	Q54CT8	50.3
Q54QE2	0.698	0.497	0.711	0.0515401	0.00197265	0.0904673	Q54QE2	94.3	Q54QE2	65.9	Q54QE2	46.8
Q54F06	0.653	0.495	0.758	0.0143596	0.00096553	0.098657	Q54F06	101.8	Q54F06	66.5	Q54F06	50.4
Q54HN7	0.56	0.495	0.884	0.00033913	7.6146e-05	0.0881457	Q54HN7	101.5	Q54HN7	56.8	Q54HN7	50.3
Q55C52	0.563	0.495	0.878	0.00026625	5.3866e-05	0.0529352	Q55C52	94.2	Q55C52	53.1	Q55C52	46.6
Q554C4	0.553	0.494	0.893	0.00033884	8.2232e-05	0.122182	Q554C4	100	Q554C4	55.3	Q554C4	49.4
Q55DQ6	0.455	0.494	1.086	0.00027331	0.00012831	0.878187	Q55DQ6	100	Q55DQ6	45.5	Q55DQ6	49.4
Q54IY2	0.478	0.493	1.03	0.0844809	0.0342037	0.844214	Q54IY2	95.7	Q54IY2	45.8	Q54IY2	47.1
Q54K35	0.573	0.493	0.859	0.00061959	0.00011582	0.085666	Q54K35	90.7	Q54K35	52	Q54K35	44.7
Q54XS2	0.376	0.493	1.31	0.0157892	0.0135543	0.989807	Q54XS2	100	Q54XS2	37.6	Q54XS2	49.3
O21045	0.433	0.492	1.137	0.00108953	0.00075915	0.690099	O21045	105.3	O21045	45.6	O21045	51.8
Q54BH0	0.622	0.492	0.791	0.00254082	0.00016846	0.0309588	Q54BH0	100	Q54BH0	62.2	Q54BH0	49.2
Q54WJ1	0.495	0.492	0.993	0.0242303	0.00516915	0.494851	Q54WJ1	97.8	Q54WJ1	48.4	Q54WJ1	48.1
Q7KWX2	0.689	0.492	0.714	0.0344399	0.00133914	0.0794321	Q7KWX2	99.4	Q7KWX2	68.5	Q7KWX2	48.9
Q54I78	0.47	0.491	1.045	0.00642542	0.00191801	0.681489	Q54I78	98.9	Q54I78	46.5	Q54I78	48.5
Q553I0	0.36	0.49	1.363	0.00025424	0.00030433	0.0535631	Q553I0	101.6	Q553I0	36.5	Q553I0	49.8
Q54S35	0.549	0.487	0.887	0.138604	0.0504088	0.797814	Q54S35	102	Q54S35	56	Q54S35	49.7
Q54XF6	0.589	0.487	0.826	0.0002344	4.5418e-05	0.0250955	Q54XF6	100	Q54XF6	58.9	Q54XF6	48.7
Q54P88	0.587	0.484	0.823	0.0045745	0.0008787	0.316507	Q54P88	100	Q54P88	58.7	Q54P88	48.4
Q75JL2	0.456	0.483	1.059	0.0422792	0.0130953	0.715134	Q75JL2	100	Q75JL2	45.6	Q75JL2	48.3
Q556S6	0.516	0.481	0.932	0.00032443	0.00010615	0.542436	Q556S6	106.2	Q556S6	54.8	Q556S6	51.1
Q54YF3	1.064	0.48	0.451	0.995622	0.0650138	0.105382	Q54YF3	100	Q54YF3	106.4	Q54YF3	48
Q54YR4	0.931	0.479	0.514	0.949843	0.101985	0.201868	Q54YR4	100	Q54YR4	93.1	Q54YR4	47.9
Q54XX9	0.512	0.477	0.931	0.0399071	0.0392533	0.992487	Q54XX9	100.8	Q54XX9	51.7	Q54XX9	48.1
Q54IM8	0.387	0.476	1.232	0.0361663	0.0215432	0.979303	Q54IM8	100	Q54IM8	38.7	Q54IM8	47.6
Q55GM6	0.496	0.476	0.959	0.0441969	0.0081577	0.449019	Q55GM6	100	Q55GM6	49.6	Q55GM6	47.6
Q54M18	0.435	0.475	1.091	0.0157175	0.00590816	0.826843	Q54M18	100	Q54M18	43.5	Q54M18	47.5
Q54Y25	0.374	0.474	1.267	0.0134175	0.00988004	1	Q54Y25	100	Q54Y25	37.4	Q54Y25	47.4
Q54ID0	0.538	0.472	0.879	0.00415292	0.00065327	0.201505	Q54ID0	100	Q54ID0	53.8	Q54ID0	47.2
Q54E57	0.6	0.471	0.785	0.00156309	0.00019899	0.07309	Q54E57	100	Q54E57	60	Q54E57	47.1
Q54J36	0.64	0.471	0.736	0.222803	0.0331539	0.413791	Q54J36	101	Q54J36	64.6	Q54J36	47.6
Q54V88	0.647	0.47	0.726	0.0252214	0.00140011	0.10001	Q54V88	101.1	Q54V88	65.4	Q54V88	47.5
Q54BY9	0.613	0.468	0.764	0.00067621	7.1725e-05	0.0200072	Q54BY9	93.8	Q54BY9	57.5	Q54BY9	43.9
Q54QI7	0.529	0.468	0.885	0.00010981	3.7159e-05	0.0191655	Q54QI7	103.2	Q54QI7	54.6	Q54QI7	48.3
Q54N68	0.401	0.467	1.166	0.0159435	0.00703647	0.906226	Q54N68	103.9	Q54N68	41.7	Q54N68	48.6
Q54HV4	0.527	0.466	0.885	0.0359113	0.00789965	0.528722	Q54HV4	100	Q54HV4	52.7	Q54HV4	46.6
Q8MP58	0.388	0.466	1.202	0.0121116	0.00625776	0.974285	Q8MP58	100	Q8MP58	38.8	Q8MP58	46.6
Q55E63	0.416	0.465	1.119	0.00019776	8.263e-05	0.632766	Q55E63	101.2	Q55E63	42.1	Q55E63	47.1
Q54CX2	0.539	0.457	0.848	0.00014973	3.9606e-05	0.0216069	Q54CX2	101.5	Q54CX2	54.7	Q54CX2	46.4
Q9NKW1	1.105	0.457	0.414	0.991166	0.0281699	0.0689947	Q9NKW1	100	Q9NKW1	110.5	Q9NKW1	45.7
Q54ND5	0.695	0.455	0.655	0.010595	0.00061405	0.0730079	Q54ND5	100	Q54ND5	69.5	Q54ND5	45.5
Q54UW1	0.493	0.454	0.92	0.00135208	0.00063146	1	Q54UW1	88.5	Q54UW1	43.6	Q54UW1	40.1
Q55BN2	0.677	0.452	0.668	0.0162855	0.00050143	0.0428459	Q55BN2	101.8	Q55BN2	68.9	Q55BN2	46
Q869B9	0.428	0.451	1.055	0.00443453	0.00134776	0.689218	Q869B9	100	Q869B9	42.8	Q869B9	45.1
Q54KR0	0.686	0.45	0.657	0.0122162	0.00061343	0.0658656	Q54KR0	103.4	Q54KR0	70.9	Q54KR0	46.6
Q55C94	0.549	0.45	0.82	0.00010981	3.9606e-05	0.0202112	Q55C94	99.2	Q55C94	54.4	Q55C94	44.6
Q55GW1	0.476	0.446	0.937	0.00058989	0.0001652	0.338404	Q55GW1	97.5	Q55GW1	46.4	Q55GW1	43.5
Q55FL0	0.76	0.443	0.583	0.90347	0.0293872	0.101193	Q55FL0	100	Q55FL0	76	Q55FL0	44.3
Q7KWW3	0.556	0.438	0.787	0.0417383	0.00538452	0.296003	Q7KWW3	102.6	Q7KWW3	57.1	Q7KWW3	44.9
Q55GW0	0.633	0.434	0.686	0.0158956	0.00052541	0.0462295	Q55GW0	99.8	Q55GW0	63.2	Q55GW0	43.4
Q54GK8	0.375	0.433	1.155	0.00422602	0.00194782	0.978654	Q54GK8	99.3	Q54GK8	37.2	Q54GK8	43
Q54RR6	0.505	0.427	0.846	0.00029997	6.9323e-05	0.0905009	Q54RR6	99.5	Q54RR6	50.3	Q54RR6	42.5
Q54BJ5	0.523	0.426	0.813	0.00013653	3.9606e-05	0.019199	Q54BJ5	102.5	Q54BJ5	53.6	Q54BJ5	43.6
Q54K52	0.706	0.426	0.603	0.31581	0.0717609	0.572722	Q54K52	100	Q54K52	70.6	Q54K52	42.6
Q54L05	0.624	0.425	0.681	0.00068998	5.2493e-05	0.00946742	Q54L05	100	Q54L05	62.4	Q54L05	42.5
Q54Q52	0.387	0.425	1.098	0.00032266	0.00019415	0.463367	Q54Q52	106	Q54Q52	41	Q54Q52	45
Q54Z02	0.509	0.425	0.835	0.00031594	8.139e-05	0.143512	Q54Z02	97.5	Q54Z02	49.7	Q54Z02	41.5
Q54R47	0.36	0.424	1.176	0.00682378	0.00377694	0.997831	Q54R47	100	Q54R47	36	Q54R47	42.4
Q9UA41	0.27	0.424	1.57	0.020701	0.0207144	0.973412	Q9UA41	100	Q9UA41	27	Q9UA41	42.4
Q55E67	0.505	0.423	0.837	0.00125973	0.00035803	0.536223	Q55E67	96.9	Q55E67	49	Q55E67	41
Q54RW4	0.479	0.421	0.879	0.00016895	4.0854e-05	0.0553842	Q54RW4	100	Q54RW4	47.9	Q54RW4	42.1
Q54V95	0.428	0.421	0.985	5.1251e-05	2.3565e-05	0.987763	Q54V95	99.1	Q54V95	42.4	Q54V95	41.7
Q54XZ1	0.502	0.419	0.833	0.00052166	0.00010488	0.0945233	Q54XZ1	93.8	Q54XZ1	47.1	Q54XZ1	39.3
Q54YE8	0.566	0.419	0.74	0.00799427	0.00054969	0.0767392	Q54YE8	102.3	Q54YE8	57.9	Q54YE8	42.9
Q54YZ4	0.389	0.418	1.074	0.00598131	0.0021252	0.814441	Q54YZ4	100	Q54YZ4	38.9	Q54YZ4	41.8
Q556H6	0.436	0.418	0.96	0.00040919	0.00013657	0.568478	Q556H6	99.7	Q556H6	43.4	Q556H6	41.7
Q54MI5	0.959	0.416	0.434	0.967301	0.0105101	0.0536374	Q54MI5	95.9	Q54MI5	92	Q54MI5	39.9
Q55G90	0.497	0.416	0.837	0.0771364	0.00855397	0.280434	Q55G90	101.4	Q55G90	50.4	Q55G90	42.2
Q1ZXC3	0.324	0.411	1.269	0.020159	0.0136574	1	Q1ZXC3	101.3	Q1ZXC3	32.8	Q1ZXC3	41.6
Q54DW1	0.443	0.411	0.927	0.00073432	0.00021475	0.449399	Q54DW1	100	Q54DW1	44.3	Q54DW1	41.1
Q55FZ5	0.568	0.41	0.722	0.296098	0.0323732	0.312669	Q55FZ5	93.4	Q55FZ5	53.1	Q55FZ5	38.3
Q86HW2	0.599	0.41	0.685	0.0497425	0.0061554	0.291697	Q86HW2	100.6	Q86HW2	60.2	Q86HW2	41.3
Q966U0	0.445	0.41	0.923	0.0002344	6.628e-05	0.20851	Q966U0	94.5	Q966U0	42	Q966U0	38.8
Q54XS7	0.866	0.408	0.471	0.509042	0.00766481	0.0744792	Q54XS7	100.4	Q54XS7	87	Q54XS7	41
Q86KA4	0.395	0.407	1.03	0.00238899	0.00063307	0.512179	Q86KA4	98.9	Q86KA4	39.1	Q86KA4	40.3
Q54VB0	0.736	0.404	0.548	0.0584161	0.00135653	0.0614876	Q54VB0	101.9	Q54VB0	75.1	Q54VB0	41.2
Q555E4	0.61	0.402	0.659	0.0911081	0.0131702	0.380638	Q555E4	94.7	Q555E4	57.8	Q555E4	38.1
P13231	1.152	0.401	0.348	0.969037	0.0208204	0.0756699	P13231	93.8	P13231	108.1	P13231	37.6
Q54Y48	0.492	0.4	0.812	0.00105367	0.00017282	0.0931019	Q54Y48	103	Q54Y48	50.7	Q54Y48	41.2
Q54CC6	0.92	0.398	0.433	0.879824	0.0255719	0.0971121	Q54CC6	98.1	Q54CC6	90.2	Q54CC6	39
Q55CH9	1.259	0.398	0.316	0.884799	0.094008	0.0998346	Q55CH9	99.2	Q55CH9	124.9	Q55CH9	39.5
Q54JX1	0.319	0.397	1.245	0.00812175	0.00503397	1	Q54JX1	100.2	Q54JX1	31.9	Q54JX1	39.8
Q54JE9	0.524	0.394	0.751	0.0218017	0.00409435	0.422999	Q54JE9	100	Q54JE9	52.4	Q54JE9	39.4
Q54PL1	0.372	0.392	1.056	0.011021	0.00541228	0.963708	Q54PL1	100	Q54PL1	37.2	Q54PL1	39.2
Q551M9	0.461	0.39	0.845	0.00128904	0.00020153	0.0987106	Q551M9	100	Q551M9	46.1	Q551M9	39
Q54HW0	0.398	0.389	0.978	0.00085157	0.000256	0.542027	Q54HW0	100.9	Q54HW0	40.1	Q54HW0	39.3
Q556S5	0.749	0.389	0.519	0.0277857	0.00012322	0.00736768	Q556S5	101.5	Q556S5	76	Q556S5	39.5
Q55AF6	0.49	0.388	0.791	0.00289975	0.00065489	0.384282	Q55AF6	88.6	Q55AF6	43.5	Q55AF6	34.4
Q55BF9	0.429	0.387	0.903	0.00018262	4.81e-05	0.166357	Q55BF9	102.2	Q55BF9	43.9	Q55BF9	39.6
Q55D85	0.842	0.387	0.459	0.495809	0.00417606	0.0524981	Q55D85	98.7	Q55D85	83.2	Q55D85	38.2
Q54NX3	0.339	0.386	1.138	0.0421758	0.0239613	0.96749	Q54NX3	97.8	Q54NX3	33.2	Q54NX3	37.8
Q54S63	0.625	0.386	0.619	0.08864	0.00658914	0.188641	Q54S63	100	Q54S63	62.5	Q54S63	38.6
Q55E82	0.391	0.385	0.984	0.00125087	0.00044124	0.837773	Q55E82	93.6	Q55E82	36.6	Q55E82	36
Q75JI5	0.87	0.384	0.441	0.923916	0.00983718	0.0550562	Q75JI5	96.4	Q75JI5	83.9	Q75JI5	37
Q54N98	0.606	0.383	0.632	0.0348081	0.00080481	0.048282	Q54N98	94.6	Q54N98	57.3	Q54N98	36.2
P32253	0.778	0.382	0.491	0.367082	0.00267099	0.0451603	P32253	99.9	P32253	77.8	P32253	38.2
Q54W30	0.247	0.382	1.546	0.0236624	0.0339974	0.864582	Q54W30	97.7	Q54W30	24.1	Q54W30	37.3
Q55AP1	1.247	0.381	0.306	0.832096	0.0182077	0.0439294	Q55AP1	110.4	Q55AP1	137.6	Q55AP1	42.1
Q55BT7	0.213	0.375	1.766	0.0114545	0.0406983	0.370582	Q55BT7	93	Q55BT7	19.8	Q55BT7	34.9
Q54EX7	0.629	0.373	0.593	0.0320224	0.00133285	0.0825281	Q54EX7	100	Q54EX7	62.9	Q54EX7	37.3
Q54KX3	0.453	0.373	0.823	0.00436412	0.00102213	0.457528	Q54KX3	100	Q54KX3	45.3	Q54KX3	37.3
Q54RZ5	0.546	0.371	0.678	0.0041941	0.00045304	0.10308	Q54RZ5	101.1	Q54RZ5	55.3	Q54RZ5	37.5
Q54KH2	0.821	0.37	0.451	0.595293	0.00472433	0.0512482	Q54KH2	100	Q54KH2	82.1	Q54KH2	37
Q86K31	0.411	0.369	0.897	0.00019895	5.5433e-05	0.228305	Q86K31	107.1	Q86K31	44	Q86K31	39.5
Q55GG9	0.433	0.368	0.851	0.00083956	0.0002192	0.328591	Q55GG9	98.9	Q55GG9	42.8	Q55GG9	36.4
Q54JE3	1.276	0.366	0.287	0.909375	0.103042	0.107668	Q54JE3	100	Q54JE3	127.6	Q54JE3	36.6
Q54M25	2.058	0.363	0.176	0.0572688	0.00575706	0.0100395	Q54M25	88.9	Q54M25	183	Q54M25	32.3
Q54JV0	0.451	0.36	0.8	0.00827434	0.0025247	0.699388	Q54JV0	100	Q54JV0	45.1	Q54JV0	36
Q55AW9	0.748	0.36	0.481	0.311327	0.0136532	0.144304	Q55AW9	100	Q55AW9	74.8	Q55AW9	36
Q54W18	0.538	0.358	0.666	0.00673263	0.00036665	0.0508881	Q54W18	100	Q54W18	53.8	Q54W18	35.8
Q27564	0.362	0.355	0.981	0.00061959	0.00016652	0.293975	Q27564	102.6	Q27564	37.1	Q27564	36.4
Q54JV3	0.73	0.355	0.487	0.185999	0.00211494	0.0522717	Q54JV3	99.8	Q54JV3	72.8	Q54JV3	35.5
Q557J5	0.38	0.353	0.929	3.7733e-05	1.2098e-05	0.19624	Q557J5	100	Q557J5	38	Q557J5	35.3
Q550H2	0.34	0.351	1.031	0.00185382	0.00065653	0.830382	Q550H2	100	Q550H2	34	Q550H2	35.1
Q54EX8	0.695	0.349	0.501	0.00240378	4.031e-05	0.00411127	Q54EX8	110.8	Q54EX8	77	Q54EX8	38.6
Q54IA1	0.466	0.349	0.75	0.00833488	0.00099658	0.16868	Q54IA1	103	Q54IA1	48	Q54IA1	36
Q54LN5	0.652	0.349	0.536	0.080344	0.0017455	0.0656619	Q54LN5	91.3	Q54LN5	59.5	Q54LN5	31.9
Q54VE2	0.644	0.349	0.542	0.0762286	0.00212007	0.0779022	Q54VE2	98.8	Q54VE2	63.6	Q54VE2	34.4
Q54GC2	0.47	0.348	0.742	0.00108209	0.0001935	0.115351	Q54GC2	106.9	Q54GC2	50.2	Q54GC2	37.2
Q54L39	0.373	0.348	0.932	0.00200354	0.00069149	0.801848	Q54L39	90.3	Q54L39	33.7	Q54L39	31.4
Q7KWV8	0.373	0.348	0.934	0.00028522	9.1809e-05	0.520292	Q7KWV8	103.9	Q7KWV8	38.7	Q7KWV8	36.1
Q54FG4	0.611	0.347	0.569	0.0385795	0.00122055	0.0689947	Q54FG4	100	Q54FG4	61.1	Q54FG4	34.7
Q54XE8	0.413	0.347	0.841	0.00859706	0.00156806	0.346564	Q54XE8	101.3	Q54XE8	41.8	Q54XE8	35.2
Q55D58	0.414	0.347	0.838	0.010926	0.0026366	0.543215	Q55D58	96.1	Q55D58	39.8	Q55D58	33.3
P42526	1.1	0.345	0.314	0.995497	0.00589663	0.0318812	P42526	88.7	P42526	97.6	P42526	30.6
Q54FK8	0.658	0.345	0.525	0.0316727	0.00052574	0.0318875	Q54FK8	100	Q54FK8	65.8	Q54FK8	34.5
Q54NM3	0.379	0.345	0.909	0.00019508	4.81e-05	0.118243	Q54NM3	99.8	Q54NM3	37.8	Q54NM3	34.4
Q75JC5	1.111	0.345	0.31	0.988075	0.0465685	0.108051	Q75JC5	95.8	Q75JC5	106.4	Q75JC5	33
Q54SL9	0.389	0.344	0.884	0.00010981	3.9606e-05	0.0646564	Q54SL9	107.8	Q54SL9	41.9	Q54SL9	37
Q54XL8	0.613	0.344	0.561	0.0575709	0.00191747	0.0833352	Q54XL8	95.4	Q54XL8	58.5	Q54XL8	32.8
Q550C1	0.738	0.344	0.465	0.318014	0.0146558	0.14964	Q550C1	100	Q550C1	73.8	Q550C1	34.4
Q54RX7	0.621	0.343	0.553	0.0115288	0.0002159	0.0172846	Q54RX7	100	Q54RX7	62.1	Q54RX7	34.3
Q1ZXQ4	0.945	0.342	0.362	0.780434	0.00812253	0.0587265	Q1ZXQ4	100	Q1ZXQ4	94.5	Q1ZXQ4	34.2
Q54BT7	0.444	0.342	0.771	0.00045379	9.2688e-05	0.0843039	Q54BT7	102.2	Q54BT7	45.4	Q54BT7	34.9
Q86L18	0.909	0.34	0.374	0.555556	0.00033444	0.00835868	Q86L18	100	Q86L18	90.9	Q86L18	34
Q54T09	0.889	0.337	0.379	0.777661	0.0168476	0.0877706	Q54T09	98.6	Q54T09	87.7	Q54T09	33.2
Q54XX2	1.015	0.337	0.332	0.964051	0.0512223	0.123207	Q54XX2	95.9	Q54XX2	97.3	Q54XX2	32.3
Q55EY5	0.54	0.337	0.624	0.0204376	0.00179299	0.15434	Q55EY5	100	Q55EY5	54	Q55EY5	33.7
Q54EA1	0.48	0.336	0.7	0.00491311	0.00068293	0.17086	Q54EA1	100	Q54EA1	48	Q54EA1	33.6
Q554R7	0.459	0.336	0.731	0.00237676	0.00029193	0.0916738	Q554R7	100	Q554R7	45.9	Q554R7	33.6
Q54TH7	0.486	0.335	0.688	0.0120424	0.00117539	0.146743	Q54TH7	100	Q54TH7	48.6	Q54TH7	33.5
Q54U30	0.815	0.335	0.411	0.282855	0.0008787	0.022575	Q54U30	84.5	Q54U30	68.8	Q54U30	28.3
Q55AA7	0.337	0.335	0.994	0.00134737	0.00044121	0.729524	Q55AA7	98	Q55AA7	33	Q55AA7	32.9
Q55BL6	0.359	0.335	0.934	0.00054535	0.0001796	0.617073	Q55BL6	95.3	Q55BL6	34.2	Q55BL6	32
Q54KL1	0.352	0.334	0.949	0.00010981	3.9606e-05	0.219834	Q54KL1	101.7	Q54KL1	35.8	Q54KL1	34
Q54P72	0.483	0.332	0.686	0.00199671	0.00016028	0.0349413	Q54P72	98.2	Q54P72	47.4	Q54P72	32.6
Q54VL3	0.402	0.33	0.821	0.0424088	0.0127451	0.699283	Q54VL3	100	Q54VL3	40.2	Q54VL3	33
Q86JP3	0.781	0.327	0.419	0.186925	0.00041379	0.013096	Q86JP3	100.7	Q86JP3	78.6	Q86JP3	32.9
B0G180	1.179	0.326	0.276	0.999986	0.0598802	0.106348	B0G180	107.9	B0G180	127.2	B0G180	35.1
Q7KWQ5	0.788	0.326	0.413	0.547387	0.0247561	0.146172	Q7KWQ5	100	Q7KWQ5	78.8	Q7KWQ5	32.6
Q551G6	0.702	0.325	0.462	0.227653	0.00507532	0.0870279	Q551G6	100	Q551G6	70.2	Q551G6	32.5
Q55AX2	0.496	0.323	0.651	0.00090187	0.0001008	0.0338142	Q55AX2	100	Q55AX2	49.6	Q55AX2	32.3
Q54I12	0.784	0.322	0.41	0.565178	0.00801562	0.0723373	Q54I12	98.6	Q54I12	77.3	Q54I12	31.7
Q86JM5	1.22	0.322	0.264	0.988075	0.117663	0.14116	Q86JM5	97.3	Q86JM5	118.7	Q86JM5	31.4
Q54LF0	0.502	0.321	0.638	0.00339687	0.00026889	0.0547948	Q54LF0	104.7	Q54LF0	52.6	Q54LF0	33.6
Q54SC0	0.396	0.321	0.811	0.00010981	3.9606e-05	0.0264898	Q54SC0	100	Q54SC0	39.6	Q54SC0	32.1
P21837	0.956	0.32	0.335	0.978967	0.00063055	0.0100214	P21837	100	P21837	95.6	P21837	32
Q54TB0	0.309	0.32	1.038	0.00116967	0.00039544	0.777705	Q54TB0	100	Q54TB0	30.9	Q54TB0	32
Q55BU8	1.008	0.319	0.316	0.888317	0.0436293	0.129614	Q55BU8	105	Q55BU8	105.9	Q55BU8	33.5
Q54IP9	1.167	0.318	0.272	0.999986	0.0517127	0.100195	Q54IP9	95.6	Q54IP9	111.6	Q54IP9	30.4
Q553T0	0.77	0.317	0.411	0.619694	0.0133172	0.0907647	Q553T0	100	Q553T0	77	Q553T0	31.7
Q54GE6	0.774	0.315	0.407	0.503795	0.00797432	0.076187	Q54GE6	97	Q54GE6	75.1	Q54GE6	30.6
Q54LM1	0.561	0.315	0.562	0.0150399	0.00051288	0.046477	Q54LM1	100	Q54LM1	56.1	Q54LM1	31.5
Q54NZ6	0.681	0.315	0.462	0.208244	0.00280487	0.0604695	Q54NZ6	100	Q54NZ6	68.1	Q54NZ6	31.5
P34112	0.546	0.314	0.575	0.0261313	0.00164663	0.114309	P34112	102.6	P34112	56	P34112	32.2
Q55C85	0.402	0.314	0.78	0.0001524	3.9606e-05	0.0209758	Q55C85	99.3	Q55C85	39.9	Q55C85	31.1
Q54VM9	0.398	0.313	0.785	0.00108536	0.00029291	0.430995	Q54VM9	100	Q54VM9	39.8	Q54VM9	31.3
Q552J9	0.546	0.313	0.574	0.0271117	0.00164268	0.111185	Q552J9	100.5	Q552J9	54.8	Q552J9	31.5
Q54HJ4	1.289	0.312	0.242	0.55932	0.00323037	0.0157862	Q54HJ4	100.4	Q54HJ4	129.5	Q54HJ4	31.4
Q54IZ7	0.405	0.312	0.769	0.00125973	0.00023121	0.140007	Q54IZ7	100	Q54IZ7	40.5	Q54IZ7	31.2
Q54LL8	0.511	0.312	0.611	0.0130883	0.0008498	0.0911994	Q54LL8	100	Q54LL8	51.1	Q54LL8	31.2
Q54TZ7	0.418	0.311	0.744	0.00043996	9.0661e-05	0.0850561	Q54TZ7	102	Q54TZ7	42.6	Q54TZ7	31.7
Q86H81	0.35	0.311	0.889	0.00010981	3.9606e-05	0.0758375	Q86H81	103.1	Q86H81	36.1	Q86H81	32.1
Q8MXQ2	0.696	0.31	0.445	0.097045	0.00098887	0.0360722	Q8MXQ2	100.1	Q8MXQ2	69.7	Q8MXQ2	31
Q54YY2	0.463	0.308	0.665	0.00090187	0.00010015	0.0333159	Q54YY2	98.2	Q54YY2	45.5	Q54YY2	30.2
Q54F34	0.653	0.307	0.469	0.396167	0.032252	0.237603	Q54F34	102.9	Q54F34	67.2	Q54F34	31.5
Q54IS6	0.511	0.307	0.6	0.0113144	0.00140451	0.204004	Q54IS6	102	Q54IS6	52.1	Q54IS6	31.3
Q54Q89	0.351	0.307	0.874	0.0001363	4.031e-05	0.208087	Q54Q89	96.1	Q54Q89	33.7	Q54Q89	29.5
Q54Y14	0.545	0.306	0.561	0.021326	0.00061898	0.047371	Q54Y14	97.2	Q54Y14	53	Q54Y14	29.7
Q54K78	0.802	0.305	0.38	0.616177	0.00593684	0.0570477	Q54K78	110.1	Q54K78	88.3	Q54K78	33.6
Q54TE2	0.478	0.305	0.638	0.0165211	0.00143556	0.142482	Q54TE2	103.6	Q54TE2	49.5	Q54TE2	31.6
Q54IT3	0.661	0.304	0.461	0.149926	0.00292359	0.0730079	Q54IT3	98.6	Q54IT3	65.2	Q54IT3	30
Q54JR9	0.393	0.304	0.774	0.010431	0.00127314	0.192361	Q54JR9	106.1	Q54JR9	41.7	Q54JR9	32.3
Q54P77	0.747	0.304	0.407	0.424037	0.00812253	0.0848975	Q54P77	100	Q54P77	74.7	Q54P77	30.4
Q54CX3	0.795	0.303	0.381	0.718718	0.00911466	0.0667467	Q54CX3	97.5	Q54CX3	77.5	Q54CX3	29.5
Q54LK9	0.746	0.303	0.406	0.591488	0.00851617	0.0729059	Q54LK9	100	Q54LK9	74.6	Q54LK9	30.3
Q54YG0	0.315	0.303	0.963	0.00058969	0.00019557	0.634431	Q54YG0	104.4	Q54YG0	32.9	Q54YG0	31.7
Q55D90	1.105	0.303	0.274	0.999986	0.0460277	0.0974707	Q55D90	100	Q55D90	110.5	Q55D90	30.3
Q55GE4	0.458	0.303	0.661	0.0348658	0.00297891	0.175121	Q55GE4	99.6	Q55GE4	45.6	Q55GE4	30.2
Q54H86	0.748	0.302	0.404	0.460838	0.00653569	0.0716012	Q54H86	100	Q54H86	74.8	Q54H86	30.2
Q86JM6	0.629	0.301	0.478	0.376214	0.0262174	0.208585	Q86JM6	100	Q86JM6	62.9	Q86JM6	30.1
Q54DR1	0.784	0.3	0.383	0.549292	0.00745525	0.0705786	Q54DR1	95.5	Q54DR1	74.8	Q54DR1	28.7
Q54EL0	1.032	0.3	0.291	0.998568	0.0137964	0.0555349	Q54EL0	100.9	Q54EL0	104.2	Q54EL0	30.3
Q54WT8	2.805	0.3	0.107	0.0465757	0.0291302	0.01625	Q54WT8	100	Q54WT8	280.5	Q54WT8	30
Q557K0	0.476	0.3	0.63	0.00065073	5.9547e-05	0.0128044	Q557K0	102.7	Q557K0	48.9	Q557K0	30.8
Q54VY2	0.378	0.296	0.782	0.00010981	3.9606e-05	0.0185036	Q54VY2	102.6	Q54VY2	38.8	Q54VY2	30.3
Q54VR8	0.597	0.295	0.495	0.00985889	0.00019524	0.01625	Q54VR8	100	Q54VR8	59.7	Q54VR8	29.5
Q54BP9	0.375	0.294	0.783	0.00056236	0.00010554	0.082164	Q54BP9	100	Q54BP9	37.5	Q54BP9	29.4
Q54FE7	0.33	0.294	0.89	0.00048247	0.00013843	0.320633	Q54FE7	94.3	Q54FE7	31.1	Q54FE7	27.7
Q54US8	0.659	0.294	0.446	0.177009	0.00325606	0.0729059	Q54US8	100.1	Q54US8	66	Q54US8	29.5
Q54C55	0.717	0.293	0.409	0.355087	0.00510528	0.0705123	Q54C55	98.8	Q54C55	70.9	Q54C55	29
Q54MM0	0.779	0.293	0.376	0.438871	0.00699093	0.0758575	Q54MM0	88.6	Q54MM0	69	Q54MM0	25.9
Q54U86	0.725	0.293	0.403	0.306435	0.00410845	0.0657713	Q54U86	100	Q54U86	72.5	Q54U86	29.3
O96759	0.712	0.292	0.411	0.397106	0.00825634	0.0892551	O96759	100	O96759	71.2	O96759	29.2
Q54RN6	0.496	0.292	0.588	0.066851	0.00249194	0.0953396	Q54RN6	96.5	Q54RN6	47.9	Q54RN6	28.2
Q54TM1	0.677	0.292	0.431	0.176366	0.00407346	0.0847898	Q54TM1	100.8	Q54TM1	68.2	Q54TM1	29.4
Q55D76	0.369	0.292	0.792	0.00790102	0.00121261	0.250309	Q55D76	100	Q55D76	36.9	Q55D76	29.2
Q86B08	1.45	0.292	0.202	0.197087	0.00237579	0.0100214	Q86B08	100	Q86B08	145	Q86B08	29.2
Q86HH3	0.928	0.292	0.315	0.84532	0.00292484	0.0301792	Q86HH3	100.9	Q86HH3	93.6	Q86HH3	29.5
Q54L60	0.585	0.291	0.497	0.0929375	0.00087255	0.0330605	Q54L60	100	Q54L60	58.5	Q54L60	29.1
Q54Y78	0.601	0.291	0.484	0.037711	0.00063071	0.0351632	Q54Y78	100	Q54Y78	60.1	Q54Y78	29.1
Q86AC7	0.755	0.291	0.385	0.39829	0.00704307	0.0802539	Q86AC7	100	Q86AC7	75.5	Q86AC7	29.1
Q1ZXP8	0.414	0.29	0.702	0.00587175	0.00050561	0.0886471	Q1ZXP8	100	Q1ZXP8	41.4	Q1ZXP8	29
Q54W86	0.644	0.29	0.451	0.12805	0.00239483	0.0678143	Q54W86	100	Q54W86	64.4	Q54W86	29
Q8T2K9	0.628	0.29	0.462	0.126354	0.00276232	0.0754441	Q8T2K9	97.5	Q8T2K9	61.3	Q8T2K9	28.3
Q54JB3	0.337	0.288	0.856	0.00010981	3.9606e-05	0.145368	Q54JB3	100	Q54JB3	33.7	Q54JB3	28.8
Q54RA2	0.291	0.287	0.987	0.00020501	6.4792e-05	0.460743	Q54RA2	100	Q54RA2	29.1	Q54RA2	28.7
Q54WT0	0.473	0.287	0.606	0.0964759	0.00592296	0.160593	Q54WT0	100	Q54WT0	47.3	Q54WT0	28.7
Q54CZ3	0.432	0.286	0.663	0.00401189	0.00033551	0.0678691	Q54CZ3	99.3	Q54CZ3	42.9	Q54CZ3	28.5
Q54VJ4	0.455	0.286	0.629	0.00166148	0.00023175	0.0900849	Q54VJ4	92.2	Q54VJ4	42	Q54VJ4	26.4
Q8I7T3	0.945	0.285	0.301	0.999986	0.00584961	0.0340383	Q8I7T3	97.7	Q8I7T3	92.3	Q8I7T3	27.8
P36409	0.748	0.284	0.38	0.168884	0.0004424	0.0144405	P36409	98.2	P36409	73.5	P36409	27.9
Q75JT6	0.237	0.284	1.198	0.00409182	0.00193679	0.986645	Q75JT6	100	Q75JT6	23.7	Q75JT6	28.4
O21035	0.476	0.283	0.594	0.0130255	0.00184623	0.259709	O21035	99.3	O21035	47.2	O21035	28.1
Q54BJ7	0.914	0.283	0.31	0.827066	0.0260943	0.104998	Q54BJ7	89.9	Q54BJ7	82.1	Q54BJ7	25.4
Q54E40	0.269	0.283	1.053	0.00042574	0.00015536	0.794374	Q54E40	100	Q54E40	26.9	Q54E40	28.3
Q54SS0	0.698	0.283	0.406	0.323106	0.00640056	0.0844324	Q54SS0	100	Q54SS0	69.8	Q54SS0	28.3
Q54XZ0	0.615	0.283	0.461	0.162666	0.00423792	0.0906903	Q54XZ0	100	Q54XZ0	61.5	Q54XZ0	28.3
Q55GH1	0.447	0.283	0.632	0.00693576	0.00083702	0.157914	Q55GH1	100.8	Q55GH1	45.1	Q55GH1	28.5
Q76P23	0.707	0.283	0.401	0.423036	0.00892788	0.0902323	Q76P23	100	Q76P23	70.7	Q76P23	28.3
C7G083	0.909	0.282	0.311	0.857185	0.00405972	0.0358545	C7G083	93.2	C7G083	84.7	C7G083	26.3
Q54FB6	0.978	0.282	0.288	0.969689	0.0785125	0.157965	Q54FB6	100	Q54FB6	97.8	Q54FB6	28.2
Q54K01	0.42	0.282	0.672	0.0048646	0.00069534	0.178722	Q54K01	98.8	Q54K01	41.5	Q54K01	27.9
Q54Q75	0.518	0.28	0.54	0.0787645	0.0024734	0.0873128	Q54Q75	100	Q54Q75	51.8	Q54Q75	28
Q54T73	1.295	0.28	0.216	0.635737	0.00430296	0.0192797	Q54T73	99.7	Q54T73	129	Q54T73	27.9
Q54RR4	0.607	0.279	0.459	0.112651	0.00280798	0.0803115	Q54RR4	95.7	Q54RR4	58.1	Q54RR4	26.7
Q9NCL8	0.486	0.279	0.575	0.00297959	0.00014074	0.0199633	Q9NCL8	100	Q9NCL8	48.6	Q9NCL8	27.9
O77229	0.678	0.278	0.41	0.305403	0.00525755	0.0764575	O77229	99	O77229	67.1	O77229	27.5
Q54N85	0.627	0.278	0.443	0.138604	0.00327294	0.081402	Q54N85	100	Q54N85	62.7	Q54N85	27.8
Q54Q49	0.66	0.278	0.422	0.178496	0.00244355	0.0588917	Q54Q49	96.8	Q54Q49	63.9	Q54Q49	27
Q54QU7	0.409	0.278	0.68	0.00818146	0.00077362	0.117554	Q54QU7	103.3	Q54QU7	42.3	Q54QU7	28.8
Q55E31	0.627	0.278	0.444	0.0360792	0.0005528	0.031874	Q55E31	103.3	Q55E31	64.8	Q55E31	28.8
Q55GI4	0.375	0.278	0.742	0.00036928	8.2051e-05	0.0928924	Q55GI4	99.7	Q55GI4	37.4	Q55GI4	27.7
Q54W35	0.576	0.277	0.48	0.126137	0.00397484	0.0984596	Q54W35	100	Q54W35	57.6	Q54W35	27.7
Q86HD0	0.424	0.277	0.654	0.00136791	0.00016523	0.0586051	Q86HD0	100	Q86HD0	42.4	Q86HD0	27.7
Q54VC7	0.435	0.276	0.635	0.00480267	0.00047749	0.0975941	Q54VC7	100	Q54VC7	43.5	Q54VC7	27.6
Q75JR6	0.526	0.276	0.524	0.0401447	0.00252267	0.131097	Q75JR6	101.3	Q75JR6	53.3	Q75JR6	27.9
Q86JP5	0.92	0.276	0.3	0.976476	0.00652501	0.0318812	Q86JP5	96.6	Q86JP5	88.8	Q86JP5	26.6
Q54DE8	0.557	0.275	0.493	0.0839626	0.002736	0.0911848	Q54DE8	100	Q54DE8	55.7	Q54DE8	27.5
Q54HJ3	0.703	0.275	0.392	0.303986	0.0125238	0.136953	Q54HJ3	100.1	Q54HJ3	70.3	Q54HJ3	27.6
Q54MC4	0.543	0.275	0.507	0.053543	0.00162163	0.0751433	Q54MC4	100	Q54MC4	54.3	Q54MC4	27.5
Q54NK3	0.959	0.275	0.286	0.943619	0.00079591	0.0120777	Q54NK3	95.1	Q54NK3	91.3	Q54NK3	26.1
Q558W0	0.403	0.275	0.684	0.00138168	0.00018195	0.0713368	Q558W0	100	Q558W0	40.3	Q558W0	27.5
Q559X6	0.61	0.275	0.45	0.0501828	0.00082903	0.0413557	Q559X6	100	Q559X6	61	Q559X6	27.5
Q55BS8	1.009	0.275	0.272	0.907738	0.0239947	0.0903987	Q55BS8	92.6	Q55BS8	93.4	Q55BS8	25.4
Q8T8P3	0.725	0.275	0.379	0.36546	0.00395362	0.0587265	Q8T8P3	100	Q8T8P3	72.5	Q8T8P3	27.5
Q54R79	0.862	0.274	0.318	0.826344	0.00477392	0.0410942	Q54R79	100	Q54R79	86.2	Q54R79	27.4
Q86H96	0.706	0.274	0.388	0.294917	0.00336841	0.0586051	Q86H96	100	Q86H96	70.6	Q86H96	27.4
Q54KW2	0.447	0.273	0.61	0.072421	0.00540814	0.181126	Q54KW2	100	Q54KW2	44.7	Q54KW2	27.3
Q86HN8	0.323	0.273	0.847	0.00096128	0.00039836	0.981573	Q86HN8	100	Q86HN8	32.3	Q86HN8	27.3
Q86JM0	0.516	0.273	0.529	0.0578611	0.00577499	0.235852	Q86JM0	102.6	Q86JM0	53	Q86JM0	28
Q54JM9	0.305	0.272	0.892	2.5642e-05	5.5644e-06	0.088316	Q54JM9	100	Q54JM9	30.5	Q54JM9	27.2
Q54NX5	0.332	0.272	0.819	0.00023076	7.2666e-05	0.428752	Q54NX5	100.3	Q54NX5	33.3	Q54NX5	27.3
Q54N25	0.446	0.271	0.607	0.00666695	0.00093794	0.200576	Q54N25	113.6	Q54N25	50.7	Q54N25	30.8
Q54SV1	0.471	0.271	0.575	0.00846487	0.0005285	0.0708994	Q54SV1	97	Q54SV1	45.7	Q54SV1	26.3
Q54DN0	0.6	0.27	0.45	0.106691	0.00256141	0.0767392	Q54DN0	100	Q54DN0	60	Q54DN0	27
Q54FF5	0.593	0.27	0.455	0.217445	0.00595647	0.0988949	Q54FF5	91.8	Q54FF5	54.4	Q54FF5	24.8
Q54VX1	0.609	0.27	0.443	0.22517	0.0076089	0.113854	Q54VX1	95.2	Q54VX1	58	Q54VX1	25.7
Q8T690	1.019	0.27	0.265	0.999986	0.014679	0.0541899	Q8T690	100	Q8T690	101.9	Q8T690	27
Q54RX9	0.744	0.269	0.361	0.107023	0.00027471	0.0105875	Q54RX9	100	Q54RX9	74.4	Q54RX9	26.9
Q55DD1	0.447	0.269	0.603	0.00321557	0.00035001	0.0897629	Q55DD1	100	Q55DD1	44.7	Q55DD1	26.9
Q1ZXD9	0.495	0.267	0.539	0.00737747	0.00026004	0.0284318	Q1ZXD9	100	Q1ZXD9	49.5	Q1ZXD9	26.7
Q54MJ7	0.265	0.267	1.007	3.8825e-06	7.6546e-07	0.541331	Q54MJ7	100	Q54MJ7	26.5	Q54MJ7	26.7
Q55AC2	0.972	0.267	0.275	0.999986	0.0031532	0.0244642	Q55AC2	100	Q55AC2	97.2	Q55AC2	26.7
Q55ED8	0.395	0.267	0.676	0.0006623	0.00012123	0.0831936	Q55ED8	100	Q55ED8	39.5	Q55ED8	26.7
Q9NH03	0.593	0.267	0.451	0.16112	0.00459798	0.0964769	Q9NH03	104.3	Q9NH03	61.8	Q9NH03	27.9
Q54BC0	0.602	0.266	0.441	0.179472	0.0185332	0.29138	Q54BC0	101.6	Q54BC0	61.2	Q54BC0	27
Q54CN4	0.482	0.266	0.551	0.0225172	0.00241954	0.203899	Q54CN4	131.5	Q54CN4	63.4	Q54CN4	35
Q54D09	0.387	0.266	0.688	0.00557994	0.0004372	0.0754441	Q54D09	100	Q54D09	38.7	Q54D09	26.6
Q550P3	0.599	0.266	0.444	0.215077	0.00593435	0.0992513	Q550P3	100	Q550P3	59.9	Q550P3	26.6
Q54LK1	0.604	0.265	0.439	0.202054	0.00545638	0.0967651	Q54LK1	99.1	Q54LK1	59.9	Q54LK1	26.3
Q54LP7	0.764	0.265	0.346	0.420335	0.0157096	0.129391	Q54LP7	109.5	Q54LP7	83.7	Q54LP7	29
P13773	1.621	0.264	0.163	0.653745	0.0338874	0.0495532	P13773	74.7	P13773	121.2	P13773	19.8
Q54CT9	0.811	0.263	0.325	0.468622	0.00184173	0.031357	Q54CT9	102.4	Q54CT9	83	Q54CT9	27
Q54DZ2	0.585	0.263	0.45	0.0976589	0.00225405	0.0734646	Q54DZ2	100	Q54DZ2	58.5	Q54DZ2	26.3
Q54EM7	0.533	0.263	0.494	0.286217	0.0136762	0.153389	Q54EM7	99.4	Q54EM7	53	Q54EM7	26.2
Q54FL5	0.29	0.263	0.907	0.00073903	0.00021025	0.407743	Q54FL5	100	Q54FL5	29	Q54FL5	26.3
Q55EH0	0.678	0.263	0.388	0.12566	0.00075156	0.0257956	Q55EH0	100	Q55EH0	67.8	Q55EH0	26.3
Q54BK7	0.591	0.262	0.443	0.0626163	0.00113071	0.0503777	Q54BK7	99.3	Q54BK7	58.7	Q54BK7	26
Q54TR4	0.456	0.262	0.574	0.043853	0.00344438	0.169783	Q54TR4	75.1	Q54TR4	34.3	Q54TR4	19.7
Q55DI9	0.394	0.262	0.665	0.0030144	0.00033146	0.0874104	Q55DI9	98.5	Q55DI9	38.8	Q55DI9	25.8
Q9BPU3	0.397	0.262	0.66	0.00173543	0.0001963	0.0616641	Q9BPU3	97.4	Q9BPU3	38.7	Q9BPU3	25.5
Q54FX5	0.47	0.261	0.555	0.0377196	0.00315454	0.174357	Q54FX5	100.6	Q54FX5	47.3	Q54FX5	26.2
Q54KL4	0.88	0.261	0.297	0.711281	0.0456821	0.176657	Q54KL4	100	Q54KL4	88	Q54KL4	26.1
Q54TP9	0.441	0.261	0.592	0.0158592	0.00146208	0.151095	Q54TP9	100.6	Q54TP9	44.3	Q54TP9	26.3
Q550H5	0.854	0.261	0.306	0.440981	0.00065087	0.0147646	Q550H5	99.3	Q550H5	84.7	Q550H5	25.9
Q55G25	0.428	0.261	0.61	0.00644588	0.00036695	0.0525978	Q55G25	103.2	Q55G25	44.2	Q55G25	26.9
Q55GF0	0.217	0.261	1.201	0.0101304	0.00563065	0.993098	Q55GF0	100	Q55GF0	21.7	Q55GF0	26.1
Q65YR7	0.665	0.261	0.393	0.559473	0.0390177	0.201045	Q65YR7	100	Q65YR7	66.5	Q65YR7	26.1
P20790	0.796	0.26	0.327	0.278315	0.00028911	0.00863498	P20790	100	P20790	79.6	P20790	26
Q54C61	0.703	0.26	0.37	0.505298	0.00600165	0.0647682	Q54C61	99.4	Q54C61	70	Q54C61	25.9
Q54JQ5	0.479	0.26	0.542	0.0270291	0.00108593	0.0746058	Q54JQ5	100	Q54JQ5	47.9	Q54JQ5	26
Q54T88	0.717	0.26	0.363	0.308041	0.00523263	0.0758644	Q54T88	103.6	Q54T88	74.3	Q54T88	27
Q54TP6	0.422	0.26	0.617	0.00147135	0.00012831	0.0309246	Q54TP6	100	Q54TP6	42.2	Q54TP6	26
Q8T126	0.604	0.26	0.43	0.14917	0.00445965	0.098262	Q8T126	100	Q8T126	60.4	Q8T126	26
C7G041	0.653	0.258	0.395	0.133355	0.0025773	0.0704313	C7G041	103.8	C7G041	67.8	C7G041	26.8
Q54BX7	0.603	0.258	0.427	0.141046	0.00305743	0.0766271	Q54BX7	100	Q54BX7	60.3	Q54BX7	25.8
Q54GY8	0.53	0.258	0.486	0.0229181	0.00109365	0.0822345	Q54GY8	100	Q54GY8	53	Q54GY8	25.8
Q54HK2	0.469	0.258	0.549	0.0107399	0.00059727	0.070097	Q54HK2	99.3	Q54HK2	46.6	Q54HK2	25.6
Q54P57	0.762	0.258	0.339	0.339889	0.00045054	0.0120047	Q54P57	93.4	Q54P57	71.2	Q54P57	24.1
Q554F5	0.497	0.258	0.52	0.00950836	0.00035175	0.0371706	Q554F5	98.9	Q554F5	49.1	Q554F5	25.6
Q557F6	0.448	0.258	0.576	0.00339395	0.00015371	0.0216062	Q557F6	100	Q557F6	44.8	Q557F6	25.8
Q54L98	0.837	0.257	0.308	0.776355	0.0304436	0.122234	Q54L98	100	Q54L98	83.7	Q54L98	25.7
Q54QR3	0.65	0.257	0.395	0.024578	0.0001968	0.0113183	Q54QR3	99.5	Q54QR3	64.7	Q54QR3	25.5
Q86AD3	0.622	0.257	0.413	0.133522	0.0012165	0.0381481	Q86AD3	100	Q86AD3	62.2	Q86AD3	25.7
Q86KB4	0.445	0.257	0.577	0.133717	0.00799121	0.167363	Q86KB4	100	Q86KB4	44.5	Q86KB4	25.7
Q54DT9	0.58	0.256	0.441	0.12805	0.00263378	0.0729059	Q54DT9	100	Q54DT9	58	Q54DT9	25.6
Q86JE3	0.496	0.256	0.517	0.0262496	0.00083171	0.0577044	Q86JE3	99	Q86JE3	49.1	Q86JE3	25.4
Q54N80	0.837	0.255	0.305	0.621317	0.0348781	0.166778	Q54N80	102.7	Q54N80	86	Q54N80	26.2
Q54C64	0.524	0.254	0.486	0.012371	0.00048325	0.0487978	Q54C64	100	Q54C64	52.4	Q54C64	25.4
Q54MD6	0.53	0.254	0.479	0.0184955	0.0007343	0.0619243	Q54MD6	102.6	Q54MD6	54.4	Q54MD6	26.1
Q54U91	1.016	0.254	0.25	0.998489	0.00344277	0.0246714	Q54U91	100	Q54U91	101.6	Q54U91	25.4
Q54XH8	0.782	0.254	0.325	0.365663	0.0111876	0.111528	Q54XH8	100	Q54XH8	78.2	Q54XH8	25.4
Q86B20	0.896	0.254	0.284	0.799824	0.0150998	0.0803607	Q86B20	100	Q86B20	89.6	Q86B20	25.4
Q8MXL9	0.619	0.254	0.41	0.00949339	8.8551e-05	0.00715827	Q8MXL9	102.7	Q8MXL9	63.5	Q8MXL9	26.1
Q54C86	0.291	0.253	0.871	0.00051607	0.00015373	0.408088	Q54C86	102.7	Q54C86	29.8	Q54C86	26
Q54T29	0.684	0.253	0.369	0.316871	0.0189364	0.182901	Q54T29	100	Q54T29	68.4	Q54T29	25.3
Q54XV0	1.13	0.253	0.224	0.999986	0.0105101	0.0447239	Q54XV0	100.3	Q54XV0	113.3	Q54XV0	25.4
Q8MMQ2	0.498	0.253	0.508	0.0125274	0.0005274	0.0537072	Q8MMQ2	98.4	Q8MMQ2	49	Q8MMQ2	24.9
P34139	0.639	0.252	0.394	0.129194	0.00128572	0.0406756	P34139	100	P34139	63.9	P34139	25.2
Q54G07	0.322	0.252	0.783	0.00010981	3.9606e-05	0.0254224	Q54G07	100	Q54G07	32.2	Q54G07	25.2
Q54N40	0.588	0.252	0.428	0.0819723	0.00140271	0.0538429	Q54N40	100.7	Q54N40	59.2	Q54N40	25.4
Q54NU2	0.67	0.252	0.376	0.111986	0.00058512	0.0219636	Q54NU2	101.8	Q54NU2	68.2	Q54NU2	25.6
Q54QD5	0.917	0.252	0.275	0.765671	0.00164992	0.0231461	Q54QD5	100	Q54QD5	91.7	Q54QD5	25.2
Q552H9	1.023	0.252	0.246	0.998958	0.00348045	0.0267135	Q552H9	98.1	Q552H9	100.4	Q552H9	24.7
Q55BC7	0.472	0.252	0.535	0.00490105	0.00030447	0.0489494	Q55BC7	100	Q55BC7	47.2	Q55BC7	25.2
Q54HL1	0.718	0.251	0.35	0.446313	0.0284544	0.192095	Q54HL1	100	Q54HL1	71.8	Q54HL1	25.1
Q557K5	0.612	0.251	0.41	0.162106	0.00330628	0.0759677	Q557K5	100	Q557K5	61.2	Q557K5	25.1
Q55G26	0.503	0.251	0.498	0.00667214	0.00044104	0.0662263	Q55G26	83.9	Q55G26	42.2	Q55G26	21
Q9GNF0	0.611	0.251	0.411	0.166019	0.00300881	0.071124	Q9GNF0	100	Q9GNF0	61.1	Q9GNF0	25.1
Q1ZXE4	0.487	0.25	0.514	0.00508024	0.00022386	0.0284418	Q1ZXE4	103.1	Q1ZXE4	50.2	Q1ZXE4	25.8
Q54CL3	0.65	0.25	0.384	0.211593	0.00345701	0.0700035	Q54CL3	99.3	Q54CL3	64.6	Q54CL3	24.8
Q54PD6	0.774	0.25	0.323	0.376688	0.00084023	0.0195269	Q54PD6	98.7	Q54PD6	76.4	Q54PD6	24.6
Q54QY9	0.625	0.25	0.4	0.12273	0.00175739	0.0540539	Q54QY9	100	Q54QY9	62.5	Q54QY9	25
Q54SC3	0.386	0.25	0.647	0.00023076	4.031e-05	0.0133799	Q54SC3	115.4	Q54SC3	44.6	Q54SC3	28.9
Q54Z16	0.542	0.25	0.461	0.0407824	0.00160347	0.0856279	Q54Z16	100.6	Q54Z16	54.5	Q54Z16	25.2
Q54CG0	1.114	0.249	0.223	0.969037	0.00316212	0.0220651	Q54CG0	97	Q54CG0	108.1	Q54CG0	24.1
Q54FL2	0.625	0.249	0.399	0.0683239	0.00046432	0.0209169	Q54FL2	100	Q54FL2	62.5	Q54FL2	24.9
Q54T65	0.551	0.249	0.451	0.170129	0.0151147	0.251007	Q54T65	100.3	Q54T65	55.3	Q54T65	24.9
Q54VZ2	0.897	0.249	0.277	0.803449	0.00190435	0.024519	Q54VZ2	100	Q54VZ2	89.7	Q54VZ2	24.9
Q54Y52	0.908	0.249	0.274	0.765671	0.0264413	0.113162	Q54Y52	99.6	Q54Y52	90.5	Q54Y52	24.8
Q556M4	0.834	0.249	0.299	0.599068	0.0379305	0.182951	Q556M4	100	Q556M4	83.4	Q556M4	24.9
Q869W1	0.369	0.249	0.674	0.00129943	0.00016652	0.0640085	Q869W1	102.3	Q869W1	37.8	Q869W1	25.5
Q54DW9	0.341	0.248	0.725	0.0300548	0.00654505	0.514695	Q54DW9	110.5	Q54DW9	37.7	Q54DW9	27.3
Q54H87	0.872	0.248	0.284	0.67573	0.0511878	0.203692	Q54H87	100	Q54H87	87.2	Q54H87	24.8
Q54M88	0.329	0.248	0.755	0.00174102	0.00046432	0.480846	Q54M88	101.1	Q54M88	33.2	Q54M88	25.1
Q55CT6	0.707	0.248	0.35	0.261667	0.00162044	0.0360337	Q55CT6	100	Q55CT6	70.7	Q55CT6	24.8
Q86IY4	0.573	0.248	0.432	0.14428	0.00398283	0.0917397	Q86IY4	100	Q86IY4	57.3	Q86IY4	24.8
P54679	1.029	0.247	0.24	0.999986	0.00571038	0.0339492	P54679	94.4	P54679	97.1	P54679	23.3
Q54EA4	0.496	0.247	0.498	0.0112362	0.00044789	0.047144	Q54EA4	100	Q54EA4	49.6	Q54EA4	24.7
Q54EY9	0.504	0.247	0.49	0.0403871	0.00150767	0.0811489	Q54EY9	100	Q54EY9	50.4	Q54EY9	24.7
Q54TF9	0.812	0.247	0.304	0.55743	0.0229695	0.1365	Q54TF9	101.3	Q54TF9	82.3	Q54TF9	25
Q54XP9	0.669	0.247	0.37	0.248339	0.00109484	0.0273676	Q54XP9	99	Q54XP9	66.3	Q54XP9	24.5
Q8MXQ3	0.688	0.247	0.359	0.211514	0.00434614	0.0808563	Q8MXQ3	96.3	Q8MXQ3	66.3	Q8MXQ3	23.8
Q54E89	0.589	0.246	0.418	0.153607	0.00273286	0.0686121	Q54E89	99	Q54E89	58.4	Q54E89	24.4
Q54GM8	0.789	0.246	0.311	0.793761	0.00190435	0.0246714	Q54GM8	96.3	Q54GM8	76	Q54GM8	23.7
Q54IS5	0.403	0.246	0.61	0.105838	0.00980716	0.244985	Q54IS5	100	Q54IS5	40.3	Q54IS5	24.6
Q55DN4	0.486	0.246	0.506	0.0179956	0.0007239	0.0619243	Q55DN4	106.7	Q55DN4	51.8	Q55DN4	26.2
Q75JN1	0.737	0.246	0.334	0.259566	0.0018978	0.0412354	Q75JN1	100	Q75JN1	73.7	Q75JN1	24.6
Q8T9W1	0.519	0.246	0.475	0.0146992	0.0004594	0.0404562	Q8T9W1	101.9	Q8T9W1	52.9	Q8T9W1	25.1
Q54G71	1	0.245	0.245	0.981171	0.0024199	0.0194886	Q54G71	98.1	Q54G71	98	Q54G71	24
Q556C6	0.763	0.245	0.32	0.57396	0.00419369	0.0484735	Q556C6	95.1	Q556C6	72.6	Q556C6	23.2
Q556W2	0.894	0.245	0.274	0.905604	0.00712054	0.0477698	Q556W2	99.6	Q556W2	89.1	Q556W2	24.4
Q86AG5	0.291	0.245	0.842	0.00019921	4.9991e-05	0.113242	Q86AG5	100	Q86AG5	29.1	Q86AG5	24.5
Q54CX4	0.705	0.244	0.347	0.147684	0.00069116	0.0231247	Q54CX4	93.8	Q54CX4	66.2	Q54CX4	22.9
Q54EK3	1.007	0.244	0.242	0.990591	0.00369527	0.0284418	Q54EK3	101.4	Q54EK3	102.1	Q54EK3	24.7
Q54IV4	0.379	0.244	0.644	0.0110654	0.00079098	0.0953543	Q54IV4	100	Q54IV4	37.9	Q54IV4	24.4
Q54KN2	0.359	0.244	0.681	0.00287446	0.00026043	0.0613326	Q54KN2	101.8	Q54KN2	36.5	Q54KN2	24.9
Q54LY6	0.971	0.244	0.251	0.827772	0.0363458	0.127314	Q54LY6	76.4	Q54LY6	74.1	Q54LY6	18.6
Q55EI7	0.694	0.243	0.35	0.590965	0.0188485	0.113973	Q55EI7	98.4	Q55EI7	68.3	Q55EI7	23.9
Q58A41	0.624	0.243	0.389	0.171445	0.00346861	0.076542	Q58A41	98.3	Q58A41	61.4	Q58A41	23.9
Q6B9X6	0.863	0.243	0.281	0.821632	0.00203616	0.0249762	Q6B9X6	95.6	Q6B9X6	82.5	Q6B9X6	23.2
Q86KR0	1.467	0.243	0.165	0.468998	0.00836719	0.0230167	Q86KR0	88.3	Q86KR0	129.6	Q86KR0	21.4
P34140	0.802	0.242	0.302	0.368033	0.00042913	0.0113183	P34140	97.9	P34140	78.5	P34140	23.7
Q54HR7	0.955	0.242	0.253	0.967306	0.00455334	0.0333756	Q54HR7	100	Q54HR7	95.5	Q54HR7	24.2
Q54IC9	0.778	0.242	0.311	0.555483	0.0363544	0.191084	Q54IC9	100	Q54IC9	77.8	Q54IC9	24.2
Q54X09	0.745	0.242	0.325	0.346063	0.0074447	0.0898062	Q54X09	94.1	Q54X09	70.1	Q54X09	22.8
Q54T95	0.783	0.241	0.309	0.514118	0.0147143	0.108051	Q54T95	102.2	Q54T95	80	Q54T95	24.7
Q54VZ3	0.738	0.241	0.326	0.333636	0.00329774	0.0541899	Q54VZ3	100	Q54VZ3	73.8	Q54VZ3	24.1
Q54WQ4	0.403	0.241	0.598	0.0233372	0.00256596	0.212631	Q54WQ4	105.2	Q54WQ4	42.4	Q54WQ4	25.3
Q54WW9	0.756	0.241	0.319	0.349403	0.0093502	0.102931	Q54WW9	100	Q54WW9	75.6	Q54WW9	24.1
Q75JL8	0.574	0.241	0.42	0.126644	0.00327557	0.0853887	Q75JL8	100	Q75JL8	57.4	Q75JL8	24.1
Q54ET0	1.079	0.24	0.222	0.990041	0.00671705	0.0331208	Q54ET0	96.6	Q54ET0	104.2	Q54ET0	23.2
Q54F92	0.428	0.24	0.56	0.00656748	0.00044858	0.0686541	Q54F92	102.2	Q54F92	43.8	Q54F92	24.5
Q55CJ8	0.765	0.24	0.313	0.448132	0.0252113	0.174469	Q55CJ8	100	Q55CJ8	76.5	Q55CJ8	24
Q86JD4	0.783	0.24	0.306	0.583927	0.0136604	0.0959252	Q86JD4	96.3	Q86JD4	75.4	Q86JD4	23.1
Q54G35	0.587	0.239	0.408	0.0739241	0.0009655	0.0398132	Q54G35	100.5	Q54G35	59	Q54G35	24.1
Q54L26	0.41	0.239	0.583	0.0713066	0.00530718	0.179796	Q54L26	100	Q54L26	41	Q54L26	23.9
Q54LK8	0.567	0.239	0.421	0.150494	0.00131802	0.0387944	Q54LK8	98.1	Q54LK8	55.6	Q54LK8	23.4
Q54QY8	1.074	0.239	0.223	0.999225	0.00359685	0.0251272	Q54QY8	100	Q54QY8	107.4	Q54QY8	23.9
Q54RF6	0.529	0.239	0.451	0.0467197	0.0005589	0.0284918	Q54RF6	100	Q54RF6	52.9	Q54RF6	23.9
Q556R8	0.327	0.239	0.731	0.00016663	3.9992e-05	0.0324735	Q556R8	106.2	Q556R8	34.7	Q556R8	25.3
Q6S000	0.483	0.239	0.494	0.0202119	0.00078824	0.0635919	Q6S000	100.3	Q6S000	48.4	Q6S000	23.9
P16051	0.771	0.238	0.309	0.682179	0.0031532	0.0360337	P16051	100	P16051	77.1	P16051	23.8
Q55FZ9	0.647	0.238	0.368	0.155785	0.00415037	0.0911848	Q55FZ9	106.1	Q55FZ9	68.7	Q55FZ9	25.3
Q86K43	0.445	0.238	0.535	0.00191811	0.00018023	0.0465621	Q86K43	100	Q86K43	44.5	Q86K43	23.8
Q86KX9	1.115	0.238	0.214	0.905944	0.00421274	0.0235027	Q86KX9	101.8	Q86KX9	113.5	Q86KX9	24.3
P0CD60	0.776	0.237	0.305	0.518641	0.00232612	0.0343539	P0CD60	100	P0CD60	77.6	P0CD60	23.7
Q54ID5	0.904	0.237	0.263	0.924455	0.00502477	0.0375729	Q54ID5	92.8	Q54ID5	83.8	Q54ID5	22
Q54Q56	0.542	0.237	0.439	0.0348081	0.00096047	0.0571768	Q54Q56	100	Q54Q56	54.2	Q54Q56	23.7
Q54W97	0.398	0.237	0.595	0.0527727	0.00583427	0.259898	Q54W97	100	Q54W97	39.8	Q54W97	23.7
P36408	0.66	0.236	0.358	0.092955	0.00059116	0.0235027	P36408	100	P36408	66	P36408	23.6
Q54DF4	0.58	0.236	0.407	0.0676179	0.00061511	0.0271574	Q54DF4	102.7	Q54DF4	59.6	Q54DF4	24.3
Q54GP6	0.633	0.236	0.373	0.293206	0.0113763	0.130651	Q54GP6	95.2	Q54GP6	60.3	Q54GP6	22.5
Q550G0	0.62	0.236	0.381	0.156205	0.00214844	0.0565797	Q550G0	96.6	Q550G0	59.8	Q550G0	22.8
Q55FJ4	0.48	0.236	0.491	0.0127346	0.00073828	0.0787879	Q55FJ4	88.9	Q55FJ4	42.7	Q55FJ4	21
Q55G63	0.832	0.236	0.284	0.599818	0.00119524	0.0211518	Q55G63	102.7	Q55G63	85.5	Q55G63	24.3
Q8MMR8	0.485	0.236	0.486	0.0151942	0.00057751	0.0529481	Q8MMR8	101.4	Q8MMR8	49.2	Q8MMR8	23.9
Q54GQ6	0.566	0.235	0.415	0.097849	0.00208781	0.0691399	Q54GQ6	100	Q54GQ6	56.6	Q54GQ6	23.5
Q54K22	0.726	0.235	0.323	0.391334	0.015728	0.136068	Q54K22	100	Q54K22	72.6	Q54K22	23.5
Q54QH3	0.572	0.235	0.41	0.0887796	0.00371168	0.111618	Q54QH3	98.3	Q54QH3	56.2	Q54QH3	23.1
Q54UD0	0.86	0.235	0.273	0.752701	0.0209616	0.101336	Q54UD0	102.3	Q54UD0	88	Q54UD0	24.1
Q86H60	0.591	0.235	0.397	0.191204	0.00502817	0.0938928	Q86H60	99.7	Q86H60	58.9	Q86H60	23.4
Q86HX3	0.487	0.235	0.483	0.054428	0.00129359	0.0608868	Q86HX3	98.2	Q86HX3	47.8	Q86HX3	23.1
Q54HR9	0.534	0.234	0.437	0.0917885	0.00337052	0.102787	Q54HR9	97.9	Q54HR9	52.3	Q54HR9	22.9
Q54K44	0.902	0.234	0.26	0.977163	0.00635975	0.0395334	Q54K44	90.9	Q54K44	81.9	Q54K44	21.3
Q54PA2	0.567	0.234	0.413	0.134215	0.00267155	0.071892	Q54PA2	100	Q54PA2	56.7	Q54PA2	23.4
Q54QL9	0.424	0.234	0.55	0.0458417	0.00237116	0.111924	Q54QL9	99.5	Q54QL9	42.3	Q54QL9	23.3
Q54X97	0.827	0.234	0.284	0.63848	0.0119308	0.0835838	Q54X97	100	Q54X97	82.7	Q54X97	23.4
Q55BN8	0.643	0.234	0.363	0.185963	0.00377909	0.0779022	Q55BN8	100	Q55BN8	64.3	Q55BN8	23.4
Q55DS5	0.692	0.234	0.338	0.274225	0.00151923	0.033775	Q55DS5	99	Q55DS5	68.5	Q55DS5	23.1
Q9Y1W0	0.589	0.234	0.397	0.307805	0.0510158	0.449513	Q9Y1W0	100	Q9Y1W0	58.9	Q9Y1W0	23.4
Q54BV1	0.413	0.233	0.563	0.0014707	0.00012777	0.0306101	Q54BV1	102.4	Q54BV1	42.3	Q54BV1	23.8
Q54WK9	0.701	0.233	0.332	0.346997	0.00366718	0.05707	Q54WK9	98.5	Q54WK9	69.1	Q54WK9	22.9
Q55D78	0.711	0.233	0.328	0.324306	0.0211894	0.197633	Q55D78	83.4	Q55D78	59.3	Q55D78	19.4
Q55EF7	0.755	0.233	0.309	0.279965	0.00086973	0.0224531	Q55EF7	103.6	Q55EF7	78.2	Q55EF7	24.1
B0G0Y8	0.412	0.232	0.564	0.00166148	0.00012947	0.0273676	B0G0Y8	100	B0G0Y8	41.2	B0G0Y8	23.2
C7G026	0.769	0.232	0.302	0.337724	0.00789391	0.0941385	C7G026	100.8	C7G026	77.6	C7G026	23.4
Q54G63	0.89	0.232	0.261	0.832348	0.00126763	0.0182778	Q54G63	102.3	Q54G63	91	Q54G63	23.8
Q54HH9	0.714	0.232	0.325	0.382455	0.0164328	0.143508	Q54HH9	84.8	Q54HH9	60.6	Q54HH9	19.7
Q54U08	0.76	0.232	0.305	0.39897	0.0010069	0.0219636	Q54U08	100	Q54U08	76	Q54U08	23.2
Q54UB6	1.016	0.232	0.228	0.999986	0.0011711	0.0133837	Q54UB6	99.6	Q54UB6	101.2	Q54UB6	23.1
Q54VK1	0.366	0.232	0.634	0.0557108	0.00649674	0.278789	Q54VK1	100	Q54VK1	36.6	Q54VK1	23.2
Q54VY0	0.686	0.232	0.339	0.290917	0.00455622	0.0721779	Q54VY0	97	Q54VY0	66.5	Q54VY0	22.5
Q555E8	0.546	0.232	0.426	0.153595	0.012271	0.223908	Q555E8	100	Q555E8	54.6	Q555E8	23.2
Q86IF9	0.539	0.232	0.43	0.159737	0.0134085	0.235988	Q86IF9	100	Q86IF9	53.9	Q86IF9	23.2
Q54H73	0.493	0.231	0.469	0.0204043	0.00138039	0.113106	Q54H73	99.6	Q54H73	49.1	Q54H73	23
Q54P23	0.692	0.231	0.334	0.408685	0.0391968	0.273459	Q54P23	100.6	Q54P23	69.6	Q54P23	23.3
Q54RN4	0.573	0.231	0.403	0.180297	0.0042962	0.0873128	Q54RN4	84.1	Q54RN4	48.1	Q54RN4	19.4
Q54Y03	0.602	0.231	0.384	0.157207	0.00898346	0.165655	Q54Y03	100	Q54Y03	60.2	Q54Y03	23.1
Q551L2	0.382	0.231	0.605	0.0100634	0.00136296	0.224066	Q551L2	100	Q551L2	38.2	Q551L2	23.1
Q55EF0	0.583	0.231	0.396	0.0516071	0.00078412	0.0383631	Q55EF0	100	Q55EF0	58.3	Q55EF0	23.1
Q86AD8	0.826	0.231	0.279	0.465337	0.00442896	0.0556109	Q86AD8	100	Q86AD8	82.6	Q86AD8	23.1
B0G183	0.807	0.23	0.284	0.583219	0.0255707	0.142319	B0G183	100	B0G183	80.7	B0G183	23
Q54JA3	0.694	0.23	0.331	0.423634	0.00190327	0.0331208	Q54JA3	100	Q54JA3	69.4	Q54JA3	23
Q54R62	0.6	0.23	0.382	0.212493	0.00326869	0.0669924	Q54R62	100	Q54R62	60	Q54R62	23
Q54U89	0.825	0.23	0.278	0.820285	0.0109833	0.0667467	Q54U89	100	Q54U89	82.5	Q54U89	23
Q54VH1	0.606	0.23	0.38	0.0739898	0.00079861	0.033272	Q54VH1	99.9	Q54VH1	60.5	Q54VH1	23
Q556S2	0.715	0.23	0.321	0.35438	0.014323	0.136142	Q556S2	100.8	Q556S2	72	Q556S2	23.2
Q558K8	0.586	0.23	0.393	0.190471	0.00675854	0.115203	Q558K8	102.9	Q558K8	60.3	Q558K8	23.7
Q55D94	0.757	0.23	0.304	0.495093	0.0262766	0.166045	Q55D94	97.6	Q55D94	73.9	Q55D94	22.5
Q86AF6	0.584	0.23	0.393	0.209139	0.0142939	0.200576	Q86AF6	100	Q86AF6	58.4	Q86AF6	23
Q8T2T7	0.389	0.23	0.592	0.00063391	7.5152e-05	0.0250447	Q8T2T7	100	Q8T2T7	38.9	Q8T2T7	23
Q9BKJ9	0.888	0.23	0.259	0.891656	0.00466287	0.0375187	Q9BKJ9	98.1	Q9BKJ9	87.2	Q9BKJ9	22.5
Q54V92	0.769	0.229	0.297	0.430581	0.00192519	0.0331208	Q54V92	100.9	Q54V92	77.6	Q54V92	23.1
Q54XJ2	0.388	0.229	0.59	0.0348939	0.00476486	0.307891	Q54XJ2	100	Q54XJ2	38.8	Q54XJ2	22.9
Q55GJ2	0.583	0.229	0.393	0.185724	0.01336	0.207596	Q55GJ2	100	Q55GJ2	58.3	Q55GJ2	22.9
C7FZW2	0.562	0.228	0.405	0.0536835	0.0003485	0.0166384	C7FZW2	100	C7FZW2	56.2	C7FZW2	22.8
P34043	0.849	0.228	0.269	0.772579	0.00213443	0.026708	P34043	100	P34043	84.9	P34043	22.8
Q54CR1	0.66	0.228	0.345	0.14151	0.00122158	0.0371706	Q54CR1	100	Q54CR1	66	Q54CR1	22.8
Q54IP5	0.772	0.228	0.295	0.222537	0.00049065	0.0146213	Q54IP5	100	Q54IP5	77.2	Q54IP5	22.8
Q54RD7	0.533	0.228	0.428	0.0619385	0.00162163	0.0700861	Q54RD7	100	Q54RD7	53.3	Q54RD7	22.8
Q558Y5	0.572	0.228	0.398	0.0229108	0.00049265	0.034203	Q558Y5	98.7	Q558Y5	56.5	Q558Y5	22.5
Q86A18	0.396	0.228	0.575	0.0713804	0.0029668	0.105861	Q86A18	99.5	Q86A18	39.4	Q86A18	22.7
Q54IN0	0.862	0.227	0.264	0.999248	0.00494941	0.0321347	Q54IN0	100	Q54IN0	86.2	Q54IN0	22.7
Q54NE5	0.628	0.227	0.361	0.151256	0.00085578	0.0271117	Q54NE5	101	Q54NE5	63.4	Q54NE5	22.9
Q54TZ8	0.59	0.227	0.384	0.0614342	0.0011123	0.050163	Q54TZ8	100	Q54TZ8	59	Q54TZ8	22.7
Q55BE9	0.885	0.227	0.257	0.620438	0.0159734	0.10055	Q55BE9	98.9	Q55BE9	87.5	Q55BE9	22.5
Q55GJ9	0.841	0.227	0.27	0.536685	0.0141794	0.103281	Q55GJ9	101.2	Q55GJ9	85.1	Q55GJ9	23
Q55BR2	0.401	0.226	0.564	0.00746498	0.00058299	0.0877706	Q55BR2	100.5	Q55BR2	40.3	Q55BR2	22.8
Q55DE2	0.439	0.226	0.514	0.0422278	0.00210526	0.106916	Q55DE2	97.6	Q55DE2	42.9	Q55DE2	22
Q55EP5	0.513	0.226	0.44	0.0308389	0.00075557	0.0480005	Q55EP5	100	Q55EP5	51.3	Q55EP5	22.6
Q55GQ9	0.417	0.226	0.541	0.0355338	0.00388609	0.235207	Q55GQ9	97.8	Q55GQ9	40.8	Q55GQ9	22.1
Q54BD7	0.392	0.225	0.573	0.00019755	3.9606e-05	0.00784068	Q54BD7	100	Q54BD7	39.2	Q54BD7	22.5
Q54CY5	0.393	0.225	0.573	0.0310402	0.00310213	0.203563	Q54CY5	106.4	Q54CY5	41.8	Q54CY5	24
Q54GR8	0.659	0.225	0.341	0.399643	0.00143962	0.0279974	Q54GR8	100	Q54GR8	65.9	Q54GR8	22.5
Q54R07	0.249	0.225	0.904	0.0078048	0.00137508	0.318165	Q54R07	83.6	Q54R07	20.8	Q54R07	18.8
Q55AR1	0.822	0.225	0.274	0.738893	0.00257632	0.0309246	Q55AR1	98.3	Q55AR1	80.8	Q55AR1	22.2
Q55BC2	0.478	0.225	0.47	0.0190768	0.0008695	0.0734646	Q55BC2	100	Q55BC2	47.8	Q55BC2	22.5
Q55EQ9	0.606	0.225	0.371	0.0456951	0.00104188	0.0540539	Q55EQ9	105	Q55EQ9	63.6	Q55EQ9	23.6
Q86JC9	0.516	0.225	0.436	0.0508869	0.0010567	0.0522529	Q86JC9	100	Q86JC9	51.6	Q86JC9	22.5
Q86JK8	0.413	0.225	0.544	0.0176291	0.00083821	0.0741975	Q86JK8	91.7	Q86JK8	37.9	Q86JK8	20.6
Q54N72	0.344	0.224	0.652	0.0538888	0.010212	0.471323	Q54N72	100	Q54N72	34.4	Q54N72	22.4
Q54XK2	0.775	0.224	0.29	0.618499	0.0285131	0.14539	Q54XK2	99	Q54XK2	76.7	Q54XK2	22.2
Q54Y30	0.458	0.224	0.488	0.0388943	0.00273292	0.145921	Q54Y30	100	Q54Y30	45.8	Q54Y30	22.4
Q54YN3	0.658	0.224	0.34	0.266987	0.0124401	0.149168	Q54YN3	102.5	Q54YN3	67.4	Q54YN3	22.9
Q55GP7	1.096	0.224	0.204	0.967071	0.00096585	0.0111563	Q55GP7	99.4	Q55GP7	108.9	Q55GP7	22.2
Q75JT4	0.803	0.224	0.279	0.596497	0.00518548	0.0538429	Q75JT4	94.4	Q75JT4	75.8	Q75JT4	21.1
Q54D90	0.326	0.223	0.683	0.00019958	4.3353e-05	0.032063	Q54D90	100	Q54D90	32.6	Q54D90	22.3
Q54N59	0.471	0.223	0.474	0.051572	0.00349377	0.152407	Q54N59	100	Q54N59	47.1	Q54N59	22.3
Q54NQ7	0.515	0.223	0.433	0.0413545	0.00119112	0.0648951	Q54NQ7	98.3	Q54NQ7	50.7	Q54NQ7	22
Q54SN3	0.544	0.223	0.411	0.0763272	0.00180662	0.0692076	Q54SN3	100	Q54SN3	54.4	Q54SN3	22.3
Q54SQ0	0.701	0.223	0.318	0.416568	0.0346739	0.241654	Q54SQ0	100	Q54SQ0	70.1	Q54SQ0	22.3
Q75JI6	1.014	0.223	0.22	0.969289	0.00237502	0.0235027	Q75JI6	98.1	Q75JI6	99.5	Q75JI6	21.9
Q54FA1	0.424	0.222	0.524	0.00424224	0.00027904	0.0484735	Q54FA1	100.9	Q54FA1	42.8	Q54FA1	22.4
Q54N74	0.757	0.222	0.293	0.516634	0.0137157	0.103694	Q54N74	100	Q54N74	75.7	Q54N74	22.2
Q54RT4	0.89	0.222	0.25	0.888317	0.00547967	0.0417221	Q54RT4	102.1	Q54RT4	90.8	Q54RT4	22.7
Q55FU9	0.7	0.222	0.317	0.0519826	0.00017046	0.0081726	Q55FU9	95	Q55FU9	66.5	Q55FU9	21.1
Q869Q9	0.876	0.222	0.254	0.636672	0.0111921	0.0805371	Q869Q9	92.4	Q869Q9	81	Q869Q9	20.6
Q86LA2	0.776	0.222	0.286	0.551441	0.0103191	0.0844324	Q86LA2	100	Q86LA2	77.6	Q86LA2	22.2
Q54H98	0.249	0.221	0.888	0.00019895	5.0649e-05	0.14735	Q54H98	108.9	Q54H98	27.1	Q54H98	24.1
Q54ID8	0.53	0.221	0.417	0.0421815	0.00047907	0.0254715	Q54ID8	95.2	Q54ID8	50.5	Q54ID8	21.1
Q54TN9	0.698	0.221	0.317	0.149475	0.00061676	0.0209585	Q54TN9	100	Q54TN9	69.8	Q54TN9	22.1
Q55FV9	0.636	0.221	0.347	0.340947	0.0180133	0.166892	Q55FV9	92.4	Q55FV9	58.8	Q55FV9	20.4
Q869T6	0.33	0.221	0.668	0.00340811	0.0004254	0.115504	Q869T6	99.7	Q869T6	32.9	Q869T6	22
Q869W8	0.374	0.221	0.59	0.00186456	0.00017187	0.0437059	Q869W8	96.5	Q869W8	36.1	Q869W8	21.3
Q54PF1	0.789	0.22	0.279	0.504528	0.0149609	0.110345	Q54PF1	100	Q54PF1	78.9	Q54PF1	22
Q54QH1	1.321	0.22	0.166	0.89348	0.00610908	0.0274112	Q54QH1	110.3	Q54QH1	145.7	Q54QH1	24.3
Q54QP7	0.917	0.22	0.24	0.919468	0.00265002	0.0265671	Q54QP7	100	Q54QP7	91.7	Q54QP7	22
Q54RJ3	0.561	0.22	0.392	0.103649	0.00113199	0.0398132	Q54RJ3	100	Q54RJ3	56.1	Q54RJ3	22
Q55AI8	0.657	0.22	0.335	0.238635	0.00421488	0.0752198	Q55AI8	100	Q55AI8	65.7	Q55AI8	22
Q54CD8	0.362	0.219	0.605	0.0373772	0.00456737	0.271706	Q54CD8	100	Q54CD8	36.2	Q54CD8	21.9
Q54YU8	0.366	0.219	0.598	0.0254648	0.00221566	0.163643	Q54YU8	100	Q54YU8	36.6	Q54YU8	21.9
Q55CT3	0.848	0.219	0.258	0.570061	0.0206773	0.125067	Q55CT3	100	Q55CT3	84.8	Q55CT3	21.9
Q95US4	0.881	0.219	0.249	0.861701	0.00380208	0.0343539	Q95US4	100	Q95US4	88.1	Q95US4	21.9
Q54GG3	0.585	0.218	0.373	0.0626444	0.00097624	0.043755	Q54GG3	100	Q54GG3	58.5	Q54GG3	21.8
Q54KZ8	0.767	0.218	0.284	0.557986	0.0146724	0.102895	Q54KZ8	100	Q54KZ8	76.7	Q54KZ8	21.8
Q54RC3	0.401	0.218	0.542	0.105146	0.00700978	0.176259	Q54RC3	97	Q54RC3	38.9	Q54RC3	21.1
Q54XJ6	0.806	0.218	0.271	0.627287	0.00285877	0.0355891	Q54XJ6	102.1	Q54XJ6	82.3	Q54XJ6	22.3
Q55BA8	0.787	0.218	0.278	0.549502	0.0239319	0.142737	Q55BA8	98.9	Q55BA8	77.8	Q55BA8	21.6
Q54CD6	0.36	0.217	0.604	0.0325285	0.00497736	0.348791	Q54CD6	100	Q54CD6	36	Q54CD6	21.7
Q54HU9	0.42	0.217	0.515	0.0219687	0.00145166	0.112883	Q54HU9	100	Q54HU9	42	Q54HU9	21.7
Q54JU2	0.494	0.217	0.44	0.0280864	0.00075431	0.0503777	Q54JU2	101.8	Q54JU2	50.2	Q54JU2	22.1
Q54WD3	0.594	0.217	0.365	0.0779794	0.00197265	0.0735862	Q54WD3	98.4	Q54WD3	58.5	Q54WD3	21.4
Q54YP8	0.736	0.217	0.294	0.215314	0.00322202	0.0658638	Q54YP8	101.5	Q54YP8	74.7	Q54YP8	22
Q55EM4	0.53	0.217	0.41	0.189575	0.0135483	0.206808	Q55EM4	101.3	Q55EM4	53.6	Q55EM4	22
Q8MMS1	0.518	0.217	0.419	0.0436769	0.00076228	0.0402346	Q8MMS1	100	Q8MMS1	51.8	Q8MMS1	21.7
Q1ZXJ3	0.788	0.216	0.274	0.566617	0.0264841	0.148811	Q1ZXJ3	100	Q1ZXJ3	78.8	Q1ZXJ3	21.6
Q54G37	0.36	0.216	0.598	0.00945305	0.00076162	0.102403	Q54G37	104.6	Q54G37	37.7	Q54G37	22.6
Q54N54	0.574	0.216	0.377	0.0843801	0.00250878	0.085013	Q54N54	100.8	Q54N54	57.8	Q54N54	21.8
Q54S87	0.754	0.216	0.286	0.407684	0.00657254	0.0758644	Q54S87	91.5	Q54S87	69	Q54S87	19.7
Q54TW5	0.621	0.216	0.348	0.302835	0.00511572	0.0756699	Q54TW5	100	Q54TW5	62.1	Q54TW5	21.6
Q55C97	0.345	0.216	0.625	0.0594742	0.00626248	0.251617	Q55C97	100	Q55C97	34.5	Q55C97	21.6
Q55DN6	0.463	0.216	0.467	0.0344629	0.00130474	0.0772136	Q55DN6	99.6	Q55DN6	46.1	Q55DN6	21.5
Q55G49	0.697	0.216	0.309	0.328081	0.0155739	0.153498	Q55G49	100	Q55G49	69.7	Q55G49	21.6
Q55GP6	0.37	0.216	0.585	0.0369538	0.00315382	0.177123	Q55GP6	100	Q55GP6	37	Q55GP6	21.6
Q869Z0	0.759	0.216	0.285	0.499238	0.041656	0.237395	Q869Z0	99.1	Q869Z0	75.2	Q869Z0	21.4
Q54DH6	0.437	0.215	0.492	0.0162852	0.00096699	0.0904698	Q54DH6	104.3	Q54DH6	45.6	Q54DH6	22.4
Q54EM3	0.331	0.215	0.649	0.0263054	0.00390478	0.32322	Q54EM3	100	Q54EM3	33.1	Q54EM3	21.5
Q54IP3	0.664	0.215	0.324	0.152584	0.00107942	0.0326031	Q54IP3	100	Q54IP3	66.4	Q54IP3	21.5
Q54ME7	0.66	0.215	0.325	0.365244	0.0225027	0.187835	Q54ME7	97	Q54ME7	64	Q54ME7	20.8
Q54NL0	0.623	0.215	0.346	0.172036	0.00171289	0.0458316	Q54NL0	100	Q54NL0	62.3	Q54NL0	21.5
Q54P37	0.6	0.215	0.358	0.276213	0.0217798	0.232388	Q54P37	100	Q54P37	60	Q54P37	21.5
Q54Q29	0.969	0.215	0.222	0.977704	0.00748272	0.0337793	Q54Q29	100	Q54Q29	96.9	Q54Q29	21.5
Q55CP4	0.266	0.215	0.808	0.00063895	0.00013793	0.131342	Q55CP4	100.3	Q55CP4	26.7	Q55CP4	21.6
Q54GN0	0.786	0.214	0.272	0.643374	0.00287227	0.0350699	Q54GN0	100	Q54GN0	78.6	Q54GN0	21.4
Q54HG9	0.91	0.214	0.235	0.698325	0.0227469	0.111979	Q54HG9	100	Q54HG9	91	Q54HG9	21.4
Q54MP3	0.581	0.214	0.368	0.0606747	0.00097031	0.0441016	Q54MP3	100	Q54MP3	58.1	Q54MP3	21.4
Q54R41	0.89	0.214	0.241	0.817704	0.00459439	0.0403632	Q54R41	101.6	Q54R41	90.4	Q54R41	21.8
Q54VI6	0.774	0.214	0.276	0.543822	0.0283983	0.16229	Q54VI6	97.9	Q54VI6	75.7	Q54VI6	20.9
Q54YU5	0.506	0.214	0.423	0.0523983	0.00151935	0.0719595	Q54YU5	102.2	Q54YU5	51.8	Q54YU5	21.9
Q55ET3	0.686	0.214	0.312	0.144197	0.00037331	0.0128044	Q55ET3	99	Q55ET3	67.9	Q55ET3	21.2
Q769F9	0.69	0.214	0.31	0.302588	0.0113588	0.127927	Q769F9	99	Q769F9	68.3	Q769F9	21.2
Q7KWW0	0.742	0.214	0.288	0.283765	0.00396299	0.0665759	Q7KWW0	100	Q7KWW0	74.2	Q7KWW0	21.4
Q9NA13	0.518	0.214	0.413	0.0154132	0.00032488	0.0255867	Q9NA13	97.1	Q9NA13	50.3	Q9NA13	20.8
Q9NKX1	0.591	0.214	0.362	0.28785	0.0327292	0.324192	Q9NKX1	100	Q9NKX1	59	Q9NKX1	21.4
Q54CR2	0.428	0.213	0.498	0.00473183	0.00033988	0.0594958	Q54CR2	95	Q54CR2	40.7	Q54CR2	20.3
Q54DW2	0.701	0.213	0.304	0.392181	0.0155352	0.134486	Q54DW2	100	Q54DW2	70.1	Q54DW2	21.3
Q54IP7	0.356	0.213	0.6	0.0283922	0.00231053	0.156026	Q54IP7	100	Q54IP7	35.6	Q54IP7	21.3
Q54PQ9	0.627	0.213	0.34	0.161963	0.00084011	0.0259024	Q54PQ9	92	Q54PQ9	57.7	Q54PQ9	19.6
Q54RT5	0.379	0.213	0.562	0.00400355	0.00035175	0.0735545	Q54RT5	103.8	Q54RT5	39.4	Q54RT5	22.1
Q54TU1	0.616	0.213	0.346	0.233135	0.01336	0.174067	Q54TU1	96.8	Q54TU1	59.7	Q54TU1	20.7
Q552B8	0.795	0.213	0.267	0.505315	0.0188309	0.128543	Q552B8	100.3	Q552B8	79.8	Q552B8	21.3
Q55BH9	0.646	0.213	0.33	0.241336	0.00552631	0.0893908	Q55BH9	98.4	Q55BH9	63.6	Q55BH9	20.9
Q55BV1	0.516	0.213	0.412	0.0407015	0.00110497	0.0605575	Q55BV1	100	Q55BV1	51.6	Q55BV1	21.3
Q55ET6	0.732	0.213	0.291	0.413184	0.0195245	0.153498	Q55ET6	95.9	Q55ET6	70.3	Q55ET6	20.5
Q55GN0	0.493	0.213	0.433	0.060592	0.00225236	0.0921768	Q55GN0	98.4	Q55GN0	48.5	Q55GN0	21
Q86I95	0.672	0.213	0.317	0.149762	0.00035411	0.0121615	Q86I95	100	Q86I95	67.2	Q86I95	21.3
Q54CD7	0.712	0.212	0.298	0.416568	0.0148737	0.125409	Q54CD7	99.6	Q54CD7	70.9	Q54CD7	21.1
Q54GM0	0.265	0.212	0.797	0.0319533	0.00274384	0.17178	Q54GM0	119.2	Q54GM0	31.6	Q54GM0	25.2
Q54IC2	0.682	0.212	0.31	0.418206	0.0143426	0.121947	Q54IC2	96.6	Q54IC2	65.9	Q54IC2	20.4
Q54IF3	0.372	0.212	0.569	0.00530879	0.00060769	0.127186	Q54IF3	100	Q54IF3	37.2	Q54IF3	21.2
Q54MS0	0.39	0.212	0.543	0.00464173	0.0003485	0.0629972	Q54MS0	100	Q54MS0	39	Q54MS0	21.2
Q54XX6	0.959	0.212	0.221	0.98195	0.0018166	0.0196718	Q54XX6	105.7	Q54XX6	101.4	Q54XX6	22.4
Q55FH2	0.715	0.212	0.296	0.306845	0.00724962	0.0937859	Q55FH2	100	Q55FH2	71.5	Q55FH2	21.2
Q55FR8	0.692	0.212	0.306	0.286913	0.00936145	0.114738	Q55FR8	102.1	Q55FR8	70.7	Q55FR8	21.6
C7G057	0.567	0.211	0.372	0.0684477	0.00068297	0.0298075	C7G057	100	C7G057	56.7	C7G057	21.1
Q54I50	0.847	0.211	0.249	0.590232	0.0271226	0.146162	Q54I50	101.6	Q54I50	86	Q54I50	21.4
Q54LC0	4.304	0.211	0.049	0.016759	0.00643509	0.00773531	Q54LC0	99.1	Q54LC0	426.4	Q54LC0	20.9
Q54PL2	0.396	0.211	0.533	0.00126153	0.00011423	0.0295066	Q54PL2	100	Q54PL2	39.6	Q54PL2	21.1
Q54Q18	0.325	0.211	0.648	0.0749542	0.00618273	0.202713	Q54Q18	97.2	Q54Q18	31.6	Q54Q18	20.5
Q54VM5	0.424	0.211	0.498	0.0211474	0.00082777	0.0654127	Q54VM5	95.9	Q54VM5	40.6	Q54VM5	20.2
Q54XJ9	0.614	0.211	0.344	0.00859706	9.3331e-05	0.00736768	Q54XJ9	99.4	Q54XJ9	61.1	Q54XJ9	21
Q55E20	0.426	0.211	0.495	0.00067883	4.9272e-05	0.00835868	Q55E20	100	Q55E20	42.6	Q55E20	21.1
Q769F6	0.799	0.211	0.264	0.595052	0.0336689	0.169306	Q769F6	100	Q769F6	79.9	Q769F6	21.1
Q86A08	0.594	0.211	0.356	0.178033	0.00100438	0.0290651	Q86A08	99.5	Q86A08	59.1	Q86A08	21
Q86K95	0.368	0.211	0.574	0.0289075	0.00355364	0.259466	Q86K95	98.9	Q86K95	36.4	Q86K95	20.9
Q54G55	0.8	0.21	0.262	0.565249	0.0173165	0.111493	Q54G55	87.2	Q54G55	69.8	Q54G55	18.3
Q54II1	0.51	0.21	0.413	0.0621102	0.0017206	0.0734646	Q54II1	100	Q54II1	51	Q54II1	21
Q54Q97	0.615	0.21	0.341	0.25112	0.013183	0.16308	Q54Q97	106.2	Q54Q97	65.3	Q54Q97	22.3
Q55D57	0.562	0.21	0.374	0.18662	0.00619671	0.109454	Q55D57	93.6	Q55D57	52.7	Q55D57	19.7
Q869L7	0.507	0.21	0.414	0.0921434	0.00176748	0.0620655	Q869L7	92.8	Q869L7	47.1	Q869L7	19.5
Q86I62	0.801	0.21	0.262	0.508279	0.0142524	0.107004	Q86I62	97.4	Q86I62	78.1	Q86I62	20.5
Q86IL9	0.719	0.21	0.292	0.285012	0.00081486	0.0211518	Q86IL9	100	Q86IL9	71.9	Q86IL9	21
Q8T683	0.772	0.21	0.271	0.618291	0.00308879	0.0377652	Q8T683	99.9	Q8T683	77.2	Q8T683	20.9
P0CD61	0.691	0.209	0.302	0.448769	0.00821598	0.0829169	P0CD61	95.8	P0CD61	66.2	P0CD61	20
P18161	0.409	0.209	0.51	0.00897869	0.00050935	0.0645129	P18161	95.5	P18161	39.1	P18161	19.9
Q1ZXN2	0.358	0.209	0.583	0.0130202	0.00125331	0.147906	Q1ZXN2	100	Q1ZXN2	35.8	Q1ZXN2	20.9
Q54HE1	0.827	0.209	0.253	0.636602	0.0192841	0.109454	Q54HE1	100.6	Q54HE1	83.3	Q54HE1	21.1
Q54IT4	0.641	0.209	0.326	0.190379	0.00426902	0.0843534	Q54IT4	101.6	Q54IT4	65.1	Q54IT4	21.2
Q54MK9	0.364	0.209	0.576	0.021044	0.00127896	0.102761	Q54MK9	100.7	Q54MK9	36.6	Q54MK9	21.1
Q54N33	0.858	0.209	0.243	0.618613	0.0174178	0.105864	Q54N33	98.8	Q54N33	84.8	Q54N33	20.6
Q54N46	0.527	0.209	0.397	0.021091	0.00051288	0.0375729	Q54N46	102.8	Q54N46	54.2	Q54N46	21.5
Q54NA9	0.35	0.209	0.596	0.00081786	9.3865e-05	0.0323558	Q54NA9	99.2	Q54NA9	34.8	Q54NA9	20.7
Q54NS0	0.709	0.209	0.295	0.36576	0.0159896	0.144967	Q54NS0	98.4	Q54NS0	69.8	Q54NS0	20.6
Q54XJ8	0.438	0.209	0.477	0.0188559	0.00098178	0.0835838	Q54XJ8	100	Q54XJ8	43.8	Q54XJ8	20.9
Q54ZJ9	0.774	0.209	0.271	0.577652	0.00266829	0.0355891	Q54ZJ9	100.6	Q54ZJ9	77.9	Q54ZJ9	21.1
Q551S2	0.524	0.209	0.399	0.0799463	0.00328379	0.107621	Q551S2	99.9	Q551S2	52.3	Q551S2	20.9
Q556Y0	0.613	0.209	0.341	0.191154	0.00831378	0.135353	Q556Y0	100	Q556Y0	61.3	Q556Y0	20.9
Q55E32	0.839	0.209	0.25	0.587944	0.0102714	0.0807419	Q55E32	98.6	Q55E32	82.7	Q55E32	20.7
Q86IG3	0.345	0.209	0.605	0.0177047	0.00255273	0.287028	Q86IG3	96.9	Q86IG3	33.4	Q86IG3	20.2
Q95ZG8	0.695	0.209	0.301	0.25981	0.0010172	0.0254965	Q95ZG8	99.2	Q95ZG8	68.9	Q95ZG8	20.8
Q9GTN7	0.722	0.209	0.289	0.325681	0.00110922	0.0250884	Q9GTN7	100.9	Q9GTN7	72.9	Q9GTN7	21.1
B0G126	0.297	0.208	0.698	0.00057478	0.00013108	0.140793	B0G126	97.4	B0G126	29	B0G126	20.2
C7G025	1.009	0.208	0.206	0.9682	0.00313082	0.0273029	C7G025	95	C7G025	95.8	C7G025	19.7
Q54EQ3	0.597	0.208	0.348	0.12805	0.00191787	0.056792	Q54EQ3	92.8	Q54EQ3	55.4	Q54EQ3	19.3
Q54H71	0.368	0.208	0.565	0.00142436	0.00012971	0.0324735	Q54H71	100	Q54H71	36.8	Q54H71	20.8
Q54HX1	0.494	0.208	0.422	0.0376971	0.00108053	0.0618193	Q54HX1	100	Q54HX1	49.4	Q54HX1	20.8
Q54J42	0.661	0.208	0.314	0.282583	0.0103311	0.124946	Q54J42	100	Q54J42	66.1	Q54J42	20.8
Q54K69	0.54	0.208	0.385	0.0134161	0.00027215	0.0225323	Q54K69	103.8	Q54K69	56.1	Q54K69	21.6
Q54LW4	0.472	0.208	0.44	0.0254648	0.00057664	0.0389603	Q54LW4	113.3	Q54LW4	53.5	Q54LW4	23.5
Q54QZ6	0.43	0.208	0.483	0.0103436	0.00053088	0.0619166	Q54QZ6	100	Q54QZ6	43	Q54QZ6	20.8
Q54U18	0.813	0.208	0.255	0.591488	0.00139481	0.0235027	Q54U18	96.7	Q54U18	78.6	Q54U18	20.1
Q54U38	0.593	0.208	0.351	0.36509	0.0110061	0.110869	Q54U38	100	Q54U38	59.3	Q54U38	20.8
Q55BY2	0.636	0.208	0.327	0.137771	0.00083171	0.0273029	Q55BY2	97.8	Q55BY2	62.2	Q55BY2	20.4
Q55FV0	0.618	0.208	0.337	0.16869	0.00122226	0.0345073	Q55FV0	100	Q55FV0	61.8	Q55FV0	20.8
Q75JY0	0.61	0.208	0.341	0.0779104	0.00112206	0.0451867	Q75JY0	91.7	Q75JY0	56	Q75JY0	19.1
Q869T2	0.362	0.208	0.575	0.0484396	0.00294352	0.133555	Q869T2	100	Q869T2	36.2	Q869T2	20.8
Q86AH6	0.382	0.208	0.544	0.00737696	0.00068416	0.10886	Q86AH6	100	Q86AH6	38.2	Q86AH6	20.8
Q86HL5	0.471	0.208	0.442	0.0295432	0.00098477	0.0644431	Q86HL5	99.5	Q86HL5	46.9	Q86HL5	20.7
Q9NGW9	0.413	0.208	0.504	0.0807501	0.00751573	0.233591	Q9NGW9	100	Q9NGW9	41.3	Q9NGW9	20.8
B0G197	0.452	0.207	0.459	0.0255045	0.00103323	0.0735862	B0G197	101.8	B0G197	46	B0G197	21.1
P34142	0.482	0.207	0.431	0.00870306	0.00026907	0.0273029	P34142	101	P34142	48.6	P34142	20.9
Q1ZXA8	0.642	0.207	0.323	0.042856	0.00013525	0.00736768	Q1ZXA8	99.6	Q1ZXA8	63.9	Q1ZXA8	20.6
Q54CN5	0.277	0.207	0.749	0.00192362	0.00049894	0.458731	Q54CN5	101.7	Q54CN5	28.2	Q54CN5	21.1
Q54IC1	0.735	0.207	0.282	0.442066	0.0130633	0.11014	Q54IC1	100	Q54IC1	73.5	Q54IC1	20.7
Q54JK0	0.358	0.207	0.58	0.0118509	0.00133366	0.17817	Q54JK0	99.8	Q54JK0	35.7	Q54JK0	20.7
Q54R04	0.643	0.207	0.322	0.0424242	0.00018169	0.008653	Q54R04	100	Q54R04	64.3	Q54R04	20.7
Q86L17	0.853	0.207	0.242	0.739173	0.00213598	0.0273029	Q86L17	103.2	Q86L17	88	Q86L17	21.3
P54642	1.306	0.206	0.158	0.889777	0.00162644	0.0138744	P54642	100	P54642	130.6	P54642	20.6
Q54BP1	0.544	0.206	0.379	0.0613089	0.00054516	0.0250955	Q54BP1	99.5	Q54BP1	54.1	Q54BP1	20.5
Q54CC5	0.717	0.206	0.288	0.450146	0.00821598	0.0827706	Q54CC5	96.5	Q54CC5	69.2	Q54CC5	19.9
Q54E62	0.926	0.206	0.222	0.716529	0.0247861	0.11571	Q54E62	100	Q54E62	92.6	Q54E62	20.6
Q54LU8	0.321	0.206	0.643	0.0247322	0.00247459	0.191061	Q54LU8	121.4	Q54LU8	38.9	Q54LU8	25
Q54TZ6	0.534	0.206	0.385	0.0964636	0.00233383	0.0754787	Q54TZ6	101.2	Q54TZ6	54.1	Q54TZ6	20.8
Q54XP6	0.821	0.206	0.25	0.762953	0.00648113	0.0526354	Q54XP6	102.1	Q54XP6	83.8	Q54XP6	21
Q55B58	0.435	0.206	0.472	0.0254753	0.00143138	0.101566	Q55B58	103.9	Q55B58	45.2	Q55B58	21.4
Q95ZG3	0.58	0.206	0.356	0.0680695	0.00038077	0.0168259	Q95ZG3	99.7	Q95ZG3	57.8	Q95ZG3	20.6
P34115	1.097	0.205	0.187	0.949143	0.00185179	0.0158736	P34115	100.2	P34115	109.9	P34115	20.6
Q54D61	0.421	0.205	0.487	0.00466397	0.00028312	0.0456245	Q54D61	100	Q54D61	42.1	Q54D61	20.5
Q54J57	0.628	0.205	0.327	0.104627	0.0057086	0.146798	Q54J57	100	Q54J57	62.8	Q54J57	20.5
Q54JQ6	0.655	0.205	0.313	0.315381	0.0148763	0.152627	Q54JQ6	93.1	Q54JQ6	61	Q54JQ6	19.1
Q54R45	0.746	0.205	0.274	0.454871	0.0218881	0.15511	Q54R45	98.6	Q54R45	73.5	Q54R45	20.2
Q54TK6	0.485	0.205	0.422	0.0157248	0.00030034	0.0233521	Q54TK6	100	Q54TK6	48.5	Q54TK6	20.5
Q553Y7	0.76	0.205	0.27	0.50779	0.00109488	0.0213313	Q553Y7	100	Q553Y7	76	Q553Y7	20.5
Q55A32	0.451	0.205	0.455	0.00415615	0.00015836	0.0195383	Q55A32	103.2	Q55A32	46.6	Q55A32	21.2
Q55FK2	0.494	0.205	0.415	0.0162998	0.00039803	0.032091	Q55FK2	100.7	Q55FK2	49.8	Q55FK2	20.6
Q55FP7	0.499	0.205	0.411	0.0482446	0.00141905	0.0707757	Q55FP7	100	Q55FP7	49.9	Q55FP7	20.5
Q75JQ3	0.573	0.205	0.357	0.0821589	0.00108106	0.0425452	Q75JQ3	99.3	Q75JQ3	56.9	Q75JQ3	20.3
Q54BI6	0.393	0.204	0.519	0.0726051	0.0102454	0.360283	Q54BI6	100	Q54BI6	39.3	Q54BI6	20.4
Q54P61	0.855	0.204	0.239	0.868277	0.00441015	0.0371706	Q54P61	100	Q54P61	85.5	Q54P61	20.4
Q54S23	0.703	0.204	0.29	0.348671	0.00111148	0.0246714	Q54S23	100	Q54S23	70.3	Q54S23	20.4
Q54WG3	0.31	0.204	0.66	0.00312994	0.00051007	0.187367	Q54WG3	101	Q54WG3	31.3	Q54WG3	20.6
Q559Z3	0.728	0.204	0.28	0.384921	0.00141415	0.0280204	Q559Z3	96.1	Q559Z3	69.9	Q559Z3	19.6
Q55EX3	0.355	0.204	0.576	0.00380236	0.00037255	0.0838392	Q55EX3	100	Q55EX3	35.5	Q55EX3	20.4
Q55FU1	0.575	0.204	0.355	0.200403	0.012718	0.186336	Q55FU1	100	Q55FU1	57.5	Q55FU1	20.4
Q6S002	0.336	0.204	0.607	0.00074093	8.9913e-05	0.0324611	Q6S002	103.5	Q6S002	34.8	Q6S002	21.1
Q86HQ9	0.369	0.204	0.551	0.0079702	0.00062536	0.0911848	Q86HQ9	100	Q86HQ9	36.9	Q86HQ9	20.4
P22684	0.418	0.203	0.487	0.0530277	0.00466287	0.201165	P22684	107.7	P22684	45	P22684	21.9
Q54D76	0.521	0.203	0.39	0.0552208	0.00082482	0.0390102	Q54D76	102.5	Q54D76	53.4	Q54D76	20.8
Q54FB1	0.716	0.203	0.283	0.381663	0.0124525	0.116916	Q54FB1	99.2	Q54FB1	71.1	Q54FB1	20.1
Q54GY6	0.508	0.203	0.4	0.0294804	0.00066768	0.0430099	Q54GY6	104.8	Q54GY6	53.2	Q54GY6	21.3
Q54HB0	0.564	0.203	0.359	0.0473456	0.00102213	0.0525959	Q54HB0	101	Q54HB0	57	Q54HB0	20.5
Q54LN2	0.586	0.203	0.346	0.0210777	0.00014649	0.00835868	Q54LN2	100	Q54LN2	58.6	Q54LN2	20.3
Q54WM4	0.635	0.203	0.319	0.311327	0.00773942	0.0971121	Q54WM4	97.3	Q54WM4	61.7	Q54WM4	19.7
Q55AW5	0.819	0.203	0.248	0.560934	0.00138276	0.0239313	Q55AW5	97.1	Q55AW5	79.6	Q55AW5	19.7
Q55F81	0.381	0.203	0.531	0.00905885	0.00083636	0.11959	Q55F81	95.8	Q55F81	36.5	Q55F81	19.4
Q55GF9	0.471	0.203	0.431	0.0352927	0.0011235	0.0667521	Q55GF9	100	Q55GF9	47.1	Q55GF9	20.3
Q6RZZ9	0.364	0.203	0.557	0.0181566	0.00158365	0.14741	Q6RZZ9	99.7	Q6RZZ9	36.3	Q6RZZ9	20.2
Q86AF0	0.742	0.203	0.274	0.539306	0.00208517	0.0318812	Q86AF0	97	Q86AF0	71.9	Q86AF0	19.7
Q86KS1	0.53	0.203	0.384	0.0120946	0.0002877	0.0250884	Q86KS1	100	Q86KS1	53	Q86KS1	20.3
Q8T154	0.481	0.203	0.423	0.0531922	0.00216161	0.0962595	Q8T154	100	Q8T154	48.1	Q8T154	20.3
Q23862	0.642	0.202	0.314	0.205593	0.00079573	0.0231799	Q23862	96.1	Q23862	61.7	Q23862	19.4
Q54CH1	0.956	0.202	0.212	0.667926	0.00194407	0.0273029	Q54CH1	100	Q54CH1	95.6	Q54CH1	20.2
Q54Q53	0.598	0.202	0.338	0.154795	0.00610032	0.1208	Q54Q53	100.2	Q54Q53	59.9	Q54Q53	20.3
Q54R42	0.474	0.202	0.427	0.0631756	0.00251461	0.0990718	Q54R42	100	Q54R42	47.4	Q54R42	20.2
Q54TD8	0.325	0.202	0.623	0.0350728	0.00461698	0.294207	Q54TD8	99.5	Q54TD8	32.3	Q54TD8	20.1
Q54U20	0.668	0.202	0.303	0.28908	0.016051	0.17244	Q54U20	105.3	Q54U20	70.4	Q54U20	21.3
Q54Z90	0.343	0.202	0.591	0.0123229	0.00164534	0.233558	Q54Z90	100	Q54Z90	34.3	Q54Z90	20.2
Q550W1	0.713	0.202	0.283	0.382182	0.0131485	0.121854	Q550W1	90.9	Q550W1	64.8	Q550W1	18.4
Q55AX3	0.854	0.202	0.236	0.602079	0.00444659	0.0488775	Q55AX3	83.2	Q55AX3	71.1	Q55AX3	16.8
Q55E18	0.614	0.202	0.329	0.244119	0.0123538	0.157925	Q55E18	100	Q55E18	61.4	Q55E18	20.2
Q86A74	0.436	0.202	0.463	0.0259967	0.00121107	0.0848975	Q86A74	98.6	Q86A74	43	Q86A74	19.9
Q86H65	0.723	0.202	0.279	0.419244	0.0216709	0.164	Q86H65	97.8	Q86H65	70.8	Q86H65	19.7
Q54CW5	0.413	0.201	0.488	0.00573577	0.00027453	0.0363116	Q54CW5	102.1	Q54CW5	42.1	Q54CW5	20.6
Q54DP5	0.478	0.201	0.42	0.0655332	0.00115349	0.0503777	Q54DP5	93	Q54DP5	44.4	Q54DP5	18.7
Q54E47	0.497	0.201	0.405	0.161303	0.0028382	0.0689305	Q54E47	113.6	Q54E47	56.4	Q54E47	22.9
Q54LX7	0.696	0.201	0.289	0.281654	0.00112619	0.0267252	Q54LX7	99.6	Q54LX7	69.3	Q54LX7	20
Q54NL4	0.741	0.201	0.271	0.50115	0.0152857	0.111979	Q54NL4	99.5	Q54NL4	73.7	Q54NL4	19.9
Q54SY9	0.336	0.201	0.598	0.0118168	0.00088174	0.103293	Q54SY9	100	Q54SY9	33.6	Q54SY9	20.1
Q54WC9	0.5	0.201	0.401	0.0145388	0.00036954	0.0313712	Q54WC9	100	Q54WC9	50	Q54WC9	20.1
Q556T4	0.64	0.201	0.315	0.356165	0.0276048	0.228725	Q556T4	100.5	Q556T4	64.3	Q556T4	20.2
Q55DT6	0.445	0.201	0.451	0.0717305	0.00351513	0.121918	Q55DT6	100	Q55DT6	44.5	Q55DT6	20.1
Q55DX6	0.669	0.201	0.3	0.305499	0.00757939	0.0968783	Q55DX6	103.2	Q55DX6	69	Q55DX6	20.7
Q86K74	0.38	0.201	0.529	0.00105139	9.5321e-05	0.0249493	Q86K74	100	Q86K74	38	Q86K74	20.1
Q8T191	0.653	0.201	0.307	0.293725	0.0139573	0.15289	Q8T191	98.9	Q8T191	64.6	Q8T191	19.9
P34046	0.768	0.2	0.261	0.534354	0.00129757	0.0233696	P34046	100	P34046	76.8	P34046	20
Q54C27	0.807	0.2	0.248	0.502771	0.01552	0.113106	Q54C27	100.3	Q54C27	80.9	Q54C27	20.1
Q54G01	0.524	0.2	0.383	0.0811678	0.00072053	0.0292704	Q54G01	100	Q54G01	52.4	Q54G01	20
Q54IE9	0.367	0.2	0.547	0.0406821	0.011442	0.664277	Q54IE9	100	Q54IE9	36.7	Q54IE9	20
Q54IL3	0.527	0.2	0.379	0.041543	0.00086294	0.0475934	Q54IL3	100	Q54IL3	52.7	Q54IL3	20
Q54KR6	0.643	0.2	0.312	0.273941	0.00828625	0.108553	Q54KR6	100	Q54KR6	64.3	Q54KR6	20
Q54NN4	0.419	0.2	0.477	0.0369809	0.00164865	0.09242	Q54NN4	101.3	Q54NN4	42.5	Q54NN4	20.3
Q54NS7	0.65	0.2	0.308	0.329296	0.0194896	0.181713	Q54NS7	95.5	Q54NS7	62.1	Q54NS7	19.1
Q54PE0	0.337	0.2	0.593	0.0214397	0.00318997	0.311209	Q54PE0	98.5	Q54PE0	33.2	Q54PE0	19.7
Q54ZW6	0.77	0.2	0.259	0.328708	0.00038609	0.0106993	Q54ZW6	101.4	Q54ZW6	78.1	Q54ZW6	20.3
Q556M3	0.417	0.2	0.479	0.00576329	0.00023681	0.0286187	Q556M3	103	Q556M3	43	Q556M3	20.6
Q55AM9	0.761	0.2	0.263	0.426866	0.0160633	0.129903	Q55AM9	100.9	Q55AM9	76.8	Q55AM9	20.2
Q55BU9	0.553	0.2	0.361	0.104824	0.00389736	0.106607	Q55BU9	101.9	Q55BU9	56.3	Q55BU9	20.3
Q55CD0	0.735	0.2	0.273	0.421251	0.00095976	0.0207592	Q55CD0	99.7	Q55CD0	73.3	Q55CD0	20
Q55E35	0.804	0.2	0.248	0.516634	0.0138372	0.104461	Q55E35	100	Q55E35	80.4	Q55E35	20
Q54BH3	0.305	0.199	0.654	0.0240374	0.00487196	0.466827	Q54BH3	99.7	Q54BH3	30.4	Q54BH3	19.9
Q54F65	0.58	0.199	0.343	0.206398	0.00990569	0.148456	Q54F65	100	Q54F65	58	Q54F65	19.9
Q54HY6	0.436	0.199	0.457	0.00740141	0.00030641	0.035961	Q54HY6	100	Q54HY6	43.6	Q54HY6	19.9
Q54RP8	0.488	0.199	0.407	0.011779	0.00035066	0.0327177	Q54RP8	100.4	Q54RP8	49.1	Q54RP8	20
Q555Q0	0.57	0.199	0.35	0.107882	0.00445393	0.115917	Q555Q0	100	Q555Q0	57	Q555Q0	19.9
Q556T9	0.506	0.199	0.393	0.120964	0.00586814	0.1365	Q556T9	99.1	Q556T9	50.2	Q556T9	19.8
Q558U1	0.618	0.199	0.322	0.164108	0.0027619	0.0669924	Q558U1	105.4	Q558U1	65.1	Q558U1	21
Q55BS2	0.644	0.199	0.309	0.255716	0.00226	0.0476082	Q55BS2	99.1	Q55BS2	63.8	Q55BS2	19.7
Q55FN8	0.654	0.199	0.305	0.294157	0.00957131	0.114738	Q55FN8	101.6	Q55FN8	66.5	Q55FN8	20.2
Q58A42	0.778	0.199	0.256	0.450286	0.00420984	0.0546553	Q58A42	98.1	Q58A42	76.4	Q58A42	19.6
Q86AX2	0.935	0.199	0.213	0.998107	0.00087618	0.0120047	Q86AX2	100	Q86AX2	93.5	Q86AX2	19.9
Q8ST87	0.383	0.199	0.521	0.00194251	0.00013475	0.025311	Q8ST87	100	Q8ST87	38.3	Q8ST87	19.9
Q54DV7	0.33	0.198	0.6	0.0361091	0.00406902	0.244604	Q54DV7	98.9	Q54DV7	32.7	Q54DV7	19.6
Q54IM3	0.33	0.198	0.599	0.019639	0.00259229	0.260616	Q54IM3	96.8	Q54IM3	32	Q54IM3	19.2
Q54IT8	0.636	0.198	0.311	0.216922	0.00883108	0.130892	Q54IT8	101.1	Q54IT8	64.3	Q54IT8	20
Q54JY1	0.466	0.198	0.426	0.0392864	0.00125096	0.0701244	Q54JY1	100	Q54JY1	46.6	Q54JY1	19.8
Q54LE2	0.486	0.198	0.408	0.0534104	0.00242706	0.105573	Q54LE2	100	Q54LE2	48.6	Q54LE2	19.8
Q54M68	0.493	0.198	0.401	0.0281392	0.00065087	0.0427701	Q54M68	97.1	Q54M68	47.8	Q54M68	19.2
Q54PL0	0.275	0.198	0.72	0.00321958	0.00065132	0.310166	Q54PL0	100	Q54PL0	27.5	Q54PL0	19.8
Q54QC4	0.403	0.198	0.492	0.00723533	0.00036381	0.0476519	Q54QC4	95.5	Q54QC4	38.5	Q54QC4	18.9
Q54T20	0.405	0.198	0.489	0.00466992	0.00031599	0.0540539	Q54T20	99.3	Q54T20	40.2	Q54T20	19.7
Q54UL9	0.689	0.198	0.288	0.340106	0.0133983	0.133252	Q54UL9	100	Q54UL9	68.9	Q54UL9	19.8
Q553M8	0.64	0.198	0.31	0.282231	0.0132814	0.151103	Q553M8	100	Q553M8	64	Q553M8	19.8
Q55FR0	0.766	0.198	0.259	0.569568	0.00322245	0.0408666	Q55FR0	102.3	Q55FR0	78.3	Q55FR0	20.3
P36412	0.743	0.197	0.266	0.254378	0.00041356	0.0120334	P36412	100	P36412	74.3	P36412	19.7
Q54CN8	0.451	0.197	0.437	0.0180109	0.00074481	0.0640085	Q54CN8	95.2	Q54CN8	43	Q54CN8	18.8
Q54CN9	0.659	0.197	0.3	0.430194	0.0145203	0.120382	Q54CN9	100	Q54CN9	65.9	Q54CN9	19.7
Q54DL5	0.578	0.197	0.341	0.265245	0.00164632	0.0361677	Q54DL5	105.2	Q54DL5	60.8	Q54DL5	20.7
Q54HU4	0.495	0.197	0.398	0.0945189	0.008001	0.218681	Q54HU4	95.5	Q54HU4	47.3	Q54HU4	18.8
Q54JR2	0.817	0.197	0.241	0.721811	0.00189548	0.0256995	Q54JR2	98.7	Q54JR2	80.6	Q54JR2	19.4
Q54KE2	0.849	0.197	0.232	0.831875	0.0008498	0.0138744	Q54KE2	100	Q54KE2	84.9	Q54KE2	19.7
Q54NY5	0.611	0.197	0.322	0.181691	0.00832359	0.140851	Q54NY5	100.8	Q54NY5	61.6	Q54NY5	19.9
Q54Y70	0.914	0.197	0.216	0.821059	0.00551499	0.0451867	Q54Y70	100	Q54Y70	91.4	Q54Y70	19.7
Q54ZM4	0.648	0.197	0.303	0.235154	0.00717023	0.107135	Q54ZM4	100	Q54ZM4	64.8	Q54ZM4	19.7
Q55DQ2	0.735	0.197	0.269	0.371459	0.0020612	0.0368898	Q55DQ2	100.4	Q55DQ2	73.8	Q55DQ2	19.8
Q55FR2	0.606	0.197	0.325	0.222599	0.0092133	0.133038	Q55FR2	94.4	Q55FR2	57.2	Q55FR2	18.6
Q54CJ5	0.417	0.196	0.47	0.00224451	0.0001458	0.0261115	Q54CJ5	106.9	Q54CJ5	44.6	Q54CJ5	20.9
Q54EC2	0.36	0.196	0.543	0.0220338	0.00181383	0.146042	Q54EC2	100	Q54EC2	36	Q54EC2	19.6
Q54EQ0	0.336	0.196	0.584	0.00757854	0.00096407	0.177535	Q54EQ0	99.3	Q54EQ0	33.4	Q54EQ0	19.5
Q54H94	0.466	0.196	0.42	0.0132689	0.00040106	0.035961	Q54H94	100	Q54H94	46.6	Q54H94	19.6
Q54MC0	0.648	0.196	0.302	0.247883	0.00495837	0.0817173	Q54MC0	100	Q54MC0	64.8	Q54MC0	19.6
Q54QW1	0.77	0.196	0.254	0.574683	0.0103599	0.0824287	Q54QW1	100	Q54QW1	77	Q54QW1	19.6
Q54W34	0.701	0.196	0.279	0.34704	0.0132795	0.130689	Q54W34	99.4	Q54W34	69.7	Q54W34	19.5
Q554G9	0.371	0.196	0.527	0.0017655	0.00013475	0.0277458	Q554G9	101.7	Q554G9	37.8	Q554G9	19.9
Q554H4	0.729	0.196	0.269	0.374699	0.00102213	0.022935	Q554H4	104.1	Q554H4	75.9	Q554H4	20.4
Q559A6	0.478	0.196	0.409	0.0855822	0.00498474	0.148858	Q559A6	96.9	Q559A6	46.3	Q559A6	19
Q55CW2	0.449	0.196	0.436	0.0337307	0.0018432	0.108181	Q55CW2	106.7	Q55CW2	48	Q55CW2	20.9
Q86J15	0.472	0.196	0.416	0.0352739	0.00106245	0.0629972	Q86J15	100.4	Q86J15	47.4	Q86J15	19.7
C7FZX8	0.324	0.195	0.602	0.00648927	0.00078231	0.152839	C7FZX8	103.6	C7FZX8	33.6	C7FZX8	20.2
C7FZZ4	0.564	0.195	0.346	0.0633465	0.00111988	0.0496245	C7FZZ4	102.5	C7FZZ4	57.8	C7FZZ4	20
Q54D59	0.305	0.195	0.638	0.0247453	0.00307122	0.252379	Q54D59	100	Q54D59	30.5	Q54D59	19.5
Q54IS9	0.633	0.195	0.308	0.351838	0.00300829	0.050163	Q54IS9	97.7	Q54IS9	61.8	Q54IS9	19.1
Q54IU0	0.433	0.195	0.45	0.03342	0.00136882	0.0827406	Q54IU0	100	Q54IU0	43.3	Q54IU0	19.5
Q54K07	0.456	0.195	0.428	0.0944564	0.00923724	0.254746	Q54K07	100	Q54K07	45.6	Q54K07	19.5
Q54KF7	0.785	0.195	0.248	0.69931	0.00156114	0.0233696	Q54KF7	100	Q54KF7	78.5	Q54KF7	19.5
Q54M17	0.409	0.195	0.477	0.0182179	0.00156933	0.14539	Q54M17	101.5	Q54M17	41.5	Q54M17	19.8
Q54NB6	0.311	0.195	0.625	0.0395707	0.0046028	0.260065	Q54NB6	100	Q54NB6	31.1	Q54NB6	19.5
Q54P87	0.285	0.195	0.684	0.00945978	0.00152754	0.292505	Q54P87	100	Q54P87	28.5	Q54P87	19.5
Q54RJ1	0.653	0.195	0.299	0.319097	0.00933794	0.107668	Q54RJ1	97	Q54RJ1	63.4	Q54RJ1	19
Q54TN1	0.718	0.195	0.272	0.190646	0.00095087	0.0271117	Q54TN1	100	Q54TN1	71.8	Q54TN1	19.5
Q54WF5	0.405	0.195	0.482	0.00998004	0.0005372	0.0640979	Q54WF5	100	Q54WF5	40.5	Q54WF5	19.5
Q55CF7	0.316	0.195	0.618	0.00642006	0.00079635	0.159683	Q55CF7	90.5	Q55CF7	28.6	Q55CF7	17.7
Q55EV9	0.353	0.195	0.554	0.00478187	0.00039184	0.0735545	Q55EV9	100.6	Q55EV9	35.5	Q55EV9	19.6
C7G032	0.277	0.194	0.701	0.010703	0.00246521	0.511857	C7G032	100	C7G032	27.7	C7G032	19.4
P16894	0.816	0.194	0.238	0.677657	0.00210981	0.0284318	P16894	98	P16894	79.9	P16894	19
P34042	0.805	0.194	0.241	0.633127	0.00116021	0.0200072	P34042	100.8	P34042	81.2	P34042	19.5
Q54BW3	0.608	0.194	0.319	0.227484	0.00948733	0.134034	Q54BW3	102.9	Q54BW3	62.5	Q54BW3	19.9
Q54CC0	0.246	0.194	0.787	0.00062853	0.00014342	0.156315	Q54CC0	103.9	Q54CC0	25.5	Q54CC0	20.1
Q54H97	0.26	0.194	0.747	0.00109035	0.00017046	0.0854202	Q54H97	103.3	Q54H97	26.9	Q54H97	20.1
Q54HJ2	0.304	0.194	0.638	0.0281846	0.00434078	0.342555	Q54HJ2	100	Q54HJ2	30.4	Q54HJ2	19.4
Q54LV2	0.528	0.194	0.367	0.14636	0.00778524	0.1537	Q54LV2	92.2	Q54LV2	48.7	Q54LV2	17.8
Q54NP0	0.804	0.194	0.241	0.477652	0.00225928	0.0349413	Q54NP0	94.8	Q54NP0	76.2	Q54NP0	18.4
Q54NP1	0.321	0.194	0.606	0.0115813	0.00182855	0.299907	Q54NP1	100	Q54NP1	32.1	Q54NP1	19.4
Q54P78	0.557	0.194	0.348	0.0985419	0.00230561	0.0742016	Q54P78	100	Q54P78	55.7	Q54P78	19.4
Q54VB9	0.475	0.194	0.409	0.124417	0.0128843	0.281159	Q54VB9	97.8	Q54VB9	46.4	Q54VB9	19
Q54XA0	0.779	0.194	0.249	0.363626	0.00127765	0.0267135	Q54XA0	95	Q54XA0	74.1	Q54XA0	18.5
Q54XZ5	0.375	0.194	0.518	0.0158012	0.00128144	0.127605	Q54XZ5	100	Q54XZ5	37.5	Q54XZ5	19.4
Q55BR9	0.375	0.194	0.516	0.0176484	0.00173135	0.169139	Q55BR9	97.5	Q55BR9	36.6	Q55BR9	18.9
Q55EH9	1.523	0.194	0.128	0.770315	0.00446699	0.0217868	Q55EH9	100	Q55EH9	152.3	Q55EH9	19.4
Q1ZXA6	0.336	0.193	0.573	0.0131015	0.00195777	0.281532	Q1ZXA6	100	Q1ZXA6	33.6	Q1ZXA6	19.3
Q54RB0	0.464	0.193	0.416	0.0387618	0.00129893	0.0730079	Q54RB0	100	Q54RB0	46.4	Q54RB0	19.3
Q54S31	0.429	0.193	0.449	0.0120424	0.00055169	0.0583016	Q54S31	102.7	Q54S31	44.1	Q54S31	19.8
Q54S75	0.306	0.193	0.629	0.00170952	0.00020127	0.0667145	Q54S75	91	Q54S75	27.9	Q54S75	17.5
Q54WY9	0.647	0.193	0.298	0.228573	0.00758596	0.112364	Q54WY9	98.3	Q54WY9	63.6	Q54WY9	18.9
Q54XT3	0.74	0.193	0.261	0.276896	0.00171939	0.0367652	Q54XT3	100.4	Q54XT3	74.3	Q54XT3	19.4
Q55EK2	0.649	0.193	0.298	0.259924	0.00764762	0.106046	Q55EK2	102.2	Q55EK2	66.3	Q55EK2	19.7
Q55FE2	0.648	0.193	0.298	0.247252	0.00570567	0.0900607	Q55FE2	94.2	Q55FE2	61.1	Q55FE2	18.2
Q55GH9	0.612	0.193	0.315	0.198718	0.00155153	0.0393893	Q55GH9	101.4	Q55GH9	62	Q55GH9	19.5
Q86I68	0.431	0.193	0.449	0.0642243	0.00261817	0.101252	Q86I68	96	Q86I68	41.3	Q86I68	18.6
Q86JE7	0.247	0.193	0.779	0.0059075	0.00208112	0.809334	Q86JE7	101.9	Q86JE7	25.2	Q86JE7	19.6
Q54BM0	0.469	0.192	0.408	0.051955	0.00157506	0.0744792	Q54BM0	97.1	Q54BM0	45.6	Q54BM0	18.6
Q54ED0	0.999	0.192	0.192	0.987719	0.00237987	0.0230167	Q54ED0	100	Q54ED0	99.9	Q54ED0	19.2
Q54GM7	0.683	0.192	0.281	0.253795	0.0011848	0.0289617	Q54GM7	100	Q54GM7	68.3	Q54GM7	19.2
Q54HN2	0.493	0.192	0.389	0.0626301	0.00348735	0.131672	Q54HN2	100	Q54HN2	49.3	Q54HN2	19.2
Q54I54	0.647	0.192	0.298	0.232667	0.00581004	0.0937078	Q54I54	96.4	Q54I54	62.3	Q54I54	18.6
Q54RQ1	1.011	0.192	0.19	0.995287	0.00272468	0.0239536	Q54RQ1	90.9	Q54RQ1	91.9	Q54RQ1	17.5
Q54SQ5	0.794	0.192	0.241	0.569568	0.00329949	0.0417056	Q54SQ5	101.7	Q54SQ5	80.8	Q54SQ5	19.5
Q55C65	0.372	0.192	0.516	0.00864759	0.0007555	0.108181	Q55C65	93.2	Q55C65	34.7	Q55C65	17.9
Q55EN6	0.587	0.192	0.326	0.0411923	0.00048325	0.0258987	Q55EN6	109.3	Q55EN6	64.2	Q55EN6	20.9
Q86KG4	0.37	0.192	0.519	0.0540489	0.00401155	0.168746	Q86KG4	87.7	Q86KG4	32.5	Q86KG4	16.9
P15064	0.575	0.191	0.333	0.0760265	0.00058669	0.0249762	P15064	100	P15064	57.5	P15064	19.1
Q54C49	0.642	0.191	0.297	0.317482	0.006647	0.0876512	Q54C49	98.7	Q54C49	63.4	Q54C49	18.8
Q54IV7	0.546	0.191	0.349	0.105355	0.00327567	0.0931019	Q54IV7	100	Q54IV7	54.6	Q54IV7	19.1
Q54JC0	0.344	0.191	0.555	0.00565976	0.00034807	0.0530103	Q54JC0	108.1	Q54JC0	37.2	Q54JC0	20.7
Q54MG1	0.332	0.191	0.574	0.0039841	0.00040463	0.0909182	Q54MG1	100	Q54MG1	33.2	Q54MG1	19.1
Q54S52	0.832	0.191	0.229	0.117666	3.9992e-05	0.00231782	Q54S52	100	Q54S52	83.2	Q54S52	19.1
Q54X28	0.282	0.191	0.676	0.0187294	0.00326967	0.378727	Q54X28	100	Q54X28	28.2	Q54X28	19.1
Q554U9	0.68	0.191	0.281	0.315539	0.00639731	0.0854202	Q554U9	100	Q554U9	68	Q554U9	19.1
Q556H0	0.402	0.191	0.476	0.0134388	0.00080618	0.08426	Q556H0	107.2	Q556H0	43.1	Q556H0	20.5
Q559Q5	0.744	0.191	0.256	0.399409	0.0120597	0.111185	Q559Q5	100	Q559Q5	74.4	Q559Q5	19.1
Q55CR0	0.682	0.191	0.279	0.339981	0.00969173	0.106947	Q55CR0	100	Q55CR0	68.2	Q55CR0	19.1
Q55DA0	0.904	0.191	0.212	0.88388	0.00198069	0.0234441	Q55DA0	99.1	Q55DA0	89.5	Q55DA0	18.9
Q55F59	0.503	0.191	0.379	0.0189333	0.00027592	0.0194188	Q55F59	98.1	Q55F59	49.4	Q55F59	18.7
Q75JP0	0.39	0.191	0.49	0.00573015	0.00032447	0.0477698	Q75JP0	100	Q75JP0	39	Q75JP0	19.1
Q869P0	0.274	0.191	0.697	0.0143731	0.00273665	0.407815	Q869P0	96.9	Q869P0	26.6	Q869P0	18.5
Q54F76	0.892	0.19	0.213	0.838287	0.00121691	0.0176231	Q54F76	101.3	Q54F76	90.3	Q54F76	19.3
Q54I93	0.361	0.19	0.525	0.0040857	0.00025933	0.0439294	Q54I93	100	Q54I93	36.1	Q54I93	19
Q54NS3	0.895	0.19	0.212	0.741382	0.00247794	0.0298075	Q54NS3	94	Q54NS3	84.1	Q54NS3	17.8
Q54SH9	0.45	0.19	0.422	0.00593839	0.00019559	0.0216902	Q54SH9	96.3	Q54SH9	43.3	Q54SH9	18.3
Q54TZ2	0.484	0.19	0.393	0.0683098	0.00480081	0.168824	Q54TZ2	100.3	Q54TZ2	48.5	Q54TZ2	19.1
Q54U14	0.244	0.19	0.778	0.0004953	0.00015229	0.435319	Q54U14	100	Q54U14	24.4	Q54U14	19
Q54WZ6	0.597	0.19	0.319	0.0733996	0.00029111	0.012313	Q54WZ6	100	Q54WZ6	59.7	Q54WZ6	19
Q556Y3	0.626	0.19	0.304	0.257538	0.00852099	0.114309	Q556Y3	95.3	Q556Y3	59.7	Q556Y3	18.2
Q558Z2	0.62	0.19	0.307	0.314537	0.00237502	0.0445904	Q558Z2	100	Q558Z2	62	Q558Z2	19
Q8T869	0.614	0.19	0.31	0.308946	0.0290777	0.272772	Q8T869	99.8	Q8T869	61.3	Q8T869	19
C7FZX1	0.656	0.189	0.288	0.20308	0.0017875	0.0439294	C7FZX1	101	C7FZX1	66.3	C7FZX1	19.1
Q1ZXH9	0.684	0.189	0.276	0.3449	0.0114338	0.117619	Q1ZXH9	101.2	Q1ZXH9	69.2	Q1ZXH9	19.1
Q54D69	0.555	0.189	0.34	0.0424026	0.00072426	0.0387904	Q54D69	99.7	Q54D69	55.3	Q54D69	18.8
Q54SG3	0.752	0.189	0.251	0.498322	0.0233836	0.151712	Q54SG3	100	Q54SG3	75.2	Q54SG3	18.9
Q54T45	0.663	0.189	0.285	0.378212	0.0085285	0.0928489	Q54T45	96.2	Q54T45	63.8	Q54T45	18.2
Q54Y32	0.444	0.189	0.426	0.0260933	0.00111377	0.077275	Q54Y32	101.3	Q54Y32	44.9	Q54Y32	19.2
Q54Y95	0.555	0.189	0.341	0.109842	0.00411669	0.108051	Q54Y95	102.9	Q54Y95	57.1	Q54Y95	19.4
Q559R8	0.651	0.189	0.291	0.264937	0.00164035	0.0360872	Q559R8	100	Q559R8	65.1	Q559R8	18.9
Q86HP9	0.493	0.189	0.382	0.113214	0.00569889	0.139163	Q86HP9	107.3	Q86HP9	53	Q86HP9	20.2
Q86K66	0.444	0.189	0.426	0.0140824	0.00060887	0.05916	Q86K66	102.4	Q86K66	45.4	Q86K66	19.3
Q9GPR2	0.355	0.189	0.533	0.00243199	0.00019182	0.0406422	Q9GPR2	100	Q9GPR2	35.5	Q9GPR2	18.9
O76173	0.645	0.188	0.292	0.150571	0.00042629	0.0144405	O76173	99.5	O76173	64.2	O76173	18.7
Q1ZXK9	0.528	0.188	0.357	0.0328934	0.00048616	0.0286187	Q1ZXK9	102.3	Q1ZXK9	54	Q1ZXK9	19.3
Q54E41	0.449	0.188	0.417	0.0400571	0.00165681	0.0893219	Q54E41	100	Q54E41	44.9	Q54E41	18.8
Q54IP8	0.348	0.188	0.54	0.0383266	0.00268078	0.144913	Q54IP8	97.7	Q54IP8	34	Q54IP8	18.4
Q54JT3	0.581	0.188	0.324	0.0615153	0.00038506	0.0175226	Q54JT3	98.9	Q54JT3	57.5	Q54JT3	18.6
Q54LH2	0.695	0.188	0.27	0.38528	0.00146191	0.0286503	Q54LH2	108.7	Q54LH2	75.6	Q54LH2	20.4
Q54PM5	0.607	0.188	0.309	0.193884	0.00593987	0.104739	Q54PM5	100	Q54PM5	60.7	Q54PM5	18.8
Q54RL6	0.604	0.188	0.311	0.173196	0.00532795	0.102931	Q54RL6	100	Q54RL6	60.4	Q54RL6	18.8
Q54S39	0.725	0.188	0.259	0.393615	0.0122369	0.11326	Q54S39	98.8	Q54S39	71.6	Q54S39	18.6
Q54TD6	0.97	0.188	0.194	0.999986	0.00177159	0.0179738	Q54TD6	100	Q54TD6	97	Q54TD6	18.8
Q54TY6	0.535	0.188	0.35	0.134314	0.0081134	0.169139	Q54TY6	95.1	Q54TY6	50.9	Q54TY6	17.9
Q54U09	0.982	0.188	0.191	0.857823	0.00314204	0.031357	Q54U09	109.1	Q54U09	107.1	Q54U09	20.5
Q54WY3	0.631	0.188	0.298	0.114404	0.00046564	0.0172846	Q54WY3	97.6	Q54WY3	61.6	Q54WY3	18.4
Q54XI6	0.291	0.188	0.647	0.00090158	0.00014894	0.08426	Q54XI6	100	Q54XI6	29.1	Q54XI6	18.8
Q553P6	0.723	0.188	0.261	0.3704	0.0101008	0.104739	Q553P6	94	Q553P6	68	Q553P6	17.7
Q556L7	0.796	0.188	0.236	0.527897	0.00148016	0.0254965	Q556L7	99.9	Q556L7	79.6	Q556L7	18.7
Q55D98	0.507	0.188	0.371	0.0655332	0.0011189	0.0488181	Q55D98	100	Q55D98	50.7	Q55D98	18.8
Q55DA4	0.604	0.188	0.312	0.0672987	0.00081119	0.0349413	Q55DA4	96.8	Q55DA4	58.5	Q55DA4	18.2
Q86IX2	0.524	0.188	0.359	0.069931	0.00177944	0.0713368	Q86IX2	100	Q86IX2	52.4	Q86IX2	18.8
Q54EJ0	0.893	0.187	0.209	0.842375	0.00259895	0.0281983	Q54EJ0	98.1	Q54EJ0	87.5	Q54EJ0	18.3
Q54KT3	0.724	0.187	0.259	0.312024	0.00825015	0.101123	Q54KT3	99.4	Q54KT3	72	Q54KT3	18.6
Q54L67	0.693	0.187	0.269	0.253276	0.00120196	0.0292828	Q54L67	100	Q54L67	69.3	Q54L67	18.7
Q54NA7	0.471	0.187	0.396	0.0249082	0.0006926	0.0490522	Q54NA7	100	Q54NA7	47.1	Q54NA7	18.7
Q54NM9	0.711	0.187	0.263	0.374699	0.0114877	0.111913	Q54NM9	98.8	Q54NM9	70.2	Q54NM9	18.5
Q54S26	0.853	0.187	0.219	0.64077	0.00079235	0.0148859	Q54S26	100	Q54S26	85.3	Q54S26	18.7
Q54SA3	0.346	0.187	0.542	0.00678942	0.00073454	0.130821	Q54SA3	132.1	Q54SA3	45.7	Q54SA3	24.7
Q54TH2	0.419	0.187	0.447	0.0135643	0.00073247	0.0751433	Q54TH2	101.4	Q54TH2	42.5	Q54TH2	19
Q54VS6	0.306	0.187	0.613	0.0287861	0.00784506	0.639184	Q54VS6	97.4	Q54VS6	29.8	Q54VS6	18.2
Q551J1	0.792	0.187	0.236	0.62011	0.00356691	0.0417221	Q551J1	100	Q551J1	79.2	Q551J1	18.7
Q552L6	0.452	0.187	0.413	0.020457	0.0006515	0.0513897	Q552L6	100.6	Q552L6	45.5	Q552L6	18.8
Q556W1	0.359	0.187	0.52	0.00694205	0.00054222	0.0844324	Q556W1	98.3	Q556W1	35.3	Q556W1	18.4
Q559U2	0.566	0.187	0.331	0.00070002	3.9606e-05	0.00231782	Q559U2	100	Q559U2	56.6	Q559U2	18.7
Q75JL6	0.554	0.187	0.337	0.0735696	0.00111715	0.0462295	Q75JL6	100	Q75JL6	55.4	Q75JL6	18.7
Q7KWS8	0.32	0.187	0.585	0.0197926	0.00291626	0.303341	Q7KWS8	100	Q7KWS8	32	Q7KWS8	18.7
Q86KC3	0.555	0.187	0.336	0.171515	0.00573756	0.108582	Q86KC3	98.5	Q86KC3	54.7	Q86KC3	18.4
Q54H40	0.358	0.186	0.518	0.0243166	0.00125831	0.0915954	Q54H40	94.5	Q54H40	33.9	Q54H40	17.5
Q54HM5	0.732	0.186	0.254	0.384651	0.00135062	0.0271989	Q54HM5	96.7	Q54HM5	70.8	Q54HM5	18
Q54JV6	0.471	0.186	0.395	0.140956	0.00941682	0.18627	Q54JV6	95.9	Q54JV6	45.2	Q54JV6	17.9
Q54MN3	0.287	0.186	0.649	0.0291836	0.00581621	0.467126	Q54MN3	100	Q54MN3	28.7	Q54MN3	18.6
Q54Q11	0.391	0.186	0.476	0.0133391	0.00101768	0.109946	Q54Q11	103.8	Q54Q11	40.6	Q54Q11	19.3
Q54Q94	0.299	0.186	0.623	0.0236839	0.00381001	0.352058	Q54Q94	100	Q54Q94	29.9	Q54Q94	18.6
Q54TP5	0.266	0.186	0.699	0.00010981	3.9606e-05	0.0184485	Q54TP5	100	Q54TP5	26.6	Q54TP5	18.6
Q54U96	0.842	0.186	0.221	0.583624	0.016164	0.105573	Q54U96	91.8	Q54U96	77.3	Q54U96	17.1
Q54XI0	0.808	0.186	0.231	0.648986	0.00180573	0.0263944	Q54XI0	100	Q54XI0	80.8	Q54XI0	18.6
Q54XT1	0.36	0.186	0.517	0.0062271	0.00050472	0.0839429	Q54XT1	102.9	Q54XT1	37	Q54XT1	19.2
Q54XT6	0.354	0.186	0.524	0.0120518	0.00089291	0.103281	Q54XT6	101.1	Q54XT6	35.8	Q54XT6	18.8
Q54Y80	0.475	0.186	0.392	0.0421682	0.00154096	0.0808877	Q54Y80	100	Q54Y80	47.5	Q54Y80	18.6
Q54YF9	0.583	0.186	0.319	0.189465	0.0108758	0.17052	Q54YF9	101.2	Q54YF9	59.1	Q54YF9	18.9
Q551H0	0.259	0.186	0.72	0.00529097	0.00087223	0.244118	Q551H0	99.5	Q551H0	25.7	Q551H0	18.5
Q554K2	0.583	0.186	0.319	0.0605108	0.00077047	0.0348479	Q554K2	95.3	Q554K2	55.6	Q554K2	17.8
Q55DJ2	0.411	0.186	0.452	0.045647	0.00366718	0.175435	Q55DJ2	81.2	Q55DJ2	33.3	Q55DJ2	15.1
Q55F68	0.467	0.186	0.399	0.0453582	0.00151794	0.0765615	Q55F68	96.9	Q55F68	45.2	Q55F68	18
Q769F7	0.635	0.186	0.293	0.291269	0.014156	0.155353	Q769F7	99.5	Q769F7	63.2	Q769F7	18.5
Q54DJ5	0.55	0.185	0.337	0.145645	0.0081167	0.159683	Q54DJ5	100.2	Q54DJ5	55.1	Q54DJ5	18.6
Q54GC3	0.708	0.185	0.261	0.517858	0.00332878	0.0441016	Q54GC3	100	Q54GC3	70.8	Q54GC3	18.5
Q54I22	0.52	0.185	0.356	0.120312	0.00630321	0.145921	Q54I22	100	Q54I22	52	Q54I22	18.5
Q54IG1	0.569	0.185	0.325	0.186195	0.0105285	0.168155	Q54IG1	100	Q54IG1	56.9	Q54IG1	18.5
Q54KQ7	0.484	0.185	0.383	0.0372955	0.00160233	0.0900607	Q54KQ7	97.1	Q54KQ7	47	Q54KQ7	18
Q54X37	0.363	0.185	0.51	0.0141878	0.00077088	0.076928	Q54X37	100	Q54X37	36.3	Q54X37	18.5
Q553U1	0.354	0.185	0.524	0.00186285	0.00013843	0.0282898	Q553U1	100	Q553U1	35.4	Q553U1	18.5
Q55BH7	0.663	0.185	0.279	0.294339	0.0114514	0.130843	Q55BH7	101.6	Q55BH7	67.4	Q55BH7	18.8
Q55BH8	0.601	0.185	0.308	0.112738	0.00069089	0.0250884	Q55BH8	99.8	Q55BH8	60	Q55BH8	18.5
Q55DD4	0.452	0.185	0.409	0.0100167	0.00037671	0.0396441	Q55DD4	96.2	Q55DD4	43.4	Q55DD4	17.8
Q55DN3	0.602	0.185	0.307	0.11235	0.00100216	0.0343871	Q55DN3	99.2	Q55DN3	59.7	Q55DN3	18.3
Q55GV0	0.594	0.185	0.311	0.200841	0.00967848	0.148472	Q55GV0	100.7	Q55GV0	59.8	Q55GV0	18.6
Q75JJ9	0.353	0.185	0.524	0.00564886	0.00037611	0.0596406	Q75JJ9	100	Q75JJ9	35.3	Q75JJ9	18.5
Q75JP4	0.727	0.185	0.254	0.537584	0.00404597	0.0490993	Q75JP4	100	Q75JP4	72.7	Q75JP4	18.5
Q76P11	0.659	0.185	0.281	0.300397	0.00142023	0.0313898	Q76P11	100	Q76P11	65.9	Q76P11	18.5
Q86IW5	0.471	0.185	0.393	0.0512133	0.00098477	0.0487978	Q86IW5	99.7	Q86IW5	46.9	Q86IW5	18.4
Q8T6J5	0.742	0.185	0.25	0.375453	0.00092765	0.0212003	Q8T6J5	99.7	Q8T6J5	74	Q8T6J5	18.5
Q9U7C9	0.589	0.185	0.314	0.176796	0.00717023	0.126736	Q9U7C9	98.4	Q9U7C9	57.9	Q9U7C9	18.2
P32254	0.527	0.184	0.35	0.0476839	0.00045659	0.0233077	P32254	100	P32254	52.7	P32254	18.4
Q54H95	0.588	0.184	0.313	0.117994	0.00069892	0.0249762	Q54H95	100	Q54H95	58.8	Q54H95	18.4
Q54IF2	0.356	0.184	0.516	0.016759	0.00138749	0.133776	Q54IF2	103	Q54IF2	36.7	Q54IF2	18.9
Q54IS7	0.306	0.184	0.601	0.00415702	0.0004181	0.0914188	Q54IS7	100	Q54IS7	30.6	Q54IS7	18.4
Q54KB3	0.767	0.184	0.24	0.429052	0.00054076	0.0127996	Q54KB3	100	Q54KB3	76.7	Q54KB3	18.4
Q54LW8	0.624	0.184	0.295	0.0820865	0.00085859	0.0341086	Q54LW8	104.8	Q54LW8	65.4	Q54LW8	19.3
Q54T76	0.421	0.184	0.438	0.043853	0.00282691	0.137989	Q54T76	100	Q54T76	42.1	Q54T76	18.4
Q54Y33	0.664	0.184	0.277	0.224702	0.00518959	0.0888227	Q54Y33	101.5	Q54Y33	67.4	Q54Y33	18.7
Q54ZK3	0.693	0.184	0.266	0.294785	0.00139761	0.0312428	Q54ZK3	105.5	Q54ZK3	73.1	Q54ZK3	19.4
Q557G0	0.422	0.184	0.437	0.110182	0.0111634	0.270479	Q557G0	100	Q557G0	42.2	Q557G0	18.4
Q55AW6	0.639	0.184	0.287	0.117822	0.00053314	0.0196346	Q55AW6	100	Q55AW6	63.9	Q55AW6	18.4
Q55DV5	0.425	0.184	0.433	0.0358281	0.00143556	0.0833352	Q55DV5	100	Q55DV5	42.5	Q55DV5	18.4
Q55G58	0.41	0.184	0.448	0.00427645	0.00017745	0.0230167	Q55G58	99.1	Q55G58	40.7	Q55G58	18.2
Q8T2J5	0.63	0.184	0.291	0.311104	0.0245304	0.23273	Q8T2J5	100.3	Q8T2J5	63.2	Q8T2J5	18.4
B0G182	0.762	0.183	0.241	0.428079	0.00810235	0.0843772	B0G182	100	B0G182	76.2	B0G182	18.3
Q54BH1	0.777	0.183	0.235	0.510549	0.00102057	0.0200072	Q54BH1	95.3	Q54BH1	74.1	Q54BH1	17.4
Q54CW9	0.785	0.183	0.233	0.441738	0.00117866	0.0235027	Q54CW9	98.8	Q54CW9	77.6	Q54CW9	18.1
Q54EQ1	0.646	0.183	0.284	0.328461	0.00664783	0.0860072	Q54EQ1	100	Q54EQ1	64.6	Q54EQ1	18.3
Q54K30	0.66	0.183	0.277	0.302515	0.00391484	0.0640085	Q54K30	99.3	Q54K30	65.5	Q54K30	18.1
Q54L85	0.605	0.183	0.302	0.21473	0.00851617	0.128234	Q54L85	110.3	Q54L85	66.7	Q54L85	20.2
Q54TU9	0.605	0.183	0.303	0.206476	0.00784506	0.123506	Q54TU9	98.2	Q54TU9	59.4	Q54TU9	18
Q54UB0	0.545	0.183	0.335	0.161303	0.0120786	0.211923	Q54UB0	100	Q54UB0	54.5	Q54UB0	18.3
Q54ZU0	0.474	0.183	0.387	0.0227987	0.00064648	0.0477698	Q54ZU0	100	Q54ZU0	47.4	Q54ZU0	18.3
Q550Z9	0.372	0.183	0.491	0.00171565	0.00014342	0.0327733	Q550Z9	100	Q550Z9	37.2	Q550Z9	18.3
Q552Y2	0.413	0.183	0.443	0.0230045	0.00072358	0.0535631	Q552Y2	106.5	Q552Y2	43.9	Q552Y2	19.5
Q55DJ3	0.284	0.183	0.643	0.0164628	0.00286299	0.368451	Q55DJ3	100	Q55DJ3	28.4	Q55DJ3	18.3
Q55FB4	0.59	0.183	0.309	0.0557108	0.00044676	0.0216902	Q55FB4	99.5	Q55FB4	58.8	Q55FB4	18.2
Q55GS3	0.442	0.183	0.413	0.00231994	9.524e-05	0.0120464	Q55GS3	96.4	Q55GS3	42.7	Q55GS3	17.6
Q86B10	0.31	0.183	0.589	0.0011122	0.00013723	0.0507407	Q86B10	100	Q86B10	31	Q86B10	18.3
C7G018	0.306	0.182	0.595	0.0221229	0.00359465	0.351854	C7G018	100	C7G018	30.6	C7G018	18.2
Q54BV7	0.372	0.182	0.491	0.0195484	0.00147962	0.127605	Q54BV7	100	Q54BV7	37.2	Q54BV7	18.2
Q54EN4	0.683	0.182	0.267	0.37104	0.0199232	0.16913	Q54EN4	100	Q54EN4	68.3	Q54EN4	18.2
Q54EX5	0.606	0.182	0.3	0.236947	0.0101615	0.138066	Q54EX5	99.2	Q54EX5	60.2	Q54EX5	18.1
Q54JA5	0.69	0.182	0.263	0.407823	0.0017049	0.0314861	Q54JA5	100	Q54JA5	69	Q54JA5	18.2
Q54KE5	0.682	0.182	0.267	0.192922	0.00113975	0.0314407	Q54KE5	100	Q54KE5	68.2	Q54KE5	18.2
Q54KJ9	0.381	0.182	0.478	0.0836854	0.0136329	0.424726	Q54KJ9	100	Q54KJ9	38.1	Q54KJ9	18.2
Q54NM8	0.299	0.182	0.609	0.00043996	7.7794e-05	0.0522717	Q54NM8	100.7	Q54NM8	30.1	Q54NM8	18.3
Q54NR5	0.444	0.182	0.408	0.0200185	0.00063337	0.0503777	Q54NR5	101	Q54NR5	44.9	Q54NR5	18.3
Q54QP2	0.602	0.182	0.302	0.190609	0.00547221	0.0998346	Q54QP2	100	Q54QP2	60.2	Q54QP2	18.2
Q54WA3	0.411	0.182	0.443	0.0161198	0.00067668	0.0615376	Q54WA3	98.6	Q54WA3	40.5	Q54WA3	18
Q54Y04	0.243	0.182	0.748	0.00329378	0.00090167	0.578074	Q54Y04	100	Q54Y04	24.3	Q54Y04	18.2
Q556P0	0.611	0.182	0.298	0.122037	0.00168374	0.0526784	Q556P0	100	Q556P0	61.1	Q556P0	18.2
Q559D0	0.329	0.182	0.553	0.00350646	0.00034521	0.0795347	Q559D0	107.1	Q559D0	35.2	Q559D0	19.5
Q55CZ0	0.51	0.182	0.357	0.0828354	0.00446699	0.137756	Q55CZ0	103.1	Q55CZ0	52.6	Q55CZ0	18.8
Q8MQU6	0.488	0.182	0.372	0.0537925	0.00144484	0.0678968	Q8MQU6	100	Q8MQU6	48.8	Q8MQU6	18.2
Q54EN7	0.841	0.181	0.215	0.675647	0.0018929	0.026708	Q54EN7	100	Q54EN7	84.1	Q54EN7	18.1
Q54F99	0.42	0.181	0.431	0.435388	0.0333655	0.224253	Q54F99	230	Q54F99	96.7	Q54F99	41.7
Q54FB9	0.606	0.181	0.299	0.129906	0.00135327	0.042659	Q54FB9	100	Q54FB9	60.6	Q54FB9	18.1
Q54P68	0.765	0.181	0.237	0.560893	0.00165251	0.0267135	Q54P68	100	Q54P68	76.5	Q54P68	18.1
Q54QE1	0.642	0.181	0.282	0.271324	0.00128715	0.0300872	Q54QE1	100.5	Q54QE1	64.5	Q54QE1	18.2
Q54QQ2	0.27	0.181	0.669	0.0275341	0.00588523	0.501203	Q54QQ2	100	Q54QQ2	27	Q54QQ2	18.1
Q54RN1	0.833	0.181	0.217	0.664767	0.00098295	0.0172846	Q54RN1	98.1	Q54RN1	81.8	Q54RN1	17.8
Q54RX2	0.472	0.181	0.384	0.00934443	0.00018611	0.0155606	Q54RX2	99.4	Q54RX2	46.9	Q54RX2	18
Q54UZ7	0.42	0.181	0.432	0.0143054	0.00064761	0.0630369	Q54UZ7	90.8	Q54UZ7	38.1	Q54UZ7	16.5
Q54VI7	0.629	0.181	0.287	0.228597	0.00273544	0.0567185	Q54VI7	103.8	Q54VI7	65.2	Q54VI7	18.7
Q54X80	0.876	0.181	0.207	0.891656	0.00087749	0.0134948	Q54X80	100	Q54X80	87.6	Q54X80	18.1
Q54YP0	0.61	0.181	0.297	0.246488	0.00276493	0.0551888	Q54YP0	101.1	Q54YP0	61.7	Q54YP0	18.3
Q550V0	0.327	0.181	0.553	0.015623	0.00200748	0.2367	Q550V0	100	Q550V0	32.7	Q550V0	18.1
Q555C4	0.73	0.181	0.247	0.121354	0.00060887	0.0222073	Q555C4	100	Q555C4	73	Q555C4	18.1
Q55B15	0.645	0.181	0.281	0.271471	0.00233905	0.0475522	Q55B15	100	Q55B15	64.5	Q55B15	18.1
Q55F47	0.411	0.181	0.442	0.0122776	0.00049363	0.0503777	Q55F47	92.3	Q55F47	38	Q55F47	16.8
Q86HC5	0.261	0.181	0.691	0.0013377	0.00033195	0.361488	Q86HC5	100	Q86HC5	26.1	Q86HC5	18.1
O76329	0.453	0.18	0.396	0.0243659	0.00089983	0.0658374	O76329	100	O76329	45.3	O76329	18
P34143	0.436	0.18	0.414	0.00382524	0.00010694	0.0110178	P34143	101	P34143	44	P34143	18.2
Q23915	0.547	0.18	0.33	0.0128431	0.00011479	0.00773531	Q23915	99.1	Q23915	54.2	Q23915	17.9
Q54B45	0.569	0.18	0.316	0.15804	0.00527188	0.107034	Q54B45	91.2	Q54B45	51.9	Q54B45	16.4
Q54BH4	0.356	0.18	0.506	0.0233977	0.00132821	0.0996249	Q54BH4	100	Q54BH4	35.6	Q54BH4	18
Q54DU3	0.446	0.18	0.404	0.0330908	0.00197816	0.117474	Q54DU3	100	Q54DU3	44.6	Q54DU3	18
Q54ED1	0.636	0.18	0.282	0.25782	0.00093886	0.0244642	Q54ED1	100	Q54ED1	63.6	Q54ED1	18
Q54F38	0.446	0.18	0.404	0.036105	0.00076987	0.0452296	Q54F38	100	Q54F38	44.6	Q54F38	18
Q54FY0	0.276	0.18	0.653	0.00151901	0.00029025	0.182951	Q54FY0	100	Q54FY0	27.6	Q54FY0	18
Q54I84	0.817	0.18	0.22	0.601908	0.00103781	0.0189311	Q54I84	99.5	Q54I84	81.3	Q54I84	17.9
Q54K74	0.654	0.18	0.276	0.294168	0.0136227	0.14964	Q54K74	101.2	Q54K74	66.2	Q54K74	18.2
Q54M21	0.581	0.18	0.31	0.233176	0.0166787	0.211136	Q54M21	99.5	Q54M21	57.8	Q54M21	17.9
Q54MD1	0.448	0.18	0.402	0.0599749	0.00328023	0.128482	Q54MD1	100	Q54MD1	44.8	Q54MD1	18
Q54QP6	0.271	0.18	0.664	0.00315706	0.000404	0.115682	Q54QP6	103	Q54QP6	27.9	Q54QP6	18.5
Q54RZ3	0.679	0.18	0.265	0.379057	0.00243919	0.0416529	Q54RZ3	102.2	Q54RZ3	69.3	Q54RZ3	18.4
Q54S81	0.249	0.18	0.723	0.0545096	0.00844608	0.383452	Q54S81	100.5	Q54S81	25.1	Q54S81	18.1
Q54SV2	0.652	0.18	0.276	0.249557	0.00778027	0.109301	Q54SV2	100	Q54SV2	65.2	Q54SV2	18
Q54XX1	0.627	0.18	0.287	0.214523	0.0059846	0.0998346	Q54XX1	100	Q54XX1	62.7	Q54XX1	18
Q54YV7	0.407	0.18	0.442	0.00215923	0.00012838	0.0216949	Q54YV7	104	Q54YV7	42.3	Q54YV7	18.7
Q55BI4	0.406	0.18	0.444	0.00672976	0.00032578	0.0424966	Q55BI4	100	Q55BI4	40.6	Q55BI4	18
Q55BK1	0.574	0.18	0.313	0.200837	0.0102155	0.155353	Q55BK1	100	Q55BK1	57.4	Q55BK1	18
Q55CJ5	0.765	0.18	0.235	0.492869	0.0015365	0.0269278	Q55CJ5	100.9	Q55CJ5	77.2	Q55CJ5	18.2
Q55CV1	0.305	0.18	0.591	0.0141977	0.00258708	0.383377	Q55CV1	103.1	Q55CV1	31.4	Q55CV1	18.6
Q55GT0	0.67	0.18	0.269	0.263725	0.00101693	0.0253734	Q55GT0	99.2	Q55GT0	66.4	Q55GT0	17.9
Q54EB9	0.74	0.179	0.242	0.451335	0.00892788	0.0873128	Q54EB9	95.4	Q54EB9	70.6	Q54EB9	17
Q54K99	0.583	0.179	0.308	0.250404	0.00715266	0.103505	Q54K99	98.2	Q54K99	57.2	Q54K99	17.6
Q54MP1	0.515	0.179	0.347	0.130197	0.00732628	0.157863	Q54MP1	98.3	Q54MP1	50.7	Q54MP1	17.6
Q54NM4	0.348	0.179	0.515	0.00859706	0.00080121	0.117778	Q54NM4	102.8	Q54NM4	35.8	Q54NM4	18.4
Q54TL0	0.647	0.179	0.277	0.147133	0.00063238	0.0216062	Q54TL0	97.3	Q54TL0	62.9	Q54TL0	17.4
Q54W52	0.289	0.179	0.619	0.0246182	0.00320342	0.268412	Q54W52	99.2	Q54W52	28.6	Q54W52	17.7
Q55D05	0.365	0.179	0.49	0.0036106	0.00021593	0.0349413	Q55D05	100	Q55D05	36.5	Q55D05	17.9
Q55EJ2	0.831	0.179	0.216	0.820138	0.00174451	0.0230167	Q55EJ2	97.9	Q55EJ2	81.3	Q55EJ2	17.6
Q869R3	0.468	0.179	0.382	0.0289075	0.00094264	0.0624765	Q869R3	100.1	Q869R3	46.9	Q869R3	17.9
Q8T268	0.327	0.179	0.545	0.0217805	0.00408452	0.421851	Q8T268	100.1	Q8T268	32.8	Q8T268	17.9
Q95ZG4	0.464	0.179	0.385	0.0245041	0.00033195	0.0216411	Q95ZG4	100	Q95ZG4	46.4	Q95ZG4	17.9
P08796	0.895	0.178	0.199	0.879824	0.00234675	0.0256354	P08796	93.8	P08796	83.9	P08796	16.7
Q54E34	0.426	0.178	0.416	0.0138796	0.00054697	0.0526549	Q54E34	101	Q54E34	43.1	Q54E34	17.9
Q54GW1	0.475	0.178	0.375	0.0438193	0.00078943	0.041973	Q54GW1	99.4	Q54GW1	47.2	Q54GW1	17.7
Q54H47	0.659	0.178	0.27	0.240244	0.00240512	0.0511653	Q54H47	98.7	Q54H47	65	Q54H47	17.6
Q54KL3	0.589	0.178	0.301	0.102629	0.00078765	0.0290517	Q54KL3	101.6	Q54KL3	59.8	Q54KL3	18
Q54L07	0.594	0.178	0.299	0.216677	0.00999727	0.144967	Q54L07	98	Q54L07	58.3	Q54L07	17.4
Q54LH0	0.497	0.178	0.357	0.0739898	0.0034288	0.116408	Q54LH0	98.9	Q54LH0	49.1	Q54LH0	17.6
Q54MZ0	0.557	0.178	0.319	0.0579228	0.00089247	0.0417096	Q54MZ0	100.6	Q54MZ0	56	Q54MZ0	17.9
Q54P80	0.52	0.178	0.343	0.167248	0.010755	0.184476	Q54P80	104.7	Q54P80	54.4	Q54P80	18.6
Q54Q95	0.433	0.178	0.411	0.031583	0.00087705	0.0550361	Q54Q95	101.9	Q54Q95	44.2	Q54Q95	18.1
Q54R87	0.414	0.178	0.43	0.0260647	0.00145294	0.101703	Q54R87	100.9	Q54R87	41.7	Q54R87	18
Q54TV8	0.233	0.178	0.766	0.0175604	0.00353941	0.45142	Q54TV8	96.1	Q54TV8	22.4	Q54TV8	17.1
Q551H4	0.747	0.178	0.238	0.418414	0.0023692	0.0387706	Q551H4	100	Q551H4	74.7	Q551H4	17.8
Q55B24	0.475	0.178	0.375	0.0188228	0.00063703	0.0525978	Q55B24	98.6	Q55B24	46.8	Q55B24	17.6
Q55FL5	0.605	0.178	0.295	0.232416	0.0111404	0.150558	Q55FL5	100	Q55FL5	60.5	Q55FL5	17.8
Q55FW3	0.639	0.178	0.279	0.341727	0.00331699	0.0540539	Q55FW3	99.7	Q55FW3	63.7	Q55FW3	17.8
Q7KWY3	0.584	0.178	0.305	0.0585732	0.00071828	0.0331208	Q7KWY3	99.5	Q7KWY3	58.1	Q7KWY3	17.8
Q86HN7	0.614	0.178	0.29	0.136639	0.00288703	0.0752236	Q86HN7	100	Q86HN7	61.4	Q86HN7	17.8
Q8MYF2	0.449	0.178	0.396	0.0032501	0.00010554	0.0120047	Q8MYF2	98.3	Q8MYF2	44.2	Q8MYF2	17.5
Q8T2J7	0.343	0.178	0.519	0.0124831	0.00079207	0.087582	Q8T2J7	101.1	Q8T2J7	34.7	Q8T2J7	18
B0G0Z6	0.375	0.177	0.472	0.00845088	0.00069225	0.099385	B0G0Z6	100	B0G0Z6	37.5	B0G0Z6	17.7
Q54CK2	0.407	0.177	0.434	0.0279659	0.00196247	0.131672	Q54CK2	100	Q54CK2	40.7	Q54CK2	17.7
Q54F86	0.504	0.177	0.352	0.101196	0.00443918	0.12035	Q54F86	100	Q54F86	50.4	Q54F86	17.7
Q54FD6	0.408	0.177	0.434	0.0436148	0.00227234	0.111277	Q54FD6	100	Q54FD6	40.8	Q54FD6	17.7
Q54H59	0.64	0.177	0.277	0.22839	0.00098199	0.0259024	Q54H59	100	Q54H59	64	Q54H59	17.7
Q54HI6	0.509	0.177	0.349	0.125106	0.00172272	0.0529352	Q54HI6	100	Q54HI6	50.9	Q54HI6	17.7
Q54J81	0.316	0.177	0.56	0.00491311	0.00058394	0.129735	Q54J81	101.6	Q54J81	32.1	Q54J81	18
Q54LT2	0.453	0.177	0.391	0.0271159	0.00058425	0.0383839	Q54LT2	100	Q54LT2	45.3	Q54LT2	17.7
Q54QM6	0.411	0.177	0.432	0.040725	0.00211652	0.109301	Q54QM6	100	Q54QM6	41.1	Q54QM6	17.7
Q54VN3	0.622	0.177	0.284	0.267522	0.01314	0.155447	Q54VN3	100	Q54VN3	62.2	Q54VN3	17.7
Q54WK0	0.598	0.177	0.297	0.230161	0.00878904	0.125986	Q54WK0	91.4	Q54WK0	54.7	Q54WK0	16.2
Q54WR8	0.437	0.177	0.403	0.0298804	0.0010705	0.0697351	Q54WR8	100	Q54WR8	43.7	Q54WR8	17.7
Q54XG0	0.436	0.177	0.407	0.027956	0.00079805	0.0536374	Q54XG0	97.9	Q54XG0	42.7	Q54XG0	17.4
Q54Y38	0.229	0.177	0.77	0.00026206	5.5433e-05	0.0594294	Q54Y38	100	Q54Y38	22.9	Q54Y38	17.7
Q54YB2	0.702	0.177	0.252	0.357136	0.00799535	0.0918782	Q54YB2	99.5	Q54YB2	69.8	Q54YB2	17.6
Q55BV4	0.69	0.177	0.256	0.355119	0.0202214	0.176703	Q55BV4	100	Q55BV4	69	Q55BV4	17.7
Q55D91	0.734	0.177	0.241	0.433575	0.00121847	0.0244642	Q55D91	100	Q55D91	73.4	Q55D91	17.7
Q6TMJ4	0.594	0.177	0.299	0.199956	0.00724465	0.117845	Q6TMJ4	102.3	Q6TMJ4	60.8	Q6TMJ4	18.2
Q76NV1	0.291	0.177	0.606	0.00434951	0.00046192	0.102024	Q76NV1	101	Q76NV1	29.4	Q76NV1	17.9
Q7KWR7	0.512	0.177	0.346	0.151778	0.00896068	0.169306	Q7KWR7	100	Q7KWR7	51.2	Q7KWR7	17.7
Q86AH0	0.588	0.177	0.3	0.161404	0.00208926	0.0544587	Q86AH0	112.7	Q86AH0	66.3	Q86AH0	19.9
Q86K35	0.533	0.177	0.333	0.0649871	0.0018245	0.0752198	Q86K35	105.7	Q86K35	56.3	Q86K35	18.8
Q9GPS6	0.343	0.177	0.517	0.00073801	8.0892e-05	0.0249493	Q9GPS6	98.2	Q9GPS6	33.6	Q9GPS6	17.4
B0G0Y4	0.464	0.176	0.378	0.0508662	0.00222883	0.100873	B0G0Y4	100	B0G0Y4	46.4	B0G0Y4	17.6
Q54EB4	0.584	0.176	0.301	0.20796	0.00825634	0.127724	Q54EB4	98.4	Q54EB4	57.4	Q54EB4	17.3
Q54FZ1	0.343	0.176	0.513	0.0103582	0.00085859	0.110402	Q54FZ1	100	Q54FZ1	34.3	Q54FZ1	17.6
Q54HS1	0.433	0.176	0.406	0.0178976	0.00076875	0.0668024	Q54HS1	111.9	Q54HS1	48.4	Q54HS1	19.7
Q54KJ7	0.401	0.176	0.44	0.0658853	0.00885565	0.336474	Q54KJ7	103.5	Q54KJ7	41.5	Q54KJ7	18.3
Q54L23	0.428	0.176	0.412	0.0485432	0.00241544	0.110328	Q54L23	100	Q54L23	42.8	Q54L23	17.6
Q54P59	0.731	0.176	0.241	0.394578	0.00655386	0.0770262	Q54P59	99.1	Q54P59	72.4	Q54P59	17.4
Q54PE8	0.734	0.176	0.24	0.398568	0.0103849	0.10206	Q54PE8	99.4	Q54PE8	73	Q54PE8	17.5
Q54PI5	0.274	0.176	0.642	0.034109	0.0100868	0.6892	Q54PI5	88.2	Q54PI5	24.2	Q54PI5	15.5
Q54TT9	0.541	0.176	0.326	0.0359283	0.00049746	0.0282119	Q54TT9	98.8	Q54TT9	53.4	Q54TT9	17.4
Q54VH3	0.357	0.176	0.492	0.0187495	0.00102955	0.0885007	Q54VH3	100.1	Q54VH3	35.8	Q54VH3	17.6
Q54WJ0	0.36	0.176	0.49	0.0191192	0.00189445	0.176097	Q54WJ0	103.5	Q54WJ0	37.2	Q54WJ0	18.3
Q555B8	0.425	0.176	0.413	0.0192079	0.00075244	0.0621999	Q555B8	100	Q555B8	42.5	Q555B8	17.6
Q555L7	0.408	0.176	0.431	0.0113945	0.0005088	0.0544587	Q555L7	103.2	Q555L7	42.1	Q555L7	18.2
Q55CT1	0.53	0.176	0.332	0.165297	0.0125268	0.215151	Q55CT1	100	Q55CT1	53	Q55CT1	17.6
Q55E97	1.461	0.176	0.121	0.610139	0.00490902	0.020025	Q55E97	100	Q55E97	146.1	Q55E97	17.6
Q55EB8	0.284	0.176	0.621	0.00835831	0.00131433	0.266818	Q55EB8	100.6	Q55EB8	28.5	Q55EB8	17.7
Q55FD0	0.555	0.176	0.318	0.130205	0.00442414	0.104739	Q55FD0	100	Q55FD0	55.5	Q55FD0	17.6
Q55FR4	0.449	0.176	0.392	0.0264757	0.00106757	0.0743075	Q55FR4	102.4	Q55FR4	46	Q55FR4	18
Q54F47	0.498	0.175	0.352	0.0929832	0.00535426	0.150365	Q54F47	102.8	Q54F47	51.2	Q54F47	18
Q54JH5	0.662	0.175	0.265	0.279726	0.00870988	0.110869	Q54JH5	105.6	Q54JH5	69.9	Q54JH5	18.5
Q54MR8	0.45	0.175	0.389	0.0175604	0.00048404	0.0389603	Q54MR8	100.7	Q54MR8	45.3	Q54MR8	17.6
Q54MT0	0.602	0.175	0.291	0.252579	0.00700048	0.101566	Q54MT0	100	Q54MT0	60.2	Q54MT0	17.5
Q54QE0	0.676	0.175	0.259	0.293662	0.00060396	0.0161729	Q54QE0	100	Q54QE0	67.6	Q54QE0	17.5
Q54W55	0.443	0.175	0.394	0.0827754	0.00237641	0.082121	Q54W55	101.1	Q54W55	44.8	Q54W55	17.7
Q555V7	0.618	0.175	0.283	0.193238	0.00326522	0.0701244	Q555V7	100	Q555V7	61.8	Q555V7	17.5
Q55E19	0.539	0.175	0.326	0.160358	0.00956281	0.172159	Q55E19	100	Q55E19	53.9	Q55E19	17.5
Q55F12	0.638	0.175	0.275	0.185245	0.00213598	0.0526549	Q55F12	100	Q55F12	63.8	Q55F12	17.5
Q55FS7	0.398	0.175	0.44	0.00851012	0.00038325	0.0456195	Q55FS7	100	Q55FS7	39.8	Q55FS7	17.5
Q86B05	0.284	0.175	0.616	0.0306309	0.00463611	0.340175	Q86B05	97.6	Q86B05	27.7	Q86B05	17
B0G121	0.327	0.174	0.53	0.0241924	0.00303837	0.255249	B0G121	100.1	B0G121	32.8	B0G121	17.4
P18613	0.518	0.174	0.335	0.0370678	0.00044789	0.0250884	P18613	100	P18613	51.8	P18613	17.4
Q54C85	0.214	0.174	0.811	0.00043129	9.9531e-05	0.125409	Q54C85	100	Q54C85	21.4	Q54C85	17.4
Q54IB7	0.429	0.174	0.407	0.0199635	0.00086259	0.0709813	Q54IB7	104.5	Q54IB7	44.8	Q54IB7	18.2
Q54L53	0.382	0.174	0.455	0.126592	0.00245495	0.0693698	Q54L53	100	Q54L53	38.2	Q54L53	17.4
Q54RB1	0.415	0.174	0.418	0.0212568	0.00121107	0.0963159	Q54RB1	102.5	Q54RB1	42.6	Q54RB1	17.8
Q54U33	0.542	0.174	0.322	0.176688	0.00733284	0.128911	Q54U33	93.5	Q54U33	50.7	Q54U33	16.3
Q54VT5	0.496	0.174	0.35	0.102204	0.00522023	0.137716	Q54VT5	99.6	Q54VT5	49.5	Q54VT5	17.3
Q54W89	0.566	0.174	0.307	0.12461	0.00358768	0.0916738	Q54W89	100	Q54W89	56.6	Q54W89	17.4
Q558Y3	0.703	0.174	0.247	0.474299	0.00198357	0.0324764	Q558Y3	100	Q558Y3	70.3	Q558Y3	17.4
Q55B99	0.578	0.174	0.301	0.1036	0.00180021	0.059485	Q55B99	102.7	Q55B99	59.4	Q55B99	17.9
Q7KWL3	0.314	0.174	0.554	0.0242529	0.00325351	0.278424	Q7KWL3	98.4	Q7KWL3	30.9	Q7KWL3	17.1
Q86KP9	0.587	0.174	0.296	0.197001	0.00168498	0.0425609	Q86KP9	96.6	Q86KP9	56.7	Q86KP9	16.8
Q8T282	0.733	0.174	0.237	0.292391	0.00051288	0.0139671	Q8T282	98.7	Q8T282	72.4	Q8T282	17.2
Q54CW3	0.521	0.173	0.332	0.132	0.00590065	0.129735	Q54CW3	100	Q54CW3	52.1	Q54CW3	17.3
Q54GR7	0.51	0.173	0.338	0.117028	0.00189605	0.058908	Q54GR7	100	Q54GR7	51	Q54GR7	17.3
Q54HC8	0.659	0.173	0.263	0.367387	0.00146741	0.0295057	Q54HC8	100	Q54HC8	65.9	Q54HC8	17.3
Q54Q60	0.394	0.173	0.438	0.0263518	0.00141082	0.0980777	Q54Q60	100	Q54Q60	39.4	Q54Q60	17.3
Q54SG1	0.412	0.173	0.419	0.0223967	0.00096794	0.0742016	Q54SG1	100	Q54SG1	41.2	Q54SG1	17.3
Q54X23	0.335	0.173	0.516	0.00470395	0.00025277	0.0367652	Q54X23	100	Q54X23	33.5	Q54X23	17.3
Q54XB2	0.298	0.173	0.582	0.0169584	0.00323026	0.41746	Q54XB2	100	Q54XB2	29.8	Q54XB2	17.3
Q54XQ6	0.295	0.173	0.586	0.00144031	0.00026087	0.152614	Q54XQ6	99.9	Q54XQ6	29.5	Q54XQ6	17.2
Q54YF6	1.104	0.173	0.157	0.578516	0.00024229	0.00579365	Q54YF6	94.9	Q54YF6	104.8	Q54YF6	16.4
Q54ZX7	0.401	0.173	0.43	0.0155239	0.00074062	0.0700035	Q54ZX7	104	Q54ZX7	41.7	Q54ZX7	17.9
Q55BS3	0.644	0.173	0.269	0.227733	0.00455762	0.0805258	Q55BS3	100	Q55BS3	64.4	Q55BS3	17.3
Q55CT7	0.564	0.173	0.307	0.158108	0.0052641	0.106986	Q55CT7	100.1	Q55CT7	56.5	Q55CT7	17.4
Q55D20	0.367	0.173	0.472	0.0197291	0.0007518	0.0612169	Q55D20	97.6	Q55D20	35.8	Q55D20	16.9
Q76NW7	0.405	0.173	0.427	0.0426165	0.00307411	0.153882	Q76NW7	100	Q76NW7	40.5	Q76NW7	17.3
Q8STF9	1.167	0.173	0.149	0.828248	0.00175523	0.0138744	Q8STF9	94.7	Q8STF9	110.5	Q8STF9	16.4
Q54JW8	0.6	0.172	0.287	0.216628	0.00637112	0.10339	Q54JW8	100	Q54JW8	60	Q54JW8	17.2
Q54LQ0	0.313	0.172	0.548	0.0295432	0.00316573	0.218662	Q54LQ0	100	Q54LQ0	31.3	Q54LQ0	17.2
Q54LW5	0.376	0.172	0.458	0.0149604	0.00091238	0.0902323	Q54LW5	100	Q54LW5	37.6	Q54LW5	17.2
Q54M62	0.461	0.172	0.373	0.0302791	0.00091776	0.059178	Q54M62	100	Q54M62	46.1	Q54M62	17.2
Q54N73	0.508	0.172	0.338	0.0439623	0.00043129	0.0230081	Q54N73	102.3	Q54N73	52	Q54N73	17.6
Q54QQ3	0.447	0.172	0.384	0.105355	0.00204579	0.0657713	Q54QQ3	100	Q54QQ3	44.7	Q54QQ3	17.2
Q54SS3	0.447	0.172	0.384	0.0969072	0.00867039	0.233192	Q54SS3	104.1	Q54SS3	46.5	Q54SS3	17.9
Q54TS2	0.321	0.172	0.536	0.00066439	6.4792e-05	0.01625	Q54TS2	100	Q54TS2	32.1	Q54TS2	17.2
Q54W56	0.402	0.172	0.428	0.0279966	0.00155928	0.103965	Q54W56	102.7	Q54W56	41.3	Q54W56	17.7
Q54XC3	0.436	0.172	0.394	0.0237742	0.00087575	0.0647682	Q54XC3	101.5	Q54XC3	44.3	Q54XC3	17.5
Q55AQ3	0.65	0.172	0.265	0.226377	0.00595678	0.0968783	Q55AQ3	90.7	Q55AQ3	59	Q55AQ3	15.6
Q55DC1	0.252	0.172	0.683	0.00493688	0.00079119	0.223913	Q55DC1	100	Q55DC1	25.2	Q55DC1	17.2
Q55DL5	0.5	0.172	0.344	0.0553945	0.00077243	0.0363116	Q55DL5	93.5	Q55DL5	46.7	Q55DL5	16.1
Q86IH5	0.263	0.172	0.654	0.00020102	3.9992e-05	0.0168019	Q86IH5	98.1	Q86IH5	25.8	Q86IH5	16.9
Q9UAG7	0.262	0.172	0.657	0.00293298	0.00036027	0.104468	Q9UAG7	100.1	Q9UAG7	26.2	Q9UAG7	17.2
P54660	1.137	0.171	0.151	0.907738	0.00121877	0.0120047	P54660	100	P54660	113.7	P54660	17.1
Q1ZXL7	0.58	0.171	0.295	0.115935	0.00249194	0.07309	Q1ZXL7	100	Q1ZXL7	58	Q1ZXL7	17.1
Q54BT3	0.652	0.171	0.263	0.287028	0.00142031	0.0318812	Q54BT3	99.5	Q54BT3	64.9	Q54BT3	17.1
Q54LF1	0.407	0.171	0.42	0.0210394	0.00135834	0.108824	Q54LF1	100	Q54LF1	40.7	Q54LF1	17.1
Q54LP3	0.619	0.171	0.275	0.210542	0.00564905	0.0969607	Q54LP3	100.3	Q54LP3	62.1	Q54LP3	17.1
Q54M52	0.409	0.171	0.418	0.0204253	0.00093692	0.0756627	Q54M52	97.3	Q54M52	39.8	Q54M52	16.7
Q54ML4	0.301	0.171	0.568	0.0181592	0.00247283	0.266356	Q54ML4	100	Q54ML4	30.1	Q54ML4	17.1
Q54QE9	0.441	0.171	0.387	0.0573347	0.00146191	0.0665759	Q54QE9	94.5	Q54QE9	41.6	Q54QE9	16.1
Q54QF2	0.241	0.171	0.707	0.0456039	0.00758084	0.402856	Q54QF2	100	Q54QF2	24.1	Q54QF2	17.1
Q54VY8	0.449	0.171	0.38	0.0187292	0.00070456	0.0588917	Q54VY8	100	Q54VY8	44.9	Q54VY8	17.1
Q54XB5	0.648	0.171	0.264	0.398178	0.0364815	0.263729	Q54XB5	100	Q54XB5	64.8	Q54XB5	17.1
Q54Z25	0.428	0.171	0.401	0.0174048	0.00054155	0.0454804	Q54Z25	103.1	Q54Z25	44.1	Q54Z25	17.7
Q550C4	0.546	0.171	0.314	0.0784365	0.00096808	0.0389144	Q550C4	100	Q550C4	54.6	Q550C4	17.1
Q554N4	0.36	0.171	0.474	0.00847558	0.00046192	0.0587293	Q554N4	102	Q554N4	36.8	Q554N4	17.4
Q55EX4	0.292	0.171	0.585	0.0154001	0.00327017	0.473672	Q55EX4	100	Q55EX4	29.2	Q55EX4	17.1
Q55FJ8	0.492	0.171	0.347	0.0119945	0.0003005	0.0266689	Q55FJ8	104.2	Q55FJ8	51.3	Q55FJ8	17.8
Q869Y3	0.618	0.171	0.276	0.26114	0.00973485	0.125551	Q869Y3	98.7	Q869Y3	61	Q869Y3	16.9
O76542	0.304	0.17	0.559	0.0513047	0.021809	0.866971	O76542	103.8	O76542	31.6	O76542	17.7
Q1ZXN8	0.298	0.17	0.571	0.0235411	0.00324121	0.286348	Q1ZXN8	100	Q1ZXN8	29.8	Q1ZXN8	17
Q54BL2	0.29	0.17	0.584	0.0263616	0.00502263	0.439718	Q54BL2	97.9	Q54BL2	28.4	Q54BL2	16.6
Q54BN8	0.499	0.17	0.341	0.019639	0.00029917	0.0211518	Q54BN8	100	Q54BN8	49.9	Q54BN8	17
Q54CK5	0.594	0.17	0.286	0.111653	0.00087009	0.0309588	Q54CK5	100.2	Q54CK5	59.5	Q54CK5	17
Q54DD1	0.26	0.17	0.655	0.00025187	4.7955e-05	0.032242	Q54DD1	100	Q54DD1	26	Q54DD1	17
Q54G70	0.29	0.17	0.588	0.00095927	0.00013834	0.0640979	Q54G70	100.5	Q54G70	29.2	Q54G70	17.1
Q54I21	0.551	0.17	0.308	0.123239	0.00404404	0.100822	Q54I21	100	Q54I21	55.1	Q54I21	17
Q54JJ9	0.657	0.17	0.259	0.153807	0.00055766	0.0186586	Q54JJ9	100	Q54JJ9	65.7	Q54JJ9	17
Q54M63	0.607	0.17	0.28	0.236746	0.0231949	0.281418	Q54M63	105.7	Q54M63	64.1	Q54M63	18
Q54PB2	0.296	0.17	0.576	0.0211309	0.00328256	0.329327	Q54PB2	100	Q54PB2	29.6	Q54PB2	17
Q54UZ8	0.363	0.17	0.469	0.0144874	0.00121524	0.128633	Q54UZ8	101.1	Q54UZ8	36.7	Q54UZ8	17.2
Q55DW4	0.755	0.17	0.226	0.533024	0.00181896	0.0291151	Q55DW4	100	Q55DW4	75.5	Q55DW4	17
Q55F26	0.46	0.17	0.37	0.0412623	0.00140812	0.0755778	Q55F26	100	Q55F26	46	Q55F26	17
Q86IA3	0.561	0.17	0.303	0.212083	0.0148592	0.205297	Q86IA3	100	Q86IA3	56.1	Q86IA3	17
Q86KB5	0.454	0.17	0.375	0.0408142	0.00148971	0.0797016	Q86KB5	100.3	Q86KB5	45.5	Q86KB5	17.1
Q1ZXC2	0.544	0.169	0.31	0.141707	0.00700086	0.143551	Q1ZXC2	104.9	Q1ZXC2	57	Q1ZXC2	17.7
Q54DG5	0.779	0.169	0.217	0.547087	0.00160838	0.0266314	Q54DG5	100	Q54DG5	77.9	Q54DG5	16.9
Q54FE3	0.375	0.169	0.451	0.012452	0.00091997	0.103877	Q54FE3	97.5	Q54FE3	36.6	Q54FE3	16.5
Q54FH7	0.635	0.169	0.267	0.27008	0.0069086	0.0973806	Q54FH7	95.3	Q54FH7	60.6	Q54FH7	16.2
Q54GX9	0.5	0.169	0.338	0.0693345	0.00073134	0.0318587	Q54GX9	98.6	Q54GX9	49.3	Q54GX9	16.6
Q54IP4	0.388	0.169	0.435	0.0319194	0.00218694	0.133826	Q54IP4	101.1	Q54IP4	39.3	Q54IP4	17.1
Q54L31	0.685	0.169	0.247	0.307126	0.0013755	0.0301141	Q54L31	104.1	Q54L31	71.4	Q54L31	17.6
Q54M29	0.421	0.169	0.401	0.0444763	0.00119433	0.0625651	Q54M29	100	Q54M29	42.1	Q54M29	16.9
Q54PL7	0.327	0.169	0.518	0.0192693	0.00219367	0.211923	Q54PL7	100	Q54PL7	32.7	Q54PL7	16.9
Q54V68	0.449	0.169	0.377	0.0683239	0.00292282	0.106986	Q54V68	100.7	Q54V68	45.2	Q54V68	17
Q54VT4	0.264	0.169	0.64	0.0111397	0.00181024	0.310201	Q54VT4	100	Q54VT4	26.4	Q54VT4	16.9
Q54W87	0.588	0.169	0.287	0.205786	0.0117929	0.17178	Q54W87	101.3	Q54W87	59.6	Q54W87	17.1
Q54ZN9	0.63	0.169	0.268	0.290153	0.00219203	0.043755	Q54ZN9	102.1	Q54ZN9	64.3	Q54ZN9	17.3
Q550I3	0.504	0.169	0.335	0.0174324	0.0002877	0.0213853	Q550I3	100	Q550I3	50.4	Q550I3	16.9
Q557B3	0.224	0.169	0.756	0.00185102	0.00038935	0.262396	Q557B3	100	Q557B3	22.4	Q557B3	16.9
Q55DI4	0.292	0.169	0.579	0.00475866	0.00059962	0.142822	Q55DI4	99.8	Q55DI4	29.2	Q55DI4	16.9
Q55ED4	0.333	0.169	0.508	0.0436102	0.00378004	0.187792	Q55ED4	99.4	Q55ED4	33.1	Q55ED4	16.8
Q55GD6	0.241	0.169	0.701	0.00042037	8.8953e-05	0.0887141	Q55GD6	104	Q55GD6	25.1	Q55GD6	17.6
Q5V9F0	0.187	0.169	0.9	1.2359e-05	2.8847e-06	0.0893841	Q5V9F0	100	Q5V9F0	18.7	Q5V9F0	16.9
Q86KU7	0.539	0.169	0.314	0.161714	0.00687146	0.129227	Q86KU7	100	Q86KU7	53.9	Q86KU7	16.9
B0G111	0.335	0.168	0.501	0.00633275	0.00056918	0.0973887	B0G111	100.3	B0G111	33.7	B0G111	16.9
P36411	0.542	0.168	0.309	0.0124831	0.00012765	0.00835868	P36411	100	P36411	54.2	P36411	16.8
Q54CD1	0.559	0.168	0.301	0.137874	0.00510923	0.111924	Q54CD1	98.7	Q54CD1	55.2	Q54CD1	16.6
Q54DP8	0.243	0.168	0.692	0.00752207	0.00138077	0.336916	Q54DP8	100	Q54DP8	24.3	Q54DP8	16.8
Q54GG4	0.282	0.168	0.596	0.0232968	0.00427788	0.414891	Q54GG4	100	Q54GG4	28.2	Q54GG4	16.8
Q54JE2	0.399	0.168	0.422	0.0327538	0.00143556	0.0878162	Q54JE2	99.5	Q54JE2	39.7	Q54JE2	16.8
Q54JL9	0.561	0.168	0.3	0.096604	0.00082409	0.0312428	Q54JL9	98.7	Q54JL9	55.3	Q54JL9	16.6
Q54KF3	0.403	0.168	0.416	0.0775557	0.0120042	0.400153	Q54KF3	100	Q54KF3	40.3	Q54KF3	16.8
Q54QK3	0.334	0.168	0.502	0.0196653	0.00279995	0.288557	Q54QK3	104.9	Q54QK3	35.1	Q54QK3	17.6
Q54SB7	0.412	0.168	0.408	0.0282374	0.00152763	0.101404	Q54SB7	102	Q54SB7	42	Q54SB7	17.1
Q54X10	0.608	0.168	0.276	0.188941	0.00618554	0.10862	Q54X10	98.5	Q54X10	59.9	Q54X10	16.5
Q54XT8	0.244	0.168	0.691	0.0112551	0.00242103	0.469346	Q54XT8	100	Q54XT8	24.4	Q54XT8	16.8
Q54XX7	0.71	0.168	0.237	0.227004	0.0004056	0.0121615	Q54XX7	102.9	Q54XX7	73.1	Q54XX7	17.3
Q551G5	0.583	0.168	0.289	0.187687	0.00622607	0.109454	Q551G5	100	Q551G5	58.3	Q551G5	16.8
Q556N4	0.321	0.168	0.524	0.00642247	0.00068136	0.124375	Q556N4	102.5	Q556N4	32.9	Q556N4	17.3
[truncated: 4,895 more rows]

## Sheet: Table S3
Table S3. Proteomics discovery core mitochondrial proteins. D. discoideum mitochondrial ETC, OXPHOS, and TCA cycle proteins used for enrichment normalization. Information retrieved from uniprot.org.
Dicty Uniprot ID	Protein names	Gene names	Cross-reference (dictyBase)	Gene ontology (biological process)	Gene ontology (cellular component)	Gene ontology (molecular function)	RER
Q54JB3	Probable protoheme IX farnesyltransferase, mitochondrial (EC 2.5.1.-) (Heme O synthase)	cox10 DDB_G0288169	DDB_G0288169	cellular respiration [GO:0045333]; heme A biosynthetic process [GO:0006784]; heme biosynthetic process [GO:0006783]; heme O biosynthetic process [GO:0048034]	integral component of membrane [GO:0016021]; mitochondrial membrane [GO:0031966]; mitochondrion [GO:0005739]	farnesyltranstransferase activity [GO:0004311]; protoheme IX farnesyltransferase activity [GO:0008495]	0.288
Q54ID0	Cytochrome c oxidase copper chaperone	cox17 DDB_G0288831	DDB_G0288831	mitochondrial cytochrome c oxidase assembly [GO:0033617]	mitochondrial intermembrane space [GO:0005758]	copper chaperone activity [GO:0016531]	0.472
Q37313	NADH-ubiquinone oxidoreductase chain 1 (EC 7.1.1.2) (NADH dehydrogenase subunit 1)	nad1 DDB_G0294018	DDB_G0294018	aerobic respiration [GO:0009060]	integral component of membrane [GO:0016021]; mitochondrial respiratory chain complex I [GO:0005747]	NADH dehydrogenase (ubiquinone) activity [GO:0008137]	0.54
Q37311	Cytochrome b (Complex III subunit 3) (Complex III subunit III) (Cytochrome b-c1 complex subunit 3) (Ubiquinol-cytochrome-c reductase complex cytochrome b subunit)	cytB cob mtcyb DDB_G0294078	DDB_G0294078	respiratory electron transport chain [GO:0022904]	integral component of membrane [GO:0016021]; mitochondrial inner membrane [GO:0005743]; respiratory chain complex III [GO:0045275]	metal ion binding [GO:0046872]; ubiquinol-cytochrome-c reductase activity [GO:0008121]	0.569
Q34313	NADH-ubiquinone oxidoreductase chain 5 (EC 7.1.1.2) (NADH dehydrogenase subunit 5)	nad5 DDB_G0294026	DDB_G0294026	ATP synthesis coupled electron transport [GO:0042773]; electron transport coupled proton transport [GO:0015990]	integral component of membrane [GO:0016021]; mitochondrial respiratory chain complex I [GO:0005747]	NADH dehydrogenase (ubiquinone) activity [GO:0008137]; NADH dehydrogenase activity [GO:0003954]	0.667
Q54NR3	NADH dehydrogenase [ubiquinone] 1 beta subcomplex subunit 9	ndufb9 DDB_G0285021	DDB_G0285021	mitochondrial electron transport, NADH to ubiquinone [GO:0006120]	mitochondrial respiratory chain complex I [GO:0005747]		0.728
Q75JR2	Isocitrate dehydrogenase [NADP], mitochondrial (EC 1.1.1.42) (IDH 2) (IDP 2) (NADP(+)-specific ICDH 2) (NADP-isocitrate dehydrogenase 2) (Oxalosuccinate decarboxylase 2)	idhM DDB_G0272210	DDB_G0272210	2-oxoglutarate metabolic process [GO:0006103]; glyoxylate cycle [GO:0006097]; isocitrate metabolic process [GO:0006102]; NADP metabolic process [GO:0006739]; tricarboxylic acid cycle [GO:0006099]	mitochondrion [GO:0005739]	isocitrate dehydrogenase (NADP+) activity [GO:0004450]; magnesium ion binding [GO:0000287]; NAD binding [GO:0051287]	0.744
O76740	Cytochrome c oxidase assembly protein	coxA DDB0214997	DDB_G0281549	heme A biosynthetic process [GO:0006784]	integral component of membrane [GO:0016021]; mitochondrial inner membrane [GO:0005743]	oxidoreductase activity, acting on NAD(P)H, heme protein as acceptor [GO:0016653]; oxidoreductase activity, acting on the CH-CH group of donors [GO:0016627]	0.767
Q869S7	Succinate--CoA ligase [GDP-forming] subunit beta, mitochondrial (EC 6.2.1.4) (GTP-specific succinyl-CoA synthetase subunit beta) (G-SCS) (GTPSCS) (Succinyl-CoA synthetase beta-G chain) (SCS-betaG)	scsB suclg2 DDB_G0274449	DDB_G0274449	succinyl-CoA metabolic process [GO:0006104]; tricarboxylic acid cycle [GO:0006099]	mitochondrion [GO:0005739]; succinate-CoA ligase complex [GO:0042709]	ATP binding [GO:0005524]; GTP binding [GO:0005525]; magnesium ion binding [GO:0000287]; succinate-CoA ligase (ADP-forming) activity [GO:0004775]; succinate-CoA ligase (GDP-forming) activity [GO:0004776]	0.799
Q54P95	Probable cytochrome c oxidase subunit 6B	DDB_G0284693	DDB_G0284693	oxidative phosphorylation [GO:0006119]	mitochondrial inner membrane [GO:0005743]; mitochondrion [GO:0005739]; respiratory chain complex IV [GO:0045277]		0.805
Q54F10	NADH dehydrogenase [ubiquinone] flavoprotein 2, mitochondrial (EC 7.1.1.2)	ndufv2 DDB_G0291173	DDB_G0291173	mitochondrial electron transport, NADH to ubiquinone [GO:0006120]	mitochondrial respiratory chain complex I [GO:0005747]	2 iron, 2 sulfur cluster binding [GO:0051537]; metal ion binding [GO:0046872]; NADH dehydrogenase (ubiquinone) activity [GO:0008137]	0.817
Q55AI5	Succinate--CoA ligase [ADP-forming] subunit beta, mitochondrial (EC 6.2.1.5) (ATP-specific succinyl-CoA synthetase subunit beta) (A-SCS) (Succinyl-CoA synthetase beta-A chain) (SCS-betaA)	scsC sucla2 DDB_G0271842	DDB_G0271842	succinyl-CoA metabolic process [GO:0006104]; tricarboxylic acid cycle [GO:0006099]	mitochondrion [GO:0005739]; succinate-CoA ligase complex [GO:0042709]	ATP binding [GO:0005524]; magnesium ion binding [GO:0000287]; succinate-CoA ligase (ADP-forming) activity [GO:0004775]; succinate-CoA ligase (GDP-forming) activity [GO:0004776]	0.854
Q34312	NADH-ubiquinone oxidoreductase 75 kDa subunit (EC 7.1.1.2) (Complex I-75kD) (CI-75kD)	nad11 ndufs1 DDB_G0294052	DDB_G0294052	ATP synthesis coupled electron transport [GO:0042773]	mitochondrial inner membrane [GO:0005743]; respirasome [GO:0070469]	2 iron, 2 sulfur cluster binding [GO:0051537]; 4 iron, 4 sulfur cluster binding [GO:0051539]; metal ion binding [GO:0046872]; NADH dehydrogenase (ubiquinone) activity [GO:0008137]	0.86
Q37312	NADH-ubiquinone oxidoreductase chain 3 (EC 7.1.1.2) (NADH dehydrogenase subunit 3)	nad3 DDB_G0294022	DDB_G0294022		integral component of membrane [GO:0016021]; mitochondrial membrane [GO:0031966]; respirasome [GO:0070469]	NADH dehydrogenase (ubiquinone) activity [GO:0008137]	0.861
Q23883	NADH-ubiquinone oxidoreductase 49 kDa subunit (EC 7.1.1.2) (NADH dehydrogenase subunit 7)	nad7 ndufs2 DDB_G0294030	DDB_G0294030	mitochondrial electron transport, NADH to ubiquinone [GO:0006120]	mitochondrial respiratory chain complex I [GO:0005747]	NAD binding [GO:0051287]; NADH dehydrogenase (ubiquinone) activity [GO:0008137]; quinone binding [GO:0048038]	0.883
Q54I90	NADH dehydrogenase [ubiquinone] flavoprotein 1, mitochondrial (EC 7.1.1.2) (Complex I-51kD) (CI-51kD) (NADH-ubiquinone oxidoreductase 51 kDa subunit)	ndufv1 qinA rcdG veg107 DDB_G0288875	DDB_G0288875	mitochondrial electron transport, NADH to ubiquinone [GO:0006120]	mitochondrial membrane [GO:0031966]; mitochondrial respiratory chain complex I [GO:0005747]; mitochondrion [GO:0005739]	4 iron, 4 sulfur cluster binding [GO:0051539]; FMN binding [GO:0010181]; metal ion binding [GO:0046872]; NAD binding [GO:0051287]; NADH dehydrogenase (ubiquinone) activity [GO:0008137]	0.887
Q54VG0	Probable 2-oxoglutarate dehydrogenase E1 component DHKTD1 homolog, mitochondrial (EC 1.2.4.2) (Oxoglutarate dehydrogenase A)	odhA DDB_G0280353	DDB_G0280353	glycolytic process [GO:0006096]; tricarboxylic acid cycle [GO:0006099]	mitochondrion [GO:0005739]	oxoglutarate dehydrogenase (succinyl-transferring) activity [GO:0004591]; thiamine pyrophosphate binding [GO:0030976]	0.905
Q54V61	NADH dehydrogenase [ubiquinone] 1 beta subcomplex subunit 7	ndufb7 DDB_G0280595	DDB_G0280595		mitochondrial intermembrane space [GO:0005758]; mitochondrial respiratory chain complex I [GO:0005747]	NADH dehydrogenase (ubiquinone) activity [GO:0008137]	0.906
Q54QR8	Probable cytochrome b-c1 complex subunit 9 (Ubiquinol-cytochrome c reductase complex subunit 9)	DDB_G0283669	DDB_G0283669	aerobic respiration [GO:0009060]; mitochondrial electron transport, ubiquinol to cytochrome c [GO:0006122]	integral component of membrane [GO:0016021]; mitochondrial respiratory chain complex III [GO:0005750]		0.911
Q54BR2	Uncharacterized protein	DDB_G0293480	DDB_G0293480	mitochondrial respiratory chain complex I assembly [GO:0032981]	mitochondrial respiratory chain complex I [GO:0005747]		1.001
P36967	Succinate--CoA ligase [ADP/GDP-forming] subunit alpha, mitochondrial (EC 6.2.1.4) (EC 6.2.1.5) (Succinyl-CoA synthetase subunit alpha) (SCS-alpha) (p36)	scsA DDB_G0289325	DDB_G0289325	succinyl-CoA metabolic process [GO:0006104]; tricarboxylic acid cycle [GO:0006099]	membrane [GO:0016020]; mitochondrion [GO:0005739]; succinate-CoA ligase complex (ADP-forming) [GO:0009361]	nucleotide binding [GO:0000166]; succinate-CoA ligase (ADP-forming) activity [GO:0004775]; succinate-CoA ligase (GDP-forming) activity [GO:0004776]	1.021
Q54D07	Cytochrome c1, heme protein, mitochondrial (Cytochrome c-1) (EC 7.1.1.8) (Complex III subunit 4) (Complex III subunit IV) (Cytochrome b-c1 complex subunit 4)	cyc1 DDB_G0292594	DDB_G0292594	mitochondrial electron transport, ubiquinol to cytochrome c [GO:0006122]	integral component of membrane [GO:0016021]; mitochondrial inner membrane [GO:0005743]; mitochondrial respiratory chain complex III [GO:0005750]	heme binding [GO:0020037]; metal ion binding [GO:0046872]; ubiquinol-cytochrome-c reductase activity [GO:0008121]	1.032
Q55GR1	zf-CHCC domain-containing protein	DDB0189366	DDB_G0267552	mitochondrial electron transport, NADH to ubiquinone [GO:0006120]	mitochondrial respiratory chain complex I [GO:0005747]		1.036
Q54JE4	2-oxoglutarate dehydrogenase, mitochondrial (EC 1.2.4.2) (2-oxoglutarate dehydrogenase complex component E1) (OGDC-E1) (Alpha-ketoglutarate dehydrogenase)	ogdh DDB_G0288127	DDB_G0288127	glycolytic process [GO:0006096]; tricarboxylic acid cycle [GO:0006099]	mitochondrial oxoglutarate dehydrogenase complex [GO:0009353]; mitochondrion [GO:0005739]; oxoglutarate dehydrogenase complex [GO:0045252]	oxoglutarate dehydrogenase (succinyl-transferring) activity [GO:0004591]; thiamine pyrophosphate binding [GO:0030976]	1.047
Q55BI2	Isocitrate dehydrogenase [NAD] regulatory subunit A, mitochondrial (EC 1.1.1.41)	idhA DDB_G0271344	DDB_G0271344	isocitrate metabolic process [GO:0006102]; tricarboxylic acid cycle [GO:0006099]	mitochondrion [GO:0005739]	isocitrate dehydrogenase (NAD+) activity [GO:0004449]; magnesium ion binding [GO:0000287]; NAD binding [GO:0051287]	1.051
Q869Y7	Dihydrolipoyllysine-residue succinyltransferase component of 2-oxoglutarate dehydrogenase complex, mitochondrial (EC 2.3.1.61) (2-oxoglutarate dehydrogenase complex component E2) (OGDC-E2) (Dihydrolipoamide succinyltransferase component of 2-oxoglutarate dehydrogenase complex)	odhB dlst DDB_G0275029	DDB_G0275029	L-lysine catabolic process to acetyl-CoA via saccharopine [GO:0033512]; tricarboxylic acid cycle [GO:0006099]	mitochondrion [GO:0005739]; oxoglutarate dehydrogenase complex [GO:0045252]	dihydrolipoyllysine-residue succinyltransferase activity [GO:0004149]	1.078
Q75JK6	ATP synthase subunit epsilon, mitochondrial (ATPase subunit epsilon) (ATP synthase F1 subunit epsilon)	atp5f1e atp15 atp5e DDB_G0276241	DDB_G0276241		mitochondrial inner membrane [GO:0005743]; mitochondrial proton-transporting ATP synthase complex, catalytic sector F(1) [GO:0000275]	hydrolase activity [GO:0016787]; proton-transporting ATP synthase activity, rotational mechanism [GO:0046933]	1.097
Q8T1V6	NADH dehydrogenase [ubiquinone] iron-sulfur protein 4, mitochondrial	ndufs4 DDB_G0295657	DDB_G0295657		mitochondrial respiratory chain complex I [GO:0005747]; mitochondrion [GO:0005739]	NADH dehydrogenase (ubiquinone) activity [GO:0008137]	1.104
Q55F42	ATP synthase subunit delta, mitochondrial (ATP synthase F1 subunit delta) (F-ATPase delta subunit)	atp5f1d atp16 atp5D DDB_G0269038	DDB_G0269038	ATP synthesis coupled proton transport [GO:0015986]	mitochondrial proton-transporting ATP synthase, central stalk [GO:0005756]; mitochondrial proton-transporting ATP synthase complex, catalytic sector F(1) [GO:0000275]	hydrolase activity [GO:0016787]; proton-transporting ATP synthase activity, rotational mechanism [GO:0046933]	1.115
P36413	Dihydrolipoyllysine-residue acetyltransferase component of pyruvate dehydrogenase complex, mitochondrial (EC 2.3.1.12) (Dihydrolipoamide acetyltransferase component of pyruvate dehydrogenase complex) (Pyruvate dehydrogenase complex component E2) (PDC-E2) (PDCE2)	pdhC dlaA DDB_G0277847	DDB_G0277847	acetyl-CoA biosynthetic process from pyruvate [GO:0006086]; glycolytic process [GO:0006096]	mitochondrial pyruvate dehydrogenase complex [GO:0005967]	dihydrolipoyllysine-residue acetyltransferase activity [GO:0004742]	1.119
Q37314	NADH-ubiquinone oxidoreductase chain 6 (EC 7.1.1.2) (NADH dehydrogenase subunit 6)	nad6 DDB_G0294028	DDB_G0294028		integral component of membrane [GO:0016021]; mitochondrial respiratory chain complex I [GO:0005747]	NADH dehydrogenase (ubiquinone) activity [GO:0008137]	1.122
Q54NW9	Cytochrome b-c1 complex subunit Rieske, mitochondrial (EC 7.1.1.8) (Fragment)	ucr DDB_G0284947	DDB_G0284947	mitochondrial electron transport, ubiquinol to cytochrome c [GO:0006122]	integral component of membrane [GO:0016021]; mitochondrial respiratory chain complex III [GO:0005750]	2 iron, 2 sulfur cluster binding [GO:0051537]; metal ion binding [GO:0046872]; oxidoreductase activity [GO:0016491]; ubiquinol-cytochrome-c reductase activity [GO:0008121]	1.122
Q55CC2	Succinate dehydrogenase [ubiquinone] iron-sulfur subunit, mitochondrial (EC 1.3.5.1) (Iron-sulfur subunit of complex II) (Ip)	sdhB DDB_G0270120	DDB_G0270120	aerobic respiration [GO:0009060]; respiratory electron transport chain [GO:0022904]; tricarboxylic acid cycle [GO:0006099]	mitochondrial inner membrane [GO:0005743]; mitochondrial membrane [GO:0031966]; mitochondrial respiratory chain complex II, succinate dehydrogenase complex (ubiquinone) [GO:0005749]	2 iron, 2 sulfur cluster binding [GO:0051537]; 3 iron, 4 sulfur cluster binding [GO:0051538]; 4 iron, 4 sulfur cluster binding [GO:0051539]; electron transfer activity [GO:0009055]; metal ion binding [GO:0046872]; succinate dehydrogenase (ubiquinone) activity [GO:0008177]; ubiquinone binding [GO:0048039]	1.156
Q86HX0	Pyruvate dehydrogenase E1 component subunit beta, mitochondrial (PDHE1-B) (EC 1.2.4.1)	pdhB DDB_G0276417	DDB_G0276417	acetyl-CoA biosynthetic process from pyruvate [GO:0006086]; glycolytic process [GO:0006096]	mitochondrial pyruvate dehydrogenase complex [GO:0005967]	pyruvate dehydrogenase (acetyl-transferring) activity [GO:0004739]	1.177
Q54NI6	NADH dehydrogenase [ubiquinone] iron-sulfur protein 7, mitochondrial	ndufs7 DDB_G0285239	DDB_G0285239	aerobic respiration [GO:0009060]; electron transport coupled proton transport [GO:0015990]; mitochondrial respiratory chain complex I assembly [GO:0032981]	mitochondrial respiratory chain complex I [GO:0005747]; mitochondrion [GO:0005739]	4 iron, 4 sulfur cluster binding [GO:0051539]; metal ion binding [GO:0046872]; NADH dehydrogenase (ubiquinone) activity [GO:0008137]; quinone binding [GO:0048038]	1.18
O21047	NADH-ubiquinone oxidoreductase chain 4 (EC 7.1.1.2) (NADH dehydrogenase subunit 4)	nad4 DDB_G0294048	DDB_G0294048	aerobic respiration [GO:0009060]; ATP synthesis coupled electron transport [GO:0042773]; electron transport coupled proton transport [GO:0015990]	integral component of membrane [GO:0016021]; mitochondrial membrane [GO:0031966]; respirasome [GO:0070469]	NADH dehydrogenase (ubiquinone) activity [GO:0008137]; ubiquinone binding [GO:0048039]	1.184
Q86K57	Uncharacterized protein	DDB0169117	DDB_G0277231	aerobic respiration [GO:0009060]; mitochondrial electron transport, NADH to ubiquinone [GO:0006120]; mitochondrial respiratory chain complex I assembly [GO:0032981]	mitochondrial respiratory chain complex I [GO:0005747]	4 iron, 4 sulfur cluster binding [GO:0051539]; NADH dehydrogenase (ubiquinone) activity [GO:0008137]	1.26
Q54HM6	Cytochrome c oxidase assembly protein COX11, mitochondrial	cox11 DDB_G0289353	DDB_G0289353	aerobic respiration [GO:0009060]; protein-containing complex assembly [GO:0065003]	integral component of membrane [GO:0016021]; intrinsic component of mitochondrial inner membrane [GO:0031304]; mitochondrion [GO:0005739]	copper ion binding [GO:0005507]	1.263
Q54M82	Probable cytochrome b-c1 complex subunit 7 (Ubiquinol-cytochrome c reductase complex subunit 7)	DDB_G0286171	DDB_G0286171	aerobic respiration [GO:0009060]; mitochondrial electron transport, ubiquinol to cytochrome c [GO:0006122]	mitochondrial respiratory chain complex III [GO:0005750]		1.317
P22237	NADH-ubiquinone oxidoreductase subunit 9 (EC 7.1.1.2)	nad9 ndufs3 noxA DDB_G0294032	DDB_G0294032		mitochondrial respiratory chain complex I [GO:0005747]	NADH dehydrogenase (ubiquinone) activity [GO:0008137]	1.354
O21048	NADH-ubiquinone oxidoreductase chain 2 (EC 7.1.1.2) (NADH dehydrogenase subunit 2)	nad2 DDB_G0294020	DDB_G0294020		integral component of membrane [GO:0016021]; mitochondrial inner membrane [GO:0005743]; respirasome [GO:0070469]	NADH dehydrogenase (ubiquinone) activity [GO:0008137]	1.367
Q8T2T5	Succinate dehydrogenase cytochrome b560 subunit, mitochondrial	sdhC DDB_G0275115	DDB_G0275115	mitochondrial electron transport, succinate to ubiquinone [GO:0006121]; tricarboxylic acid cycle [GO:0006099]	integral component of membrane [GO:0016021]; mitochondrial inner membrane [GO:0005743]; mitochondrial respiratory chain complex II, succinate dehydrogenase complex (ubiquinone) [GO:0005749]	heme binding [GO:0020037]; metal ion binding [GO:0046872]; succinate dehydrogenase activity [GO:0000104]	1.381
Q1ZXP3	Probable cytochrome b-c1 complex subunit 6 (Ubiquinol-cytochrome c reductase complex subunit 6)	uqcrh DDB_G0271774	DDB_G0271774	aerobic respiration [GO:0009060]; mitochondrial electron transport, ubiquinol to cytochrome c [GO:0006122]	mitochondrial respiratory chain complex III [GO:0005750]	ubiquinol-cytochrome-c reductase activity [GO:0008121]	1.391
Q54V76	Probable cytochrome b-c1 complex subunit 8 (Ubiquinol-cytochrome c reductase complex subunit 8)	DDB_G0280569	DDB_G0280569	mitochondrial electron transport, ubiquinol to cytochrome c [GO:0006122]	integral component of membrane [GO:0016021]; mitochondrial respiratory chain complex III [GO:0005750]	ubiquinol-cytochrome-c reductase activity [GO:0008121]	1.576
O21049	Cytochrome c oxidase subunit 3 (EC 7.1.1.9) (Cytochrome c oxidase polypeptide III)	cox3 DDB_G0294092	DDB_G0294092	aerobic respiration [GO:0009060]; mitochondrial electron transport, cytochrome c to oxygen [GO:0006123]	integral component of membrane [GO:0016021]; mitochondrial inner membrane [GO:0005743]; mitochondrion [GO:0005739]	cytochrome-c oxidase activity [GO:0004129]; electron transfer activity [GO:0009055]; oxidoreduction-driven active transmembrane transporter activity [GO:0015453]	1.633
O21042	Cytochrome c oxidase subunit 1+2 (EC 7.1.1.9) (Cytochrome c oxidase polypeptide I+II)	cox1/2 cox1 coxI Ddmco DDB_G0294088	DDB_G0294088	aerobic respiration [GO:0009060]; electron transport coupled proton transport [GO:0015990]; mitochondrial electron transport, cytochrome c to oxygen [GO:0006123]; respiratory electron transport chain [GO:0022904]	integral component of membrane [GO:0016021]; mitochondrial respiratory chain complex IV [GO:0005751]	copper ion binding [GO:0005507]; cytochrome-c oxidase activity [GO:0004129]; heme binding [GO:0020037]	1.753
Q54YN1	Succinate dehydrogenase [ubiquinone] cytochrome b small subunit	sdhD DDB0231386	DDB_G0278157	mitochondrial electron transport, succinate to ubiquinone [GO:0006121]; tricarboxylic acid cycle [GO:0006099]	integral component of membrane [GO:0016021]; mitochondrial envelope [GO:0005740]; mitochondrial respiratory chain complex II, succinate dehydrogenase complex (ubiquinone) [GO:0005749]	heme binding [GO:0020037]; ubiquinone binding [GO:0048039]	2.243

## Sheet: Table S4
Table S4. Proteomics discovery mitochondrial targeting sequence prediction. N-terminal sequence predictions retrieved from TargetP-2.0 for all samples quantified in the proteomic discovery experiment (n = 6892, columns A-C) and all proteins with an RER > 0.343 (n = 908, columns D-F). mTP: mitochondrial targeting peptide; SP: signal peptide; OTHER: neither mTP nor SP.
Entire proteome			Mitochondrial protein discovery
Dicty Uniprot ID	RER	Prediction	Uniprot ID	RER	Prediction
Q01501	2.865	OTHER	Q01501	2.865	OTHER
Q54YA6	2.627	OTHER	Q54YA6	2.627	OTHER
Q869N6	2.566	mTP	Q869N6	2.566	mTP
Q54UK2	2.252	OTHER	Q54UK2	2.252	OTHER
Q54YN1	2.243	mTP	Q54YN1	2.243	mTP
O97470	2.193	OTHER	O97470	2.193	OTHER
Q54SI3	2.193	OTHER	Q54SI3	2.193	OTHER
Q54RE9	2.184	OTHER	Q54RE9	2.184	OTHER
B0G168	2.022	OTHER	B0G168	2.022	OTHER
Q54BF6	1.876	OTHER	Q54BF6	1.876	OTHER
Q75K07	1.829	OTHER	Q75K07	1.829	OTHER
Q54TT7	1.808	OTHER	Q54TT7	1.808	OTHER
Q54P38	1.769	OTHER	Q54P38	1.769	OTHER
O21042	1.753	OTHER	O21042	1.753	OTHER
Q54JC2	1.745	OTHER	Q54JC2	1.745	OTHER
Q552L9	1.738	OTHER	Q552L9	1.738	OTHER
O21049	1.633	OTHER	O21049	1.633	OTHER
Q76P15	1.614	OTHER	Q76P15	1.614	OTHER
Q54QH7	1.597	mTP	Q54QH7	1.597	mTP
Q54RS2	1.591	OTHER	Q54RS2	1.591	OTHER
Q54V76	1.576	OTHER	Q54V76	1.576	OTHER
P30815	1.54	mTP	P30815	1.54	mTP
Q54N56	1.529	OTHER	Q54N56	1.529	OTHER
P26310	1.524	OTHER	P26310	1.524	OTHER
Q54B67	1.504	OTHER	Q54B67	1.504	OTHER
Q54H66	1.498	SP	Q54H66	1.498	SP
Q55CC8	1.496	OTHER	Q55CC8	1.496	OTHER
Q54G09	1.483	mTP	Q54G09	1.483	mTP
Q54JX6	1.48	OTHER	Q54JX6	1.48	OTHER
Q86L28	1.476	OTHER	Q86L28	1.476	OTHER
P20609	1.475	OTHER	P20609	1.475	OTHER
Q55E91	1.473	OTHER	Q55E91	1.473	OTHER
Q54QM2	1.468	mTP	Q54QM2	1.468	mTP
Q54QH6	1.462	mTP	Q54QH6	1.462	mTP
Q55CS9	1.461	mTP	Q55CS9	1.461	mTP
A9CLV7	1.447	OTHER	A9CLV7	1.447	OTHER
Q54PX1	1.439	OTHER	Q54PX1	1.439	OTHER
Q55AD7	1.439	OTHER	Q55AD7	1.439	OTHER
A9CLV8	1.438	SP	A9CLV8	1.438	SP
O21050	1.429	OTHER	O21050	1.429	OTHER
Q55FH5	1.401	OTHER	Q55FH5	1.401	OTHER
Q55G38	1.395	OTHER	Q55G38	1.395	OTHER
Q54RB9	1.391	mTP	Q54RB9	1.391	mTP
Q1ZXP3	1.391	OTHER	Q1ZXP3	1.391	OTHER
Q55BP9	1.388	OTHER	Q55BP9	1.388	OTHER
Q55GW4	1.382	OTHER	Q55GW4	1.382	OTHER
Q8T2T5	1.381	mTP	Q8T2T5	1.381	mTP
Q54C69	1.38	OTHER	Q54C69	1.38	OTHER
Q55C70	1.379	OTHER	Q55C70	1.379	OTHER
Q54DI4	1.377	OTHER	Q54DI4	1.377	OTHER
C7FZZ8	1.369	OTHER	C7FZZ8	1.369	OTHER
O21048	1.367	OTHER	O21048	1.367	OTHER
Q54YX7	1.358	OTHER	Q54YX7	1.358	OTHER
Q54XU9	1.356	OTHER	Q54XU9	1.356	OTHER
Q54VU6	1.355	OTHER	Q54VU6	1.355	OTHER
Q54P11	1.354	mTP	Q54P11	1.354	mTP
P22237	1.354	OTHER	P22237	1.354	OTHER
Q55GV8	1.351	OTHER	Q55GV8	1.351	OTHER
Q54UB7	1.345	mTP	Q54UB7	1.345	mTP
C7G004	1.342	OTHER	C7G004	1.342	OTHER
Q86K89	1.342	OTHER	Q86K89	1.342	OTHER
Q4W6B5	1.321	OTHER	Q4W6B5	1.321	OTHER
Q54M82	1.317	OTHER	Q54M82	1.317	OTHER
B0M0Q3	1.302	OTHER	B0M0Q3	1.302	OTHER
Q54MN5	1.301	OTHER	Q54MN5	1.301	OTHER
Q9U641	1.301	OTHER	Q9U641	1.301	OTHER
Q86KK8	1.296	SP	Q86KK8	1.296	SP
Q557F3	1.292	mTP	Q557F3	1.292	mTP
Q86AE2	1.29	mTP	Q86AE2	1.29	mTP
Q9XPJ9	1.285	OTHER	Q9XPJ9	1.285	OTHER
Q86JL1	1.282	mTP	Q86JL1	1.282	mTP
Q54VX4	1.28	OTHER	Q54VX4	1.28	OTHER
Q54LR4	1.267	mTP	Q54LR4	1.267	mTP
Q552A1	1.267	OTHER	Q552A1	1.267	OTHER
Q54TK2	1.264	mTP	Q54TK2	1.264	mTP
Q54L97	1.264	OTHER	Q54L97	1.264	OTHER
Q54HM6	1.263	OTHER	Q54HM6	1.263	OTHER
Q86K57	1.26	mTP	Q86K57	1.26	mTP
Q54U34	1.259	mTP	Q54U34	1.259	mTP
Q54RB6	1.253	OTHER	Q54RB6	1.253	OTHER
Q54TD4	1.249	OTHER	Q54TD4	1.249	OTHER
C7G062	1.246	OTHER	C7G062	1.246	OTHER
Q8MP23	1.245	OTHER	Q8MP23	1.245	OTHER
Q559Z4	1.243	OTHER	Q559Z4	1.243	OTHER
Q54WP1	1.241	mTP	Q54WP1	1.241	mTP
Q54L27	1.237	OTHER	Q54L27	1.237	OTHER
Q54E48	1.233	mTP	Q54E48	1.233	mTP
Q54D02	1.228	OTHER	Q54D02	1.228	OTHER
Q54QN4	1.223	mTP	Q54QN4	1.223	mTP
Q54VK2	1.222	mTP	Q54VK2	1.222	mTP
Q23885	1.222	OTHER	Q23885	1.222	OTHER
Q54N01	1.217	OTHER	Q54N01	1.217	OTHER
Q86JB5	1.216	OTHER	Q86JB5	1.216	OTHER
Q55CK0	1.215	mTP	Q55CK0	1.215	mTP
Q54XR6	1.215	OTHER	Q54XR6	1.215	OTHER
Q55F64	1.215	OTHER	Q55F64	1.215	OTHER
Q54LT0	1.212	mTP	Q54LT0	1.212	mTP
Q55G08	1.21	OTHER	Q55G08	1.21	OTHER
Q23889	1.206	OTHER	Q23889	1.206	OTHER
P29505	1.205	OTHER	P29505	1.205	OTHER
Q552Y0	1.205	OTHER	Q552Y0	1.205	OTHER
Q54K54	1.204	SP	Q54K54	1.204	SP
Q54FA9	1.203	OTHER	Q54FA9	1.203	OTHER
Q55BS6	1.203	OTHER	Q55BS6	1.203	OTHER
Q54ZW2	1.2	OTHER	Q54ZW2	1.2	OTHER
Q54QV8	1.196	mTP	Q54QV8	1.196	mTP
Q54D88	1.19	OTHER	Q54D88	1.19	OTHER
Q551I4	1.19	OTHER	Q551I4	1.19	OTHER
Q54G88	1.187	mTP	Q54G88	1.187	mTP
Q54RA8	1.185	mTP	Q54RA8	1.185	mTP
Q54JS1	1.184	mTP	Q54JS1	1.184	mTP
O21047	1.184	OTHER	O21047	1.184	OTHER
Q54E30	1.183	OTHER	Q54E30	1.183	OTHER
Q54Q31	1.183	OTHER	Q54Q31	1.183	OTHER
Q54NI6	1.18	OTHER	Q54NI6	1.18	OTHER
Q54CB8	1.179	mTP	Q54CB8	1.179	mTP
Q86HX0	1.177	mTP	Q86HX0	1.177	mTP
B0G0Z7	1.177	SP	B0G0Z7	1.177	SP
Q55EC2	1.177	OTHER	Q55EC2	1.177	OTHER
Q75JT7	1.176	OTHER	Q75JT7	1.176	OTHER
Q54CA5	1.174	OTHER	Q54CA5	1.174	OTHER
B0G0Y7	1.172	mTP	B0G0Y7	1.172	mTP
Q75JN4	1.171	mTP	Q75JN4	1.171	mTP
Q54XM1	1.171	OTHER	Q54XM1	1.171	OTHER
B0G159	1.168	OTHER	B0G159	1.168	OTHER
Q54QC2	1.162	OTHER	Q54QC2	1.162	OTHER
Q86AH1	1.158	mTP	Q86AH1	1.158	mTP
Q54DT8	1.158	OTHER	Q54DT8	1.158	OTHER
Q86I17	1.158	OTHER	Q86I17	1.158	OTHER
Q55CC2	1.156	mTP	Q55CC2	1.156	mTP
Q54DU1	1.154	OTHER	Q54DU1	1.154	OTHER
Q54KN1	1.152	OTHER	Q54KN1	1.152	OTHER
Q1ZXD4	1.151	OTHER	Q1ZXD4	1.151	OTHER
Q54UV0	1.148	mTP	Q54UV0	1.148	mTP
Q54D99	1.146	OTHER	Q54D99	1.146	OTHER
Q86I71	1.146	OTHER	Q86I71	1.146	OTHER
Q54XH7	1.145	mTP	Q54XH7	1.145	mTP
Q86AD5	1.145	OTHER	Q86AD5	1.145	OTHER
Q55D79	1.144	mTP	Q55D79	1.144	mTP
Q54RP1	1.143	OTHER	Q54RP1	1.143	OTHER
Q54DK1	1.142	SP	Q54DK1	1.142	SP
P90520	1.142	OTHER	P90520	1.142	OTHER
Q54PV9	1.142	OTHER	Q54PV9	1.142	OTHER
Q7KWR8	1.141	OTHER	Q7KWR8	1.141	OTHER
Q55GD7	1.139	OTHER	Q55GD7	1.139	OTHER
Q75JS8	1.139	OTHER	Q75JS8	1.139	OTHER
Q54MV7	1.138	OTHER	Q54MV7	1.138	OTHER
Q54F93	1.135	mTP	Q54F93	1.135	mTP
Q54WN8	1.135	mTP	Q54WN8	1.135	mTP
Q54VB3	1.134	OTHER	Q54VB3	1.134	OTHER
Q86H83	1.133	mTP	Q86H83	1.133	mTP
Q55GJ5	1.133	OTHER	Q55GJ5	1.133	OTHER
Q55BF1	1.132	OTHER	Q55BF1	1.132	OTHER
Q54LM9	1.13	OTHER	Q54LM9	1.13	OTHER
Q54C70	1.128	mTP	Q54C70	1.128	mTP
Q8T866	1.127	mTP	Q8T866	1.127	mTP
Q37314	1.122	OTHER	Q37314	1.122	OTHER
Q54NW9	1.122	OTHER	Q54NW9	1.122	OTHER
Q54D27	1.12	OTHER	Q54D27	1.12	OTHER
Q553K8	1.12	OTHER	Q553K8	1.12	OTHER
P36413	1.119	mTP	P36413	1.119	mTP
Q54LH3	1.118	OTHER	Q54LH3	1.118	OTHER
Q55D19	1.118	OTHER	Q55D19	1.118	OTHER
Q55FB3	1.117	OTHER	Q55FB3	1.117	OTHER
Q55F42	1.115	mTP	Q55F42	1.115	mTP
Q86AV5	1.115	OTHER	Q86AV5	1.115	OTHER
Q54HG8	1.114	mTP	Q54HG8	1.114	mTP
Q23891	1.11	OTHER	Q23891	1.11	OTHER
Q54P00	1.108	OTHER	Q54P00	1.108	OTHER
Q54QC1	1.108	OTHER	Q54QC1	1.108	OTHER
Q54ZX5	1.108	OTHER	Q54ZX5	1.108	OTHER
Q86K64	1.107	OTHER	Q86K64	1.107	OTHER
Q553P4	1.106	OTHER	Q553P4	1.106	OTHER
Q8T1V6	1.104	mTP	Q8T1V6	1.104	mTP
Q54W21	1.102	OTHER	Q54W21	1.102	OTHER
Q55EE3	1.101	OTHER	Q55EE3	1.101	OTHER
Q553N4	1.1	mTP	Q553N4	1.1	mTP
Q54VJ9	1.099	OTHER	Q54VJ9	1.099	OTHER
Q54TR3	1.098	OTHER	Q54TR3	1.098	OTHER
Q54WP3	1.097	mTP	Q54WP3	1.097	mTP
Q75JK6	1.097	OTHER	Q75JK6	1.097	OTHER
Q552S2	1.096	OTHER	Q552S2	1.096	OTHER
Q54FH4	1.094	OTHER	Q54FH4	1.094	OTHER
Q54XN1	1.094	OTHER	Q54XN1	1.094	OTHER
Q557J7	1.091	OTHER	Q557J7	1.091	OTHER
Q54CG9	1.086	OTHER	Q54CG9	1.086	OTHER
Q54JK6	1.085	mTP	Q54JK6	1.085	mTP
Q54F09	1.082	mTP	Q54F09	1.082	mTP
Q54JZ8	1.082	OTHER	Q54JZ8	1.082	OTHER
Q54KH9	1.082	OTHER	Q54KH9	1.082	OTHER
Q54EN1	1.08	mTP	Q54EN1	1.08	mTP
Q9U3X4	1.08	mTP	Q9U3X4	1.08	mTP
O21039	1.079	OTHER	O21039	1.079	OTHER
Q869Y7	1.078	mTP	Q869Y7	1.078	mTP
Q54TR7	1.076	mTP	Q54TR7	1.076	mTP
Q556G9	1.068	OTHER	Q556G9	1.068	OTHER
Q55FN7	1.067	mTP	Q55FN7	1.067	mTP
Q55DS3	1.066	OTHER	Q55DS3	1.066	OTHER
Q54CZ9	1.063	OTHER	Q54CZ9	1.063	OTHER
Q54DQ8	1.062	mTP	Q54DQ8	1.062	mTP
Q55C23	1.062	OTHER	Q55C23	1.062	OTHER
Q9TGM3	1.061	OTHER	Q9TGM3	1.061	OTHER
Q55DD8	1.059	mTP	Q55DD8	1.059	mTP
Q556W7	1.058	OTHER	Q556W7	1.058	OTHER
Q55GE2	1.058	OTHER	Q55GE2	1.058	OTHER
Q550W4	1.056	OTHER	Q550W4	1.056	OTHER
Q54NQ9	1.055	OTHER	Q54NQ9	1.055	OTHER
Q54B21	1.053	OTHER	Q54B21	1.053	OTHER
Q55BI2	1.051	mTP	Q55BI2	1.051	mTP
Q54IQ2	1.051	OTHER	Q54IQ2	1.051	OTHER
Q55G45	1.049	OTHER	Q55G45	1.049	OTHER
O21037	1.048	OTHER	O21037	1.048	OTHER
Q54JE4	1.047	mTP	Q54JE4	1.047	mTP
Q54F15	1.047	OTHER	Q54F15	1.047	OTHER
Q54N53	1.046	OTHER	Q54N53	1.046	OTHER
Q54K70	1.045	SP	Q54K70	1.045	SP
Q54WD1	1.045	OTHER	Q54WD1	1.045	OTHER
Q553S7	1.042	mTP	Q553S7	1.042	mTP
Q55GU3	1.042	mTP	Q55GU3	1.042	mTP
Q54QA4	1.042	OTHER	Q54QA4	1.042	OTHER
B0G143	1.041	SP	B0G143	1.041	SP
Q54CY8	1.037	mTP	Q54CY8	1.037	mTP
O21032	1.037	OTHER	O21032	1.037	OTHER
Q55GR1	1.036	mTP	Q55GR1	1.036	mTP
Q54XD0	1.034	OTHER	Q54XD0	1.034	OTHER
Q54I10	1.033	mTP	Q54I10	1.033	mTP
Q54Z54	1.033	mTP	Q54Z54	1.033	mTP
Q9XPI8	1.033	OTHER	Q9XPI8	1.033	OTHER
Q54D07	1.032	mTP	Q54D07	1.032	mTP
Q54G54	1.03	OTHER	Q54G54	1.03	OTHER
Q557H6	1.03	OTHER	Q557H6	1.03	OTHER
Q9XPI7	1.03	OTHER	Q9XPI7	1.03	OTHER
Q54XM6	1.027	mTP	Q54XM6	1.027	mTP
Q54T96	1.027	OTHER	Q54T96	1.027	OTHER
Q54DF1	1.026	OTHER	Q54DF1	1.026	OTHER
P36967	1.021	mTP	P36967	1.021	mTP
Q1ZXB5	1.016	OTHER	Q1ZXB5	1.016	OTHER
Q55E94	1.015	mTP	Q55E94	1.015	mTP
Q23890	1.015	OTHER	Q23890	1.015	OTHER
Q54UU7	1.014	mTP	Q54UU7	1.014	mTP
Q86K67	1.014	mTP	Q86K67	1.014	mTP
Q54HU6	1.014	OTHER	Q54HU6	1.014	OTHER
O21036	1.013	mTP	O21036	1.013	mTP
Q54H56	1.013	OTHER	Q54H56	1.013	OTHER
Q54EW8	1.012	mTP	Q54EW8	1.012	mTP
Q54HY7	1.012	mTP	Q54HY7	1.012	mTP
Q54IW4	1.011	OTHER	Q54IW4	1.011	OTHER
Q54UP6	1.011	OTHER	Q54UP6	1.011	OTHER
Q54YV4	1.011	OTHER	Q54YV4	1.011	OTHER
Q54RS6	1.005	OTHER	Q54RS6	1.005	OTHER
Q54B92	1.004	OTHER	Q54B92	1.004	OTHER
Q54E00	1.002	OTHER	Q54E00	1.002	OTHER
Q54BM3	1.001	OTHER	Q54BM3	1.001	OTHER
Q54BR2	1.001	OTHER	Q54BR2	1.001	OTHER
Q54XU0	1.001	OTHER	Q54XU0	1.001	OTHER
Q55ED6	1.001	OTHER	Q55ED6	1.001	OTHER
Q54BW7	1	OTHER	Q54BW7	1	OTHER
Q54QK2	1	OTHER	Q54QK2	1	OTHER
Q8MYF0	1	OTHER	Q8MYF0	1	OTHER
Q54JB6	0.998	OTHER	Q54JB6	0.998	OTHER
Q54MS4	0.998	OTHER	Q54MS4	0.998	OTHER
Q54W11	0.997	OTHER	Q54W11	0.997	OTHER
Q9GRX6	0.996	mTP	Q9GRX6	0.996	mTP
Q54VK0	0.995	mTP	Q54VK0	0.995	mTP
Q23886	0.994	OTHER	Q23886	0.994	OTHER
Q54JD2	0.994	OTHER	Q54JD2	0.994	OTHER
Q54MZ4	0.993	OTHER	Q54MZ4	0.993	OTHER
Q555F1	0.993	OTHER	Q555F1	0.993	OTHER
Q8T131	0.992	mTP	Q8T131	0.992	mTP
Q54I61	0.992	OTHER	Q54I61	0.992	OTHER
Q54B62	0.986	mTP	Q54B62	0.986	mTP
Q55E10	0.986	OTHER	Q55E10	0.986	OTHER
Q55GS7	0.983	OTHER	Q55GS7	0.983	OTHER
Q55C27	0.981	OTHER	Q55C27	0.981	OTHER
Q75JB5	0.981	OTHER	Q75JB5	0.981	OTHER
Q55D72	0.98	mTP	Q55D72	0.98	mTP
Q54JD9	0.976	mTP	Q54JD9	0.976	mTP
Q553J7	0.976	OTHER	Q553J7	0.976	OTHER
Q54I30	0.974	OTHER	Q54I30	0.974	OTHER
Q54EU7	0.969	OTHER	Q54EU7	0.969	OTHER
Q54Q54	0.967	OTHER	Q54Q54	0.967	OTHER
Q54M22	0.962	OTHER	Q54M22	0.962	OTHER
Q54CY2	0.961	mTP	Q54CY2	0.961	mTP
Q54TY5	0.96	OTHER	Q54TY5	0.96	OTHER
Q54NS5	0.957	mTP	Q54NS5	0.957	mTP
Q54MU3	0.957	OTHER	Q54MU3	0.957	OTHER
Q75JZ2	0.957	OTHER	Q75JZ2	0.957	OTHER
Q54UX3	0.956	OTHER	Q54UX3	0.956	OTHER
Q54W84	0.951	OTHER	Q54W84	0.951	OTHER
Q23884	0.947	OTHER	Q23884	0.947	OTHER
Q86JI0	0.947	OTHER	Q86JI0	0.947	OTHER
Q54KP5	0.946	OTHER	Q54KP5	0.946	OTHER
Q55CD9	0.946	OTHER	Q55CD9	0.946	OTHER
Q54IB4	0.944	OTHER	Q54IB4	0.944	OTHER
Q54IH6	0.943	OTHER	Q54IH6	0.943	OTHER
Q54RB5	0.942	mTP	Q54RB5	0.942	mTP
Q54I67	0.941	OTHER	Q54I67	0.941	OTHER
Q54NV9	0.94	mTP	Q54NV9	0.94	mTP
Q54K38	0.939	OTHER	Q54K38	0.939	OTHER
Q559Z0	0.938	mTP	Q559Z0	0.938	mTP
Q8MYE6	0.938	OTHER	Q8MYE6	0.938	OTHER
Q54QN1	0.936	OTHER	Q54QN1	0.936	OTHER
Q552W5	0.936	OTHER	Q552W5	0.936	OTHER
Q54J97	0.935	mTP	Q54J97	0.935	mTP
Q55F30	0.935	mTP	Q55F30	0.935	mTP
Q54KT4	0.934	OTHER	Q54KT4	0.934	OTHER
Q86L24	0.934	OTHER	Q86L24	0.934	OTHER
Q8MXM8	0.934	OTHER	Q8MXM8	0.934	OTHER
Q54TR2	0.931	OTHER	Q54TR2	0.931	OTHER
Q55BP2	0.931	OTHER	Q55BP2	0.931	OTHER
Q54NV4	0.929	mTP	Q54NV4	0.929	mTP
Q54Y17	0.929	OTHER	Q54Y17	0.929	OTHER
Q556J9	0.929	OTHER	Q556J9	0.929	OTHER
Q54IA8	0.927	OTHER	Q54IA8	0.927	OTHER
Q54F29	0.926	OTHER	Q54F29	0.926	OTHER
Q54YS4	0.926	OTHER	Q54YS4	0.926	OTHER
Q23888	0.923	OTHER	Q23888	0.923	OTHER
Q553P7	0.921	OTHER	Q553P7	0.921	OTHER
Q55CC7	0.921	OTHER	Q55CC7	0.921	OTHER
P54872	0.918	OTHER	P54872	0.918	OTHER
Q54B10	0.918	OTHER	Q54B10	0.918	OTHER
Q54CL5	0.918	OTHER	Q54CL5	0.918	OTHER
Q54CG8	0.917	mTP	Q54CG8	0.917	mTP
Q54CK4	0.917	OTHER	Q54CK4	0.917	OTHER
Q54YB8	0.917	OTHER	Q54YB8	0.917	OTHER
Q54P46	0.916	OTHER	Q54P46	0.916	OTHER
Q54YY9	0.916	OTHER	Q54YY9	0.916	OTHER
Q54SM0	0.912	OTHER	Q54SM0	0.912	OTHER
Q54QR8	0.911	OTHER	Q54QR8	0.911	OTHER
Q1ZXN5	0.907	mTP	Q1ZXN5	0.907	mTP
Q54XK0	0.907	mTP	Q54XK0	0.907	mTP
Q54V61	0.906	OTHER	Q54V61	0.906	OTHER
Q54VG0	0.905	mTP	Q54VG0	0.905	mTP
Q54WA4	0.905	OTHER	Q54WA4	0.905	OTHER
O21034	0.903	OTHER	O21034	0.903	OTHER
Q54FE6	0.903	OTHER	Q54FE6	0.903	OTHER
Q54P39	0.903	OTHER	Q54P39	0.903	OTHER
Q86IC5	0.903	OTHER	Q86IC5	0.903	OTHER
Q54P71	0.902	OTHER	Q54P71	0.902	OTHER
Q86HR5	0.901	mTP	Q86HR5	0.901	mTP
Q55DI2	0.9	SP	Q55DI2	0.9	SP
Q55DY8	0.899	OTHER	Q55DY8	0.899	OTHER
Q86HT3	0.899	OTHER	Q86HT3	0.899	OTHER
Q54VN2	0.898	mTP	Q54VN2	0.898	mTP
B0G196	0.896	OTHER	B0G196	0.896	OTHER
Q54RE7	0.895	mTP	Q54RE7	0.895	mTP
Q54B26	0.894	OTHER	Q54B26	0.894	OTHER
Q54F95	0.894	OTHER	Q54F95	0.894	OTHER
Q54NW1	0.894	OTHER	Q54NW1	0.894	OTHER
Q55BA6	0.893	OTHER	Q55BA6	0.893	OTHER
Q86H43	0.892	mTP	Q86H43	0.892	mTP
Q54GQ7	0.892	OTHER	Q54GQ7	0.892	OTHER
Q54LV4	0.892	OTHER	Q54LV4	0.892	OTHER
Q556I5	0.892	OTHER	Q556I5	0.892	OTHER
Q54IP6	0.891	OTHER	Q54IP6	0.891	OTHER
Q54JM7	0.889	OTHER	Q54JM7	0.889	OTHER
Q54I90	0.887	OTHER	Q54I90	0.887	OTHER
Q869Z3	0.887	OTHER	Q869Z3	0.887	OTHER
Q54X39	0.886	OTHER	Q54X39	0.886	OTHER
Q54K93	0.885	OTHER	Q54K93	0.885	OTHER
Q54CQ1	0.884	OTHER	Q54CQ1	0.884	OTHER
Q55GJ3	0.884	OTHER	Q55GJ3	0.884	OTHER
Q23883	0.883	OTHER	Q23883	0.883	OTHER
Q54CZ2	0.882	OTHER	Q54CZ2	0.882	OTHER
Q54KM7	0.88	mTP	Q54KM7	0.88	mTP
Q54T03	0.88	mTP	Q54T03	0.88	mTP
Q54EV4	0.88	OTHER	Q54EV4	0.88	OTHER
Q54J94	0.879	mTP	Q54J94	0.879	mTP
Q54R89	0.879	mTP	Q54R89	0.879	mTP
Q551V0	0.879	OTHER	Q551V0	0.879	OTHER
Q55EM7	0.878	mTP	Q55EM7	0.878	mTP
Q54B68	0.876	mTP	Q54B68	0.876	mTP
Q54CX6	0.873	mTP	Q54CX6	0.873	mTP
B0G189	0.872	mTP	B0G189	0.872	mTP
Q54DG6	0.872	OTHER	Q54DG6	0.872	OTHER
Q54RP2	0.871	mTP	Q54RP2	0.871	mTP
Q54LM5	0.87	OTHER	Q54LM5	0.87	OTHER
Q55CA5	0.869	OTHER	Q55CA5	0.869	OTHER
Q54B42	0.868	OTHER	Q54B42	0.868	OTHER
Q54QM0	0.866	OTHER	Q54QM0	0.866	OTHER
Q54X32	0.866	OTHER	Q54X32	0.866	OTHER
Q54WE9	0.865	OTHER	Q54WE9	0.865	OTHER
Q55E45	0.865	OTHER	Q55E45	0.865	OTHER
Q550M3	0.864	OTHER	Q550M3	0.864	OTHER
Q54JC1	0.863	OTHER	Q54JC1	0.863	OTHER
Q55CZ7	0.862	OTHER	Q55CZ7	0.862	OTHER
Q37312	0.861	OTHER	Q37312	0.861	OTHER
Q54RV9	0.861	OTHER	Q54RV9	0.861	OTHER
Q54Z42	0.861	OTHER	Q54Z42	0.861	OTHER
Q55FG0	0.861	OTHER	Q55FG0	0.861	OTHER
Q34312	0.86	OTHER	Q34312	0.86	OTHER
Q553N9	0.859	OTHER	Q553N9	0.859	OTHER
Q54JL2	0.858	mTP	Q54JL2	0.858	mTP
Q54YT4	0.857	mTP	Q54YT4	0.857	mTP
Q54NZ0	0.857	OTHER	Q54NZ0	0.857	OTHER
Q54E61	0.856	mTP	Q54E61	0.856	mTP
Q54EE6	0.856	OTHER	Q54EE6	0.856	OTHER
Q55AI5	0.854	mTP	Q55AI5	0.854	mTP
Q54RS0	0.854	OTHER	Q54RS0	0.854	OTHER
Q54S91	0.852	OTHER	Q54S91	0.852	OTHER
Q54K15	0.851	OTHER	Q54K15	0.851	OTHER
Q54H57	0.846	OTHER	Q54H57	0.846	OTHER
Q54U71	0.846	OTHER	Q54U71	0.846	OTHER
Q8T1E2	0.846	OTHER	Q8T1E2	0.846	OTHER
Q54L14	0.845	OTHER	Q54L14	0.845	OTHER
Q55E85	0.845	OTHER	Q55E85	0.845	OTHER
Q54IF0	0.842	mTP	Q54IF0	0.842	mTP
Q54D52	0.842	OTHER	Q54D52	0.842	OTHER
Q54UC6	0.841	OTHER	Q54UC6	0.841	OTHER
Q550W3	0.841	OTHER	Q550W3	0.841	OTHER
Q55GN4	0.841	OTHER	Q55GN4	0.841	OTHER
Q553P8	0.84	OTHER	Q553P8	0.84	OTHER
Q54HS2	0.839	OTHER	Q54HS2	0.839	OTHER
Q54PP3	0.838	mTP	Q54PP3	0.838	mTP
Q95NZ8	0.838	OTHER	Q95NZ8	0.838	OTHER
Q54F42	0.837	OTHER	Q54F42	0.837	OTHER
Q86IB7	0.836	mTP	Q86IB7	0.836	mTP
Q54HY8	0.835	OTHER	Q54HY8	0.835	OTHER
Q54HU7	0.834	OTHER	Q54HU7	0.834	OTHER
Q7KWR0	0.833	OTHER	Q7KWR0	0.833	OTHER
Q54EE7	0.832	OTHER	Q54EE7	0.832	OTHER
Q54DG1	0.829	OTHER	Q54DG1	0.829	OTHER
Q555U7	0.829	OTHER	Q555U7	0.829	OTHER
Q54JT6	0.828	mTP	Q54JT6	0.828	mTP
Q54SE2	0.828	mTP	Q54SE2	0.828	mTP
Q54QG2	0.828	OTHER	Q54QG2	0.828	OTHER
Q54D67	0.827	OTHER	Q54D67	0.827	OTHER
Q54QG4	0.827	OTHER	Q54QG4	0.827	OTHER
Q86HC7	0.826	mTP	Q86HC7	0.826	mTP
Q55C99	0.826	OTHER	Q55C99	0.826	OTHER
B0G112	0.825	OTHER	B0G112	0.825	OTHER
Q54E56	0.824	OTHER	Q54E56	0.824	OTHER
Q54J76	0.824	OTHER	Q54J76	0.824	OTHER
Q54KG7	0.824	OTHER	Q54KG7	0.824	OTHER
Q553K0	0.824	OTHER	Q553K0	0.824	OTHER
Q54KY1	0.823	mTP	Q54KY1	0.823	mTP
Q76P42	0.823	OTHER	Q76P42	0.823	OTHER
Q54Q74	0.822	mTP	Q54Q74	0.822	mTP
Q54HG7	0.822	OTHER	Q54HG7	0.822	OTHER
Q54N07	0.822	OTHER	Q54N07	0.822	OTHER
Q55CR4	0.821	OTHER	Q55CR4	0.821	OTHER
P0C8Z6	0.82	OTHER	P0C8Z6	0.82	OTHER
Q54N28	0.82	OTHER	Q54N28	0.82	OTHER
Q54ZA4	0.82	OTHER	Q54ZA4	0.82	OTHER
Q54XQ5	0.819	OTHER	Q54XQ5	0.819	OTHER
Q551W4	0.819	OTHER	Q551W4	0.819	OTHER
Q54HB2	0.818	mTP	Q54HB2	0.818	mTP
Q550W5	0.818	mTP	Q550W5	0.818	mTP
Q55D11	0.818	OTHER	Q55D11	0.818	OTHER
Q54F10	0.817	mTP	Q54F10	0.817	mTP
Q55C71	0.817	mTP	Q55C71	0.817	mTP
Q54JU0	0.816	mTP	Q54JU0	0.816	mTP
Q8I0H7	0.816	mTP	Q8I0H7	0.816	mTP
Q55FL6	0.816	OTHER	Q55FL6	0.816	OTHER
Q54KY9	0.814	OTHER	Q54KY9	0.814	OTHER
Q55CN3	0.814	OTHER	Q55CN3	0.814	OTHER
Q54JI6	0.813	mTP	Q54JI6	0.813	mTP
Q54EW4	0.813	OTHER	Q54EW4	0.813	OTHER
Q55G92	0.809	mTP	Q55G92	0.809	mTP
Q54X43	0.808	OTHER	Q54X43	0.808	OTHER
Q54G34	0.807	OTHER	Q54G34	0.807	OTHER
Q55E73	0.807	OTHER	Q55E73	0.807	OTHER
Q54P95	0.805	OTHER	Q54P95	0.805	OTHER
Q54ZD0	0.805	OTHER	Q54ZD0	0.805	OTHER
Q1ZXG5	0.804	OTHER	Q1ZXG5	0.804	OTHER
Q54RT6	0.802	SP	Q54RT6	0.802	SP
Q54VM8	0.801	mTP	Q54VM8	0.801	mTP
Q557I2	0.801	OTHER	Q557I2	0.801	OTHER
Q9GSE7	0.801	OTHER	Q9GSE7	0.801	OTHER
Q54P99	0.8	OTHER	Q54P99	0.8	OTHER
Q869S7	0.799	OTHER	Q869S7	0.799	OTHER
Q55DB5	0.798	OTHER	Q55DB5	0.798	OTHER
Q86KA1	0.797	mTP	Q86KA1	0.797	mTP
P0C7W5	0.797	OTHER	P0C7W5	0.797	OTHER
Q75JG3	0.796	mTP	Q75JG3	0.796	mTP
Q54YA9	0.796	OTHER	Q54YA9	0.796	OTHER
Q86L21	0.796	OTHER	Q86L21	0.796	OTHER
Q54L87	0.795	OTHER	Q54L87	0.795	OTHER
Q54RB8	0.794	SP	Q54RB8	0.794	SP
Q54DX7	0.794	OTHER	Q54DX7	0.794	OTHER
Q75K12	0.794	OTHER	Q75K12	0.794	OTHER
P34093	0.793	mTP	P34093	0.793	mTP
Q1ZXF1	0.793	mTP	Q1ZXF1	0.793	mTP
Q54I63	0.793	mTP	Q54I63	0.793	mTP
Q54DF5	0.793	SP	Q54DF5	0.793	SP
Q54YM4	0.792	mTP	Q54YM4	0.792	mTP
Q54JV7	0.791	mTP	Q54JV7	0.791	mTP
Q54UP1	0.791	OTHER	Q54UP1	0.791	OTHER
Q54FU9	0.79	OTHER	Q54FU9	0.79	OTHER
Q54VA2	0.79	OTHER	Q54VA2	0.79	OTHER
Q54QF9	0.789	mTP	Q54QF9	0.789	mTP
Q54CD3	0.789	OTHER	Q54CD3	0.789	OTHER
Q54VB8	0.788	mTP	Q54VB8	0.788	mTP
Q54NN6	0.788	OTHER	Q54NN6	0.788	OTHER
Q559H1	0.788	OTHER	Q559H1	0.788	OTHER
Q55G50	0.788	OTHER	Q55G50	0.788	OTHER
Q54LD3	0.787	OTHER	Q54LD3	0.787	OTHER
Q54M99	0.785	OTHER	Q54M99	0.785	OTHER
Q554U7	0.785	OTHER	Q554U7	0.785	OTHER
Q76NT0	0.784	OTHER	Q76NT0	0.784	OTHER
Q553V1	0.783	mTP	Q553V1	0.783	mTP
Q54KI1	0.783	OTHER	Q54KI1	0.783	OTHER
Q54GF3	0.782	OTHER	Q54GF3	0.782	OTHER
Q54H24	0.777	OTHER	Q54H24	0.777	OTHER
Q55DJ4	0.777	OTHER	Q55DJ4	0.777	OTHER
P0C7B6	0.776	OTHER	P0C7B6	0.776	OTHER
Q54XQ3	0.776	OTHER	Q54XQ3	0.776	OTHER
Q75JQ5	0.776	OTHER	Q75JQ5	0.776	OTHER
Q54BW1	0.772	OTHER	Q54BW1	0.772	OTHER
Q54JK2	0.771	mTP	Q54JK2	0.771	mTP
Q54PI8	0.771	OTHER	Q54PI8	0.771	OTHER
Q55BM7	0.771	OTHER	Q55BM7	0.771	OTHER
Q86IZ2	0.771	OTHER	Q86IZ2	0.771	OTHER
B0G117	0.769	OTHER	B0G117	0.769	OTHER
Q54PM3	0.769	OTHER	Q54PM3	0.769	OTHER
Q557D9	0.769	OTHER	Q557D9	0.769	OTHER
Q54WD9	0.768	mTP	Q54WD9	0.768	mTP
O76740	0.767	mTP	O76740	0.767	mTP
Q54MZ7	0.766	mTP	Q54MZ7	0.766	mTP
Q54X18	0.766	OTHER	Q54X18	0.766	OTHER
Q55GH8	0.766	OTHER	Q55GH8	0.766	OTHER
Q55BQ4	0.765	OTHER	Q55BQ4	0.765	OTHER
Q54KY0	0.763	OTHER	Q54KY0	0.763	OTHER
P34136	0.762	mTP	P34136	0.762	mTP
Q54VU7	0.762	OTHER	Q54VU7	0.762	OTHER
Q54LP4	0.761	mTP	Q54LP4	0.761	mTP
Q23887	0.761	OTHER	Q23887	0.761	OTHER
Q54I88	0.76	mTP	Q54I88	0.76	mTP
O21043	0.76	OTHER	O21043	0.76	OTHER
Q54QN2	0.76	OTHER	Q54QN2	0.76	OTHER
Q75JK9	0.759	mTP	Q75JK9	0.759	mTP
Q54GJ7	0.757	OTHER	Q54GJ7	0.757	OTHER
Q54SI5	0.754	mTP	Q54SI5	0.754	mTP
Q8T2J9	0.751	mTP	Q8T2J9	0.751	mTP
Q54Q67	0.75	OTHER	Q54Q67	0.75	OTHER
Q55C48	0.75	OTHER	Q55C48	0.75	OTHER
Q55F21	0.748	mTP	Q55F21	0.748	mTP
Q555D9	0.748	OTHER	Q555D9	0.748	OTHER
Q86H28	0.747	OTHER	Q86H28	0.747	OTHER
Q8T9W2	0.745	OTHER	Q8T9W2	0.745	OTHER
Q75JR2	0.744	mTP	Q75JR2	0.744	mTP
Q54D65	0.744	OTHER	Q54D65	0.744	OTHER
Q54J68	0.742	OTHER	Q54J68	0.742	OTHER
Q55EJ5	0.741	OTHER	Q55EJ5	0.741	OTHER
Q54F94	0.739	OTHER	Q54F94	0.739	OTHER
Q869N1	0.739	OTHER	Q869N1	0.739	OTHER
Q54N93	0.735	OTHER	Q54N93	0.735	OTHER
Q54EW1	0.731	mTP	Q54EW1	0.731	mTP
Q55GI5	0.731	OTHER	Q55GI5	0.731	OTHER
Q8MP20	0.73	OTHER	Q8MP20	0.73	OTHER
Q54NR3	0.728	OTHER	Q54NR3	0.728	OTHER
Q54IN6	0.727	OTHER	Q54IN6	0.727	OTHER
Q55BK8	0.727	OTHER	Q55BK8	0.727	OTHER
Q54TR5	0.725	OTHER	Q54TR5	0.725	OTHER
Q54WI6	0.725	OTHER	Q54WI6	0.725	OTHER
Q54LV3	0.724	mTP	Q54LV3	0.724	mTP
Q54PY7	0.724	OTHER	Q54PY7	0.724	OTHER
Q55CK8	0.724	OTHER	Q55CK8	0.724	OTHER
Q550C8	0.723	OTHER	Q550C8	0.723	OTHER
Q55C31	0.722	OTHER	Q55C31	0.722	OTHER
Q54CV4	0.715	mTP	Q54CV4	0.715	mTP
Q54Y94	0.713	mTP	Q54Y94	0.713	mTP
Q556U7	0.713	mTP	Q556U7	0.713	mTP
Q54FV8	0.713	OTHER	Q54FV8	0.713	OTHER
Q54XM2	0.712	mTP	Q54XM2	0.712	mTP
Q54QJ9	0.712	OTHER	Q54QJ9	0.712	OTHER
O21033	0.711	OTHER	O21033	0.711	OTHER
Q86H49	0.709	OTHER	Q86H49	0.709	OTHER
Q54ZW4	0.708	mTP	Q54ZW4	0.708	mTP
Q55BJ9	0.708	OTHER	Q55BJ9	0.708	OTHER
Q55GS6	0.708	OTHER	Q55GS6	0.708	OTHER
Q55EN1	0.707	OTHER	Q55EN1	0.707	OTHER
Q54ET5	0.705	mTP	Q54ET5	0.705	mTP
Q54IW8	0.705	mTP	Q54IW8	0.705	mTP
Q54DY9	0.705	OTHER	Q54DY9	0.705	OTHER
Q55BM0	0.704	OTHER	Q55BM0	0.704	OTHER
Q54CW7	0.703	mTP	Q54CW7	0.703	mTP
Q54E22	0.703	mTP	Q54E22	0.703	mTP
C7G039	0.703	OTHER	C7G039	0.703	OTHER
Q54L63	0.702	OTHER	Q54L63	0.702	OTHER
Q554Z5	0.701	mTP	Q554Z5	0.701	mTP
Q54GI9	0.701	SP	Q54GI9	0.701	SP
Q55D12	0.701	OTHER	Q55D12	0.701	OTHER
Q54WC5	0.7	OTHER	Q54WC5	0.7	OTHER
Q1ZXK7	0.698	OTHER	Q1ZXK7	0.698	OTHER
Q54N05	0.695	OTHER	Q54N05	0.695	OTHER
Q55CJ1	0.695	OTHER	Q55CJ1	0.695	OTHER
Q54X21	0.694	OTHER	Q54X21	0.694	OTHER
Q54CL7	0.693	mTP	Q54CL7	0.693	mTP
Q54XR1	0.69	OTHER	Q54XR1	0.69	OTHER
Q55ER8	0.689	OTHER	Q55ER8	0.689	OTHER
Q552L1	0.687	OTHER	Q552L1	0.687	OTHER
Q553T7	0.687	OTHER	Q553T7	0.687	OTHER
Q9U1M9	0.687	OTHER	Q9U1M9	0.687	OTHER
Q54HD3	0.686	OTHER	Q54HD3	0.686	OTHER
Q54HM4	0.684	OTHER	Q54HM4	0.684	OTHER
Q55CY6	0.681	OTHER	Q55CY6	0.681	OTHER
Q55G83	0.681	OTHER	Q55G83	0.681	OTHER
Q54T58	0.68	OTHER	Q54T58	0.68	OTHER
Q86L04	0.679	mTP	Q86L04	0.679	mTP
Q54II4	0.679	OTHER	Q54II4	0.679	OTHER
Q54JK1	0.678	OTHER	Q54JK1	0.678	OTHER
Q54W39	0.678	OTHER	Q54W39	0.678	OTHER
Q55D22	0.677	OTHER	Q55D22	0.677	OTHER
Q54N47	0.676	mTP	Q54N47	0.676	mTP
Q555U6	0.675	OTHER	Q555U6	0.675	OTHER
Q552P9	0.674	OTHER	Q552P9	0.674	OTHER
Q54IC8	0.673	OTHER	Q54IC8	0.673	OTHER
Q55BF4	0.673	OTHER	Q55BF4	0.673	OTHER
Q54Z70	0.672	OTHER	Q54Z70	0.672	OTHER
Q55GI2	0.672	OTHER	Q55GI2	0.672	OTHER
Q555C8	0.67	mTP	Q555C8	0.67	mTP
Q54EU1	0.668	OTHER	Q54EU1	0.668	OTHER
Q550P4	0.667	mTP	Q550P4	0.667	mTP
Q34313	0.667	OTHER	Q34313	0.667	OTHER
Q54FN9	0.667	OTHER	Q54FN9	0.667	OTHER
Q54W51	0.667	OTHER	Q54W51	0.667	OTHER
Q54SV6	0.666	mTP	Q54SV6	0.666	mTP
Q54XD9	0.664	OTHER	Q54XD9	0.664	OTHER
Q54KB7	0.663	mTP	Q54KB7	0.663	mTP
Q54JR3	0.663	OTHER	Q54JR3	0.663	OTHER
Q54KV4	0.662	OTHER	Q54KV4	0.662	OTHER
Q54PL9	0.662	OTHER	Q54PL9	0.662	OTHER
Q75JQ7	0.662	OTHER	Q75JQ7	0.662	OTHER
Q54JT0	0.661	OTHER	Q54JT0	0.661	OTHER
Q54L16	0.66	OTHER	Q54L16	0.66	OTHER
Q75JQ8	0.66	OTHER	Q75JQ8	0.66	OTHER
Q54C45	0.658	mTP	Q54C45	0.658	mTP
Q869N8	0.658	mTP	Q869N8	0.658	mTP
Q54F37	0.657	OTHER	Q54F37	0.657	OTHER
Q54GH8	0.657	OTHER	Q54GH8	0.657	OTHER
Q55A06	0.657	OTHER	Q55A06	0.657	OTHER
Q55ES5	0.655	OTHER	Q55ES5	0.655	OTHER
Q54BU5	0.652	OTHER	Q54BU5	0.652	OTHER
Q54HH1	0.652	OTHER	Q54HH1	0.652	OTHER
Q8WSV6	0.65	mTP	Q8WSV6	0.65	mTP
Q54U47	0.65	OTHER	Q54U47	0.65	OTHER
Q55FI3	0.649	OTHER	Q55FI3	0.649	OTHER
Q54I58	0.646	mTP	Q54I58	0.646	mTP
Q9GPZ7	0.646	mTP	Q9GPZ7	0.646	mTP
Q869Z4	0.645	mTP	Q869Z4	0.645	mTP
Q54BN1	0.644	OTHER	Q54BN1	0.644	OTHER
Q54D03	0.643	OTHER	Q54D03	0.643	OTHER
Q86HC3	0.643	OTHER	Q86HC3	0.643	OTHER
Q559Z1	0.642	OTHER	Q559Z1	0.642	OTHER
Q54T08	0.641	mTP	Q54T08	0.641	mTP
Q551D9	0.64	OTHER	Q551D9	0.64	OTHER
Q551Y3	0.637	mTP	Q551Y3	0.637	mTP
Q54B71	0.637	OTHER	Q54B71	0.637	OTHER
Q552R4	0.637	OTHER	Q552R4	0.637	OTHER
Q86A68	0.637	OTHER	Q86A68	0.637	OTHER
Q559P3	0.635	OTHER	Q559P3	0.635	OTHER
Q55BE1	0.635	OTHER	Q55BE1	0.635	OTHER
Q86AD9	0.634	mTP	Q86AD9	0.634	mTP
Q86HS0	0.634	mTP	Q86HS0	0.634	mTP
Q54IQ1	0.633	mTP	Q54IQ1	0.633	mTP
B0G178	0.633	OTHER	B0G178	0.633	OTHER
Q552K6	0.633	OTHER	Q552K6	0.633	OTHER
Q55GN7	0.632	OTHER	Q55GN7	0.632	OTHER
Q54YK4	0.628	mTP	Q54YK4	0.628	mTP
Q54GQ0	0.628	OTHER	Q54GQ0	0.628	OTHER
Q54KE6	0.627	OTHER	Q54KE6	0.627	OTHER
Q554U6	0.625	OTHER	Q554U6	0.625	OTHER
Q54YU4	0.624	OTHER	Q54YU4	0.624	OTHER
Q55C00	0.622	OTHER	Q55C00	0.622	OTHER
Q54CE4	0.621	mTP	Q54CE4	0.621	mTP
Q54XE3	0.621	OTHER	Q54XE3	0.621	OTHER
Q37315	0.62	OTHER	Q37315	0.62	OTHER
Q54MY0	0.619	OTHER	Q54MY0	0.619	OTHER
Q86A90	0.619	OTHER	Q86A90	0.619	OTHER
Q54RR5	0.617	OTHER	Q54RR5	0.617	OTHER
Q54WC6	0.616	OTHER	Q54WC6	0.616	OTHER
Q54VR5	0.614	OTHER	Q54VR5	0.614	OTHER
Q54P40	0.613	mTP	Q54P40	0.613	mTP
Q54WM5	0.609	OTHER	Q54WM5	0.609	OTHER
Q54K91	0.608	OTHER	Q54K91	0.608	OTHER
Q54S83	0.607	mTP	Q54S83	0.607	mTP
Q54FD7	0.607	OTHER	Q54FD7	0.607	OTHER
Q8T133	0.607	OTHER	Q8T133	0.607	OTHER
Q54SX4	0.606	OTHER	Q54SX4	0.606	OTHER
Q54B22	0.605	OTHER	Q54B22	0.605	OTHER
Q54G50	0.605	OTHER	Q54G50	0.605	OTHER
Q54DD3	0.604	OTHER	Q54DD3	0.604	OTHER
Q54MZ8	0.603	mTP	Q54MZ8	0.603	mTP
Q54HW4	0.603	OTHER	Q54HW4	0.603	OTHER
Q55E30	0.603	OTHER	Q55E30	0.603	OTHER
Q8T663	0.603	OTHER	Q8T663	0.603	OTHER
Q54VC5	0.6	OTHER	Q54VC5	0.6	OTHER
Q55CI6	0.6	OTHER	Q55CI6	0.6	OTHER
Q54T46	0.598	OTHER	Q54T46	0.598	OTHER
Q7KWY4	0.598	OTHER	Q7KWY4	0.598	OTHER
Q54LP9	0.594	OTHER	Q54LP9	0.594	OTHER
Q54WD4	0.594	OTHER	Q54WD4	0.594	OTHER
Q550Q8	0.593	mTP	Q550Q8	0.593	mTP
Q54B20	0.592	mTP	Q54B20	0.592	mTP
Q54R43	0.59	OTHER	Q54R43	0.59	OTHER
Q54JV8	0.589	mTP	Q54JV8	0.589	mTP
Q55E52	0.588	mTP	Q55E52	0.588	mTP
Q54IL4	0.588	OTHER	Q54IL4	0.588	OTHER
Q556V1	0.588	OTHER	Q556V1	0.588	OTHER
Q55ER6	0.586	OTHER	Q55ER6	0.586	OTHER
C7G061	0.585	OTHER	C7G061	0.585	OTHER
Q86A84	0.585	OTHER	Q86A84	0.585	OTHER
Q54VS1	0.584	OTHER	Q54VS1	0.584	OTHER
Q556J1	0.584	OTHER	Q556J1	0.584	OTHER
Q54MJ5	0.582	OTHER	Q54MJ5	0.582	OTHER
Q557I0	0.581	OTHER	Q557I0	0.581	OTHER
Q54X04	0.579	mTP	Q54X04	0.579	mTP
Q54UK1	0.578	OTHER	Q54UK1	0.578	OTHER
Q54ZY3	0.575	mTP	Q54ZY3	0.575	mTP
Q54W24	0.573	OTHER	Q54W24	0.573	OTHER
Q55CV9	0.573	OTHER	Q55CV9	0.573	OTHER
Q869L9	0.571	mTP	Q869L9	0.571	mTP
Q54M56	0.57	OTHER	Q54M56	0.57	OTHER
Q37311	0.569	OTHER	Q37311	0.569	OTHER
Q54VS7	0.569	OTHER	Q54VS7	0.569	OTHER
Q54NS1	0.567	OTHER	Q54NS1	0.567	OTHER
Q54G84	0.566	OTHER	Q54G84	0.566	OTHER
Q54GL4	0.565	mTP	Q54GL4	0.565	mTP
Q55CJ9	0.564	OTHER	Q55CJ9	0.564	OTHER
Q54DF7	0.563	OTHER	Q54DF7	0.563	OTHER
B0G119	0.562	mTP	B0G119	0.562	mTP
Q54I91	0.562	mTP	Q54I91	0.562	mTP
Q54PT6	0.56	OTHER	Q54PT6	0.56	OTHER
Q55GU4	0.559	SP	Q55GU4	0.559	SP
O21038	0.558	OTHER	O21038	0.558	OTHER
Q54NC1	0.557	SP	Q54NC1	0.557	SP
Q54N67	0.557	OTHER	Q54N67	0.557	OTHER
Q54JT8	0.555	OTHER	Q54JT8	0.555	OTHER
Q54G97	0.552	OTHER	Q54G97	0.552	OTHER
Q54D04	0.55	mTP	Q54D04	0.55	mTP
Q55EC5	0.548	mTP	Q55EC5	0.548	mTP
Q54UT2	0.547	mTP	Q54UT2	0.547	mTP
Q54DY1	0.545	mTP	Q54DY1	0.545	mTP
Q54G19	0.545	OTHER	Q54G19	0.545	OTHER
Q54LW3	0.544	OTHER	Q54LW3	0.544	OTHER
Q54BM8	0.541	OTHER	Q54BM8	0.541	OTHER
Q37313	0.54	OTHER	Q37313	0.54	OTHER
Q55EZ9	0.54	OTHER	Q55EZ9	0.54	OTHER
Q54MY2	0.536	OTHER	Q54MY2	0.536	OTHER
Q54NS9	0.536	OTHER	Q54NS9	0.536	OTHER
Q54HG5	0.535	mTP	Q54HG5	0.535	mTP
Q9GPS1	0.532	OTHER	Q9GPS1	0.532	OTHER
Q54JW0	0.53	mTP	Q54JW0	0.53	mTP
Q54ND0	0.53	SP	Q54ND0	0.53	SP
Q54DN9	0.526	mTP	Q54DN9	0.526	mTP
Q556I2	0.526	OTHER	Q556I2	0.526	OTHER
Q55F22	0.526	OTHER	Q55F22	0.526	OTHER
Q54ES4	0.525	OTHER	Q54ES4	0.525	OTHER
Q54SG2	0.525	OTHER	Q54SG2	0.525	OTHER
Q54UH1	0.525	OTHER	Q54UH1	0.525	OTHER
Q54IA0	0.523	OTHER	Q54IA0	0.523	OTHER
Q54PT4	0.523	OTHER	Q54PT4	0.523	OTHER
Q54I27	0.522	OTHER	Q54I27	0.522	OTHER
Q54VE8	0.522	OTHER	Q54VE8	0.522	OTHER
Q54UQ6	0.521	OTHER	Q54UQ6	0.521	OTHER
Q55DT8	0.521	OTHER	Q55DT8	0.521	OTHER
Q54QP9	0.52	mTP	Q54QP9	0.52	mTP
Q54SI4	0.52	OTHER	Q54SI4	0.52	OTHER
Q8I7W9	0.518	OTHER	Q8I7W9	0.518	OTHER
Q54Y72	0.517	OTHER	Q54Y72	0.517	OTHER
Q86JL2	0.514	mTP	Q86JL2	0.514	mTP
Q54MJ1	0.513	OTHER	Q54MJ1	0.513	OTHER
Q54T75	0.513	OTHER	Q54T75	0.513	OTHER
Q555E3	0.513	OTHER	Q555E3	0.513	OTHER
Q54NZ8	0.512	OTHER	Q54NZ8	0.512	OTHER
Q54NM6	0.51	OTHER	Q54NM6	0.51	OTHER
Q86L22	0.508	OTHER	Q86L22	0.508	OTHER
Q55A40	0.507	mTP	Q55A40	0.507	mTP
Q54D12	0.507	OTHER	Q54D12	0.507	OTHER
Q54M86	0.506	OTHER	Q54M86	0.506	OTHER
Q54W88	0.504	mTP	Q54W88	0.504	mTP
Q55FI1	0.504	mTP	Q55FI1	0.504	mTP
Q75K17	0.504	mTP	Q75K17	0.504	mTP
Q553V2	0.502	mTP	Q553V2	0.502	mTP
Q54GF1	0.502	OTHER	Q54GF1	0.502	OTHER
Q54WE8	0.5	OTHER	Q54WE8	0.5	OTHER
Q54CT8	0.497	OTHER	Q54CT8	0.497	OTHER
Q54QE2	0.497	OTHER	Q54QE2	0.497	OTHER
Q54F06	0.495	OTHER	Q54F06	0.495	OTHER
Q54HN7	0.495	OTHER	Q54HN7	0.495	OTHER
Q55C52	0.495	OTHER	Q55C52	0.495	OTHER
Q554C4	0.494	OTHER	Q554C4	0.494	OTHER
Q55DQ6	0.494	OTHER	Q55DQ6	0.494	OTHER
Q54XS2	0.493	mTP	Q54XS2	0.493	mTP
Q54IY2	0.493	OTHER	Q54IY2	0.493	OTHER
Q54K35	0.493	OTHER	Q54K35	0.493	OTHER
Q7KWX2	0.492	mTP	Q7KWX2	0.492	mTP
O21045	0.492	OTHER	O21045	0.492	OTHER
Q54BH0	0.492	OTHER	Q54BH0	0.492	OTHER
Q54WJ1	0.492	OTHER	Q54WJ1	0.492	OTHER
Q54I78	0.491	mTP	Q54I78	0.491	mTP
Q553I0	0.49	SP	Q553I0	0.49	SP
Q54S35	0.487	OTHER	Q54S35	0.487	OTHER
Q54XF6	0.487	OTHER	Q54XF6	0.487	OTHER
Q54P88	0.484	OTHER	Q54P88	0.484	OTHER
Q75JL2	0.483	OTHER	Q75JL2	0.483	OTHER
Q556S6	0.481	OTHER	Q556S6	0.481	OTHER
Q54YF3	0.48	OTHER	Q54YF3	0.48	OTHER
Q54YR4	0.479	OTHER	Q54YR4	0.479	OTHER
Q54XX9	0.477	OTHER	Q54XX9	0.477	OTHER
Q54IM8	0.476	mTP	Q54IM8	0.476	mTP
Q55GM6	0.476	OTHER	Q55GM6	0.476	OTHER
Q54M18	0.475	mTP	Q54M18	0.475	mTP
Q54Y25	0.474	OTHER	Q54Y25	0.474	OTHER
Q54ID0	0.472	OTHER	Q54ID0	0.472	OTHER
Q54E57	0.471	OTHER	Q54E57	0.471	OTHER
Q54J36	0.471	OTHER	Q54J36	0.471	OTHER
Q54V88	0.47	OTHER	Q54V88	0.47	OTHER
Q54BY9	0.468	OTHER	Q54BY9	0.468	OTHER
Q54QI7	0.468	OTHER	Q54QI7	0.468	OTHER
Q54N68	0.467	mTP	Q54N68	0.467	mTP
Q54HV4	0.466	OTHER	Q54HV4	0.466	OTHER
Q8MP58	0.466	OTHER	Q8MP58	0.466	OTHER
Q55E63	0.465	OTHER	Q55E63	0.465	OTHER
Q54CX2	0.457	OTHER	Q54CX2	0.457	OTHER
Q9NKW1	0.457	OTHER	Q9NKW1	0.457	OTHER
Q54ND5	0.455	SP	Q54ND5	0.455	SP
Q54UW1	0.454	OTHER	Q54UW1	0.454	OTHER
Q55BN2	0.452	OTHER	Q55BN2	0.452	OTHER
Q869B9	0.451	OTHER	Q869B9	0.451	OTHER
Q54KR0	0.45	OTHER	Q54KR0	0.45	OTHER
Q55C94	0.45	OTHER	Q55C94	0.45	OTHER
Q55GW1	0.446	OTHER	Q55GW1	0.446	OTHER
Q55FL0	0.443	OTHER	Q55FL0	0.443	OTHER
Q7KWW3	0.438	mTP	Q7KWW3	0.438	mTP
Q55GW0	0.434	OTHER	Q55GW0	0.434	OTHER
Q54GK8	0.433	OTHER	Q54GK8	0.433	OTHER
Q54RR6	0.427	OTHER	Q54RR6	0.427	OTHER
Q54K52	0.426	mTP	Q54K52	0.426	mTP
Q54BJ5	0.426	OTHER	Q54BJ5	0.426	OTHER
Q54L05	0.425	OTHER	Q54L05	0.425	OTHER
Q54Q52	0.425	OTHER	Q54Q52	0.425	OTHER
Q54Z02	0.425	OTHER	Q54Z02	0.425	OTHER
Q54R47	0.424	mTP	Q54R47	0.424	mTP
Q9UA41	0.424	OTHER	Q9UA41	0.424	OTHER
Q55E67	0.423	OTHER	Q55E67	0.423	OTHER
Q54RW4	0.421	OTHER	Q54RW4	0.421	OTHER
Q54V95	0.421	OTHER	Q54V95	0.421	OTHER
Q54XZ1	0.419	OTHER	Q54XZ1	0.419	OTHER
Q54YE8	0.419	OTHER	Q54YE8	0.419	OTHER
Q54YZ4	0.418	OTHER	Q54YZ4	0.418	OTHER
Q556H6	0.418	OTHER	Q556H6	0.418	OTHER
Q55G90	0.416	mTP	Q55G90	0.416	mTP
Q54MI5	0.416	OTHER	Q54MI5	0.416	OTHER
Q1ZXC3	0.411	mTP	Q1ZXC3	0.411	mTP
Q54DW1	0.411	OTHER	Q54DW1	0.411	OTHER
Q86HW2	0.41	SP	Q86HW2	0.41	SP
Q55FZ5	0.41	OTHER	Q55FZ5	0.41	OTHER
Q966U0	0.41	OTHER	Q966U0	0.41	OTHER
Q54XS7	0.408	OTHER	Q54XS7	0.408	OTHER
Q86KA4	0.407	mTP	Q86KA4	0.407	mTP
Q54VB0	0.404	OTHER	Q54VB0	0.404	OTHER
Q555E4	0.402	OTHER	Q555E4	0.402	OTHER
P13231	0.401	OTHER	P13231	0.401	OTHER
Q54Y48	0.4	OTHER	Q54Y48	0.4	OTHER
Q54CC6	0.398	OTHER	Q54CC6	0.398	OTHER
Q55CH9	0.398	OTHER	Q55CH9	0.398	OTHER
Q54JX1	0.397	OTHER	Q54JX1	0.397	OTHER
Q54JE9	0.394	OTHER	Q54JE9	0.394	OTHER
Q54PL1	0.392	mTP	Q54PL1	0.392	mTP
Q551M9	0.39	OTHER	Q551M9	0.39	OTHER
Q54HW0	0.389	OTHER	Q54HW0	0.389	OTHER
Q556S5	0.389	OTHER	Q556S5	0.389	OTHER
Q55AF6	0.388	OTHER	Q55AF6	0.388	OTHER
Q55BF9	0.387	OTHER	Q55BF9	0.387	OTHER
Q55D85	0.387	OTHER	Q55D85	0.387	OTHER
Q54NX3	0.386	mTP	Q54NX3	0.386	mTP
Q54S63	0.386	OTHER	Q54S63	0.386	OTHER
Q55E82	0.385	OTHER	Q55E82	0.385	OTHER
Q75JI5	0.384	OTHER	Q75JI5	0.384	OTHER
Q54N98	0.383	OTHER	Q54N98	0.383	OTHER
P32253	0.382	OTHER	P32253	0.382	OTHER
Q54W30	0.382	OTHER	Q54W30	0.382	OTHER
Q55AP1	0.381	SP	Q55AP1	0.381	SP
Q55BT7	0.375	SP	Q55BT7	0.375	SP
Q54EX7	0.373	OTHER	Q54EX7	0.373	OTHER
Q54KX3	0.373	OTHER	Q54KX3	0.373	OTHER
Q54RZ5	0.371	OTHER	Q54RZ5	0.371	OTHER
Q54KH2	0.37	OTHER	Q54KH2	0.37	OTHER
Q86K31	0.369	OTHER	Q86K31	0.369	OTHER
Q55GG9	0.368	OTHER	Q55GG9	0.368	OTHER
Q54JE3	0.366	OTHER	Q54JE3	0.366	OTHER
Q54M25	0.363	SP	Q54M25	0.363	SP
Q54JV0	0.36	OTHER	Q54JV0	0.36	OTHER
Q55AW9	0.36	OTHER	Q55AW9	0.36	OTHER
Q54W18	0.358	SP	Q54W18	0.358	SP
Q27564	0.355	OTHER	Q27564	0.355	OTHER
Q54JV3	0.355	OTHER	Q54JV3	0.355	OTHER
Q557J5	0.353	OTHER	Q557J5	0.353	OTHER
Q550H2	0.351	OTHER	Q550H2	0.351	OTHER
Q54LN5	0.349	SP	Q54LN5	0.349	SP
Q54EX8	0.349	OTHER	Q54EX8	0.349	OTHER
Q54IA1	0.349	OTHER	Q54IA1	0.349	OTHER
Q54VE2	0.349	OTHER	Q54VE2	0.349	OTHER
Q54GC2	0.348	OTHER	Q54GC2	0.348	OTHER
Q54L39	0.348	OTHER	Q54L39	0.348	OTHER
Q7KWV8	0.348	OTHER	Q7KWV8	0.348	OTHER
Q54FG4	0.347	OTHER	Q54FG4	0.347	OTHER
Q54XE8	0.347	OTHER	Q54XE8	0.347	OTHER
Q55D58	0.347	OTHER	Q55D58	0.347	OTHER
P42526	0.345	OTHER	P42526	0.345	OTHER
Q54FK8	0.345	OTHER	Q54FK8	0.345	OTHER
Q54NM3	0.345	OTHER	Q54NM3	0.345	OTHER
Q75JC5	0.345	OTHER	Q75JC5	0.345	OTHER
Q54SL9	0.344	OTHER	Q54SL9	0.344	OTHER
Q54XL8	0.344	OTHER	Q54XL8	0.344	OTHER
Q550C1	0.344	OTHER	Q550C1	0.344	OTHER
Q54RX7	0.343	OTHER
Q1ZXQ4	0.342	SP
Q54BT7	0.342	OTHER
Q86L18	0.34	SP
Q54T09	0.337	SP
Q54XX2	0.337	OTHER
Q55EY5	0.337	OTHER
Q54EA1	0.336	OTHER
Q554R7	0.336	OTHER
Q54TH7	0.335	OTHER
Q54U30	0.335	OTHER
Q55AA7	0.335	OTHER
Q55BL6	0.335	OTHER
Q54KL1	0.334	OTHER
Q54P72	0.332	OTHER
Q54VL3	0.33	OTHER
Q86JP3	0.327	OTHER
B0G180	0.326	SP
Q7KWQ5	0.326	OTHER
Q551G6	0.325	OTHER
Q55AX2	0.323	OTHER
Q54I12	0.322	OTHER
Q86JM5	0.322	OTHER
Q54LF0	0.321	OTHER
Q54SC0	0.321	OTHER
P21837	0.32	SP
Q54TB0	0.32	OTHER
Q55BU8	0.319	OTHER
Q54IP9	0.318	OTHER
Q553T0	0.317	OTHER
Q54GE6	0.315	OTHER
Q54LM1	0.315	OTHER
Q54NZ6	0.315	OTHER
P34112	0.314	OTHER
Q55C85	0.314	OTHER
Q54VM9	0.313	OTHER
Q552J9	0.313	OTHER
Q54HJ4	0.312	SP
Q54IZ7	0.312	OTHER
Q54LL8	0.312	OTHER
Q54TZ7	0.311	OTHER
Q86H81	0.311	OTHER
Q8MXQ2	0.31	OTHER
Q54YY2	0.308	OTHER
Q54F34	0.307	OTHER
Q54IS6	0.307	OTHER
Q54Q89	0.307	OTHER
Q54Y14	0.306	OTHER
Q54K78	0.305	OTHER
Q54TE2	0.305	OTHER
Q54IT3	0.304	OTHER
Q54JR9	0.304	OTHER
Q54P77	0.304	OTHER
Q54CX3	0.303	OTHER
Q54LK9	0.303	OTHER
Q54YG0	0.303	OTHER
Q55D90	0.303	OTHER
Q55GE4	0.303	OTHER
Q54H86	0.302	OTHER
Q86JM6	0.301	OTHER
Q54DR1	0.3	OTHER
Q54EL0	0.3	OTHER
Q54WT8	0.3	OTHER
Q557K0	0.3	OTHER
Q54VY2	0.296	OTHER
Q54VR8	0.295	OTHER
Q54BP9	0.294	OTHER
Q54FE7	0.294	OTHER
Q54US8	0.294	OTHER
Q54C55	0.293	OTHER
Q54MM0	0.293	OTHER
Q54U86	0.293	OTHER
Q86HH3	0.292	SP
O96759	0.292	OTHER
Q54RN6	0.292	OTHER
Q54TM1	0.292	OTHER
Q55D76	0.292	OTHER
Q86B08	0.292	OTHER
Q54L60	0.291	SP
Q54Y78	0.291	OTHER
Q86AC7	0.291	OTHER
Q1ZXP8	0.29	mTP
Q54W86	0.29	OTHER
Q8T2K9	0.29	OTHER
Q54JB3	0.288	OTHER
Q54RA2	0.287	mTP
Q54WT0	0.287	OTHER
Q54CZ3	0.286	OTHER
Q54VJ4	0.286	OTHER
Q8I7T3	0.285	SP
P36409	0.284	OTHER
Q75JT6	0.284	OTHER
Q54E40	0.283	mTP
O21035	0.283	OTHER
Q54BJ7	0.283	OTHER
Q54SS0	0.283	OTHER
Q54XZ0	0.283	OTHER
Q55GH1	0.283	OTHER
Q76P23	0.283	OTHER
C7G083	0.282	OTHER
Q54FB6	0.282	OTHER
Q54K01	0.282	OTHER
Q54T73	0.28	SP
Q54Q75	0.28	OTHER
Q54RR4	0.279	OTHER
Q9NCL8	0.279	OTHER
O77229	0.278	OTHER
Q54N85	0.278	OTHER
Q54Q49	0.278	OTHER
Q54QU7	0.278	OTHER
Q55E31	0.278	OTHER
Q55GI4	0.278	OTHER
Q54W35	0.277	OTHER
Q86HD0	0.277	OTHER
Q54VC7	0.276	OTHER
Q75JR6	0.276	OTHER
Q86JP5	0.276	OTHER
Q54DE8	0.275	OTHER
Q54HJ3	0.275	OTHER
Q54MC4	0.275	OTHER
Q54NK3	0.275	OTHER
Q558W0	0.275	OTHER
Q559X6	0.275	OTHER
Q55BS8	0.275	OTHER
Q8T8P3	0.275	OTHER
Q54R79	0.274	OTHER
Q86H96	0.274	OTHER
Q86JM0	0.273	SP
Q54KW2	0.273	OTHER
Q86HN8	0.273	OTHER
Q54JM9	0.272	mTP
Q54NX5	0.272	OTHER
Q54N25	0.271	OTHER
Q54SV1	0.271	OTHER
Q54DN0	0.27	OTHER
Q54FF5	0.27	OTHER
Q54VX1	0.27	OTHER
Q8T690	0.27	OTHER
Q54RX9	0.269	OTHER
Q55DD1	0.269	OTHER
Q54MJ7	0.267	mTP
Q55AC2	0.267	SP
Q1ZXD9	0.267	OTHER
Q55ED8	0.267	OTHER
Q9NH03	0.267	OTHER
Q54BC0	0.266	SP
Q54CN4	0.266	OTHER
Q54D09	0.266	OTHER
Q550P3	0.266	OTHER
Q54LK1	0.265	OTHER
Q54LP7	0.265	OTHER
P13773	0.264	OTHER
Q55EH0	0.263	SP
Q54CT9	0.263	OTHER
Q54DZ2	0.263	OTHER
Q54EM7	0.263	OTHER
Q54FL5	0.263	OTHER
Q54BK7	0.262	OTHER
Q54TR4	0.262	OTHER
Q55DI9	0.262	OTHER
Q9BPU3	0.262	OTHER
Q54KL4	0.261	SP
Q550H5	0.261	SP
Q54FX5	0.261	OTHER
Q54TP9	0.261	OTHER
Q55G25	0.261	OTHER
Q55GF0	0.261	OTHER
Q65YR7	0.261	OTHER
Q54T88	0.26	SP
P20790	0.26	OTHER
Q54C61	0.26	OTHER
Q54JQ5	0.26	OTHER
Q54TP6	0.26	OTHER
Q8T126	0.26	OTHER
C7G041	0.258	OTHER
Q54BX7	0.258	OTHER
Q54GY8	0.258	OTHER
Q54HK2	0.258	OTHER
Q54P57	0.258	OTHER
Q554F5	0.258	OTHER
Q557F6	0.258	OTHER
Q54L98	0.257	OTHER
Q54QR3	0.257	OTHER
Q86AD3	0.257	OTHER
Q86KB4	0.257	OTHER
Q54DT9	0.256	OTHER
Q86JE3	0.256	OTHER
Q54N80	0.255	SP
Q54MD6	0.254	SP
Q54U91	0.254	SP
Q54XH8	0.254	SP
Q54C64	0.254	OTHER
Q86B20	0.254	OTHER
Q8MXL9	0.254	OTHER
Q54XV0	0.253	SP
Q54C86	0.253	OTHER
Q54T29	0.253	OTHER
Q8MMQ2	0.253	OTHER
Q552H9	0.252	SP
P34139	0.252	OTHER
Q54G07	0.252	OTHER
Q54N40	0.252	OTHER
Q54NU2	0.252	OTHER
Q54QD5	0.252	OTHER
Q55BC7	0.252	OTHER
Q54HL1	0.251	OTHER
Q557K5	0.251	OTHER
Q55G26	0.251	OTHER
Q9GNF0	0.251	OTHER
Q1ZXE4	0.25	SP
Q54PD6	0.25	SP
Q54CL3	0.25	OTHER
Q54QY9	0.25	OTHER
Q54SC3	0.25	OTHER
Q54Z16	0.25	OTHER
Q54VZ2	0.249	SP
Q54Y52	0.249	SP
Q556M4	0.249	SP
Q54CG0	0.249	OTHER
Q54FL2	0.249	OTHER
Q54T65	0.249	OTHER
Q869W1	0.249	OTHER
Q54DW9	0.248	OTHER
Q54H87	0.248	OTHER
Q54M88	0.248	OTHER
Q55CT6	0.248	OTHER
Q86IY4	0.248	OTHER
P54679	0.247	OTHER
Q54EA4	0.247	OTHER
Q54EY9	0.247	OTHER
Q54TF9	0.247	OTHER
Q54XP9	0.247	OTHER
Q8MXQ3	0.247	OTHER
Q54E89	0.246	OTHER
Q54GM8	0.246	OTHER
Q54IS5	0.246	OTHER
Q55DN4	0.246	OTHER
Q75JN1	0.246	OTHER
Q8T9W1	0.246	OTHER
Q556C6	0.245	SP
Q54G71	0.245	OTHER
Q556W2	0.245	OTHER
Q86AG5	0.245	OTHER
Q54EK3	0.244	SP
Q54CX4	0.244	OTHER
Q54IV4	0.244	OTHER
Q54KN2	0.244	OTHER
Q54LY6	0.244	OTHER
Q55EI7	0.243	SP
Q58A41	0.243	OTHER
Q6B9X6	0.243	OTHER
Q86KR0	0.243	OTHER
P34140	0.242	OTHER
Q54HR7	0.242	OTHER
Q54IC9	0.242	OTHER
Q54X09	0.242	OTHER
Q54VZ3	0.241	SP
Q54T95	0.241	OTHER
Q54WQ4	0.241	OTHER
Q54WW9	0.241	OTHER
Q75JL8	0.241	OTHER
Q54ET0	0.24	SP
Q55CJ8	0.24	SP
Q54F92	0.24	OTHER
Q86JD4	0.24	OTHER
Q54QY8	0.239	SP
Q54RF6	0.239	SP
Q54G35	0.239	OTHER
Q54L26	0.239	OTHER
Q54LK8	0.239	OTHER
Q556R8	0.239	OTHER
Q6S000	0.239	OTHER
P16051	0.238	OTHER
Q55FZ9	0.238	OTHER
Q86K43	0.238	OTHER
Q86KX9	0.238	OTHER
P0CD60	0.237	OTHER
Q54ID5	0.237	OTHER
Q54Q56	0.237	OTHER
Q54W97	0.237	OTHER
Q55G63	0.236	SP
P36408	0.236	OTHER
Q54DF4	0.236	OTHER
Q54GP6	0.236	OTHER
Q550G0	0.236	OTHER
Q55FJ4	0.236	OTHER
Q8MMR8	0.236	OTHER
Q54GQ6	0.235	OTHER
Q54K22	0.235	OTHER
Q54QH3	0.235	OTHER
Q54UD0	0.235	OTHER
Q86H60	0.235	OTHER
Q86HX3	0.235	OTHER
Q54HR9	0.234	OTHER
Q54K44	0.234	OTHER
Q54PA2	0.234	OTHER
Q54QL9	0.234	OTHER
Q54X97	0.234	OTHER
Q55BN8	0.234	OTHER
Q55DS5	0.234	OTHER
Q9Y1W0	0.234	OTHER
Q54WK9	0.233	SP
Q55EF7	0.233	SP
Q54BV1	0.233	OTHER
Q55D78	0.233	OTHER
Q54HH9	0.232	SP
Q54UB6	0.232	SP
B0G0Y8	0.232	OTHER
C7G026	0.232	OTHER
Q54G63	0.232	OTHER
Q54U08	0.232	OTHER
Q54VK1	0.232	OTHER
Q54VY0	0.232	OTHER
Q555E8	0.232	OTHER
Q86IF9	0.232	OTHER
Q54P23	0.231	SP
Q54H73	0.231	OTHER
Q54RN4	0.231	OTHER
Q54Y03	0.231	OTHER
Q551L2	0.231	OTHER
Q55EF0	0.231	OTHER
Q86AD8	0.231	OTHER
Q54JA3	0.23	SP
Q54U89	0.23	SP
B0G183	0.23	OTHER
Q54R62	0.23	OTHER
Q54VH1	0.23	OTHER
Q556S2	0.23	OTHER
Q558K8	0.23	OTHER
Q55D94	0.23	OTHER
Q86AF6	0.23	OTHER
Q8T2T7	0.23	OTHER
Q9BKJ9	0.23	OTHER
Q54V92	0.229	SP
Q55GJ2	0.229	SP
Q54XJ2	0.229	OTHER
C7FZW2	0.228	OTHER
P34043	0.228	OTHER
Q54CR1	0.228	OTHER
Q54IP5	0.228	OTHER
Q54RD7	0.228	OTHER
Q558Y5	0.228	OTHER
Q86A18	0.228	OTHER
Q54IN0	0.227	OTHER
Q54NE5	0.227	OTHER
Q54TZ8	0.227	OTHER
Q55BE9	0.227	OTHER
Q55GJ9	0.227	OTHER
Q55BR2	0.226	OTHER
Q55DE2	0.226	OTHER
Q55EP5	0.226	OTHER
Q55GQ9	0.226	OTHER
Q54R07	0.225	mTP
Q54GR8	0.225	SP
Q54BD7	0.225	OTHER
Q54CY5	0.225	OTHER
Q55AR1	0.225	OTHER
Q55BC2	0.225	OTHER
Q55EQ9	0.225	OTHER
Q86JC9	0.225	OTHER
Q86JK8	0.225	OTHER
Q55GP7	0.224	SP
Q75JT4	0.224	SP
Q54N72	0.224	OTHER
Q54XK2	0.224	OTHER
Q54Y30	0.224	OTHER
Q54YN3	0.224	OTHER
Q54SQ0	0.223	SP
Q54D90	0.223	OTHER
Q54N59	0.223	OTHER
Q54NQ7	0.223	OTHER
Q54SN3	0.223	OTHER
Q75JI6	0.223	OTHER
Q54N74	0.222	SP
Q869Q9	0.222	SP
Q54FA1	0.222	OTHER
Q54RT4	0.222	OTHER
Q55FU9	0.222	OTHER
Q86LA2	0.222	OTHER
Q54ID8	0.221	SP
Q54TN9	0.221	SP
Q55FV9	0.221	SP
Q54H98	0.221	OTHER
Q869T6	0.221	OTHER
Q869W8	0.221	OTHER
Q54QH1	0.22	SP
Q54PF1	0.22	OTHER
Q54QP7	0.22	OTHER
Q54RJ3	0.22	OTHER
Q55AI8	0.22	OTHER
Q95US4	0.219	SP
Q54CD8	0.219	OTHER
Q54YU8	0.219	OTHER
Q55CT3	0.219	OTHER
Q55BA8	0.218	SP
Q54GG3	0.218	OTHER
Q54KZ8	0.218	OTHER
Q54RC3	0.218	OTHER
Q54XJ6	0.218	OTHER
Q55EM4	0.217	SP
Q54CD6	0.217	OTHER
Q54HU9	0.217	OTHER
Q54JU2	0.217	OTHER
Q54WD3	0.217	OTHER
Q54YP8	0.217	OTHER
Q8MMS1	0.217	OTHER
Q869Z0	0.216	SP
Q1ZXJ3	0.216	OTHER
Q54G37	0.216	OTHER
Q54N54	0.216	OTHER
Q54S87	0.216	OTHER
Q54TW5	0.216	OTHER
Q55C97	0.216	OTHER
Q55DN6	0.216	OTHER
Q55G49	0.216	OTHER
Q55GP6	0.216	OTHER
Q54DH6	0.215	OTHER
Q54EM3	0.215	OTHER
Q54IP3	0.215	OTHER
Q54ME7	0.215	OTHER
Q54NL0	0.215	OTHER
Q54P37	0.215	OTHER
Q54Q29	0.215	OTHER
Q55CP4	0.215	OTHER
Q54GN0	0.214	SP
Q54HG9	0.214	SP
Q54VI6	0.214	SP
Q769F9	0.214	SP
Q9NKX1	0.214	SP
Q54MP3	0.214	OTHER
Q54R41	0.214	OTHER
Q54YU5	0.214	OTHER
Q55ET3	0.214	OTHER
Q7KWW0	0.214	OTHER
Q9NA13	0.214	OTHER
Q54TU1	0.213	SP
Q552B8	0.213	SP
Q54CR2	0.213	OTHER
Q54DW2	0.213	OTHER
Q54IP7	0.213	OTHER
Q54PQ9	0.213	OTHER
Q54RT5	0.213	OTHER
Q55BH9	0.213	OTHER
Q55BV1	0.213	OTHER
Q55ET6	0.213	OTHER
Q55GN0	0.213	OTHER
Q86I95	0.213	OTHER
Q54XX6	0.212	SP
Q55FH2	0.212	SP
Q54CD7	0.212	OTHER
Q54GM0	0.212	OTHER
Q54IC2	0.212	OTHER
Q54IF3	0.212	OTHER
Q54MS0	0.212	OTHER
Q55FR8	0.212	OTHER
Q54LC0	0.211	SP
Q54XJ9	0.211	SP
Q769F6	0.211	SP
C7G057	0.211	OTHER
Q54I50	0.211	OTHER
Q54PL2	0.211	OTHER
Q54Q18	0.211	OTHER
Q54VM5	0.211	OTHER
Q55E20	0.211	OTHER
Q86A08	0.211	OTHER
Q86K95	0.211	OTHER
Q54G55	0.21	SP
Q55D57	0.21	SP
Q54II1	0.21	OTHER
Q54Q97	0.21	OTHER
Q869L7	0.21	OTHER
Q86I62	0.21	OTHER
Q86IL9	0.21	OTHER
Q8T683	0.21	OTHER
Q54HE1	0.209	SP
Q54IT4	0.209	SP
Q54N33	0.209	SP
Q54NS0	0.209	SP
Q54ZJ9	0.209	SP
Q556Y0	0.209	SP
Q9GTN7	0.209	SP
P0CD61	0.209	OTHER
P18161	0.209	OTHER
Q1ZXN2	0.209	OTHER
Q54MK9	0.209	OTHER
Q54N46	0.209	OTHER
Q54NA9	0.209	OTHER
Q54XJ8	0.209	OTHER
Q551S2	0.209	OTHER
Q55E32	0.209	OTHER
Q86IG3	0.209	OTHER
Q95ZG8	0.209	OTHER
Q54U18	0.208	SP
Q54U38	0.208	SP
Q55BY2	0.208	SP
B0G126	0.208	OTHER
C7G025	0.208	OTHER
Q54EQ3	0.208	OTHER
Q54H71	0.208	OTHER
Q54HX1	0.208	OTHER
Q54J42	0.208	OTHER
Q54K69	0.208	OTHER
Q54LW4	0.208	OTHER
Q54QZ6	0.208	OTHER
Q55FV0	0.208	OTHER
Q75JY0	0.208	OTHER
Q869T2	0.208	OTHER
Q86AH6	0.208	OTHER
Q86HL5	0.208	OTHER
Q9NGW9	0.208	OTHER
Q54IC1	0.207	SP
Q86L17	0.207	SP
B0G197	0.207	OTHER
P34142	0.207	OTHER
Q1ZXA8	0.207	OTHER
Q54CN5	0.207	OTHER
Q54JK0	0.207	OTHER
Q54R04	0.207	OTHER
Q54E62	0.206	SP
P54642	0.206	OTHER
Q54BP1	0.206	OTHER
Q54CC5	0.206	OTHER
Q54LU8	0.206	OTHER
Q54TZ6	0.206	OTHER
Q54XP6	0.206	OTHER
Q55B58	0.206	OTHER
Q95ZG3	0.206	OTHER
P34115	0.205	SP
Q54R45	0.205	SP
Q55A32	0.205	SP
Q54D61	0.205	OTHER
Q54J57	0.205	OTHER
Q54JQ6	0.205	OTHER
Q54TK6	0.205	OTHER
Q553Y7	0.205	OTHER
Q55FK2	0.205	OTHER
Q55FP7	0.205	OTHER
Q75JQ3	0.205	OTHER
Q559Z3	0.204	SP
Q55FU1	0.204	SP
Q54BI6	0.204	OTHER
Q54P61	0.204	OTHER
Q54S23	0.204	OTHER
Q54WG3	0.204	OTHER
Q55EX3	0.204	OTHER
Q6S002	0.204	OTHER
Q86HQ9	0.204	OTHER
P22684	0.203	OTHER
Q54D76	0.203	OTHER
Q54FB1	0.203	OTHER
Q54GY6	0.203	OTHER
Q54HB0	0.203	OTHER
Q54LN2	0.203	OTHER
Q54WM4	0.203	OTHER
Q55AW5	0.203	OTHER
Q55F81	0.203	OTHER
Q55GF9	0.203	OTHER
Q6RZZ9	0.203	OTHER
Q86AF0	0.203	OTHER
Q86KS1	0.203	OTHER
Q8T154	0.203	OTHER
Q55AX3	0.202	SP
Q55E18	0.202	SP
Q23862	0.202	OTHER
Q54CH1	0.202	OTHER
Q54Q53	0.202	OTHER
Q54R42	0.202	OTHER
Q54TD8	0.202	OTHER
Q54U20	0.202	OTHER
Q54Z90	0.202	OTHER
Q550W1	0.202	OTHER
Q86A74	0.202	OTHER
Q86H65	0.202	OTHER
Q54DP5	0.201	SP
Q54LX7	0.201	SP
Q55DX6	0.201	SP
Q8T191	0.201	SP
Q54CW5	0.201	OTHER
Q54E47	0.201	OTHER
Q54NL4	0.201	OTHER
Q54SY9	0.201	OTHER
Q54WC9	0.201	OTHER
Q556T4	0.201	OTHER
Q55DT6	0.201	OTHER
Q86K74	0.201	OTHER
Q54C27	0.2	SP
Q54ZW6	0.2	SP
Q55AM9	0.2	SP
Q55CD0	0.2	SP
P34046	0.2	OTHER
Q54G01	0.2	OTHER
Q54IE9	0.2	OTHER
Q54IL3	0.2	OTHER
Q54KR6	0.2	OTHER
Q54NN4	0.2	OTHER
Q54NS7	0.2	OTHER
Q54PE0	0.2	OTHER
Q556M3	0.2	OTHER
Q55BU9	0.2	OTHER
Q55E35	0.2	OTHER
Q58A42	0.199	SP
Q86AX2	0.199	SP
Q54BH3	0.199	OTHER
Q54F65	0.199	OTHER
Q54HY6	0.199	OTHER
Q54RP8	0.199	OTHER
Q555Q0	0.199	OTHER
Q556T9	0.199	OTHER
Q558U1	0.199	OTHER
Q55BS2	0.199	OTHER
Q55FN8	0.199	OTHER
Q8ST87	0.199	OTHER
Q54DV7	0.198	OTHER
Q54IM3	0.198	OTHER
Q54IT8	0.198	OTHER
Q54JY1	0.198	OTHER
Q54LE2	0.198	OTHER
Q54M68	0.198	OTHER
Q54PL0	0.198	OTHER
Q54QC4	0.198	OTHER
Q54T20	0.198	OTHER
Q54UL9	0.198	OTHER
Q553M8	0.198	OTHER
Q55FR0	0.198	OTHER
Q54HU4	0.197	SP
Q54NY5	0.197	SP
P36412	0.197	OTHER
Q54CN8	0.197	OTHER
Q54CN9	0.197	OTHER
Q54DL5	0.197	OTHER
Q54JR2	0.197	OTHER
Q54KE2	0.197	OTHER
Q54Y70	0.197	OTHER
Q54ZM4	0.197	OTHER
Q55DQ2	0.197	OTHER
Q55FR2	0.197	OTHER
Q54CJ5	0.196	SP
Q54W34	0.196	SP
Q554H4	0.196	SP
Q54EC2	0.196	OTHER
Q54EQ0	0.196	OTHER
Q54H94	0.196	OTHER
Q54MC0	0.196	OTHER
Q54QW1	0.196	OTHER
Q554G9	0.196	OTHER
Q559A6	0.196	OTHER
Q55CW2	0.196	OTHER
Q86J15	0.196	OTHER
Q54IS9	0.195	SP
Q54KF7	0.195	SP
Q54WF5	0.195	SP
C7FZX8	0.195	OTHER
C7FZZ4	0.195	OTHER
Q54D59	0.195	OTHER
Q54IU0	0.195	OTHER
Q54K07	0.195	OTHER
Q54M17	0.195	OTHER
Q54NB6	0.195	OTHER
Q54P87	0.195	OTHER
Q54RJ1	0.195	OTHER
Q54TN1	0.195	OTHER
Q55CF7	0.195	OTHER
Q55EV9	0.195	OTHER
Q54BW3	0.194	SP
Q55EH9	0.194	SP
C7G032	0.194	OTHER
P16894	0.194	OTHER
P34042	0.194	OTHER
Q54CC0	0.194	OTHER
Q54H97	0.194	OTHER
Q54HJ2	0.194	OTHER
Q54LV2	0.194	OTHER
Q54NP0	0.194	OTHER
Q54NP1	0.194	OTHER
Q54P78	0.194	OTHER
Q54VB9	0.194	OTHER
Q54XA0	0.194	OTHER
Q54XZ5	0.194	OTHER
Q55BR9	0.194	OTHER
Q55EK2	0.193	SP
Q55FE2	0.193	SP
Q1ZXA6	0.193	OTHER
Q54RB0	0.193	OTHER
Q54S31	0.193	OTHER
Q54S75	0.193	OTHER
Q54WY9	0.193	OTHER
Q54XT3	0.193	OTHER
Q55GH9	0.193	OTHER
Q86I68	0.193	OTHER
Q86JE7	0.193	OTHER
Q54ED0	0.192	SP
Q54GM7	0.192	SP
Q54RQ1	0.192	SP
Q54BM0	0.192	OTHER
Q54HN2	0.192	OTHER
Q54I54	0.192	OTHER
Q54SQ5	0.192	OTHER
Q55C65	0.192	OTHER
Q55EN6	0.192	OTHER
Q86KG4	0.192	OTHER
Q559Q5	0.191	SP
P15064	0.191	OTHER
Q54C49	0.191	OTHER
Q54IV7	0.191	OTHER
Q54JC0	0.191	OTHER
Q54MG1	0.191	OTHER
Q54S52	0.191	OTHER
Q54X28	0.191	OTHER
Q554U9	0.191	OTHER
Q556H0	0.191	OTHER
Q55CR0	0.191	OTHER
Q55DA0	0.191	OTHER
Q55F59	0.191	OTHER
Q75JP0	0.191	OTHER
Q869P0	0.191	OTHER
Q54F76	0.19	SP
Q8T869	0.19	SP
Q54I93	0.19	OTHER
Q54NS3	0.19	OTHER
Q54SH9	0.19	OTHER
Q54TZ2	0.19	OTHER
Q54U14	0.19	OTHER
Q54WZ6	0.19	OTHER
Q556Y3	0.19	OTHER
Q558Z2	0.19	OTHER
C7FZX1	0.189	SP
Q1ZXH9	0.189	SP
Q559R8	0.189	SP
Q86HP9	0.189	SP
Q54D69	0.189	OTHER
Q54SG3	0.189	OTHER
Q54T45	0.189	OTHER
Q54Y32	0.189	OTHER
Q54Y95	0.189	OTHER
Q86K66	0.189	OTHER
Q9GPR2	0.189	OTHER
Q54S39	0.188	SP
Q54TD6	0.188	SP
Q54U09	0.188	SP
Q54WY3	0.188	SP
Q556L7	0.188	SP
O76173	0.188	OTHER
Q1ZXK9	0.188	OTHER
Q54E41	0.188	OTHER
Q54IP8	0.188	OTHER
Q54JT3	0.188	OTHER
Q54LH2	0.188	OTHER
Q54PM5	0.188	OTHER
Q54RL6	0.188	OTHER
Q54TY6	0.188	OTHER
Q54XI6	0.188	OTHER
Q553P6	0.188	OTHER
Q55D98	0.188	OTHER
Q55DA4	0.188	OTHER
Q86IX2	0.188	OTHER
Q54EJ0	0.187	SP
Q54L67	0.187	SP
Q54S26	0.187	SP
Q75JL6	0.187	SP
Q54KT3	0.187	OTHER
Q54NA7	0.187	OTHER
Q54NM9	0.187	OTHER
Q54SA3	0.187	OTHER
Q54TH2	0.187	OTHER
Q54VS6	0.187	OTHER
Q551J1	0.187	OTHER
Q552L6	0.187	OTHER
Q556W1	0.187	OTHER
Q559U2	0.187	OTHER
Q7KWS8	0.187	OTHER
Q86KC3	0.187	OTHER
Q54XI0	0.186	SP
Q54YF9	0.186	SP
Q554K2	0.186	SP
Q769F7	0.186	SP
Q54H40	0.186	OTHER
Q54HM5	0.186	OTHER
Q54JV6	0.186	OTHER
Q54MN3	0.186	OTHER
Q54Q11	0.186	OTHER
Q54Q94	0.186	OTHER
Q54TP5	0.186	OTHER
Q54U96	0.186	OTHER
Q54XT1	0.186	OTHER
Q54XT6	0.186	OTHER
Q54Y80	0.186	OTHER
Q551H0	0.186	OTHER
Q55DJ2	0.186	OTHER
Q55F68	0.186	OTHER
Q55GV0	0.185	SP
Q75JP4	0.185	SP
Q54DJ5	0.185	OTHER
Q54GC3	0.185	OTHER
Q54I22	0.185	OTHER
Q54IG1	0.185	OTHER
Q54KQ7	0.185	OTHER
Q54X37	0.185	OTHER
Q553U1	0.185	OTHER
Q55BH7	0.185	OTHER
Q55BH8	0.185	OTHER
Q55DD4	0.185	OTHER
Q55DN3	0.185	OTHER
Q75JJ9	0.185	OTHER
Q76P11	0.185	OTHER
Q86IW5	0.185	OTHER
Q8T6J5	0.185	OTHER
Q9U7C9	0.185	OTHER
Q54KB3	0.184	SP
Q8T2J5	0.184	SP
P32254	0.184	OTHER
Q54H95	0.184	OTHER
Q54IF2	0.184	OTHER
Q54IS7	0.184	OTHER
Q54LW8	0.184	OTHER
Q54T76	0.184	OTHER
Q54Y33	0.184	OTHER
Q54ZK3	0.184	OTHER
Q557G0	0.184	OTHER
Q55AW6	0.184	OTHER
Q55DV5	0.184	OTHER
Q55G58	0.184	OTHER
B0G182	0.183	SP
Q54K30	0.183	SP
Q55FB4	0.183	SP
Q55GS3	0.183	SP
Q54BH1	0.183	OTHER
Q54CW9	0.183	OTHER
Q54EQ1	0.183	OTHER
Q54L85	0.183	OTHER
Q54TU9	0.183	OTHER
Q54UB0	0.183	OTHER
Q54ZU0	0.183	OTHER
Q550Z9	0.183	OTHER
Q552Y2	0.183	OTHER
Q55DJ3	0.183	OTHER
Q86B10	0.183	OTHER
Q54EN4	0.182	SP
Q54JA5	0.182	SP
Q54QP2	0.182	SP
Q55CZ0	0.182	SP
C7G018	0.182	OTHER
Q54BV7	0.182	OTHER
Q54EX5	0.182	OTHER
Q54KE5	0.182	OTHER
Q54KJ9	0.182	OTHER
Q54NM8	0.182	OTHER
Q54NR5	0.182	OTHER
Q54WA3	0.182	OTHER
Q54Y04	0.182	OTHER
Q556P0	0.182	OTHER
Q559D0	0.182	OTHER
Q8MQU6	0.182	OTHER
Q54EN7	0.181	SP
Q54P68	0.181	SP
Q54RN1	0.181	SP
Q54X80	0.181	SP
Q54YP0	0.181	SP
Q55B15	0.181	SP
Q54F99	0.181	OTHER
Q54FB9	0.181	OTHER
Q54QE1	0.181	OTHER
Q54QQ2	0.181	OTHER
Q54RX2	0.181	OTHER
Q54UZ7	0.181	OTHER
Q54VI7	0.181	OTHER
Q550V0	0.181	OTHER
Q555C4	0.181	OTHER
Q55F47	0.181	OTHER
Q86HC5	0.181	OTHER
Q54DU3	0.18	SP
Q54ED1	0.18	SP
Q54M21	0.18	SP
Q54SV2	0.18	SP
Q55BK1	0.18	SP
Q55CJ5	0.18	SP
Q55GT0	0.18	SP
O76329	0.18	OTHER
P34143	0.18	OTHER
Q23915	0.18	OTHER
Q54B45	0.18	OTHER
Q54BH4	0.18	OTHER
Q54F38	0.18	OTHER
Q54FY0	0.18	OTHER
Q54I84	0.18	OTHER
Q54K74	0.18	OTHER
Q54MD1	0.18	OTHER
Q54QP6	0.18	OTHER
Q54RZ3	0.18	OTHER
Q54S81	0.18	OTHER
Q54XX1	0.18	OTHER
Q54YV7	0.18	OTHER
Q55BI4	0.18	OTHER
Q55CV1	0.18	OTHER
Q54EB9	0.179	SP
Q55EJ2	0.179	SP
Q54K99	0.179	OTHER
Q54MP1	0.179	OTHER
Q54NM4	0.179	OTHER
Q54TL0	0.179	OTHER
Q54W52	0.179	OTHER
Q55D05	0.179	OTHER
Q869R3	0.179	OTHER
Q8T268	0.179	OTHER
Q95ZG4	0.179	OTHER
P08796	0.178	SP
Q54E34	0.178	OTHER
Q54GW1	0.178	OTHER
Q54H47	0.178	OTHER
Q54KL3	0.178	OTHER
Q54L07	0.178	OTHER
Q54LH0	0.178	OTHER
Q54MZ0	0.178	OTHER
Q54P80	0.178	OTHER
Q54Q95	0.178	OTHER
Q54R87	0.178	OTHER
Q54TV8	0.178	OTHER
Q551H4	0.178	OTHER
Q55B24	0.178	OTHER
Q55FL5	0.178	OTHER
Q55FW3	0.178	OTHER
Q7KWY3	0.178	OTHER
Q86HN7	0.178	OTHER
Q8MYF2	0.178	OTHER
Q8T2J7	0.178	OTHER
Q54H59	0.177	SP
Q54VN3	0.177	SP
Q55D91	0.177	SP
B0G0Z6	0.177	OTHER
Q54CK2	0.177	OTHER
Q54F86	0.177	OTHER
Q54FD6	0.177	OTHER
Q54HI6	0.177	OTHER
Q54J81	0.177	OTHER
Q54LT2	0.177	OTHER
Q54QM6	0.177	OTHER
Q54WK0	0.177	OTHER
Q54WR8	0.177	OTHER
Q54XG0	0.177	OTHER
Q54Y38	0.177	OTHER
Q54YB2	0.177	OTHER
Q55BV4	0.177	OTHER
Q6TMJ4	0.177	OTHER
Q76NV1	0.177	OTHER
Q7KWR7	0.177	OTHER
Q86AH0	0.177	OTHER
Q86K35	0.177	OTHER
Q9GPS6	0.177	OTHER
Q54P59	0.176	SP
B0G0Y4	0.176	OTHER
Q54EB4	0.176	OTHER
Q54FZ1	0.176	OTHER
Q54HS1	0.176	OTHER
Q54KJ7	0.176	OTHER
Q54L23	0.176	OTHER
Q54PE8	0.176	OTHER
Q54PI5	0.176	OTHER
Q54TT9	0.176	OTHER
Q54VH3	0.176	OTHER
Q54WJ0	0.176	OTHER
Q555B8	0.176	OTHER
Q555L7	0.176	OTHER
Q55CT1	0.176	OTHER
Q55E97	0.176	OTHER
Q55EB8	0.176	OTHER
Q55FD0	0.176	OTHER
Q55FR4	0.176	OTHER
Q54QE0	0.175	SP
Q55E19	0.175	SP
Q54F47	0.175	OTHER
Q54JH5	0.175	OTHER
Q54MR8	0.175	OTHER
Q54MT0	0.175	OTHER
Q54W55	0.175	OTHER
Q555V7	0.175	OTHER
Q55F12	0.175	OTHER
Q55FS7	0.175	OTHER
Q86B05	0.175	OTHER
Q54L53	0.174	SP
Q54VT5	0.174	SP
Q54W89	0.174	SP
Q55B99	0.174	SP
Q8T282	0.174	SP
B0G121	0.174	OTHER
P18613	0.174	OTHER
Q54C85	0.174	OTHER
Q54IB7	0.174	OTHER
Q54RB1	0.174	OTHER
Q54U33	0.174	OTHER
Q558Y3	0.174	OTHER
Q7KWL3	0.174	OTHER
Q86KP9	0.174	OTHER
Q54GR7	0.173	SP
Q8STF9	0.173	SP
Q54CW3	0.173	OTHER
Q54HC8	0.173	OTHER
Q54Q60	0.173	OTHER
Q54SG1	0.173	OTHER
Q54X23	0.173	OTHER
Q54XB2	0.173	OTHER
Q54XQ6	0.173	OTHER
Q54YF6	0.173	OTHER
Q54ZX7	0.173	OTHER
Q55BS3	0.173	OTHER
Q55CT7	0.173	OTHER
Q55D20	0.173	OTHER
Q76NW7	0.173	OTHER
Q54SS3	0.172	SP
Q54JW8	0.172	OTHER
Q54LQ0	0.172	OTHER
Q54LW5	0.172	OTHER
Q54M62	0.172	OTHER
Q54N73	0.172	OTHER
Q54QQ3	0.172	OTHER
Q54TS2	0.172	OTHER
Q54W56	0.172	OTHER
Q54XC3	0.172	OTHER
Q55AQ3	0.172	OTHER
Q55DC1	0.172	OTHER
Q55DL5	0.172	OTHER
Q86IH5	0.172	OTHER
Q9UAG7	0.172	OTHER
P54660	0.171	SP
Q1ZXL7	0.171	SP
Q54BT3	0.171	OTHER
Q54LF1	0.171	OTHER
Q54LP3	0.171	OTHER
Q54M52	0.171	OTHER
Q54ML4	0.171	OTHER
Q54QE9	0.171	OTHER
Q54QF2	0.171	OTHER
Q54VY8	0.171	OTHER
Q54XB5	0.171	OTHER
Q54Z25	0.171	OTHER
Q550C4	0.171	OTHER
Q554N4	0.171	OTHER
Q55EX4	0.171	OTHER
Q55FJ8	0.171	OTHER
Q869Y3	0.171	OTHER
Q54CK5	0.17	SP
Q54JJ9	0.17	SP
Q54M63	0.17	SP
Q86IA3	0.17	SP
O76542	0.17	OTHER
Q1ZXN8	0.17	OTHER
Q54BL2	0.17	OTHER
Q54BN8	0.17	OTHER
Q54DD1	0.17	OTHER
Q54G70	0.17	OTHER
Q54I21	0.17	OTHER
Q54PB2	0.17	OTHER
Q54UZ8	0.17	OTHER
Q55DW4	0.17	OTHER
Q55F26	0.17	OTHER
Q86KB5	0.17	OTHER
Q54DG5	0.169	SP
Q54GX9	0.169	SP
Q54L31	0.169	SP
Q1ZXC2	0.169	OTHER
Q54FE3	0.169	OTHER
Q54FH7	0.169	OTHER
Q54IP4	0.169	OTHER
Q54M29	0.169	OTHER
Q54PL7	0.169	OTHER
Q54V68	0.169	OTHER
Q54VT4	0.169	OTHER
Q54W87	0.169	OTHER
Q54ZN9	0.169	OTHER
Q550I3	0.169	OTHER
Q557B3	0.169	OTHER
Q55DI4	0.169	OTHER
Q55ED4	0.169	OTHER
Q55GD6	0.169	OTHER
Q5V9F0	0.169	OTHER
Q86KU7	0.169	OTHER
Q54QK3	0.168	SP
Q55F28	0.168	SP
Q7YSJ4	0.168	SP
B0G111	0.168	OTHER
P36411	0.168	OTHER
Q54CD1	0.168	OTHER
Q54DP8	0.168	OTHER
Q54GG4	0.168	OTHER
Q54JE2	0.168	OTHER
Q54JL9	0.168	OTHER
Q54KF3	0.168	OTHER
Q54SB7	0.168	OTHER
Q54X10	0.168	OTHER
Q54XT8	0.168	OTHER
Q54XX7	0.168	OTHER
[truncated: 4,895 more rows]

## Sheet: Table S5
Table S5. Microscopy validation of relative enrichment ratio cutoff. Localization patterns of proteins used to verify the RER cutoff. A red highlight indicates proteins that were removed from the final mitochondrial compendium while a green highlight indicates proteins that were added to the final mitochondrial compendium based on the protein’s localization. Proteins that were unable to be synthe…
Dicty Uniprot ID	DictyBase ID	Localization	Specific	RER
Q75JQ7	DDB_G0272226	Excluded	Cytoplasm	0.662
Q54BM8	DDB_G0293552	Excluded	Cytoplasm	0.541
Q54UW1	DDB_G0280783	Excluded	Cytoplasm and nucleus	0.454			Key
Q54KH2	DDB_G0287441	Excluded	Puncta	0.37			Removed from compendium based on microscopy evidence
Q54EA1	DDB_G0291704	Excluded	Endoplasmic reticulum	0.336			Added to compendium based on microscopy evidence
Q54LK9	DDB_G0286793	Excluded	Puncta	0.303			Unable to be synthesized or transfected
Q86JM6	DDB_G0272006	Excluded	Endoplasmic reticulum	0.301			Has human MitoCarta homolog
Q86JM0	DDB_G0272030	Excluded	Endoplasmic reticulum	0.273
Q54TN1	DDB_G0281653	Excluded	Puncta	0.195
Q559Q5	DDB_G0272458	Excluded	Endoplasmic reticulum	0.191
Q54KT3	DDB_G0287189	Excluded	Endoplasmic reticulum	0.187
Q54W87	DDB_G0279829	Excluded	Endoplasmic reticulum	0.169
Q86I88	DDB_G0271890	Excluded	Endoplasmic reticulum	0.166
Q55GI0	DDB_G0349279	Excluded	Endoplasmic reticulum	0.16
Q54II6	DDB_G0288727	Excluded	Cytoplasm	0.15
Q54DG7	DDB_G0292284	Excluded	Cytoplasm	0.139
Q54UR3	DDB_G0280875	Excluded	Cytoplasm and nucleus	0.124
Q54EP9	DDB_G0291408	Excluded	Cytoplasm and nucleus	0.076
Q55DW2	DDB_G0269506	Excluded	Cytoplasm and nucleus	0.065
Q54FI6	DDB_G0290821	Excluded	Cytoplasm and nucleus	0.06
Q55AI9	DDB_G0271836	Excluded	Cytoplasm and nucleus	0.06
Q553H6	DDB_G0275835	Excluded	Cytoplasm and nucleus	0.049
Q55GP3	DDB_G0267574	Excluded	Cytoplasm and nucleus	0.039
Q54QL3	DDB_G0283783	Excluded	Cytoplasm and nucleus	0.035
Q54F82	DDB_G0291019	Excluded	Cytoplasm	0.03
Q54F39	DDB_G0291135	Excluded	Cytoplasm and nucleus	0.026
Q86I47	DDB_G0275053	Excluded	Cytoplasm and nucleus	0.015
Q55FY3	DDB_G0267908	Excluded	Cytoplasm and nucleus	0.015
Q54C69	DDB_G0293126	Mitochondrial	Mitochondria	1.38
Q54WP1	DDB_G0279521	Mitochondrial	Mitochondria	1.241
Q54QN4	DDB_G0283731	Mitochondrial	Mitochondria	1.223
Q54FA9	DDB_G0291057	Mitochondrial	Mitochondria	1.203
Q551I4	DDB_G0276573	Mitochondrial	Mitochondria	1.19
Q55GJ5	DDB_G0267644	Mitochondrial	Mitochondria	1.133
Q55D19	DDB_G0269812	Mitochondrial	Mitochondria	1.118
Q54QA4	DDB_G0283973	Mitochondrial	Mitochondria	1.042
Q54H56	DDB_G0289695	Mitochondrial	Mitochondria	1.013
Q54UP6	DDB_G0280905	Mitochondrial	Mitochondria	1.011
Q54D52	DDB_G0292542	Mitochondrial	Mitochondria	0.842
Q54HU7	DDB_G0289215	Mitochondrial	Mitochondria	0.834
Q55CR4	DDB_G0269936	Mitochondrial	Mitochondria	0.821
Q54T08	DDB_G0282063	Mitochondrial	Mitochondria	0.641
Q54DN9	DDB_G0292108	Mitochondrial	Mitochondria	0.526
Q54ES4	DDB_G0291366	Mitochondrial	Mitochondria	0.525
Q54QP9	DDB_G0283703	Mitochondrial	Mitochondria	0.52
Q54SI4	DDB_G0282449	Mitochondrial	Mitochondria	0.52
Q55A40	DDB_G0272358	Mitochondrial	Mitochondria	0.507
Q75K17	DDB_G0275457	Mitochondrial	Mitochondria	0.504
Q54GF1	DDB_G0290201	Mitochondrial	Mitochondria	0.502
Q54WE8	DDB_G0279697	Mitochondrial	Mitochondria	0.5
Q54F06	DDB_G0291181	Mitochondrial	Mitochondria	0.495
Q54WJ1	DDB_G0279627	Mitochondrial	Mitochondria	0.492
Q7KWW3	DDB_G0276789	Mitochondrial	Mitochondria	0.438
Q54K52	DDB_G0287603	Mitochondrial	Mitochondria	0.426
Q54RW4	DDB_G0282875	Mitochondrial	Mitochondria	0.421
Q556H6	DDB_G0272648	Mitochondrial	Mitochondria	0.418
Q86KA4	DDB_G0274401	Mitochondrial	Mitochondria	0.407
Q54N98	DDB_G0285379	Mitochondrial	Mitochondria	0.383
Q54IA1	DDB_G0288901	Mitochondrial	Mitochondria	0.349
Q54NM3	DDB_G0285143	Mitochondrial	Mitochondria	0.345
Q54SL9	DDB_G0282389	Mitochondrial	Mitochondria	0.344
Q54YY2	DDB_G0278013	Mitochondrial	Mitochondria	0.308
Q54R07	DDB_G0283455	Mitochondrial	Mitochondria	0.225
Q54XM1	DDB_G0278857	Partial mitochondrial	Puncta	1.171
Q54KR0	DDB_G0287161	Partial mitochondrial	Puncta	0.45
Q551M9	DDB_G0276537	Partial mitochondrial	Cytoplasm	0.39
Q75JI5	DDB_G0276099	Partial mitochondrial	Cytoplasm	0.384
Q55GG9	DDB_G0267680	Partial mitochondrial	Puncta	0.368
Q54U30	DDB_G0281345	Partial mitochondrial	Puncta	0.335
Q86HD0	DDB_G0280829	Partial mitochondrial	Cytoplasm	0.277
Q54VH1	DDB_G0280335	Partial mitochondrial	Puncta	0.23
Q54H98	DDB_G0289607	Partial mitochondrial	Cytoplasm and nucleus	0.221
Q55EM4	DDB_G0268828	Partial mitochondrial	Puncta	0.217
Q86HC5	DDB_G0275677	Partial mitochondrial	Puncta	0.181
Q54FY0	DDB_G0290539	Partial mitochondrial	Cytoplasm and nucleus	0.18
Q86K78	DDB_G0277181	Partial mitochondrial	Puncta	0.146
Q54G76	DDB_G0290335	Partial mitochondrial	Cytoplasm	0.099
Q54C13	DDB_G0293206	Partial mitochondrial	Cytoplasm and nucleus	0.086
Q54JZ4	DDB_G0287721	Partial mitochondrial	Puncta	0.084
Q55AL0	DDB_G0271764	Partial mitochondrial	Cytoplasm	0.081
Q54SH6	DDB_G0282463	Partial mitochondrial	Cytoplasm	0.042
Q55CK0	DDB_G0269758
Q54EE6	DDB_G0269824
Q55D11	DDB_G0270026
Q54E57	DDB_G0270432
Q555E3	DDB_G0271386
Q55BN2	DDB_G0271900
Q55D76	DDB_G0272000
Q54HJ3	DDB_G0274907
Q54K01	DDB_G0275921
Q54L39	DDB_G0278699
Q86I83	DDB_G0282001
Q86AH0	DDB_G0286205
Q54XY5	DDB_G0286921
Q55BC2	DDB_G0287709
Q54M52	DDB_G0289413
Q54T51	DDB_G0291546
Q552R6	DDB_G0291792

## Sheet: Table S6
Table S6. Classifications of the mitochondrial protein compendium. Biological process classifications were determined by PANTHER biological process or PANTHER family of the D. discoideum protein, or of the H. sapiens protein. Homologs of the D. discoideum proteins were established by HMMER alone (best homolog) or by HMMER and BlastP (D. purpureum whole proteome, R. prowazekii whole proteome, S. c…
B0G0Z7	Proteomics	Beta-lactamase family protein	SERINE BETA-LACTAMASE-LIKE PROTEIN LACTB, MITOCHONDRIAL (PTHR46520:SF1)		Lipid metabolism	F0ZIR2	F0ZIR2	Q9ZDR6			P83111	P83111
C7G004	Proteomics	Heat shock protein DnaJ family protein	DNAJ HOMOLOG SUBFAMILY C MEMBER 3 (PTHR24074:SF29)		Protein maturation & folding	F0ZFC1	F0ZFC1	Q9ZDY0	P40358	P39102	Q96EY1	Q9H3Z4
P0C8Z6	Proteomics	Putative neugrin-like protein DDB_G0288135	NEUGRIN (PTHR13475:SF3)	biological_process(GO:0008150)	Development	F0ZBH9	F0ZBH9		P40156	P40156	Q9NPE2	Q9NPE2
Q1ZXC3	Proteomics	Aminotransferase class-III	AMINOTRANSFERASE CLASS-III (PTHR43094:SF1)	biological_process(GO:0008150)	Amino acid metabolism	F0ZNV4	F0ZNV4		P07991	P18544	P04181	P04181
Q1ZXN5	Proteomics	L51_S25_CI-B8 domain-containing protein	NADH DEHYDROGENASE [UBIQUINONE] 1 ALPHA SUBCOMPLEX SUBUNIT 2 (PTHR12878:SF0)		Respiratory chain subunits	A0A151Z8C2	F0Z8R4				O43678	O43678
Q54BM3	Proteomics	Mitochondrial substrate carrier family protein G (Solute carrier family 25 member 20 homolog A)	MITOCHONDRIAL SUBSTRATE CARRIER FAMILY PROTEIN G (PTHR45624:SF24)		Carriers & channels	F0ZBC0	F0ZBC0		P32331	P32331	O43772	O43772
Q54CB8	Proteomics	Uncharacterized protein	SUBFAMILY NOT NAMED (PTHR47958:SF28)		Ribo. & translation	A0A151I2Y5	F0ZI46	Q9ZCQ0	P24783	P15424	Q9NUL7	P17844
Q54CQ1	Proteomics	Uncharacterized protein	AFG1-LIKE ATPASE (PTHR12169:SF6)	biological_process(GO:0008150)	Protein degradation	F1A412	F1A412	Q9ZDV7	P32317	P32317	Q8WV93	Q8WV93
Q54CY8	Proteomics	OBG-type G domain-containing protein	OBG-TYPE G DOMAIN-CONTAINING PROTEIN (PTHR23305:SF18)		Ribo. & translation	F1A390	F1A390	Q9ZCV5	P38219	P38746	A4D1E9	Q9NTK5
Q54D03	Proteomics	Uncharacterized protein	SUBFAMILY NOT NAMED (PTHR42820:SF5)		Lipid metabolism	F0Z8T3	F0Z8T3	P50941	P32573		Q92506	P15428
Q54DF5	Proteomics	HIT domain-containing protein	HISTIDINE TRIAD NUCLEOTIDE-BINDING PROTEIN 3 (PTHR12486:SF5)		DNA related processes	F0ZYK3	F0ZYK3				Q9NQE9	Q9NQE9
Q54EX7	Proteomics	Glutaredoxin-like protein	GLUTAREDOXIN-LIKE PROTEIN (PTHR10293:SF62)		Cellular response to stress	A0A1S3DSJ5	F0ZPC7	Q9ZDW1	Q02784	Q02784	Q9NS18	Q9NS18
Q54F95	Proteomics	PHB domain-containing protein	STOMATIN-LIKE PROTEIN 1 (PTHR10264:SF19)		Regulation & signaling	A0A3M6T778	F0ZZN2	Q9ZDK0	P40961	P40961	P27105	Q8TAV4
Q54G09	Proteomics	DUF1279 domain-containing protein	PROTEIN FAM210B, MITOCHONDRIAL (PTHR21377:SF0)		Cellular response to stress	F0ZC32	F0ZC32				Q96KR6	Q96KR6
Q54G84	Proteomics	Uncharacterized protein	BOLA-LIKE PROTEIN 1 (PTHR46229:SF2)	biological_process(GO:0008150)	Other regulation of gene expression	F0ZN13	F0ZN13	Q9ZDT0	Q3E793	Q3E793	Q9Y3E2	Q9Y3E2
Q54G88	Proteomics	MRP-L46 domain-containing protein	39S RIBOSOMAL PROTEIN L46, MITOCHONDRIAL (PTHR13124:SF12)		Ribo. & translation	F0ZUJ8	F0ZUJ8		P36528	P36528	Q9H2W6	Q9H2W6
Q54GC2	Proteomics	Nudix hydrolase domain-containing protein	NUCLEOSIDE DIPHOSPHATE-LINKED MOIETY X MOTIF 19 (PTHR12318:SF0)		Lipid metabolism	F1A1E5	F1A1E5				A8MXV4	A8MXV4
Q54I58	Proteomics	Protein NipSnap homolog	PROTEIN NIPSNAP (PTHR21017:SF17)	biological_process(GO:0008150)	Other	A0A151ZCF3	F0ZVN8				Q9BPW8	Q9BPW8
Q54II4	Proteomics	Reticulon-4-interacting protein 1 homolog, mitochondrial	PROTEIN AST1-RELATED (PTHR43482:SF1)		Development	F1A2F2	F1A2F2		P35183	P07246	Q8WWV3	Q8WWV3
Q54IY2	Proteomics	Uncharacterized protein	NAD(P)-BINDING ROSSMANN-FOLD SUPERFAMILY PROTEIN (PTHR24320:SF124)		Development	F1A0P6	F1A0P6		Q08651	Q08651	Q8NBN7	A0PJE2
Q54JB6	Proteomics	MOSC domain-containing protein	MOSC DOMAIN-CONTAINING PROTEIN (PTHR14237:SF19)		Other	F0ZT98	F0ZT98				Q5VT66	Q5VT66
Q54JK6	Proteomics	DUF155 domain-containing protein	SPORULATION PROTEIN RMD1 (PTHR16255:SF15)		Ribo. & translation	F0ZSV2	F0ZSV2	Q9ZD80	Q03441	Q05648	Q9NWS8	Q9NWS8
Q54JV7	Proteomics	PPR_long domain-containing protein	PPR_LONG DOMAIN-CONTAINING PROTEIN (PTHR47932:SF44)		Other regulation of gene expression	F0ZRW7	F0ZRW7				O75127	O75127
Q54KY9	Proteomics	Uncharacterized protein	HALOACID DEHALOGENASE-LIKE HYDROLASE DOMAIN-CONTAINING PROTEIN 3 (PTHR46191:SF2)		Other	F0ZLA2	F0ZLA2		Q04223	Q04223	Q9BSH5	Q9BSH5
Q54NC1	Proteomics	NADH-cytochrome b5 reductase 1 (EC 1.6.2.2)	NADH-CYTOCHROME B5 REDUCTASE-LIKE (PTHR19370:SF184)		Respiratory chain subunits	F0ZB34	F0ZB34		P38626	P36060	P00387	Q9UHQ9
Q54NX3	Proteomics	Thioredoxin domain-containing protein	THIOREDOXIN, MITOCHONDRIAL (PTHR43601:SF3)		Cellular response to stress	A0A388KGT8	F0ZY07	Q9ZEE0	P22803	P22217	Q99757	Q99757
Q54NZ8	Proteomics	Isochorismatase family protein 1B	ISOCHORISMATASE DOMAIN-CONTAINING PROTEIN 2 (PTHR14119:SF3)		Protein degradation	A0A0N4W6I8	F0ZSX4				Q96AB3	Q96AB3
Q54PL1	Proteomics	Uncharacterized protein	3-OXOACYL-(ACYL-CARRIER-PROTEIN) REDUCTASE (AFU_ORTHOLOGUE AFUA_6G11210) (PTHR43180:SF66)		Lipid metabolism	A0A0E0QCD4	F0ZQE9	P50941	Q02207	P40471	Q92506	Q9BUT1
Q54PT6	Proteomics	Electron transfer flavoprotein regulatory factor 1 homolog (LYR motif-containing protein 5)	ELECTRON TRANSFER FLAVOPROTEIN REGULATORY FACTOR 1 (PTHR21024:SF0)	biological_process(GO:0008150)	Respiratory chain assembly	F0ZY70	F0ZY70				Q6IPR1	Q6IPR1
Q54PV9	Proteomics	DnaJ homolog subfamily C member 11 homolog	DNAJ HOMOLOG SUBFAMILY C MEMBER 11 HOMOLOG (PTHR24074:SF2)	biological_process(GO:0008150)	Morphology & dynamics	F0ZGK0	F0ZGK0	Q9ZDY0	P25491	P39102	Q9NVH1	Q9NVH1
Q54Q52	Proteomics	Uncharacterized protein	OXIDOREDUCTASE, SHORT CHAIN DEHYDROGENASE/REDUCTASE FAMILY (AFU_ORTHOLOGUE AFUA_5G14000) (PTHR43431:SF1)	biological_process(GO:0008150)	Lipid metabolism	F0ZE65	F0ZE65	P50941	P40471	P40471	Q8N4T8	Q8N4T8
Q54Q67	Proteomics	Uncharacterized protein	SUBFAMILY NOT NAMED (PTHR45622:SF36)		Morphology & dynamics	F0ZLT4	F0ZLT4		P21827	Q08023	Q96I51	O95199
Q54QK2	Proteomics	AB hydrolase-1 domain-containing protein	PROTEIN ABHD11 (PTHR46118:SF4)			F0ZNV5	F0ZNV5		P53219	P53219	Q8NFV4	Q8NFV4
Q54S91	Proteomics	Uncharacterized protein	C5ORF35 (PTHR33524:SF1)		Regulation & signaling	F0ZUN8	F0ZUN8				Q8NE22	Q8NE22
Q54T58	Proteomics	LYR motif-containing protein 1	LYR MOTIF-CONTAINING PROTEIN 1 (PTHR14273:SF0)	biological_process(GO:0008150)		F0Z772	F0Z772				O43325	O43325
Q54T75	Proteomics	MaoC-like domain-containing protein	HYDROXYACYL-THIOESTER DEHYDRATASE TYPE 2, MITOCHONDRIAL-RELATED (PTHR43437:SF3)		Lipid metabolism	F1A2F8	F1A2F8				P86397	P86397
Q54TK2	Proteomics	Uncharacterized protein	28S RIBOSOMAL PROTEIN S29, MITOCHONDRIAL (PTHR12810:SF0)		Ribo. & translation	A0A151ZEN3			Q01163	Q01163	P51398	P51398
Q54TR3	Proteomics	Uncharacterized protein	39S RIBOSOMAL PROTEIN L28, MITOCHONDRIAL (PTHR13528:SF2)		Ribo. & translation	F0ZCW1	F0ZCW1	Q9ZE48	P36525	P36525	Q13084	Q13084
Q54TR7	Proteomics	Dihydrolipoamide acetyltransferase component of pyruvate dehydrogenase complex (EC 2.3.1.-)	LIPOAMIDE ACYLTRANSFERASE COMPONENT OF BRANCHED-CHAIN ALPHA-KETO ACID DEHYDROGENASE COMPLEX, MITOCHONDRIAL (PTHR43178:SF5)		Amino acid metabolism	F0ZCV9	F0ZCV9	Q9ZD20	P19262	P19262	P11182	P11182
Q54V95	Proteomics	Uncharacterized protein	PEPTIDYL-TRNA HYDROLASE-RELATED (PTHR17224:SF1)		tRNA related processes	D3BI18	F1A147	Q9ZCV4			Q86Y79	Q86Y79
Q54W18	Proteomics	NAD-dependent epimerase/dehydratase family protein	EPIMERASE FAMILY PROTEIN SDR39U1 (PTHR11092:SF0)		Amino acid metabolism	F1A0E6	F1A0E6				Q9NRG7	Q9NRG7
Q54W88	Proteomics	Isovaleryl-CoA dehydrogenase, mitochondrial	ISOVALERYL-COA DEHYDROGENASE, MITOCHONDRIAL (PTHR43884:SF12)		Fe/S protein biosynthesis	F0ZMZ5	F0ZMZ5				P26440	P26440
Q54WJ1	Proteomics	Uncharacterized protein				F0ZCV3	F0ZCV3				Q9HD34	Q9HD34
Q54X39	Proteomics	Uncharacterized protein			Other	F0ZE40	F0ZE40				Q86Y79	Q86Y79
Q54XH7	Proteomics	DUF4460 domain-containing protein	DUF4460 DOMAIN-CONTAINING PROTEIN (PTHR31596:SF8)			F0ZNB8	F0ZNB8				Q8N3R3	Q8N3R3
Q54XX9	Proteomics	PXMP2/4 family protein 2	PXMP2/4 FAMILY PROTEIN 2-RELATED (PTHR11266:SF112)	biological_process(GO:0008150)	Cellular response to stress	D3BJS0	F0ZYG2		Q06563	Q06563	P39210	P39210
Q54Y48	Proteomics	AB hydrolase-1 domain-containing protein	AB HYDROLASE-1 DOMAIN-CONTAINING PROTEIN (PTHR46118:SF2)			F0ZQV5	F0ZQV5	Q9ZDI5	P53219	P53219	Q8NFV4	Q8NFV4
Q54YY9	Proteomics	MOSC domain-containing protein	MOSC DOMAIN-CONTAINING PROTEIN (PTHR14237:SF59)		Other	F1A082	F0ZZY1				Q5VT66	Q5VT66
Q54ZD0	Proteomics	Probable peptidyl-tRNA hydrolase 2 (PTH 2) (EC 3.1.1.29)	PEPTIDYL-TRNA HYDROLASE 2, MITOCHONDRIAL (PTHR12649:SF11)		tRNA related processes	F1A182	F1A182		P34222	P34222	Q9Y3E5	Q9Y3E5
Q54ZX5	Proteomics	PXMP2/4 family protein 1	PXMP2/4 FAMILY PROTEIN 1 (PTHR11266:SF103)	biological_process(GO:0008150)	Ribo. & translation	F0ZT09	F0ZT09		Q06563	Q06563	Q567V2	Q567V2
Q551V0	Proteomics	Aldehyde dehydrogenase	ALDEDH DOMAIN-CONTAINING PROTEIN (PTHR11699:SF65)		Other	F0ZJW9	F0ZJW9		P46367	P46367	P49189	P00352
Q555C8	Proteomics	Monothiol glutaredoxin-5, mitochondrial	GLUTAREDOXIN-3-RELATED (PTHR10293:SF16)	biological_process(GO:0008150)	Fe/S protein biosynthesis	A0A1S3DSJ5	F0Z7P6	O05957	Q02784	Q02784	Q86SX6	Q86SX6
Q556J9	Proteomics	SURF1-like protein	SURFEIT LOCUS PROTEIN 1 (PTHR23427:SF2)		Respiratory chain assembly	A0A151ZAY9			P53266	P53266	Q15526	Q15526
Q556S5	Proteomics	Short-chain dehydrogenase/reductase family protein	SHORT-CHAIN DEHYDROGENASE/REDUCTASE FAMILY PROTEIN (PTHR43391:SF34)		Development	A0A1J1IAV7	F0ZH49		Q08651	Q08651	Q8NBN7	Q8TC12
Q55BA6	Proteomics	Uncharacterized protein	METHYLMALONIC ACIDURIA TYPE A PROTEIN, MITOCHONDRIAL (PTHR23408:SF3)		Lipid metabolism	F0ZC03	F0ZC03				Q8IVH4	Q8IVH4
Q55C31	Proteomics	Uncharacterized protein	REGULATOR OF CHROMOSOME CONDENSATION (PTHR45982:SF1)		Morphology & dynamics	F0ZKG9	F0ZKG9		P21827		Q96I51	Q9UGK8
Q55CJ9	Proteomics	Aldehyde dehydrogenase	ALDEDH DOMAIN-CONTAINING PROTEIN (PTHR42991:SF1)		Energy metabolism	F0ZCS6	F0ZCS6		P38067	P40047	P05091	O94788
Q55CK8	Proteomics	Uncharacterized protein	OXIDOREDUCTASE, SHORT-CHAIN DEHYDROGENASE/REDUCTASE FAMILY (AFU_ORTHOLOGUE AFUA_5G02870) (PTHR43639:SF1)		Lipid metabolism	F0ZCT4	F0ZCT4	P50941	Q07530	P40471	Q6IAN0	Q06136
Q55CN3	Proteomics	Uncharacterized protein	RNA HELICASE (PTHR47960:SF1)		Ribo. & translation	F0ZIR3	F0ZIR3	Q9ZCQ0	Q12389	P15424	Q9NUL7	Q9H0S4
Q55CR4	Proteomics	ANK_REP_REGION domain-containing protein			Lipid metabolism	W4Z7X2	F0ZC07	Q9ZCL3	P50086		Q9BXW6	P16157
Q55CV9	Proteomics	CaiB/baiF CoA-transferase family protein DDB_G0269880 (EC 2.-.-.-)	B BOX-TYPE DOMAIN-CONTAINING PROTEIN-RELATED (PTHR16148:SF19)		Other regulation of gene expression	F0ZAR7	F0ZAR7				Q9HAC7	Q9HAC7
Q55D22	Proteomics	MOSC domain-containing protein	MOSC DOMAIN-CONTAINING PROTEIN (PTHR14237:SF59)		Other	F0ZZY1	F0ZZY1				Q969Z3	Q969Z3
Q55E52	Proteomics	FAD-binding PCMH-type domain-containing protein	D-2-HYDROXYGLUTARATE DEHYDROGENASE, MITOCHONDRIAL (PTHR43716:SF1)		Energy metabolism	A0A0W8CWX8	F1A1A1		P46681	P46681	Q8N465	Q8N465
Q55E82	Proteomics	Uncharacterized protein	CARBONYL REDUCTASE FAMILY MEMBER 4 (PTHR42760:SF117)		Lipid metabolism	A0A103YDB1	F0ZI12	Q9ZEB0	P32573	P35731	Q8N4T8	Q8N4T8
Q55EJ5	Proteomics	RING-type domain-containing protein	RING-TYPE DOMAIN-CONTAINING PROTEIN (PTHR14879:SF5)		Morphology & dynamics	F0ZEI7	F0ZEI7				Q969V5	Q96P09
Q55ER6	Proteomics	G domain-containing protein	MITOCHONDRIAL RIBOSOME-ASSOCIATED GTPASE 1 (PTHR45782:SF4)		Ribo. & translation	F0ZXD2	F0ZXD2	Q9ZE30	Q03151	Q03151	Q9BT17	Q9BT17
Q55FL0	Proteomics	Uncharacterized protein	PEROXISOMAL MEMBRANE PROTEIN 4 (PTHR15460:SF3)	biological_process(GO:0008150)	Protein import & biogenesis	F0Z906	F0Z906				Q9Y6I8	Q9Y6I8
Q55GD7	Proteomics	Uncharacterized protein	CDGSH IRON-SULFUR DOMAIN-CONTAINING PROTEIN 3, MITOCHONDRIAL (PTHR46491:SF3)		Fe/S protein biosynthesis	F0ZJK1	F0ZJK1				P0C7P0	P0C7P0
Q55GI5	Proteomics	L-2-hydroxyglutarate dehydrogenase, mitochondrial (EC 1.1.99.2)	L-2-HYDROXYGLUTARATE DEHYDROGENASE, MITOCHONDRIAL (PTHR43104:SF2)			A0A016S6D3	F0ZLQ4				Q9H9P8	Q9H9P8
Q55GN4	Proteomics	Amino_oxidase domain-containing protein	AMINO_OXIDASE DOMAIN-CONTAINING PROTEIN (PTHR42923:SF17)		Regulation & signaling	F0ZLP3	F0ZLP3				P21397	P21397
Q55GN7	Proteomics	Uncharacterized protein	SUBFAMILY NOT NAMED (PTHR22870:SF420)		Morphology & dynamics	R7FMF3	F0ZW67		P21827	Q08023	Q96I51	O95714
Q75JC5	Proteomics	Uncharacterized protein	SHORT-CHAIN DEHYDROGENASE/REDUCTASE FAMILY PROTEIN (PTHR43391:SF5)			F0ZQ42	F0ZQ42	P50941	Q05016		Q3SXM5	Q7Z5P4
Q75JG3	Proteomics	Tr-type G domain-containing protein	TR-TYPE G DOMAIN-CONTAINING PROTEIN (PTHR42908:SF25)		Ribo. & translation	F1A2K9	F1A2K9	Q9ZDR2	P46943	P46943	Q8N442	Q8N442
Q75JQ5	Proteomics	Sulfhydryl oxidase (EC 1.8.3.2)	FAD-LINKED SULFHYDRYL OXIDASE ALR (PTHR12645:SF0)		Development	F0ZHR0	F0ZHR0		P27882	P27882	P55789	P55789
Q86AE2	Proteomics	Pyridine nucleotide-disulphide oxidoreductase, NAD-binding region domain-containing protein	EXTERNAL NADH-UBIQUINONE OXIDOREDUCTASE 1, MITOCHONDRIAL-RELATED (PTHR43706:SF3)		Other	F0ZBY4	F0ZBY4		P40215	P40215	Q96NN9	Q96NN9
Q86HT3	Proteomics	BolA-like protein DDB_G0274439	BOLA-LIKE PROTEIN 3 (PTHR46188:SF1)	biological_process(GO:0008150)	Protein maturation & folding	F0Z7J9	F0Z7J9		P39724	P39724	Q53S33	Q53S33
Q8MYE6	Proteomics	MOSC domain-containing protein	MOSC DOMAIN-CONTAINING PROTEIN (PTHR14237:SF19)			F0ZT98	F0ZT98				Q969Z3	Q969Z3
Q8T131	Proteomics	Uncharacterized protein	PROPIONYL-COA CARBOXYLASE BETA CHAIN, MITOCHONDRIAL (PTHR43842:SF2)		Lipid metabolism	F0ZT19	F0ZT19	Q9ZCU2	P32874	P32874	P05166	P05166
Q9GPS1	Proteomics	Complex III assembly factor LYRM7 (LYR motif-containing protein 7)	COMPLEX III ASSEMBLY FACTOR LYRM7 (PTHR46749:SF1)	biological_process(GO:0008150)	Respiratory chain assembly	A0A152A8K0					Q5U5X0	Q5U5X0
A9CLV7	Proteomics	ATPase subunit 8			Respiratory chain subunits	D3BGR9
A9CLV8	Proteomics	ATPase subunit 4			Respiratory chain subunits	A0A1H7QB00
B0G0Y7	Proteomics	Uncharacterized protein			Other	F1A5X5	F1A5X5
B0G112	Proteomics	Beta-lactamase family protein	ZINC PHOSPHODIESTERASE ELAC PROTEIN 2 (PTHR12553:SF49)	biological_process(GO:0008150);mitochondrial tRNA 3'-trailer cleavage, endonucleolytic(GO:0072684)	tRNA related processes	F0ZT10	F0ZER9		P36159	P36159	Q9BQ52	Q9BQ52
B0G117	Proteomics	Thiamine pyrophosphate-binding enzyme family protein	2-HYDROXYACYL-COA LYASE 2 (PTHR18968:SF166)	isoleucine biosynthetic process(GO:0009097);valine biosynthetic process(GO:0009099)	Amino acid metabolism	F0Z6C0	F0Z6C0		P39994	P07342		A1L0T0
B0G119	Proteomics	Peptidylprolyl isomerase (EC 5.2.1.8)	12 KDA FK506-BINDING PROTEIN-RELATED (PTHR10516:SF443)	protein peptidyl-prolyl isomerization(GO:0000413);chaperone-mediated protein folding(GO:0061077)	Protein maturation & folding	A0A0E0JZY0	F0ZKH7		P20081		Q96AY3	P26885
B0G143	Proteomics	Mitochondrial substrate carrier family protein ucpB (Solute carrier family 25 member 30 homolog) (Uncoupler protein B)	MITOCHONDRIAL SUBSTRATE CARRIER FAMILY PROTEIN UCPB (PTHR45618:SF52)	mitochondrial transport(GO:0006839)	Carriers & channels	A0A232FN93	F0ZJ94		P32332	P32332	Q5SVS4	Q5SVS4
B0G159	Proteomics	Mitochondrial substrate carrier family protein C	CALCIUM-BINDING MITOCHONDRIAL CARRIER PROTEIN SCAMC-2 (PTHR24089:SF57)	ATP transport(GO:0015867);transmembrane transport(GO:0055085)	Carriers & channels	A0A152A889	F0ZJB6		Q12251	Q12251	Q6NUK1	Q6NUK1
B0G168	Proteomics	Starvation responsive small protein A		aggregation involved in sorocarp development [GO:0031152]; cell aggregation [GO:0098743]; non-reproductive fruiting body development [GO:0090702]; regulation of transcription, DNA-templated [GO:0006355]; response to starvation [GO:0042594]; sorocarp morphogenesis [GO:0031288]; sporulation resulting in formation of a cellular spore [GO:0030435]	Development	A0A151ZKU5	F0ZL28
B0G178	Proteomics	Uncharacterized protein	SUBFAMILY NOT NAMED (PTHR31630:SF8)	biological_process(GO:0008150)		F0ZGN2	F0ZKI3
B0G189	Proteomics	Translation factor GUF1 homolog, mitochondrial (EC 3.6.5.-) (Elongation factor 4 homolog) (EF-4) (GTPase GUF1 homolog) (Ribosomal back-translocase)	TRANSLATION FACTOR GUF1, MITOCHONDRIAL (PTHR43512:SF4)	translation(GO:0006412);positive regulation of translation(GO:0045727)	Ribo. & translation	F1A3D1	F1A3D1	Q9ZDQ1	P46943	P46943	Q8N442	Q8N442
B0G196	Proteomics	SET domain-containing protein	MYND-TYPE DOMAIN-CONTAINING PROTEIN (PTHR12197:SF251)	response to bacterium(GO:0009617);histone lysine methylation(GO:0034968)	DNA related processes	F0Z9L8	F0Z9L8		Q12529			Q6GMV2
B0M0Q3	Proteomics	Uncharacterized protein			Other	F0ZHQ9	F0ZHQ9
C7FZZ8	Proteomics	Phosphatidylserine decarboxylase (EC 4.1.1.65)	PHOSPHATIDYLSERINE DECARBOXYLASE PROENZYME, MITOCHONDRIAL (PTHR10067:SF6)	phosphatidylethanolamine biosynthetic process(GO:0006646);phospholipid biosynthetic process(GO:0008654)	Lipid metabolism	F0ZNH9	F0ZNH9		P39006	P39006	Q9UG56	Q9UG56
C7G039	Proteomics	Mrr_cat domain-containing protein		biological_process(GO:0008150);DNA restriction-modification system(GO:0009307);nucleic acid phosphodiester bond hydrolysis(GO:0090305)	Other	F1A0J4	F1A0J4
C7G061	Proteomics	Peptidase M3A and M3B domain-containing protein	MITOCHONDRIAL INTERMEDIATE PEPTIDASE (PTHR11804:SF8)	proteolysis(GO:0006508);peptide metabolic process(GO:0006518);protein processing involved in protein targeting to mitochondrion(GO:0006627)	Protein degradation	F0ZBK2	F0ZBK2		P35999	P35999	Q99797	Q99797
C7G062	Proteomics	Mitochondrial substrate carrier family protein	MITOCHONDRIAL SUBSTRATE CARRIER FAMILY PROTEIN (PTHR45671:SF6)	phosphate ion transmembrane transport(GO:0035435);transmembrane transport(GO:0055085)	Carriers & channels	F0ZBK1	F0ZBK1		P23641	P23641	Q00325	Q00325
O21032	Proteomics	60S ribosomal protein L16, mitochondrial	39S RIBOSOMAL PROTEIN L16, MITOCHONDRIAL (PTHR12220:SF13)	translation(GO:0006412);mitochondrial translation(GO:0032543)	Ribo. & translation	RL16		Q9ZCR2
O21033	Proteomics	60S ribosomal protein L14, mitochondrial	54S RIBOSOMAL PROTEIN L38, MITOCHONDRIAL (PTHR11761:SF3)	translation(GO:0006412)	Ribo. & translation	W1QCI8		Q9ZCR5	P35996	P35996
O21034	Proteomics	Uncharacterized mitochondrial protein 30 (ORF188)
O21036	Proteomics	Ribosomal protein S8, mitochondrial	Universal ribosomal protein uS8 family	translation [GO:0006412]	Ribo. & translation	A0A067BBJ2
O21037	Proteomics	60S ribosomal protein L6, mitochondrial	REPLICATION FACTOR C SUBUNIT 1 (PTHR11655:SF14)	translation(GO:0006412)	Ribo. & translation	A0A1V2LZ52		Q9ZCS0	P32904	P32904
O21038	Proteomics	Ribosomal protein S13, mitochondrial	Universal ribosomal protein uS13 family	translation [GO:0006412]	Ribo. & translation	H6NS00
O21039	Proteomics	Uncharacterized mitochondrial protein 35 (ORF127) (Ribosomal protein S11)
O21042	Proteomics	Cytochrome c oxidase subunit 1+2 (EC 7.1.1.9) (Cytochrome c oxidase polypeptide I+II)	CYTOCHROME C OXIDASE SUBUNIT 1 (PTHR10422:SF18)	oxidative phosphorylation(GO:0006119);mitochondrial electron transport, cytochrome c to oxygen(GO:0006123);aerobic respiration(GO:0009060);electron transport coupled proton transport(GO:0015990);electron transport chain(GO:0022900);respiratory electron transport chain(GO:0022904)	Respiratory chain subunits	A7UG06		O54069	P00401	P00401	P00395	P00395
O21043	Proteomics	Intron-encoded DNA endonuclease ai2a (EC 3.1.-.-)	INTRON-ENCODED DNA ENDONUCLEASE AI2A-RELATED (PTHR37520:SF1)	intron homing(GO:0006314);nucleic acid phosphodiester bond hydrolysis(GO:0090305)	DNA related processes	A0A541AXK7	F0ZBY3		P03878	P03878
O21045	Proteomics	Probable intron-encoded endonuclease aI3 (EC 3.1.-.-) (Cox1/2 intron3 ORF)	INTRON-ENCODED ENDONUCLEASE AI3-RELATED (PTHR36181:SF2)	intron homing(GO:0006314);nucleic acid phosphodiester bond hydrolysis(GO:0090305)	DNA related processes	A0A541AXK9			P03881	P03881
O21047	Proteomics	NADH-ubiquinone oxidoreductase chain 4 (EC 7.1.1.2) (NADH dehydrogenase subunit 4)	NADH-UBIQUINONE OXIDOREDUCTASE CHAIN 4 (PTHR43507:SF1)	aerobic respiration(GO:0009060);electron transport coupled proton transport(GO:0015990);ATP synthesis coupled electron transport(GO:0042773)	Respiratory chain subunits	A0A2P6NHU9		Q9ZCG0			P03905	P03905
O21048	Proteomics	NADH-ubiquinone oxidoreductase chain 2 (EC 7.1.1.2) (NADH dehydrogenase subunit 2)	NADH-UBIQUINONE OXIDOREDUCTASE CHAIN 2 (PTHR22773:SF41)	electron transport chain(GO:0022900)	Respiratory chain subunits	W0DVV0		Q9ZD13			P03891	P03891
O21049	Proteomics	Cytochrome c oxidase subunit 3 (EC 7.1.1.9) (Cytochrome c oxidase polypeptide III)	CYTOCHROME C OXIDASE SUBUNIT 3 (PTHR11403:SF7)	mitochondrial electron transport, cytochrome c to oxygen(GO:0006123);aerobic respiration(GO:0009060);aerobic electron transport chain(GO:0019646);respiratory electron transport chain(GO:0022904);transmembrane transport(GO:0055085);proton transmembrane transport(GO:1902600)	Respiratory chain subunits	A0A4Q3DIC9		Q9ZDX3	P00420	P00420	P00414	P00414
O21050	Proteomics	Uncharacterized mitochondrial protein Mp05 (ORF447)		sexual reproduction [GO:0019953]	Other
O76740	Proteomics	Cytochrome c oxidase assembly protein	CYTOCHROME C OXIDASE ASSEMBLY PROTEIN COX15 HOMOLOG (PTHR23289:SF2)	heme A biosynthetic process(GO:0006784)	Respiratory chain assembly	F0ZHG6	F0ZHG6	Q9ZDR8	P40086	P40086	Q7KZN9	Q7KZN9
O97470	Proteomics	Mitochondrial substrate carrier family protein ancA (ADP,ATP carrier protein) (ADP/ATP translocase) (Adenine nucleotide translocator) (ANT)	ADP,ATP CARRIER PROTEIN-RELATED (PTHR45635:SF14)	ADP transport(GO:0015866);ATP transport(GO:0015867);transmembrane transport(GO:0055085);mitochondrial ADP transmembrane transport(GO:0140021);mitochondrial ATP transmembrane transport(GO:1990544)	Carriers & channels	A0A0L0C3V0	F1A2L4		P18239	P18239	P12235	P12235
P0C7B6	Proteomics	Type-1 glutamine synthetase 2 (Type-1 GS 2) (EC 6.3.1.2) (Type-1 glutamate--ammonia ligase 2)	TYPE-1 GLUTAMINE SYNTHETASE 2 (PTHR43785:SF13)	glutamine biosynthetic process(GO:0006542);nitrogen compound metabolic process(GO:0006807)	Amino acid metabolism	F0ZBK0	F0ZBK0	Q9ZD52				Q5TDP6
P0C7W5	Proteomics	Uncharacterized protein DDB_G0281707				F0Z6Y2	F0Z6Y2
P13231	Proteomics	Hisactophilin-1 (Histidine-rich actin-binding protein 1) (HS I)	HISACTOPHILIN-1-RELATED (PTHR33351:SF1)	actin filament polymerization(GO:0030041)	Other	F0Z7K8	F0Z7K8					Q16658
P20609	Proteomics	Cytochrome c oxidase subunit 7e (EC 7.1.1.9) (Cytochrome c oxidase polypeptide VIIe)		response to hypoxia [GO:0001666]	Cellular response to stress	D3BCT8	F0ZFD1
P22237	Proteomics	NADH-ubiquinone oxidoreductase subunit 9 (EC 7.1.1.2)	NADH DEHYDROGENASE [UBIQUINONE] IRON-SULFUR PROTEIN 3, MITOCHONDRIAL (PTHR10884:SF14)	electron transport chain(GO:0022900)	Respiratory chain subunits	B0X266		Q9ZDH3			O75489	O75489
P26310	Proteomics	Cytochrome c oxidase polypeptide 6, mitochondrial (Cytochrome c oxidase polypeptide VI)	Cytochrome c oxidase IV family	oxidative phosphorylation [GO:0006119]	Respiratory chain subunits	F0ZXE9	F0ZXE9
P29505	Proteomics	Cytochrome c oxidase subunit 5 (Cytochrome c oxidase polypeptide V)	CYTOCHROME C OXIDASE SUBUNIT 5B, MITOCHONDRIAL (PTHR10122:SF0)	oxidative phosphorylation(GO:0006119);mitochondrial electron transport, cytochrome c to oxygen(GO:0006123);response to bacterium(GO:0009617);proton transmembrane transport(GO:1902600)	Respiratory chain subunits	F0ZQN7	F0ZQN7		P04037	P04037		Q6P1L6
P30815	Proteomics	Cytochrome c oxidase subunit 4, mitochondrial (EC 7.1.1.9) (Cytochrome c oxidase polypeptide IV)			Respiratory chain subunits	F0ZU16	F0ZU16
P32253	Proteomics	Ras-like protein rasC (EC 3.6.5.2)	RAS-LIKE PROTEIN RASC (PTHR24070:SF251)	regulation of cell growth(GO:0001558);establishment or maintenance of cell polarity(GO:0007163);signal transduction(GO:0007165);adenylate cyclase-modulating G protein-coupled receptor signaling pathway(GO:0007188);Ras protein signal transduction(GO:0007265);positive regulation of cGMP-mediated signaling(GO:0010753);asexual reproduction(GO:0019954);actin cytoskeleton organization(GO:0030036);aggre…	Regulation & signaling	S8A4W9	F1A411		P01120	P01120	Q969Q5	P01116
P34093	Proteomics	Nucleoside diphosphate kinase, mitochondrial (NDK) (NDP kinase) (EC 2.7.4.6)	NUCLEOSIDE DIPHOSPHATE KINASE (PTHR11349:SF91)	nucleoside diphosphate phosphorylation(GO:0006165);GTP biosynthetic process(GO:0006183);UTP biosynthetic process(GO:0006228);CTP biosynthetic process(GO:0006241);nucleotide metabolic process(GO:0009117);nucleoside triphosphate biosynthetic process(GO:0009142);response to bacterium(GO:0009617);phosphorylation(GO:0016310)	Nucleotide metabolism	A0A1Y2CJH4	F1A2K7	Q9ZE91	P36010	P36010	Q13232	P22392
P34136	Proteomics	3-hydroxy-3-methylglutaryl-coenzyme A reductase 2 (HMG-CoA reductase 2) (EC 1.1.1.34)	3-HYDROXY-3-METHYLGLUTARYL-COENZYME A REDUCTASE 2 (PTHR10572:SF42)	lipid metabolic process(GO:0006629);steroid biosynthetic process(GO:0006694);cholesterol biosynthetic process(GO:0006695);steroid metabolic process(GO:0008202);cholesterol metabolic process(GO:0008203);isoprenoid biosynthetic process(GO:0008299);coenzyme A metabolic process(GO:0015936);sterol biosynthetic process(GO:0016126)	Lipid metabolism	F0ZER0	F0ZER0		P12684			P04035
P36413	Proteomics	Dihydrolipoyllysine-residue acetyltransferase component of pyruvate dehydrogenase complex, mitochondrial (EC 2.3.1.12) (Dihydrolipoamide acetyltransferase component of pyruvate dehydrogenase complex) (Pyruvate dehydrogenase complex component E2) (PDC-E2) (PDCE2)	DIHYDROLIPOYLLYSINE-RESIDUE ACETYLTRANSFERASE COMPONENT OF PYRUVATE DEHYDROGENASE COMPLEX, MITOCHONDRIAL-RELATED (PTHR23151:SF9)	acetyl-CoA biosynthetic process from pyruvate(GO:0006086);pyruvate metabolic process(GO:0006090);glycolytic process(GO:0006096);protein phosphopantetheinylation(GO:0018215)	Energy metabolism	F0ZCK0	F0ZCK0	Q9ZD20	P12695	P12695	P10515	P10515
P36967	Proteomics	Succinate--CoA ligase [ADP/GDP-forming] subunit alpha, mitochondrial (EC 6.2.1.4) (EC 6.2.1.5) (Succinyl-CoA synthetase subunit alpha) (SCS-alpha) (p36)	SUCCINATE--COA LIGASE [ADP/GDP-FORMING] SUBUNIT ALPHA, MITOCHONDRIAL (PTHR11117:SF2)	tricarboxylic acid cycle(GO:0006099);succinyl-CoA metabolic process(GO:0006104)	Energy metabolism	A0A152AA40	F1A3L4	O08371	P53598	P53598	P53597	P53597
P42526	Proteomics	Hisactophilin-2 (Histidine-rich actin-binding protein 2) (HS II)	HISACTOPHILIN-1-RELATED (PTHR33351:SF1)	response to acidic pH(GO:0010447)	Cellular response to stress	F0Z7K8	F0Z7K8					Q16658
P54872	Proteomics	Hydroxymethylglutaryl-CoA synthase A (HMG-CoA synthase A) (EC 2.3.3.10) (3-hydroxy-3-methylglutaryl coenzyme A synthase A)	HYDROXYMETHYLGLUTARYL-COA SYNTHASE A (PTHR43323:SF14)	acetyl-CoA metabolic process(GO:0006084);lipid metabolic process(GO:0006629);steroid biosynthetic process(GO:0006694);steroid metabolic process(GO:0008202);isoprenoid biosynthetic process(GO:0008299);farnesyl diphosphate biosynthetic process, mevalonate pathway(GO:0010142);sterol biosynthetic process(GO:0016126)	Energy metabolism	R1BNS0	F1A139		P54839		P54868	Q01581
P90520	Proteomics	DNA topoisomerase 2, mitochondrial (DNA topoisomerase II) (EC 5.6.2.2)	DNA TOPOISOMERASE 2, MITOCHONDRIAL (PTHR10169:SF49)	resolution of meiotic recombination intermediates(GO:0000712);sister chromatid segregation(GO:0000819);DNA metabolic process(GO:0006259);DNA topological change(GO:0006265)	DNA related processes	F0ZB94	F0ZB94	Q9ZDU7	P06786			Q02880
Q01501	Proteomics	Mitochondrial outer membrane protein porin (Voltage-dependent anion-selective channel protein) (VDAC)	GH26960P-RELATED (PTHR11743:SF70)	ion transport(GO:0006811);inorganic anion transport(GO:0015698);regulation of ion transmembrane transport(GO:0034765);transmembrane transport(GO:0055085);anion transmembrane transport(GO:0098656)	Carriers & channels	F1A5T8	F1A5T8
Q1ZXB5	Proteomics	Uncharacterized protein		biological_process(GO:0008150)		F0ZRD0	F0ZRD0
Q1ZXD4	Proteomics	Uncharacterized protein			Other	F0ZLR6	F0ZLR6
Q1ZXF1	Proteomics	Probable enoyl-CoA hydratase, mitochondrial (EC 4.2.1.17) (Enoyl-CoA hydratase 1) (Short-chain enoyl-CoA hydratase) (SCEH)	ENOYL-COA HYDRATASE, MITOCHONDRIAL (PTHR11941:SF54)	lipid metabolic process(GO:0006629);fatty acid metabolic process(GO:0006631);fatty acid beta-oxidation(GO:0006635)	Lipid metabolism	A0A0L0BYU8	F0ZH22	Q9ZCZ1	P28817	P28817	P30084	P30084
Q1ZXG5	Proteomics	DNA ligase (NAD(+)) (EC 6.5.1.2)	DNA LIGASE (NAD(+)) (PTHR23389:SF9)	DNA replication(GO:0006260);DNA ligation(GO:0006266);DNA repair(GO:0006281);cellular response to DNA damage stimulus(GO:0006974)	DNA related processes	F0ZLE7	F0ZLE7	Q9ZCK9
Q1ZXK7	Proteomics	AAA ATPase domain-containing protein	AAA DOMAIN-CONTAINING PROTEIN (PTHR45644:SF56)	protein targeting to mitochondrion(GO:0006626)	Protein import & biogenesis	A0A200RD59	F0ZX34	Q9ZEA2	P28737	P28737	Q8NBU5	Q8NBU5
Q1ZXP3	Proteomics	Probable cytochrome b-c1 complex subunit 6 (Ubiquinol-cytochrome c reductase complex subunit 6)	CYTOCHROME B-C1 COMPLEX SUBUNIT 6, MITOCHONDRIAL (PTHR15336:SF0)	mitochondrial electron transport, ubiquinol to cytochrome c(GO:0006122);aerobic respiration(GO:0009060)	Respiratory chain subunits	F0ZKM7	F0ZKM7
Q23883	Proteomics	NADH-ubiquinone oxidoreductase 49 kDa subunit (EC 7.1.1.2) (NADH dehydrogenase subunit 7)	NADH DEHYDROGENASE [UBIQUINONE] IRON-SULFUR PROTEIN 2, MITOCHONDRIAL (PTHR11993:SF10)	mitochondrial electron transport, NADH to ubiquinone(GO:0006120)	Respiratory chain subunits	A0A0B2UZN2		Q9ZDH4			O75306	O75306
Q23884	Proteomics	60S ribosomal protein L11, mitochondrial	39S RIBOSOMAL PROTEIN L11, MITOCHONDRIAL (PTHR11661:SF1)	translation(GO:0006412)	Ribo. & translation	A0A1E4TY96		Q9ZE24	P53875	P53875	Q9Y3B7	Q9Y3B7
Q23885	Proteomics	Uncharacterized mitochondrial protein 21 (ORF189)
Q23886	Proteomics	Ribosomal protein S12, mitochondrial (MRP-S12) (S12mt)	28S RIBOSOMAL PROTEIN S12, MITOCHONDRIAL (PTHR11652:SF1)	translation(GO:0006412)	Ribo. & translation	A0A4Q3DHK0	F0ZC53	P41082	P53732	P53732	O15235	O15235
Q23887	Proteomics	Ribosomal protein S7, mitochondrial (MRP-S7) (S7mt)	28S RIBOSOMAL PROTEIN S7, MITOCHONDRIAL (PTHR11205:SF19)	ribosomal small subunit assembly(GO:0000028);translation(GO:0006412)	Ribo. & translation	A0A1C3ZVQ3		P41081
Q23888	Proteomics	60S ribosomal protein L2, mitochondrial	54S RIBOSOMAL PROTEIN RML2, MITOCHONDRIAL (PTHR13691:SF5)	translation(GO:0006412);mitochondrial translation(GO:0032543)	Ribo. & translation	J9Z1A4	F0Z7K1	Q9ZCQ8	P32611	P32611	Q5T653	Q5T653
Q23889	Proteomics	Ribosomal protein S19, mitochondrial	37S RIBOSOMAL PROTEIN S19, MITOCHONDRIAL (PTHR11880:SF8)	ribosomal small subunit assembly(GO:0000028);translation(GO:0006412)	Ribo. & translation	A0A0G4PIB5		Q9ZCQ9	P53733	P53733
Q23890	Proteomics	ORF425
Q23891	Proteomics	ORF1740			Ribo. & translation	M2P9Z2
Q27564	Proteomics	Thymidine kinase 1 (TK1) (EC 2.7.1.21) (Calmodulin-binding protein ThyB)	THYMIDINE KINASE, CYTOSOLIC (PTHR11441:SF0)	nucleobase-containing compound metabolic process(GO:0006139);protein phosphorylation(GO:0006468);deoxyribonucleoside monophosphate biosynthetic process(GO:0009157);phosphorylation(GO:0016310);thymidine metabolic process(GO:0046104);DNA biosynthetic process(GO:0071897)	Nucleotide metabolism	F0ZSA2	F0ZSA2					P04183
Q34312	Proteomics	NADH-ubiquinone oxidoreductase 75 kDa subunit (EC 7.1.1.2) (Complex I-75kD) (CI-75kD)	NADH-UBIQUINONE OXIDOREDUCTASE 75 KDA SUBUNIT, MITOCHONDRIAL (PTHR11615:SF6)	ATP synthesis coupled electron transport(GO:0042773)	Respiratory chain subunits	A0A482W691		Q9ZCF6			P28331	P28331
Q34313	Proteomics	NADH-ubiquinone oxidoreductase chain 5 (EC 7.1.1.2) (NADH dehydrogenase subunit 5)	NADH-UBIQUINONE OXIDOREDUCTASE CHAIN 5 (PTHR42829:SF2)	electron transport coupled proton transport(GO:0015990);ATP synthesis coupled electron transport(GO:0042773)	Respiratory chain subunits	Q0P3F5		Q9ZCG1			P03915	P03915
Q37311	Proteomics	Cytochrome b (Complex III subunit 3) (Complex III subunit III) (Cytochrome b-c1 complex subunit 3) (Ubiquinol-cytochrome-c reductase complex cytochrome b subunit)	CYTOCHROME B (PTHR19271:SF16)	mitochondrial electron transport, ubiquinol to cytochrome c(GO:0006122);respiratory electron transport chain(GO:0022904)	Respiratory chain subunits	A0A2P6NHX0		O54070	P00163	P00163	P00156	P00156
Q37312	Proteomics	NADH-ubiquinone oxidoreductase chain 3 (EC 7.1.1.2) (NADH dehydrogenase subunit 3)	NADH-UBIQUINONE OXIDOREDUCTASE CHAIN 3 (PTHR11058:SF9)	electron transport chain(GO:0022900)	Respiratory chain subunits	C1KRI8		Q9ZDH1			P03897	P03897
Q37313	Proteomics	NADH-ubiquinone oxidoreductase chain 1 (EC 7.1.1.2) (NADH dehydrogenase subunit 1)	NADH-UBIQUINONE OXIDOREDUCTASE CHAIN 1 (PTHR11432:SF3)	aerobic respiration(GO:0009060);electron transport chain(GO:0022900)	Respiratory chain subunits	A0A418WBT0		Q9ZCF7			P03886	P03886
Q37314	Proteomics	NADH-ubiquinone oxidoreductase chain 6 (EC 7.1.1.2) (NADH dehydrogenase subunit 6)	NADH-UBIQUINONE OXIDOREDUCTASE CHAIN 6 (PTHR33269:SF17)	electron transport chain(GO:0022900)	Respiratory chain subunits	K8ENE2		Q9ZCG3
Q37315	Proteomics	ATP synthase subunit 9, mitochondrial (Lipid-binding protein)	ATPASE PROTEIN 9 (PTHR10031:SF0)	ion transport(GO:0006811);ATP synthesis coupled proton transport(GO:0015986);proton transmembrane transport(GO:1902600)	Respiratory chain subunits	A0A212FKT3		Q9ZEC2	P61829	P61829	P05496	P05496
Q4W6B5	Proteomics	Mitochondrial-processing peptidase subunit beta (EC 3.4.24.64) (Beta-MPP)	GH01077P (PTHR11851:SF149)	proteolysis(GO:0006508);protein processing involved in protein targeting to mitochondrion(GO:0006627);mitochondria-nucleus signaling pathway(GO:0031930)	Protein degradation	D3B6D9	F0ZET3	O05945	P10507	P10507	O75439	O75439
Q54B10	Proteomics	NADPH oxidoreductase A (EC 1.6.-.-)	NADPH OXIDOREDUCTASE A (PTHR19384:SF122)	multicellular organism development(GO:0007275);sorocarp development(GO:0030587)	Development	F0Z982	F0Z982		P16603	Q12181		P16435
Q54B20	Proteomics	Succinate dehydrogenase assembly factor 2, mitochondrial (SDH assembly factor 2) (SDHAF2)	SUCCINATE DEHYDROGENASE ASSEMBLY FACTOR 2, MITOCHONDRIAL (PTHR12469:SF2)	tricarboxylic acid cycle(GO:0006099);mitochondrial electron transport, succinate to ubiquinone(GO:0006121);biological_process(GO:0008150);protein-FAD linkage(GO:0018293);mitochondrial respiratory chain complex II assembly(GO:0034553)	Respiratory chain assembly	F0ZJZ4	F0ZJZ4	Q9ZCV9	Q08230	Q08230	Q9NX18	Q9NX18
Q54B21	Proteomics	Uncharacterized protein				F0ZJZ5	F0ZJZ5
Q54B22	Proteomics	Uncharacterized protein	DUF4206 DOMAIN-CONTAINING PROTEIN (PTHR45971:SF1)			F0ZJZ6	F0ZJZ6					Q5T6S3
Q54B26	Proteomics	Uncharacterized protein	MITOCHONDRIAL ASSEMBLY OF RIBOSOMAL LARGE SUBUNIT PROTEIN 1 (PTHR21043:SF0)	negative regulation of translation(GO:0017148);negative regulation of ribosome biogenesis(GO:0090071)	Ribo. & translation	F0ZWV5	F0ZWV5				Q96EH3	Q96EH3
Q54B42	Proteomics	Uncharacterized protein	TRAB DOMAIN-CONTAINING PROTEIN (PTHR21530:SF7)		Other	F0Z970	F0Z970
Q54B62	Proteomics	Uncharacterized protein	MITOCHONDRIAL GROUP I INTRON SPLICING FACTOR CCM1 (PTHR47942:SF63)		DNA related processes	A0A152A513	F0ZQ16
Q54B67	Proteomics	Mitochondrial substrate carrier family protein Z	SUCCINATE/FUMARATE MITOCHONDRIAL TRANSPORTER (PTHR45788:SF2)	fumarate transport(GO:0015741);succinate transport(GO:0015744);succinate transmembrane transport(GO:0071422)	Carriers & channels	F0ZQ11	F0ZQ11		P33303	P33303	Q9BQT8	Q9BQT8
Q54B68	Proteomics	Isocitrate dehydrogenase [NAD] regulatory subunit B, mitochondrial (EC 1.1.1.41)	ISOCITRATE DEHYDROGENASE [NAD] SUBUNIT BETA, MITOCHONDRIAL (PTHR11835:SF42)	tricarboxylic acid cycle(GO:0006099);isocitrate metabolic process(GO:0006102)	Energy metabolism	A0A3Q7HUE5	F0ZQ10	Q9ZDR0	P28834	P28834	P50213	P50213
Q54B71	Proteomics	Uncharacterized protein	ACTIVATOR OF C KINASE PROTEIN 1-RELATED (PTHR43628:SF1)	regulation of catalytic activity(GO:0050790)	Regulation & signaling	A0A397HNU7	F1A658		P34226			Q9UBV2
Q54B92	Proteomics	RNA12 domain-containing protein	RNA12 DOMAIN-CONTAINING PROTEIN (PTHR32198:SF3)	mitochondrial genome maintenance(GO:0000002)	DNA related processes	F0ZG56	F0ZG56					Q8NCM8
Q54BF6	Proteomics	Mitochondrial substrate carrier family protein N (Solute carrier family 25 member 3 homolog)	MITOCHONDRIAL PHOSPHATE CARRIER PROTEIN (PTHR45671:SF12)	phosphate ion transport(GO:0006817);phosphate ion transmembrane transport(GO:0035435);transmembrane transport(GO:0055085)	Carriers & channels	F4PSN1	F0ZWF1		P23641	P23641	Q00325	Q00325
Q54BH0	Proteomics	Uncharacterized protein	PROTEIN TOLL-RELATED (PTHR24365:SF537)	toll-like receptor signaling pathway(GO:0002224);immune response(GO:0006955)	Cellular response to stress	F1A2Y1	F1A2Y1
Q54BJ5	Proteomics	Uncharacterized protein	INNER MEMBRANE PROTEIN YECN (PTHR35814:SF1)		Other	F0Z6X5	F0Z6X5
Q54BN1	Proteomics	tRNA(Ile)-2-lysyl-cytidine synthase (EC 6.3.4.19) (tRNA(Ile)-lysidine synthetase)	TRNA(ILE)-LYSIDINE SYNTHASE-RELATED (PTHR43033:SF1)	tRNA processing(GO:0008033)	tRNA related processes	F0ZN99	F0ZN99	Q9ZEA3
Q54BR2	Proteomics	Uncharacterized protein	NADH DEHYDROGENASE [UBIQUINONE] IRON-SULFUR PROTEIN 5 (PTHR15224:SF1)	mitochondrial respiratory chain complex I assembly(GO:0032981)	Respiratory chain assembly	F0ZXR3	F0ZXR3
Q54BU5	Proteomics	Uncharacterized protein				F0ZWT1	F0ZWT1
Q54BW1	Proteomics	Putative uncharacterized protein DDB_G0293380	THUMP DOMAIN-CONTAINING PROTEIN 3 (PTHR14911:SF13)	biological_process(GO:0008150);tRNA methylation(GO:0030488)	tRNA related processes	F0ZV63	F0ZV63
Q54BW7	Proteomics	ATP-dependent metalloprotease	AAA DOMAIN-CONTAINING PROTEIN (PTHR23076:SF78)	proteolysis(GO:0006508);protein quality control for misfolded or incompletely synthesized proteins(GO:0006515);mitochondrion organization(GO:0007005)	Protein degradation	F0ZVX3	F0ZVX3	Q9ZEA2	P32795	P32795	Q96TA2	Q96TA2
Q54BY9	Proteomics	Uncharacterized protein	SUBFAMILY NOT NAMED (PTHR12673:SF78)	regulation of catalytic activity(GO:0050790);cheating during chimeric sorocarp development(GO:0099139)	Development	F0Z955	F0Z955		P53046			Q15811
Q54C45	Proteomics	Frataxin, mitochondrial (Fxn) (EC 1.16.3.1)	FRATAXIN, MITOCHONDRIAL (PTHR16821:SF2)	heme biosynthetic process(GO:0006783);ion transport(GO:0006811);cellular iron ion homeostasis(GO:0006879);iron-sulfur cluster assembly(GO:0016226);iron incorporation into metallo-sulfur cluster(GO:0018283);iron ion homeostasis(GO:0055072)	Fe/S protein biosynthesis	F0ZX16	F0ZX16	Q9ZDK5	Q07540	Q07540	Q16595	Q16595
Q54C69	Proteomics	Uncharacterized protein			Other	A0A152A0X5
Q54C70	Proteomics	Pyruvate dehydrogenase E1 component subunit alpha, mitochondrial (PDHE1-A) (EC 1.2.4.1)	PYRUVATE DEHYDROGENASE E1 COMPONENT SUBUNIT ALPHA (PTHR11516:SF60)	acetyl-CoA biosynthetic process from pyruvate(GO:0006086);glycolytic process(GO:0006096)	Respiratory chain subunits	A0A0L0BX56	F0Z755	Q9ZDR4	P16387	P16387	P29803	P29803
Q54CA5	Proteomics	S5 DRBM domain-containing protein	37S RIBOSOMAL PROTEIN S5, MITOCHONDRIAL (PTHR13718:SF61)	translation(GO:0006412)	Ribo. & translation	F0ZPJ8	F0ZPJ8	Q9ZCS2	P33759	P33759	P82675	P82675
Q54CC6	Proteomics	Uncharacterized protein				F0ZXK6	F0ZXK6
Q54CD3	Proteomics	TsaA-like domain-containing protein	TSAA-LIKE DOMAIN-CONTAINING PROTEIN (PTHR12818:SF5)	tRNA methylation(GO:0030488)	tRNA related processes	F0ZXQ8	F0ZXQ8					Q9BU70
Q54CE4	Proteomics	Probable isoleucine--tRNA ligase, mitochondrial (EC 6.1.1.5) (Isoleucyl-tRNA synthetase) (IleRS)	ISOLEUCINE--TRNA LIGASE, MITOCHONDRIAL (PTHR42765:SF1)	translation(GO:0006412);tRNA aminoacylation for protein translation(GO:0006418);isoleucyl-tRNA aminoacylation(GO:0006428);mitochondrial translation(GO:0032543);aminoacyl-tRNA metabolism involved in translational fidelity(GO:0106074)	tRNA related processes	A0A152A8M6	F0Z9P8	Q9ZCU4	P48526	P48526	Q9NSE4	Q9NSE4
Q54CG8	Proteomics	Uncharacterized protein				A0A1P8WKU5	F0ZK93
Q54CG9	Proteomics	Probable nucleoside diphosphate kinase DDB_G0292928 (EC 2.7.4.6)	NUCLEOSIDE DIPHOSPHATE KINASE (PTHR46161:SF3)	nucleoside diphosphate phosphorylation(GO:0006165);nucleotide metabolic process(GO:0009117);phosphorylation(GO:0016310)	Nucleotide metabolism	A0A1Y2CJH4	F0ZK92	Q9ZE91	P36010	P36010	O75414	O75414
Q54CK4	Proteomics	Uncharacterized protein	30S RIBOSOMAL PROTEIN S9, CHLOROPLASTIC (PTHR21569:SF1)	translation(GO:0006412)	Ribo. & translation	F0ZQD1	F0ZQD1	Q9ZDU0	P38120	P38120	P82933	P82933
Q54CL5	Proteomics	DNL-type domain-containing protein	DNL-TYPE ZINC FINGER PROTEIN (PTHR20922:SF13)	protein folding(GO:0006457);biological_process(GO:0008150);protein import into mitochondrial matrix(GO:0030150);protein stabilization(GO:0050821)	Protein import & biogenesis	F0Z819	F0Z819		P42844	P42844	Q5SXM8	Q5SXM8
Q54CL7	Proteomics	Prolyl endopeptidase (EC 3.4.21.-)	PROLYL OLIGOPEPTIDASE FAMILY PROTEIN (PTHR11757:SF12)	proteolysis(GO:0006508)	Protein degradation	F0Z822	F0Z822	Q9ZDP6			Q4J6C6	Q4J6C6
Q54CT8	Proteomics	Probable adenylate kinase B (AK B) (EC 2.7.4.3) (ATP-AMP transphosphorylase B) (ATP:AMP phosphotransferase) (Adenylate monophosphate kinase)	GTP:AMP PHOSPHOTRANSFERASE, MITOCHONDRIAL (PTHR23359:SF22)	nucleobase-containing compound metabolic process(GO:0006139);biological_process(GO:0008150);nucleoside triphosphate biosynthetic process(GO:0009142);phosphorylation(GO:0016310);AMP metabolic process(GO:0046033);nucleoside monophosphate phosphorylation(GO:0046940)	Nucleotide metabolism	A0A2K3E6L7	F0ZZ46	Q9ZCS6	P26364	P26364	Q9UIJ7	Q9UIJ7
Q54CV4	Proteomics	Uncharacterized protein	ATP SYNTHASE MITOCHONDRIAL F1 COMPLEX ASSEMBLY FACTOR 2 (PTHR21013:SF10)	proton-transporting ATP synthase complex assembly(GO:0043461)	Respiratory chain assembly	F0ZRK7	F0ZRK7		P22135	P22135	Q8N5M1	Q8N5M1
Q54CW7	Proteomics	Probable adenosylcobalamin-dependent ribonucleoside-triphosphate reductase (RTPR) (EC 1.17.4.2)	ADENOSYLCOBALAMIN-DEPENDENT RIBONUCLEOSIDE-TRIPHOSPHATE REDUCTASE-RELATED (PTHR43371:SF1)	DNA replication(GO:0006260);nucleoside triphosphate biosynthetic process(GO:0009142)	DNA related processes	F1A3P6	F1A3P6
Q54CX2	Proteomics	Uncharacterized protein				F1A3P9	F1A3P9
Q54CX6	Proteomics	Probable 3-hydroxyisobutyrate dehydrogenase, mitochondrial (HIBADH) (EC 1.1.1.31)	3-HYDROXYISOBUTYRATE DEHYDROGENASE, MITOCHONDRIAL (PTHR22981:SF7)	valine catabolic process(GO:0006574);branched-chain amino acid catabolic process(GO:0009083)	Amino acid metabolism	F1A2S8	F1A2S8				P31937	P31937
Q54CY2	Proteomics	Putative uncharacterized protein DDB_G0292556	HOMEOBOX PROTEIN B-H1-RELATED (PTHR24330:SF10)	regulation of transcription by RNA polymerase II(GO:0006357);biological_process(GO:0008150)	mRNA related processes	A0A0N4TJY9
Q54CZ2	Proteomics	Ubiquinone biosynthesis protein COQ4 homolog, mitochondrial (Coenzyme Q biosynthesis protein 4 homolog)	UBIQUINONE BIOSYNTHESIS PROTEIN COQ4 HOMOLOG, MITOCHONDRIAL (PTHR12922:SF7)	ubiquinone biosynthetic process(GO:0006744)	Cofactor biosynthesis	F0ZCJ7	F0ZCJ7		O13525	O13525	Q9Y3A0	Q9Y3A0
Q54CZ9	Proteomics	NADH dehydrogenase [ubiquinone] 1 alpha subcomplex assembly factor 3	NADH DEHYDROGENASE [UBIQUINONE] 1 ALPHA SUBCOMPLEX ASSEMBLY FACTOR 3 (PTHR21192:SF2)	mitochondrial respiratory chain complex I assembly(GO:0032981)	Respiratory chain assembly	F1A389	F1A389				Q9BU61	Q9BU61
Q54D02	Proteomics	L51_S25_CI-B8 domain-containing protein				D3B4X0
Q54D04	Proteomics	Probable malate dehydrogenase 2, mitochondrial (EC 1.1.1.37)	MALATE DEHYDROGENASE 2, MITOCHONDRIAL-RELATED (PTHR23382:SF0)	carbohydrate metabolic process(GO:0005975);tricarboxylic acid cycle(GO:0006099);oxaloacetate metabolic process(GO:0006107);malate metabolic process(GO:0006108);NADH metabolic process(GO:0006734);carboxylic acid metabolic process(GO:0019752)	Energy metabolism	F0Z8T4	F0Z8T4	Q9ZDF3	P17505	P17505	P40926	P40925
Q54D07	Proteomics	Cytochrome c1, heme protein, mitochondrial (Cytochrome c-1) (EC 7.1.1.8) (Complex III subunit 4) (Complex III subunit IV) (Cytochrome b-c1 complex subunit 4)	CYTOCHROME C1, HEME PROTEIN, MITOCHONDRIAL (PTHR10266:SF3)	mitochondrial electron transport, ubiquinol to cytochrome c(GO:0006122)	Respiratory chain subunits	F1A4T5	F1A4T5	Q9ZDQ4	P07143	P07143	P08574	P08574
Q54D12	Proteomics	Uncharacterized protein	E3 UBIQUITIN-PROTEIN LIGASE HECTD2-RELATED (PTHR45622:SF40)	response to mercury ion(GO:0046689)	Other	R7FMF3	F0Z8W2		P21827	Q08023	Q96I51	Q15034
Q54D27	Proteomics	Uncharacterized protein			Other	F0Z8T1	F0Z8T1
Q54D52	Proteomics	Uncharacterized protein				F1A5I8	F1A5I8
Q54D65	Proteomics	Uncharacterized protein	ACYL-COENZYME A THIOESTERASE 9, MITOCHONDRIAL (PTHR12655:SF0)	acyl-CoA metabolic process(GO:0006637)	Cofactor biosynthesis	F0ZIL8	F0ZIL8				Q9Y305	Q9Y305
Q54D67	Proteomics	SET and MYND domain-containing protein DDB_G0292454 (EC 2.1.1.-)	SET AND MYND DOMAIN-CONTAINING PROTEIN DDB_G0292140-RELATED (PTHR12197:SF211)	biological_process(GO:0008150);methylation(GO:0032259);histone lysine methylation(GO:0034968)	DNA related processes	F1A1T7	F1A1T7		P38890			Q6GMV2
Q54D88	Proteomics	Rhomboid domain-containing protein	RHOMBOID DOMAIN-CONTAINING PROTEIN (PTHR43731:SF25)	proteolysis(GO:0006508);regulation of mitochondrion organization(GO:0010821)	Protein degradation	F0ZK61	F0ZK61		P53259	P53259	Q9H300	Q9H300
Q54D99	Proteomics	Probable 39S ribosomal protein L53, mitochondrial (L53mt) (MRP-L53)	39S RIBOSOMAL PROTEIN L53, MITOCHONDRIAL (PTHR33618:SF1)		Ribo. & translation	F0ZUQ4	F0ZUQ4
Q54DD3	Proteomics	Aminomethyltransferase, mitochondrial (EC 2.1.2.10) (Glycine cleavage system T protein) (GCVT)	AMINOMETHYLTRANSFERASE, MITOCHONDRIAL (PTHR43757:SF2)	glycine catabolic process(GO:0006546);glycine decarboxylation via glycine cleavage system(GO:0019464)	Energy metabolism	F1A4B3	F1A4B3		P48015	P48015	P48728	P48728
Q54DF1	Proteomics	ATP synthase subunit gamma, mitochondrial (ATP synthase F1 subunit gamma) (F-ATPase gamma subunit)	ATP SYNTHASE SUBUNIT GAMMA, MITOCHONDRIAL (PTHR11693:SF22)	ATP biosynthetic process(GO:0006754);ion transport(GO:0006811);ATP synthesis coupled proton transport(GO:0015986)	Respiratory chain subunits	A0A152A6G3	F1A6B5	O50289	P38077	P38077	P36542	P36542
Q54DF7	Proteomics	Probable serine/threonine-protein kinase DDB_G0292354	TAU-TUBULIN KINASE HOMOLOG ASATOR (PTHR11909:SF300)	protein phosphorylation(GO:0006468);phosphorylation(GO:0016310);peptidyl-serine phosphorylation(GO:0018105)	Regulation & signaling	F0ZYK1	F0ZYK1		P29295	Q00772	P17612	Q6IQ55
Q54DG1	Proteomics	Aldehyde dehydrogenase family 3 comG (EC 1.2.1.5) (Communication mutant protein G)	ALDEDH DOMAIN-CONTAINING PROTEIN (PTHR43570:SF16)	cellular aldehyde metabolic process(GO:0006081);sorocarp development(GO:0030587)	Development	F0ZGT1	F0ZGT1		Q04458	Q04458	P51648	P43353
Q54DG6	Proteomics	Uncharacterized protein	METHYLTRANSFERASE LIKE (PTHR13184:SF5)	translation(GO:0006412);methylation(GO:0032259)	Ribo. & translation	F1A0Z3	F1A0Z3		P36056	P36056	Q9H7H0	Q9H7H0
Q54DI4	Proteomics	Uncharacterized protein			Other	F0ZYY3	F0ZYY3
Q54DK1	Proteomics	Sulfide:quinone oxidoreductase, mitochondrial (EC 1.8.5.8)	SULFIDE:QUINONE OXIDOREDUCTASE, MITOCHONDRIAL (PTHR10632:SF2)	regulation of sulfur metabolic process(GO:0042762);sulfide oxidation, using sulfide:quinone oxidoreductase(GO:0070221)	Fe/S protein biosynthesis	F0ZPU6	F0ZPU6				Q9Y6N5	Q9Y6N5
Q54DN9	Proteomics	Uncharacterized protein	SUBFAMILY NOT NAMED (PTHR24031:SF196)	rRNA processing(GO:0006364)	Ribo. & translation	F0Z8B6	F0Z8B6	Q9ZCQ0	P24783	P15424	Q9NUL7	P26196
Q54DQ8	Proteomics	Uncharacterized transmembrane protein DDB_G0292078				F0Z8C3	F0Z8C3
Q54DT8	Proteomics	Protoporphyrinogen oxidase (PPO) (EC 1.3.3.4)	PROTOPORPHYRINOGEN OXIDASE (PTHR42923:SF3)	porphyrin-containing compound biosynthetic process(GO:0006779);protoporphyrinogen IX biosynthetic process(GO:0006782);heme biosynthetic process(GO:0006783);cell motility(GO:0048870)	Other	F0ZRD3	F0ZRD3		P40012	P40012	P50336	P50336
Q54DU1	Proteomics	Mitochondrial substrate carrier family protein P (Solute carrier family 25 member 16 homolog A)	GRAVES DISEASE CARRIER PROTEIN (PTHR24089:SF705)	coenzyme A transport(GO:0015880);coenzyme A transmembrane transport(GO:0035349);transmembrane transport(GO:0055085)	Carriers & channels	F1A4J1	F1A4J1		Q12251	Q12251	P16260	P16260
Q54DW1	Proteomics	DOCKER domain-containing protein	DOCKER DOMAIN-CONTAINING PROTEIN (PTHR45653:SF8)	small GTPase mediated signal transduction(GO:0007264);regulation of catalytic activity(GO:0050790)	Regulation & signaling	F0ZUK8	F0ZUK8		Q06409	Q06409		Q8N1I0
Q54DX7	Proteomics	Taffazin (EC 2.3.1.-) (1-acylglycerophosphocholine O-acyltransferase)	TAFAZZIN (PTHR12497:SF0)	phospholipid metabolic process(GO:0006644);inner mitochondrial membrane organization(GO:0007007);cardiolipin acyl-chain remodeling(GO:0035965)	Morphology & dynamics	F0ZL18	F0ZL18		Q06510	Q06510	Q16635	Q16635
Q54DY1	Proteomics	Arginine biosynthesis bifunctional protein ArgJ, mitochondrial [Cleaved into: Arginine biosynthesis bifunctional protein ArgJ alpha chain; Arginine biosynthesis bifunctional protein ArgJ beta chain] [Includes: Glutamate N-acetyltransferase (GAT) (EC 2.3.1.35) (Ornithine acetyltransferase) (OATase) (Ornithine transacetylase); Amino-acid acetyltransferase (EC 2.3.1.1) (N-acetylglutamate synthase) (…	ARGININE BIOSYNTHESIS BIFUNCTIONAL PROTEIN ARGJ, MITOCHONDRIAL (PTHR23100:SF0)	arginine biosynthetic process(GO:0006526);ornithine biosynthetic process(GO:0006592);metabolic process(GO:0008152);cellular amino acid biosynthetic process(GO:0008652)	Amino acid metabolism	F0ZL16	F0ZL16		Q04728	Q04728
Q54DY9	Proteomics	Probable mitochondrial chaperone BCS1-B (BCS1-like protein 2)	MITOCHONDRIAL CHAPERONE BCS1 (PTHR23070:SF151)	protein insertion into mitochondrial inner membrane from matrix(GO:0032979);mitochondrial respiratory chain complex III assembly(GO:0034551);chaperone-mediated protein complex assembly(GO:0051131);protein transmembrane transport(GO:0071806)	Respiratory chain assembly	F0ZBU1	F0ZBU1	Q9ZEA2	P32839	P32839	Q9Y276	Q9Y276
Q54E00	Proteomics	Uncharacterized protein		protein import into mitochondrial matrix(GO:0030150)	Protein import & biogenesis	A0A152A1G7	F0ZJT7
Q54E22	Proteomics	Acyl carrier protein, mitochondrial (ACP) (NADH-ubiquinone oxidoreductase subunit AB1)	ACYL CARRIER PROTEIN, MITOCHONDRIAL (PTHR20863:SF64)	lipid metabolic process(GO:0006629);fatty acid metabolic process(GO:0006631);fatty acid biosynthetic process(GO:0006633)	Lipid metabolism	F0ZGB6	F0ZGB6	Q9ZCH9	P32463	P32463	O14561	O14561
Q54E30	Proteomics	Uncharacterized protein			Other	F0ZMB2	F0ZMB2
Q54E48	Proteomics	NADH dehydrogenase (ubiquinone) complex I, assembly factor 6 homolog	NADH DEHYDROGENASE (UBIQUINONE) COMPLEX I, ASSEMBLY FACTOR 6 (PTHR21181:SF13)	biological_process(GO:0008150);mitochondrial respiratory chain complex I assembly(GO:0032981)	Respiratory chain assembly	F0ZBS3	F0ZBS3				Q330K2	Q330K2
Q54E56	Proteomics	Uncharacterized protein	SUBFAMILY NOT NAMED (PTHR34740:SF6)			F0ZH60	F0ZH60
Q54E57	Proteomics	Uncharacterized protein				F1A2Y7	F1A2Y7					Q6ZRS2
Q54E61	Proteomics	Uncharacterized protein				F1A2Y7	F1A2Y7
Q54EE6	Proteomics	Uncharacterized protein				D3BP45	F0ZIE9
Q54EE7	Proteomics	SAP DNA-binding domain-containing protein	SAP DOMAIN-CONTAINING PROTEIN-RELATED (PTHR32488:SF76)	biological_process(GO:0008150)		D3B2X6	F0ZQS3					Q96JK9
Q54EN1	Proteomics	Ubiquinone biosynthesis monooxygenase COQ6, mitochondrial (EC 1.14.13.-)	UBIQUINONE BIOSYNTHESIS MONOOXYGENASE COQ6, MITOCHONDRIAL (PTHR43876:SF7)	ubiquinone biosynthetic process(GO:0006744)	Cofactor biosynthesis	F0ZRQ8	F0ZRQ8	Q9ZCZ0	P53318	P53318	Q9Y2Z9	Q9Y2Z9
Q54ES4	Proteomics	Redoxin domain-containing protein	REDOXIN DOMAIN-CONTAINING PROTEIN (PTHR10430:SF40)	cellular response to oxidative stress(GO:0034599);hydrogen peroxide catabolic process(GO:0042744);cell redox homeostasis(GO:0045454);cellular oxidant detoxification(GO:0098869)	Cellular response to stress	F0ZG92	F0ZG92				P30044	P30044
Q54ET5	Proteomics	Leucine--tRNA ligase, mitochondrial (EC 6.1.1.4) (LeuRM) (Leucyl-tRNA synthetase)	LEUCINE--TRNA LIGASE, MITOCHONDRIAL-RELATED (PTHR43740:SF2)	Group I intron splicing(GO:0000372);translation(GO:0006412);tRNA aminoacylation for protein translation(GO:0006418);leucyl-tRNA aminoacylation(GO:0006429);mitochondrial translation(GO:0032543);aminoacyl-tRNA metabolism involved in translational fidelity(GO:0106074)	tRNA related processes	F0ZI59	F0ZI59	Q9ZDB1	P11325	P11325	Q15031	Q15031
Q54EU1	Proteomics	Uncharacterized protein	PHOSPHATIDYLGLYCEROPHOSPHATASE GEP4, MITOCHONDRIAL (PTHR19288:SF25)	dephosphorylation(GO:0016311)	Regulation & signaling	F0ZMA4	F0ZMA4		P38812	P38812		Q96GD0
Q54EU7	Proteomics	Putative uncharacterized transmembrane protein DDB_G0291326				F1A4I7	F1A4I7
Q54EV4	Proteomics	Mitochondrial substrate carrier family protein A	MITOCHONDRIAL SUBSTRATE CARRIER FAMILY PROTEIN A (PTHR24089:SF92)	transmembrane transport(GO:0055085)	Carriers & channels	F0ZDW4	F0ZDW4		Q12251	Q12251	Q6NUK1	Q6NUK1
Q54EW1	Proteomics	Serine hydroxymethyltransferase 2 (SHMT 2) (EC 2.1.2.1) (Glycine hydroxymethyltransferase 2) (Serine methylase 2)	SERINE HYDROXYMETHYLTRANSFERASE 2 (PTHR11680:SF18)	L-serine catabolic process(GO:0006565);one-carbon metabolic process(GO:0006730);glycine biosynthetic process from serine(GO:0019264);tetrahydrofolate interconversion(GO:0035999);tetrahydrofolate metabolic process(GO:0046653);folic acid metabolic process(GO:0046655)	Amino acid metabolism	A0A2P6U2U0	F0ZDZ0	O08370	P37291	P37292	P34897	P34897
Q54EW4	Proteomics	Probable tRNA N6-adenosine threonylcarbamoyltransferase, mitochondrial (EC 2.3.1.234) (N6-L-threonylcarbamoyladenine synthase) (t(6)A synthase) (t(6)A37 threonylcarbamoyladenosine biosynthesis protein) (tRNA threonylcarbamoyladenosine biosynthesis protein)	TRNA N6-ADENOSINE THREONYLCARBAMOYLTRANSFERASE, MITOCHONDRIAL-RELATED (PTHR11735:SF6)	tRNA threonylcarbamoyladenosine modification(GO:0002949);tRNA processing(GO:0008033)	tRNA related processes	A0A151ZEQ4	F0ZUH7	Q9ZEA8	P43122	P43122	Q9H4B0	Q9H4B0
Q54EW8	Proteomics	Dihydrolipoyl dehydrogenase, mitochondrial (EC 1.8.1.4) (Dihydrolipoamide dehydrogenase) (Glycine cleavage system L protein)	DIHYDROLIPOYL DEHYDROGENASE, MITOCHONDRIAL (PTHR22912:SF151)	glycine catabolic process(GO:0006546);isoleucine catabolic process(GO:0006550);leucine catabolic process(GO:0006552);L-serine biosynthetic process(GO:0006564);valine catabolic process(GO:0006574);cell redox homeostasis(GO:0045454)	Amino acid metabolism	A0A0G4KCB5	F0ZDY0	Q9ZD83	P09624	P09624	P09622	P09622
Q54EX8	Proteomics	Uncharacterized protein	SOLUTE CARRIER FAMILY 49 MEMBER 4 (PTHR10924:SF27)	transmembrane transport(GO:0055085)	Carriers & channels	F0ZPC6	F0ZPC6					Q9Y5Y0
Q54F06	Proteomics	Altered inheritance of mitochondria protein 24, mitochondrial	ALTERED INHERITANCE OF MITOCHONDRIA PROTEIN 24, MITOCHONDRIAL (PTHR43657:SF1)			F0ZVF6	F0ZVF6
Q54F09	Proteomics	Uncharacterized protein			Other	F0ZVG0	F0ZVG0
Q54F10	Proteomics	NADH dehydrogenase [ubiquinone] flavoprotein 2, mitochondrial (EC 7.1.1.2)	NADH DEHYDROGENASE [UBIQUINONE] FLAVOPROTEIN 2, MITOCHONDRIAL (PTHR10371:SF3)	mitochondrial electron transport, NADH to ubiquinone(GO:0006120)	Respiratory chain subunits	F0ZVG1	F0ZVG1	Q9ZDH5			P19404	P19404
Q54F15	Proteomics	Iron-sulfur protein NUBPL (Nucleotide-binding protein-like)	IRON-SULFUR PROTEIN NUBPL (PTHR42961:SF2)	biological_process(GO:0008150);iron-sulfur cluster assembly(GO:0016226);mitochondrial respiratory chain complex I assembly(GO:0032981)	Fe/S protein biosynthesis	F0ZAV9	F0ZAV9	Q9ZE27	P40558		Q8TB37	Q8TB37
Q54F29	Proteomics	Uncharacterized protein			Other	F1A4D2	F1A4D2
Q54F37	Proteomics	Glutathione gamma-glutamylcysteinyltransferase (EC 2.3.2.15)	GLUTATHIONE GAMMA-GLUTAMYLCYSTEINYLTRANSFERASE (PTHR33447:SF2)	response to metal ion(GO:0010038);detoxification of copper ion(GO:0010273);protein phosphopantetheinylation(GO:0018215);phytochelatin biosynthetic process(GO:0046938);cellular detoxification of cadmium ion(GO:0098849)	Cellular response to stress	F0ZCA6	F0ZCA6
Q54F42	Proteomics	NADH dehydrogenase [ubiquinone] 1 alpha subcomplex subunit 6	NADH DEHYDROGENASE [UBIQUINONE] 1 ALPHA SUBCOMPLEX SUBUNIT 6 (PTHR12964:SF0)	response to oxidative stress(GO:0006979)	Cellular response to stress	A0A151ZKA7	F1A1R5				P56556	P56556
Q54F93	Proteomics	Mitochondrial-processing peptidase subunit alpha-2 (Alpha-MPP 2) (Ddalpha-MPP 2) (Inactive zinc metalloprotease alpha-2)	MITOCHONDRIAL-PROCESSING PEPTIDASE SUBUNIT ALPHA-2 (PTHR11851:SF187)	protein processing involved in protein targeting to mitochondrion(GO:0006627);response to bacterium(GO:0009617)	Protein import & biogenesis	F0ZAX2	F0ZAX2	O05945	P10507	P10507	Q10713	Q10713
Q54F94	Proteomics	Uncharacterized protein			Other	F0ZAQ9	F0ZAQ9
Q54FA9	Proteomics	Uncharacterized protein			Other	F0ZB00	F0ZB00
Q54FD7	Proteomics	Electron transfer flavoprotein subunit alpha, mitochondrial (Alpha-ETF)	ELECTRON TRANSFER FLAVOPROTEIN SUBUNIT ALPHA, MITOCHONDRIAL (PTHR43153:SF1)	electron transport chain(GO:0022900);fatty acid beta-oxidation using acyl-CoA dehydrogenase(GO:0033539)	Respiratory chain subunits	F0ZB52	F0ZB52		Q12480	Q12480	P13804	P13804
Q54FE6	Proteomics	Mitochondrial substrate carrier family protein S (Carnitine/acylcarnitine translocase) (CAC) (Solute carrier family 25 member 20 homolog B)	MITOCHONDRIAL SUBSTRATE CARRIER FAMILY PROTEIN S-RELATED (PTHR45624:SF12)	mitochondrial L-ornithine transmembrane transport(GO:1990575)	Carriers & channels	F0ZIA1	F0ZIA1		Q12375	Q12375	O43772	O43772
Q54FG4	Proteomics	Ras-related protein RabP	RAS-RELATED PROTEIN RABP (PTHR24073:SF1169)	intracellular protein transport(GO:0006886);lipid droplet organization(GO:0034389)	Other	A0A267DW32	F0ZMH2		P32939	P01120	Q969Q5	P51149
Q54FH4	Proteomics	Phosphoenolpyruvate carboxykinase (ATP) (EC 4.1.1.49)	PHOSPHOENOLPYRUVATE CARBOXYKINASE (ATP) (PTHR30031:SF11)	gluconeogenesis(GO:0006094)	Energy metabolism	F0ZKB9	F0ZKB9
Q54FK8	Proteomics	Ras-related protein RabM	RAB FAMILY (PTHR47981:SF20)	phagosome-lysosome fusion(GO:0090385)	Morphology & dynamics	A0A3M6TVM7	F0ZMH2		P32939	P48559	Q969Q5	P51151
Q54FN9	Proteomics	LYR motif-containing protein 4	LYR MOTIF-CONTAINING PROTEIN 4 (PTHR13166:SF7)	iron-sulfur cluster assembly(GO:0016226)	Fe/S protein biosynthesis	F1A1V4	F1A1V4		Q6Q560	Q6Q560	Q9HD34	Q9HD34
Q54FU9	Proteomics	Mitochondrial substrate carrier family protein W	MITOCHONDRIAL NICOTINAMIDE ADENINE DINUCLEOTIDE TRANSPORTER 1-RELATED (PTHR45683:SF2)	NAD transmembrane transport(GO:0035352)	Carriers & channels	F0ZKB3	F0ZKB3		P40556	P40556	Q9H2D1	Q9H2D1
Q54FV8	Proteomics	Uncharacterized protein	CENTROSOMAL PROTEIN 20 (PTHR15431:SF4)	biological_process(GO:0008150)	Other	F1A003	F1A003
Q54G19	Proteomics	Uncharacterized protein DDB_G0290437				F0ZNU1	F0ZNU1
Q54G34	Proteomics	Uncharacterized protein	J DOMAIN-CONTAINING PROTEIN (PTHR24074:SF49)		Protein maturation & folding	F0ZFC1	F0ZFC1
Q54G50	Proteomics	Uncharacterized protein		biological_process(GO:0008150)		F0ZF04	F0ZF04
Q54G54	Proteomics	Uncharacterized protein	MUCIN-LIKE PROTEIN (PTHR35476:SF2)		Other	F0ZHB7	F0ZHB7
Q54G97	Proteomics	Uncharacterized protein	39S RIBOSOMAL PROTEIN L32, MITOCHONDRIAL (PTHR21026:SF2)	translation(GO:0006412)	Ribo. & translation	F0ZDJ2	F0ZDJ2
Q54GF1	Proteomics	Uncharacterized protein				F0ZJ15	F0ZJ15
Q54GF3	Proteomics	NADH:ubiquinone reductase (non-electrogenic) (EC 1.6.5.9)	NADH:UBIQUINONE REDUCTASE (NON-ELECTROGENIC) (PTHR43706:SF30)		Respiratory chain subunits	F0ZJ16	F0ZJ16		P40215	P40215
Q54GH8	Proteomics	Ribosomal_L30 domain-containing protein	39S RIBOSOMAL PROTEIN L30, MITOCHONDRIAL (PTHR15892:SF2)	translation(GO:0006412)	Ribo. & translation	F0ZU10	F0ZU10
Q54GI9	Proteomics	Prohibitin-1, mitochondrial	PROHIBITIN (PTHR23222:SF0)	mitochondrion organization(GO:0007005);biological_process(GO:0008150)	Morphology & dynamics	F4PPP9	F0ZP25	Q9ZE25	P40961	P40961	P35232	P35232
Q54GJ7	Proteomics	Probable hydroxyacid-oxoacid transhydrogenase, mitochondrial (HOT) (EC 1.1.99.24)	HYDROXYACID-OXOACID TRANSHYDROGENASE, MITOCHONDRIAL (PTHR11496:SF83)	glutamate catabolic process via 2-oxoglutarate(GO:0006539)	Energy metabolism	A0A2A3E6J9	F1A5G4		P10127	P10127	Q8IWW8	Q8IWW8
Q54GK8	Proteomics	Uncharacterized protein	MALONYL-COA DECARBOXYLASE, MITOCHONDRIAL (PTHR28641:SF1)	acetyl-CoA biosynthetic process(GO:0006085);fatty acid biosynthetic process(GO:0006633);positive regulation of fatty acid oxidation(GO:0046321);malonyl-CoA catabolic process(GO:2001294)	Cofactor biosynthesis	F0ZFP5	F0ZFP5				O95822	O95822
Q54GL4	Proteomics	4HBT domain-containing protein	4HBT DOMAIN-CONTAINING PROTEIN (PTHR43240:SF8)	biological_process(GO:0008150)		F0ZJ46	F0ZJ46
Q54GQ0	Proteomics	GBBH-like_N domain-containing protein (Fragment)	DUF971 DOMAIN-CONTAINING PROTEIN (PTHR35303:SF5)			F1A002	F1A002
Q54GQ7	Proteomics	Uncharacterized protein	J DOMAIN-CONTAINING PROTEIN (PTHR24074:SF49)		Protein maturation & folding	F0ZFC1	F0ZFC1
Q54H24	Proteomics	Uncharacterized protein	IPT/TIG DOMAIN-CONTAINING PROTEIN-RELATED (PTHR31341:SF13)			A0A397GXC4	F0ZB97
Q54H56	Proteomics	Uncharacterized protein		biological_process(GO:0008150)		F0ZIC3	F0ZIC3
Q54H57	Proteomics	Uncharacterized protein		biological_process(GO:0008150)		F0ZIC2	F0ZIC2
Q54H66	Proteomics	Uncharacterized protein			Other	F0ZNK5	F0ZNK5
Q54HB2	Proteomics	Elongation factor Tu, mitochondrial	ELONGATION FACTOR TU, MITOCHONDRIAL (PTHR43721:SF22)	translation(GO:0006412);translational elongation(GO:0006414);mitochondrial translational elongation(GO:0070125)	Ribo. & translation	F0ZUZ7	F0ZUZ7	P48865	P02992	P02992	P49411	P49411
Q54HD3	Proteomics	Uncharacterized protein	MALONATE--COA LIGASE ACSF3, MITOCHONDRIAL (PTHR24096:SF267)	fatty acid biosynthetic process(GO:0006633)	Lipid metabolism	F1A5V9	F1A5V9	Q9ZCU1	P38137		Q4G176	Q4G176
Q54HG5	Proteomics	Succinate dehydrogenase assembly factor 1A, mitochondrial (SDH assembly factor 1A) (SDHAF1A)	SUCCINATE DEHYDROGENASE ASSEMBLY FACTOR 1, MITOCHONDRIAL (PTHR13675:SF1)	mitochondrial respiratory chain complex II assembly(GO:0034553)	Respiratory chain assembly	F1A3H8	F1A3H8		Q3E785	Q3E785	A6NFY7	A6NFY7
Q54HG7	Proteomics	Methylglutaconyl-CoA hydratase, mitochondrial (EC 4.2.1.18) (AU-specific RNA-binding enoyl-CoA hydratase homolog) (AU-binding protein/enoyl-CoA hydratase homolog)	SD19268P (PTHR11941:SF105)	leucine catabolic process(GO:0006552);fatty acid beta-oxidation(GO:0006635);biological_process(GO:0008150);branched-chain amino acid catabolic process(GO:0009083)	Amino acid metabolism	F0ZWJ0	F0ZWJ0	Q9ZCZ1	P28817	P28817	Q13825	Q13825
Q54HG8	Proteomics	Uncharacterized protein	37S RIBOSOMAL PROTEIN S28, MITOCHONDRIAL (PTHR23321:SF26)	translation(GO:0006412)	Ribo. & translation	F0ZRN5	F0ZRN5	Q9ZD44	P21771	P21771
Q54HH1	Proteomics	Uncharacterized protein	MITOCHONDRIAL DISTRIBUTION AND MORPHOLOGY PROTEIN 31 (PTHR31068:SF0)	mitochondrion inheritance(GO:0000001);mitochondrion organization(GO:0007005)	Morphology & dynamics	F0ZWJ1	F0ZWJ1		P38880	P38880
Q54HM4	Proteomics	Uncharacterized protein	FTSJ DOMAIN-CONTAINING PROTEIN (PTHR37524:SF2)		Ribo. & translation	F1A488	F1A488	Q9ZE00
Q54HM6	Proteomics	Cytochrome c oxidase assembly protein COX11, mitochondrial	CYTOCHROME C OXIDASE ASSEMBLY PROTEIN COX11, MITOCHONDRIAL-RELATED (PTHR21320:SF3)	aerobic respiration(GO:0009060);protein-containing complex assembly(GO:0065003)	Respiratory chain assembly	F1A449	F1A449	Q9ZDM3	P19516	P19516	Q9Y6N1	Q9Y6N1
Q54HN7	Proteomics	Peptidase_M48 domain-containing protein	METALLOENDOPEPTIDASE OMA1, MITOCHONDRIAL (PTHR22726:SF1)	proteolysis(GO:0006508)	Protein degradation	F1A3L5	F1A3L5		P36163	P36163	Q96E52	Q96E52
Q54HS2	Proteomics	Uncharacterized protein	NADPH-DEPENDENT 1-ACYLDIHYDROXYACETONE PHOSPHATE REDUCTASE (PTHR44169:SF6)	phosphatidic acid biosynthetic process(GO:0006654);triglyceride catabolic process(GO:0019433)	Energy metabolism	A0A482WBI0	F0ZGZ4	P50941	P40471	P40471	Q6IAN0	P14061
Q54HU6	Proteomics	Uncharacterized protein	TRANSPORTER, PUTATIVE (DUF179)-RELATED (PTHR31984:SF11)		Carriers & channels	F4QD97	F0ZSB1	Q9ZEB3
Q54HU7	Proteomics	RNase III domain-containing protein	RNASE III DOMAIN-CONTAINING PROTEIN (PTHR11207:SF33)	rRNA processing(GO:0006364);RNA processing(GO:0006396);production of siRNA involved in RNA interference(GO:0030422);primary miRNA processing(GO:0031053);pre-miRNA processing(GO:0031054);RNA phosphodiester bond hydrolysis(GO:0090501);RNA phosphodiester bond hydrolysis, endonucleolytic(GO:0090502)	Other regulation of gene expression	A0A152A5D8	F0ZSB0
Q54HV4	Proteomics	Cytochrome c oxidase assembly protein COX20, mitochondrial	CYTOCHROME C OXIDASE ASSEMBLY PROTEIN COX20, MITOCHONDRIAL (PTHR31586:SF1)	mitochondrial cytochrome c oxidase assembly(GO:0033617)	Respiratory chain assembly	F1A060	F1A060
Q54HW0	Proteomics	Thg1 domain-containing protein	THG1 DOMAIN-CONTAINING PROTEIN (PTHR12729:SF5)	tRNA modification(GO:0006400);tRNA processing(GO:0008033);mitochondrial tRNA 5'-end processing(GO:0097745)	tRNA related processes	F0ZTS6	F0ZTS6
Q54HW4	Proteomics	Uncharacterized protein	PROTEIN MTO1 HOMOLOG, MITOCHONDRIAL (PTHR11806:SF0)	tRNA wobble uridine modification(GO:0002098);tRNA processing(GO:0008033);tRNA methylation(GO:0030488);mitochondrial tRNA wobble uridine modification(GO:0070899)	tRNA related processes	A0A151ZDD8	F0ZCJ2	Q9ZE90	P53070	P53070	Q9Y2Z2	Q9Y2Z2
Q54HY7	Proteomics	Uncharacterized protein DDB_G0289137				F0ZGX2	F0ZGX2
Q54HY8	Proteomics	Probable mitochondrial chaperone BCS1-A (BCS1-like protein 1)	MITOCHONDRIAL CHAPERONE BCS1-A-RELATED (PTHR23070:SF9)	protein insertion into mitochondrial inner membrane from matrix(GO:0032979);mitochondrial respiratory chain complex III assembly(GO:0034551);chaperone-mediated protein complex assembly(GO:0051131);protein transmembrane transport(GO:0071806)	Respiratory chain assembly	F0ZGX3	F0ZGX3	Q9ZEA2	P32839	P32839	Q9Y276	Q9Y276
Q54I10	Proteomics	Probable methylmalonate-semialdehyde dehydrogenase [acylating], mitochondrial (MMSDH) (Malonate-semialdehyde dehydrogenase [acylating]) (EC 1.2.1.18) (EC 1.2.1.27)	METHYLMALONATE-SEMIALDEHYDE DEHYDROGENASE [ACYLATING], MITOCHONDRIAL (PTHR43866:SF3)	thymine catabolic process(GO:0006210);valine catabolic process(GO:0006574)	Amino acid metabolism	A0A1R3GZN4	F1A4H7		P40047	P40047	Q02252	Q02252
Q54I27	Proteomics	Uncharacterized protein	HEAT SHOCK PROTEIN 78, MITOCHONDRIAL (PTHR11638:SF18)	cellular response to heat(GO:0034605)	Cellular response to stress	A0A0E0D2C5	F0ZQ39	Q9ZEA9	P33416	P33416	Q9H078	Q9H078
Q54I30	Proteomics	Putative uncharacterized protein DDB_G0289041	DISCO-RELATED, ISOFORM A-RELATED (PTHR15021:SF0)	regulation of transcription, DNA-templated(GO:0006355);biological_process(GO:0008150)	DNA related processes	F0ZQ36	F0ZQ36
Q54I61	Proteomics	Uncharacterized protein	39S RIBOSOMAL PROTEIN L3, MITOCHONDRIAL (PTHR11229:SF8)	translation(GO:0006412)	Ribo. & translation	F0ZW28	F0ZW28	P48952	P31334	P31334	P09001	P09001
Q54I63	Proteomics	Mitochondrial tRNA-specific 2-thiouridylase 1 (EC 2.8.1.14)	MITOCHONDRIAL TRNA-SPECIFIC 2-THIOURIDYLASE 1 (PTHR11933:SF5)	tRNA wobble position uridine thiolation(GO:0002143);tRNA processing(GO:0008033)	tRNA related processes	F0ZQQ3	F0ZQQ3	Q9ZDM1	Q12093	Q12093	O75648	O75648
Q54I67	Proteomics	NADH dehydrogenase [ubiquinone] 1 alpha subcomplex subunit 12	NADH DEHYDROGENASE [UBIQUINONE] 1 ALPHA SUBCOMPLEX SUBUNIT 12 (PTHR12910:SF2)	mitochondrial respiratory chain complex I assembly(GO:0032981)	Respiratory chain assembly	F4Q6I3
Q54I78	Proteomics	Probable valine--tRNA ligase, mitochondrial (EC 6.1.1.9) (Valyl-tRNA synthetase) (ValRS)	VALINE--TRNA LIGASE, MITOCHONDRIAL-RELATED (PTHR11946:SF57)	translation(GO:0006412);tRNA aminoacylation for protein translation(GO:0006418);valyl-tRNA aminoacylation(GO:0006438);aminoacyl-tRNA metabolism involved in translational fidelity(GO:0106074)	tRNA related processes	F1A3L6	F1A3L6	Q9ZCN6	P07806	P07806	Q5ST30	P26640
Q54I88	Proteomics	Uncharacterized protein			Other	F4QCN2
Q54I90	Proteomics	NADH dehydrogenase [ubiquinone] flavoprotein 1, mitochondrial (EC 7.1.1.2) (Complex I-51kD) (CI-51kD) (NADH-ubiquinone oxidoreductase 51 kDa subunit)	NADH DEHYDROGENASE [UBIQUINONE] FLAVOPROTEIN 1, MITOCHONDRIAL (PTHR11780:SF10)	mitochondrial electron transport, NADH to ubiquinone(GO:0006120)	Respiratory chain subunits	A0A0B2V0G9	F1A1N9	Q9ZE33			P49821	P49821
Q54I91	Proteomics	Small heat shock protein hspI, mitochondrial	SMALL HEAT SHOCK PROTEIN HSPI, MITOCHONDRIAL-RELATED (PTHR11527:SF310)	protein folding(GO:0006457);biological_process(GO:0008150);response to heat(GO:0009408);response to salt stress(GO:0009651);response to hydrogen peroxide(GO:0042542);protein complex oligomerization(GO:0051259)	Cellular response to stress	F1A0W8	F1A0W8		P15992
Q54IA0	Proteomics	Cytochrome c oxidase assembly protein COX19	CYTOCHROME C OXIDASE ASSEMBLY PROTEIN COX19 (PTHR21107:SF2)	mitochondrial cytochrome c oxidase assembly(GO:0033617)	Respiratory chain assembly	F0ZU98	F0ZU98		Q3E731	Q3E731	Q49B96	Q49B96
Q54IA1	Proteomics	Uncharacterized protein	SUBFAMILY NOT NAMED (PTHR32134:SF158)			F0Z8C0	F0ZWR3
Q54IA8	Proteomics	Ferrochelatase, mitochondrial (EC 4.99.1.1) (Heme synthase) (Protoheme ferro-lyase)	FERROCHELATASE, MITOCHONDRIAL (PTHR11108:SF1)	porphyrin-containing compound biosynthetic process(GO:0006779);heme biosynthetic process(GO:0006783)	Fe/S protein biosynthesis	F0ZES6	F0ZES6	Q9ZC84	P16622	P16622	P22830	P22830
Q54IB4	Proteomics	Uncharacterized protein	CNN_1N DOMAIN-CONTAINING PROTEIN-RELATED (PTHR46373:SF2)			F0ZSG2	F0ZSG2
Q54IC8	Proteomics	RF_PROK_I domain-containing protein	RF_PROK_I DOMAIN-CONTAINING PROTEIN (PTHR43116:SF3)	translation(GO:0006412);translational termination(GO:0006415)	Ribo. & translation	F0ZYA1	F0ZYA1	Q9ZDQ2	P30775	P30775	O75570	O75570
Q54ID0	Proteomics	Cytochrome c oxidase copper chaperone	CYTOCHROME C OXIDASE COPPER CHAPERONE (PTHR16719:SF0)	mitochondrial cytochrome c oxidase assembly(GO:0033617)	Respiratory chain assembly	F0ZZA3	F0ZZA3		Q12287	Q12287	Q14061	Q14061
Q54IF0	Proteomics	Probable 39S ribosomal protein L21, mitochondrial (L21mt) (MRP-L21)	39S RIBOSOMAL PROTEIN L21, MITOCHONDRIAL (PTHR21349:SF0)	translation(GO:0006412)	Ribo. & translation	F0ZAJ2	F0ZAJ2	Q9ZCI9			Q7Z2W9	Q7Z2W9
Q54IH6	Proteomics	Probable serine/threonine-protein kinase abkA (EC 2.7.11.-)	ABC1 DOMAIN-CONTAINING PROTEIN (PTHR43851:SF3)	protein phosphorylation(GO:0006468);ubiquinone biosynthetic process(GO:0006744);phosphorylation(GO:0016310)	Cofactor biosynthesis	F1A4B6	F1A4B6	Q9ZCP5	P27697	P27697	Q8NI60	Q8NI60
Q54IL4	Proteomics	Uncharacterized protein				F4Q2Z1
Q54IM8	Proteomics	Isobutyryl-CoA dehydrogenase, mitochondrial (EC 1.3.8.-) (Acyl-CoA dehydrogenase family member 8 homolog)	ISOBUTYRYL-COA DEHYDROGENASE, MITOCHONDRIAL (PTHR43831:SF1)	valine catabolic process(GO:0006574);lipid metabolic process(GO:0006629);branched-chain amino acid catabolic process(GO:0009083)	Amino acid metabolism	A0A182NB72	F0ZVU4				Q9UKU7	Q9UKU7
Q54IN6	Proteomics	Uncharacterized protein DDB_G0288629			Other	F0ZYB3	F0ZYB3
Q54IP6	Proteomics	Era-type G domain-containing protein	GTPASE ERA, MITOCHONDRIAL (PTHR42698:SF3)	ribosomal small subunit assembly(GO:0000028)	Ribo. & translation	A0A152A2F1	F0ZW32	Q9ZE30	P32559	P32559	O75616	O75616
Q54IQ1	Proteomics	Uncharacterized protein	THIOREDOXIN DOMAIN-CONTAINING PROTEIN (PTHR45663:SF11)	cell redox homeostasis(GO:0045454)	Cellular response to stress	F0ZYA9	F0ZYA9				Q99757	Q99757
Q54IQ2	Proteomics	Uncharacterized protein	ATP-DEPENDENT PROTEASE ATPASE SUBUNIT HSLU (PTHR48102:SF3)	proteolysis(GO:0006508)	Protein degradation	F0ZW34	F0ZW34	Q9ZDK8	P38323	P38323	O76031	O76031
Q54IW4	Proteomics	Uncharacterized protein	TRANSLATION INITIATION FACTOR IF-3, MITOCHONDRIAL (PTHR10938:SF0)	translation(GO:0006412);translational initiation(GO:0006413);ribosome disassembly(GO:0032790);mitochondrial translational initiation(GO:0070124)	Ribo. & translation	F1A140	F1A140
Q54IW8	Proteomics	RNB domain-containing protein	DIS3-LIKE EXONUCLEASE 2 (PTHR23355:SF9)	RNA phosphodiester bond hydrolysis(GO:0090501);RNA phosphodiester bond hydrolysis, exonucleolytic(GO:0090503)	Other regulation of gene expression	F1A5R4	F1A5R4		P39112	P39112		Q8IYB7
Q54J36	Proteomics	Uncharacterized protein				F0ZLY7	F0ZLY7
Q54J68	Proteomics	10 kDa heat shock protein, mitochondrial (Hsp10) (10 kDa chaperonin) (Chaperonin 10) (CPN10)	10 KDA HEAT SHOCK PROTEIN, MITOCHONDRIAL (PTHR10772:SF0)	protein folding(GO:0006457);chaperone cofactor-dependent protein refolding(GO:0051085)	Cellular response to stress	F4PTC3	F0ZRW9	Q9ZCT6	P38910	P38910	P61604	P61604
Q54J76	Proteomics	Radical_SAM domain-containing protein	RADICAL_SAM DOMAIN-CONTAINING PROTEIN (PTHR30544:SF5)	rRNA processing(GO:0006364);tRNA methylation(GO:0030488);methylation(GO:0032259);rRNA base methylation(GO:0070475)	Ribo. & translation	F0Z7P0	F0Z7P0
Q54J94	Proteomics	SF4 helicase domain-containing protein	TWINKLE PROTEIN, MITOCHONDRIAL (PTHR12873:SF0)	DNA replication(GO:0006260);mitochondrial DNA replication(GO:0006264);DNA replication, synthesis of RNA primer(GO:0006269);DNA duplex unwinding(GO:0032508)	DNA related processes	A0A151ZK59	F0ZL70				Q96RR1	Q96RR1
Q54J97	Proteomics	60 kDa heat shock protein, mitochondrial (60 kDa chaperonin) (Chaperonin 60) (CPN60) (Heat shock protein 60) (HSP-60) (Hsp60)	60 KDA HEAT SHOCK PROTEIN, MITOCHONDRIAL (PTHR45633:SF3)	protein folding(GO:0006457);mitochondrion organization(GO:0007005);response to heat(GO:0009408);asexual reproduction(GO:0019954);sorocarp morphogenesis(GO:0031288);protein refolding(GO:0042026);defense response to bacterium(GO:0042742);positive phototaxis(GO:0046956)	Cellular response to stress	A0A0E0CV41	F0ZFL7	Q9ZCT7	P19882	P19882	P10809	P10809
Q54JC1	Proteomics	Peptide deformylase (EC 3.5.1.88)	PEPTIDE DEFORMYLASE (PTHR10458:SF22)	translation(GO:0006412);peptidyl-methionine modification(GO:0018206)	Ribo. & translation	F0ZJ40	F0ZJ40	Q9ZDV8			Q9HBH1	Q9HBH1
Q54JC2	Proteomics	Uncharacterized protein DDB_G0288155	SUBFAMILY NOT NAMED (PTHR13061:SF53)		Other	F0ZP27	F0ZP27	Q9ZD31
Q54JD2	Proteomics	Putative uncharacterized protein DDB_G0288137	COMPLEMENT COMPONENT 1 Q SUBCOMPONENT-BINDING PROTEIN, MITOCHONDRIAL (PTHR10826:SF1)	biological_process(GO:0008150);positive regulation of mitochondrial translation(GO:0070131)	Ribo. & translation	F0ZBI1	F0ZBI1
Q54JD9	Proteomics	Probable succinyl-CoA:3-ketoacid coenzyme A transferase, mitochondrial (EC 2.8.3.5) (3-oxoacid CoA-transferase)	SUCCINYL-COA:3-KETOACID-COENZYME A TRANSFERASE (PTHR13707:SF23)	cellular ketone body metabolic process(GO:0046950);ketone body catabolic process(GO:0046952)	Energy metabolism	A0A1J8QMB9	F1A566				P55809	P55809
Q54JE3	Proteomics	60S ribosomal protein L22 1	60S RIBOSOMAL PROTEIN L22-RELATED (PTHR10064:SF0)	cytoplasmic translation(GO:0002181);translation(GO:0006412)	Ribo. & translation	F0ZFP7	F0ZFP7		P05749			P35268
Q54JE4	Proteomics	2-oxoglutarate dehydrogenase, mitochondrial (EC 1.2.4.2) (2-oxoglutarate dehydrogenase complex component E1) (OGDC-E1) (Alpha-ketoglutarate dehydrogenase)	2-OXOGLUTARATE DEHYDROGENASE E1 COMPONENT DHKTD1, MITOCHONDRIAL-RELATED (PTHR23152:SF4)	glycolytic process(GO:0006096);tricarboxylic acid cycle(GO:0006099)	Energy metabolism	F0ZSW1	F0ZSW1	Q9ZDY3	P20967	P20967	Q02218	Q02218
Q54JE9	Proteomics	E3 ubiquitin-protein ligase (EC 2.3.2.27)	E3 UBIQUITIN-PROTEIN LIGASE (PTHR21497:SF30)	protein ubiquitination(GO:0016567);ubiquitin-dependent protein catabolic process via the N-end rule pathway(GO:0071596)	Protein degradation	F0ZCM2	F0ZCM2					Q6ZT12
Q54JI6	Proteomics	Uncharacterized protein	MITOCHONDRIAL RIBONUCLEASE P CATALYTIC SUBUNIT (PTHR13547:SF1)	tRNA 5'-leader removal(GO:0001682);asexual reproduction(GO:0019954);RNA phosphodiester bond hydrolysis(GO:0090501);RNA phosphodiester bond hydrolysis, endonucleolytic(GO:0090502);mitochondrial tRNA 5'-end processing(GO:0097745)	tRNA related processes	F0ZLW7	F0ZLW7		P48237	P48237	O75127	O75127
Q54JK1	Proteomics	TPR repeat-containing protein DDB_G0287999	EUKARYOTIC TRANSLATION INITIATION FACTOR 4G1, ISOFORM B-RELATED (PTHR23253:SF9)		Ribo. & translation	A0A1X0NUH4	F1A053		P33332			Q96EU6
Q54JK2	Proteomics	Uncharacterized protein	B BOX-TYPE DOMAIN-CONTAINING PROTEIN-RELATED (PTHR16148:SF19)		Other regulation of gene expression	F0ZBJ7	F0ZBJ7
Q54JL2	Proteomics	RNB domain-containing protein	DIS3-LIKE EXONUCLEASE 2-RELATED (PTHR23355:SF44)	mRNA catabolic process(GO:0006402);RNA phosphodiester bond hydrolysis(GO:0090501);RNA phosphodiester bond hydrolysis, exonucleolytic(GO:0090503)	mRNA related processes	F0ZJ59	F0ZJ59
Q54JM7	Proteomics	Uncharacterized protein		biological_process(GO:0008150)		F0ZIF8	F0ZIF8
Q54JR3	Proteomics	Uncharacterized protein	ADENYLATE KINASE (PTHR23359:SF85)	nucleobase-containing compound metabolic process(GO:0006139);phosphorylation(GO:0016310);nucleoside monophosphate phosphorylation(GO:0046940)	Nucleotide metabolism	F1A4I4	F1A4I4	Q9ZCS6	P07170	P07170	P54819	P54819
Q54JS1	Proteomics	Uncharacterized protein	CALCIUM UPTAKE PROTEIN 1, MITOCHONDRIAL (PTHR12294:SF1)	mitochondrial calcium ion transmembrane transport(GO:0006851);calcium import into the mitochondrion(GO:0036444);mitochondrial calcium ion homeostasis(GO:0051560)	Carriers & channels	F1A1X2	F1A1X2				Q9BPX6	Q9BPX6
Q54JT0	Proteomics	Uncharacterized protein	10 KDA HEAT SHOCK PROTEIN, MITOCHONDRIAL (PTHR10772:SF0)	protein folding(GO:0006457);chaperone cofactor-dependent protein refolding(GO:0051085)	Protein maturation & folding	F0ZRW9	F0ZRW9	Q9ZCT6	P38910	P38910	P61604	P61604
Q54JT6	Proteomics	Arginyl-tRNA synthetase (EC 6.1.1.19)	ARGININE--TRNA LIGASE, CYTOPLASMIC (PTHR11956:SF5)	translation(GO:0006412);tRNA aminoacylation for protein translation(GO:0006418);arginyl-tRNA aminoacylation(GO:0006420)	Amino acid metabolism	F0ZFF1	F0ZFF1	Q9ZE81	Q05506	P38714	Q5T160	P54136
Q54JT8	Proteomics	E3 ubiquitin-protein ligase (EC 2.3.2.27)	E3 UBIQUITIN-PROTEIN LIGASE (PTHR21497:SF30)	protein ubiquitination(GO:0016567);ubiquitin-dependent protein catabolic process via the N-end rule pathway(GO:0071596)	Protein degradation	F0ZCM2	F0ZCM2		Q12019			Q6ZT12
Q54JU0	Proteomics	Glycine cleavage system H-like protein gcvH5, mitochondrial	GLYCINE CLEAVAGE SYSTEM H PROTEIN, MITOCHONDRIAL (PTHR11715:SF3)	protein lipoylation(GO:0009249);glycine decarboxylation via glycine cleavage system(GO:0019464)	Protein maturation & folding	A0A103YG57	F0ZRW6		P39726	P39726	P23434	P23434
Q54JV0	Proteomics	E3 ubiquitin-protein ligase (EC 2.3.2.27)	E3 UBIQUITIN-PROTEIN LIGASE (PTHR21497:SF30)	protein ubiquitination(GO:0016567);ubiquitin-dependent protein catabolic process via the N-end rule pathway(GO:0071596)	Protein degradation	F0ZCM2	F0ZCM2					Q6ZT12
Q54JV3	Proteomics	UBA domain-containing protein				F1A136	F1A136					Q8NBM4
Q54JV8	Proteomics	Probable glycine cleavage system H protein 1, mitochondrial	GLYCINE CLEAVAGE SYSTEM H PROTEIN, MITOCHONDRIAL (PTHR11715:SF3)	protein lipoylation(GO:0009249);response to organic cyclic compound(GO:0014070);glycine decarboxylation via glycine cleavage system(GO:0019464)	Protein maturation & folding	A0A0V1ATX5	F0ZRW5		P39726	P39726	P23434	P23434
Q54JW0	Proteomics	Arginine-hydroxylase NDUFAF5, mitochondrial (EC 1.-.-.-) (NADH dehydrogenase [ubiquinone] 1 alpha subcomplex assembly factor 5) (Putative methyltransferase NDUFAF5) (EC 2.1.1.-)	ARGININE-HYDROXYLASE NDUFAF5, MITOCHONDRIAL (PTHR13090:SF1)	negative regulation of autophagy(GO:0010507);sporulation resulting in formation of a cellular spore(GO:0030435);culmination involved in sorocarp development(GO:0031154);methylation(GO:0032259);mitochondrial respiratory chain complex I assembly(GO:0032981);phototaxis(GO:0042331)	Development	F0ZLS2	F0ZLS2	Q9ZD84			Q5TEU4	Q5TEU4
Q54JX1	Proteomics	(d)CMP kinase (EC 2.7.4.25)		nucleobase-containing compound metabolic process(GO:0006139);nucleoside monophosphate phosphorylation(GO:0046940)	Regulation & signaling	F0ZAZ6	F0ZAZ6
Q54JX6	Proteomics	Uncharacterized protein			Other	F0ZPX0	F0ZPX0
Q54JZ8	Proteomics	Uncharacterized protein	F-BOX DOMAIN-CONTAINING PROTEIN (PTHR12262:SF18)	negative regulation of translation(GO:0017148)	Ribo. & translation	F0ZTA9	F0ZTA9
Q54K15	Proteomics	Uncharacterized protein		protein kinase A signaling(GO:0010737);rRNA catabolic process(GO:0016075);nucleic acid phosphodiester bond hydrolysis(GO:0090305);RNA phosphodiester bond hydrolysis, exonucleolytic(GO:0090503)	Other regulation of gene expression	F0ZUU3	F0ZUU3
Q54K35	Proteomics	Mitochondrial import inner membrane translocase subunit tim17	AT05822P-RELATED (PTHR10485:SF0)	protein transport(GO:0015031);protein import into mitochondrial matrix(GO:0030150)	Carriers & channels	F0ZP39	F0ZP39		P39515	P39515	Q99595	Q99595
Q54K38	Proteomics	Mitochondrial escape protein 2 homolog	MITOCHONDRIAL ESCAPE PROTEIN 2 (PTHR32198:SF2)	mitochondrial genome maintenance(GO:0000002);mRNA processing(GO:0006397)	DNA related processes	F0ZLZ2	F0ZLZ2		P32843	P32843
Q54K52	Proteomics	Uncharacterized protein		biological_process(GO:0008150)		F0ZIM9	F0ZIM9
Q54K54	Proteomics	Putative uncharacterized protein DDB_G0287599				A0A2I1G8W4	F0Z9E4
Q54K70	Proteomics	Uncharacterized protein	NUCLEASE EXOG, MITOCHONDRIAL (PTHR13966:SF5)	DNA metabolic process(GO:0006259);nucleic acid phosphodiester bond hydrolysis(GO:0090305);RNA phosphodiester bond hydrolysis, endonucleolytic(GO:0090502)	DNA related processes	F0ZZH8	F0ZZH8		P08466	P08466	Q9Y2C4	Q9Y2C4
Q54K91	Proteomics	Acetyl-CoA hydrolase (EC 3.1.2.1) (Acetyl-CoA deacylase) (Acetyl-CoA acylase)	ACETYL-COA HYDROLASE (PTHR43609:SF1)	acetate metabolic process(GO:0006083);propionate metabolic process, methylcitrate cycle(GO:0019679)	Lipid metabolism	A0A151ZGZ6	F0ZCH8		P32316	P32316
Q54K93	Proteomics	Putative uncharacterized protein DDB_G0287517			Other	A0A152A9E9	F0ZJ51
Q54KB7	Proteomics	Glutamate dehydrogenase, mitochondrial (GDH) (EC 1.4.1.3)	GLUTAMATE DEHYDROGENASE 1, MITOCHONDRIAL (PTHR11606:SF13)	cellular amino acid metabolic process(GO:0006520);glutamate catabolic process(GO:0006538)	Amino acid metabolism	F0ZLS6	F0ZLS6		P07262		P49448	P49448
Q54KE6	Proteomics	Methylcrotonoyl-CoA carboxylase subunit alpha, mitochondrial (MCCase subunit alpha) (EC 6.4.1.4) (3-methylcrotonyl-CoA carboxylase 1) (3-methylcrotonyl-CoA carboxylase biotin-containing subunit) (3-methylcrotonyl-CoA:carbon dioxide ligase subunit alpha)	METHYLCROTONOYL-COA CARBOXYLASE SUBUNIT ALPHA, MITOCHONDRIAL-RELATED (PTHR18866:SF33)	leucine catabolic process(GO:0006552)	Amino acid metabolism	F0ZJ63	F0ZJ63	Q9ZCU3	P32528	P32874	Q96RQ3	Q96RQ3
Q54KG7	Proteomics	Probable NADPH:adrenodoxin oxidoreductase, mitochondrial (AR) (Adrenodoxin reductase) (EC 1.18.1.6) (Ferredoxin--NADP(+) reductase) (Ferredoxin reductase)	NADPH:ADRENODOXIN OXIDOREDUCTASE, MITOCHONDRIAL (PTHR11938:SF91)	ubiquinone biosynthetic process(GO:0006744);electron transport chain(GO:0022900)	Cofactor biosynthesis	F0ZRW1	F0ZRW1		P48360	P48360	P22570	P22570
Q54KH9	Proteomics	RRM domain-containing protein	RRM DOMAIN-CONTAINING PROTEIN (PTHR48033:SF10)	biological_process(GO:0008150);regulation of gene expression(GO:0010468)	Other regulation of gene expression	A0A0D9VA55	F0ZF84		Q99383		Q9GZT3	Q14011
Q54KI1	Proteomics	G domain-containing protein	G DOMAIN-CONTAINING PROTEIN (PTHR43681:SF1)		Regulation & signaling	F1A3F4	F1A3F4					Q9H223
Q54KM7	Proteomics	Glycine dehydrogenase (decarboxylating), mitochondrial (EC 1.4.4.2) (Glycine cleavage system P protein) (Glycine decarboxylase) (Glycine dehydrogenase (aminomethyl-transferring))	GLYCINE DEHYDROGENASE (DECARBOXYLATING), MITOCHONDRIAL (PTHR11773:SF1)	glycine metabolic process(GO:0006544);glycine catabolic process(GO:0006546);glycine decarboxylation via glycine cleavage system(GO:0019464)	Amino acid metabolism	F0ZJ64	F0ZJ64		P49095	P49095	P23378	P23378
Q54KN1	Proteomics	Random cDNA clone veg110				F0ZII2	F0ZII2
Q54KP5	Proteomics	J domain-containing protein	J DOMAIN-CONTAINING PROTEIN (PTHR24074:SF49)		Protein maturation & folding	F0ZFC1	F0ZFC1
Q54KR0	Proteomics	AlbA_2 domain-containing protein	ALBA_2 DOMAIN-CONTAINING PROTEIN (PTHR12155:SF41)			I1YI43						Q8IYM2
Q54KT4	Proteomics	Uncharacterized protein	F-BOX DOMAIN-CONTAINING PROTEIN (PTHR12262:SF18)	RNA processing(GO:0006396);negative regulation of translation(GO:0017148);RNA phosphodiester bond hydrolysis(GO:0090501);RNA phosphodiester bond hydrolysis, endonucleolytic(GO:0090502)	Ribo. & translation	F1A4Y0	F1A4Y0
Q54KV4	Proteomics	CDK5RAP1-like protein	MITOCHONDRIAL TRNA METHYLTHIOTRANSFERASE CDK5RAP1 (PTHR43020:SF2)	tRNA modification(GO:0006400);tRNA methylthiolation(GO:0035600);negative regulation of cyclin-dependent protein serine/threonine kinase activity(GO:0045736)	tRNA related processes	F0ZQK4	F0ZQK4	Q9ZCE8			Q96SZ6	Q96SZ6
Q54KX3	Proteomics	Putative vacuolar protein sorting-associated protein 13F	VACUOLAR PROTEIN SORTING-ASSOCIATED PROTEIN 13F-RELATED (PTHR16166:SF97)	protein targeting to vacuole(GO:0006623);protein transport(GO:0015031);detection of bacterium(GO:0016045);protein retention in Golgi apparatus(GO:0045053);defense response to Gram-negative bacterium(GO:0050829);response to folic acid(GO:0051593)	Morphology & dynamics	n/a	F1A2I8		Q07878	Q07878	Q5THJ4	Q709C8
Q54KY0	Proteomics	Uncharacterized protein	SUBFAMILY NOT NAMED (PTHR21530:SF2)			F0ZFR2	F0ZFR2					Q9H4I3
Q54KY1	Proteomics	Lipoate--protein ligase (EC 6.3.1.20)	LIPOYLTRANSFERASE 1, MITOCHONDRIAL (PTHR12561:SF3)	cellular protein modification process(GO:0006464);protein lipoylation(GO:0009249);protein phosphopantetheinylation(GO:0018215)	Protein maturation & folding	F0ZIN5	F0ZIN5		P47051	P47051	Q9Y234	Q9Y234
Q54L05	Proteomics	Uncharacterized protein	RING-TYPE DOMAIN-CONTAINING PROTEIN (PTHR25464:SF2)			F1A268	F1A268		P40072			O15344
Q54L14	Proteomics	J domain-containing protein	J DOMAIN-CONTAINING PROTEIN (PTHR24074:SF49)		Protein maturation & folding	F0ZKH5	F0ZFC1
Q54L16	Proteomics	J domain-containing protein	J DOMAIN-CONTAINING PROTEIN (PTHR24074:SF49)		Protein maturation & folding	F0ZKH5	F0ZFC1
Q54L27	Proteomics	Uncharacterized protein				F0ZJD8	F0ZJD8
Q54L39	Proteomics	RWP-RK domain-containing protein				A0A151ZIG8	F0ZPZ7
Q54L63	Proteomics	Glutamyl-tRNA(Gln) amidotransferase subunit A, mitochondrial (Glu-AdT subunit A) (EC 6.3.5.7)	GLUTAMYL-TRNA(GLN) AMIDOTRANSFERASE SUBUNIT A, MITOCHONDRIAL (PTHR11895:SF7)	translation(GO:0006412);mitochondrial translation(GO:0032543);glutaminyl-tRNAGln biosynthesis via transamidation(GO:0070681)	tRNA related processes	F0ZVL5	F0ZVL5	Q9ZE10	Q03557	Q03557	Q9H0R6	Q9H0R6
Q54L87	Proteomics	Putative uncharacterized protein DDB_G0286829				A0A152A7W7	F0ZD47
Q54L97	Proteomics	Uncharacterized protein				F1A4R9	F1A4R9
Q54LD3	Proteomics	RNB domain-containing protein	RNB DOMAIN-CONTAINING PROTEIN (PTHR23355:SF55)	RNA phosphodiester bond hydrolysis(GO:0090501);RNA phosphodiester bond hydrolysis, exonucleolytic(GO:0090503)	mRNA related processes	F0ZQ51	F0ZQ51		P39112	P39112
Q54LH3	Proteomics	3-methyl-2-oxobutanoate hydroxymethyltransferase (EC 2.1.2.11)	3-METHYL-2-OXOBUTANOATE HYDROXYMETHYLTRANSFERASE (PTHR20881:SF0)	pantothenate biosynthetic process(GO:0015940);methylation(GO:0032259)	Cofactor biosynthesis	F0ZNN8	F0ZNN8		P38122	P38122
Q54LM5	Proteomics	PseudoU_synth_1 domain-containing protein	PSEUDOU_SYNTH_1 DOMAIN-CONTAINING PROTEIN (PTHR11142:SF9)	pseudouridine synthesis(GO:0001522);tRNA processing(GO:0008033);RNA modification(GO:0009451);tRNA pseudouridine synthesis(GO:0031119);mRNA pseudouridine synthesis(GO:1990481)	tRNA related processes	A0A152A1Z8	F0ZX60		Q12211	P53167	Q9Y606	Q9Y606
Q54LM9	Proteomics	Uncharacterized protein	MITOCHONDRIAL IMPORT INNER MEMBRANE TRANSLOCASE SUBUNIT TIM23-RELATED (PTHR15371:SF0)	protein import into mitochondrial matrix(GO:0030150)	Protein import & biogenesis	F0ZHW0	F0ZHW0
Q54LN5	Proteomics	Uncharacterized protein	LEISHMANOLYSIN-LIKE PEPTIDASE (PTHR10942:SF0)	proteolysis(GO:0006508);cell adhesion(GO:0007155)	Protein degradation	F0ZXE5	F0ZXE5					Q96KR4
Q54LP4	Proteomics	Lysyl-tRNA synthetase	LYSYL-TRNA SYNTHETASE (PTHR42918:SF7)	tRNA aminoacylation for protein translation(GO:0006418);lysyl-tRNA aminoacylation(GO:0006430)	tRNA related processes	F0ZFK3	F0ZFK3	Q9ZE17	P15180	P32048	Q15046	Q15046
Q54LP9	Proteomics	Uncharacterized protein	ACYL-COENZYME A THIOESTERASE 9, MITOCHONDRIAL (PTHR12655:SF0)	acyl-CoA metabolic process(GO:0006637);biological_process(GO:0008150)	Energy metabolism	F0ZFJ1	F0ZFJ1				Q9Y305	Q9Y305
Q54LR4	Proteomics	Uncharacterized protein	39S RIBOSOMAL PROTEIN L45, MITOCHONDRIAL (PTHR28554:SF1)		Ribo. & translation	F1A2C8	F1A2C8
Q54LT0	Proteomics	Calcium uniporter protein, mitochondrial (DdMCU)	CALCIUM UNIPORTER PROTEIN, MITOCHONDRIAL (PTHR13462:SF10)	ion transport(GO:0006811);calcium ion transport(GO:0006816);calcium import into the mitochondrion(GO:0036444);mitochondrial calcium ion homeostasis(GO:0051560);calcium ion transmembrane transport(GO:0070588)	Carriers & channels	F0ZTJ8	F0ZTJ8				Q8NE86	Q8NE86
Q54LV3	Proteomics	Elongation factor Ts, mitochondrial (EF-Ts) (EF-TsMt)	ELONGATION FACTOR TS, MITOCHONDRIAL (PTHR11741:SF0)	translation(GO:0006412);translational elongation(GO:0006414);mitochondrial translational elongation(GO:0070125)	Ribo. & translation	F0ZQL3	F0ZQL3	Q9ZE60			P43897	P43897
Q54LV4	Proteomics	Uncharacterized protein	TPR_REGION DOMAIN-CONTAINING PROTEIN (PTHR45641:SF13)			F0ZQL4	F0ZQL4					Q7Z494
Q54LW3	Proteomics	Uncharacterized protein DDB_G0286379	WH2 DOMAIN-CONTAINING PROTEIN (PTHR14215:SF0)			F0ZQK9	F0ZQK9
Q54M18	Proteomics	Bifunctional protein argC, mitochondrial [Includes: N-acetyl-gamma-glutamyl-phosphate reductase (EC 1.2.1.38) (N-acetyl-glutamate semialdehyde dehydrogenase) (NAGSA dehydrogenase); Acetylglutamate kinase (EC 2.7.2.8) (N-acetyl-L-glutamate 5-phosphotransferase) (NAG kinase) (AGK)]	N-ACETYLGLUTAMATE SYNTHASE, MITOCHONDRIAL (PTHR23342:SF0)	arginine biosynthetic process(GO:0006526);metabolic process(GO:0008152);cellular amino acid biosynthetic process(GO:0008652);phosphorylation(GO:0016310)	Amino acid metabolism	F0ZHV7	F0ZHV7	Q9ZDL2	Q01217	Q01217	Q8N159	Q8N159
Q54M22	Proteomics	2-oxoisovalerate dehydrogenase subunit alpha, mitochondrial (EC 1.2.4.4) (Branched-chain alpha-keto acid dehydrogenase E1 component alpha chain) (BCKDE1A) (BCKDH E1-alpha)	2-OXOISOVALERATE DEHYDROGENASE SUBUNIT ALPHA, MITOCHONDRIAL (PTHR43380:SF1)	branched-chain amino acid catabolic process(GO:0009083)	Amino acid metabolism	F0ZUJ1	F0ZUJ1	Q9ZDR4	P16387	P16387	P12694	P12694
Q54M25	Proteomics	Ponticulin-like protein B	Ponticulin family		Other regulation of gene expression	F0ZV83	F0ZV83
Q54M56	Proteomics	rRNA adenine N(6)-methyltransferase (EC 2.1.1.-)	DIMETHYLADENOSINE TRANSFERASE 1, MITOCHONDRIAL (PTHR11727:SF17)	rRNA modification(GO:0000154);DNA-templated transcription, initiation(GO:0006352);rRNA processing(GO:0006364);transcription initiation from mitochondrial promoter(GO:0006391);rRNA methylation(GO:0031167);methylation(GO:0032259)	Other regulation of gene expression	F0ZVM9	F0ZVM9	O05952	P41819		Q8WVM0	Q8WVM0
Q54M82	Proteomics	Probable cytochrome b-c1 complex subunit 7 (Ubiquinol-cytochrome c reductase complex subunit 7)	CYTOCHROME B-C1 COMPLEX SUBUNIT 7 (PTHR12022:SF0)	mitochondrial electron transport, ubiquinol to cytochrome c(GO:0006122);aerobic respiration(GO:0009060)	Respiratory chain subunits	F0ZAE2	F0ZAE2				P14927	P14927
Q54M86	Proteomics	Reactive oxygen species modulator 1 homolog (ROS modulator 1 homolog) (Protein MGR2 homolog)	REACTIVE OXYGEN SPECIES MODULATOR 1 (PTHR28525:SF1)	biological_process(GO:0008150);protein import into mitochondrial matrix(GO:0030150);protein insertion into mitochondrial inner membrane(GO:0045039)	Protein import & biogenesis	F4Q9Z8	F0ZAD8				P60602	P60602
Q54M99	Proteomics	Uncharacterized protein				F1A5S4	F1A5S4
Q54MI5	Proteomics	SMP-LTD domain-containing protein	SMP-LTD DOMAIN-CONTAINING PROTEIN (PTHR13466:SF7)	lipid transport(GO:0006869);mitochondrion-endoplasmic reticulum membrane tethering(GO:1990456)	Lipid metabolism	F0ZA57	F0ZA57		P41800	P41800
Q54MJ1	Proteomics	LIM zinc-binding domain-containing protein	LIM ZINC-BINDING DOMAIN-CONTAINING PROTEIN (PTHR31534:SF3)	biological_process(GO:0008150)		D3BI81	F1A446					O14639
Q54MJ5	Proteomics	Uncharacterized protein			Other	F0Z6B2	F0Z6B2		P25087			Q9H8H3
Q54MN5	Proteomics	Uncharacterized protein		regulation of mRNA stability(GO:0043488)	mRNA related processes	F0ZD57	F0ZD57
Q54MS4	Proteomics	Uncharacterized protein	ELM2 DOMAIN-CONTAINING PROTEIN (PTHR10865:SF28)	negative regulation of transcription by RNA polymerase II(GO:0000122);biological_process(GO:0008150);histone deacetylation(GO:0016575)	Other regulation of gene expression	F0ZQ68	F0ZQ68
Q54MU3	Proteomics	3'-5' exonuclease domain-containing protein	EXONUCLEASE 3'-5' DOMAIN-CONTAINING PROTEIN 2-RELATED (PTHR13620:SF96)	nucleobase-containing compound metabolic process(GO:0006139);nucleic acid phosphodiester bond hydrolysis(GO:0090305)	DNA related processes	A0A151ZBF7	F0ZQK3				Q9NVH0	Q9NVH0
Q54MV7	Proteomics	NADH dehydrogenase [ubiquinone] 1 alpha subcomplex subunit 12	NADH DEHYDROGENASE [UBIQUINONE] 1 ALPHA SUBCOMPLEX SUBUNIT 12 (PTHR12910:SF2)	response to oxidative stress(GO:0006979);mitochondrial respiratory chain complex I assembly(GO:0032981)	Respiratory chain assembly	F0ZRS5	F0ZRS5	Q9ZCK4			Q9UI09	Q9UI09
Q54MY0	Proteomics	J domain-containing protein	J DOMAIN-CONTAINING PROTEIN (PTHR24074:SF51)		Protein maturation & folding	F0ZFC1	F0ZFC1
Q54MY2	Proteomics	Uncharacterized protein	J DOMAIN-CONTAINING PROTEIN (PTHR24074:SF51)		Protein maturation & folding	F0ZFC1	F0ZFC1
Q54MZ4	Proteomics	Mitochondrial substrate carrier family protein B	MITOCHONDRIAL SUBSTRATE CARRIER FAMILY PROTEIN B (PTHR24089:SF724)	transmembrane transport(GO:0055085)	Carriers & channels	F0ZKE3	F0ZKE3		Q12251	Q12251	Q9BV35	Q9BV35
Q54MZ7	Proteomics	Nfu_N domain-containing protein	NFU1 IRON-SULFUR CLUSTER SCAFFOLD HOMOLOG, MITOCHONDRIAL (PTHR11178:SF1)	cellular iron ion homeostasis(GO:0006879);intracellular sequestering of iron ion(GO:0006880);iron-sulfur cluster assembly(GO:0016226);protein maturation by iron-sulfur cluster transfer(GO:0097428)	Fe/S protein biosynthesis	F4PT98	F0ZKE6	Q9ZCQ2	P32860	P32860	Q9UMS0	Q9UMS0
Q54MZ8	Proteomics	Probable methionine--tRNA ligase, mitochondrial (EC 6.1.1.10) (Mitochondrial methionyl-tRNA synthetase) (MtMetRS)	METHIONINE--TRNA LIGASE, MITOCHONDRIAL (PTHR43326:SF1)	translation(GO:0006412);tRNA aminoacylation for protein translation(GO:0006418);methionyl-tRNA aminoacylation(GO:0006431)	tRNA related processes	F0ZKE7	F0ZKE7	Q9ZCP0	P22438	P22438	Q96GW9	Q96GW9
Q54N01	Proteomics	Uncharacterized protein	PROTEIN LIFEGUARD 4 (PTHR23291:SF50)		Morphology & dynamics	F0ZXX3	F0ZXX3		P48558	P48558		P55061
Q54N05	Proteomics	RING-type domain-containing protein	E3 UBIQUITIN-PROTEIN LIGASE RNF123 (PTHR13363:SF5)	protein ubiquitination(GO:0016567);proteolysis involved in cellular protein catabolic process(GO:0051603)	Protein degradation	F0ZXX5	F0ZXX5		Q05580			Q5XPI4
Q54N07	Proteomics	TsaA-like domain-containing protein	TRNA (ADENINE(37)-N6)-METHYLTRANSFERASE (PTHR12818:SF0)	tRNA methylation(GO:0030488)	tRNA related processes	F0ZKF0	F0ZKF0					Q9BU70
Q54N28	Proteomics	Uncharacterized protein	MITOCHONDRIAL RNA PSEUDOURIDINE SYNTHASE RPUSD4 (PTHR21600:SF81)	enzyme-directed rRNA pseudouridine synthesis(GO:0000455);pseudouridine synthesis(GO:0001522);RNA modification(GO:0009451)	Ribo. & translation	F0ZT35	F0ZT35	Q9ZDR7	Q12069	P53294	Q96CM3	Q96CM3
Q54N47	Proteomics	Branched-chain-amino-acid aminotransferase (EC 2.6.1.42)	BRANCHED-CHAIN-AMINO-ACID AMINOTRANSFERASE (PTHR11825:SF44)	cellular amino acid biosynthetic process(GO:0008652);branched-chain amino acid metabolic process(GO:0009081);branched-chain amino acid biosynthetic process(GO:0009082)	Amino acid metabolism	F0ZA94	F0ZA94	O05970	P47176	P38891	O15382	O15382
Q54N53	Proteomics	Uncharacterized protein		biological_process(GO:0008150)		F0ZMW9	F0ZMW9
Q54N56	Proteomics	Uncharacterized protein				F0ZMX2	F0ZMX2
Q54N67	Proteomics	Uncharacterized protein	COILED-COIL DOMAIN-CONTAINING PROTEIN 58 (PTHR31905:SF2)			F0ZVZ8	F0ZVZ8
Q54N68	Proteomics	Glutaredoxin-like protein YDR286C homolog	GLUTAREDOXIN-LIKE PROTEIN C5ORF63 HOMOLOG (PTHR33558:SF1)		Other	F0ZVZ7	F0ZVZ7		Q05530	Q05530	A6NC05	A6NC05
Q54N93	Proteomics	Uncharacterized protein	T-CELL ACTIVATION INHIBITOR, MITOCHONDRIAL (PTHR31596:SF1)			F1A0J5	F1A0J5				Q8N3R3	Q8N3R3
Q54N98	Proteomics	Uncharacterized protein				F0ZLU8	F0ZLU8
Q54ND0	Proteomics	Uncharacterized transmembrane protein SSD449			Other	F0ZDA4	F0ZDA4					Q5TI25
Q54ND5	Proteomics	Multiple inositol polyphosphate phosphatase 1 (Ddmipp1) (EC 3.1.3.62) (2,3-bisphosphoglycerate 3-phosphatase) (2,3-BPG phosphatase) (EC 3.1.3.80) (Inositol (1,3,4,5)-tetrakisphosphate 3-phosphatase) (Ins(1,3,4,5)P(4) 3-phosphatase)	MULTIPLE INOSITOL POLYPHOSPHATE PHOSPHATASE 1 (PTHR20963:SF52)	glucose catabolic process(GO:0006007);response to lithium ion(GO:0010226);dephosphorylation(GO:0016311);inositol trisphosphate metabolic process(GO:0032957)	Energy metabolism	F0ZYV2	F0ZYV2		P00635			Q9UNW1
Q54NI6	Proteomics	NADH dehydrogenase [ubiquinone] iron-sulfur protein 7, mitochondrial	NADH DEHYDROGENASE [UBIQUINONE] IRON-SULFUR PROTEIN 7, MITOCHONDRIAL (PTHR11995:SF14)	aerobic respiration(GO:0009060);electron transport coupled proton transport(GO:0015990);electron transport chain(GO:0022900);mitochondrial respiratory chain complex I assembly(GO:0032981)	Respiratory chain subunits	A0A0W8DEY0	F0ZDB9	Q9ZDH2			O75251	O75251
Q54NM3	Proteomics	Uncharacterized protein	SUBFAMILY NOT NAMED (PTHR31630:SF9)	biological_process(GO:0008150)		F0ZGN2	F0ZGN2
Q54NM6	Proteomics	Molybdenum cofactor biosynthesis protein 1 [Includes: GTP 3',8-cyclase (EC 4.1.99.22) (Molybdenum cofactor biosynthesis protein A); Cyclic pyranopterin monophosphate synthase (EC 4.6.1.17) (Molybdenum cofactor biosynthesis protein C)]	MOLYBDENUM COFACTOR BIOSYNTHESIS PROTEIN 1 (PTHR22960:SF0)	Mo-molybdopterin cofactor biosynthetic process(GO:0006777)	Cofactor biosynthesis	D3B1M1	F0ZGM0				Q9NZB8	Q9NZB8
Q54NN6	Proteomics	F-box domain-containing protein	B BOX-TYPE DOMAIN-CONTAINING PROTEIN-RELATED (PTHR16148:SF19)	biological_process(GO:0008150)	Other regulation of gene expression	F0ZQX3	F0ZQX3
Q54NQ9	Proteomics	Sideroflexin	SIDEROFLEXIN-5 (PTHR11153:SF6)	ion transport(GO:0006811);amino acid transport(GO:0006865);ion transmembrane transport(GO:0034220);transmembrane transport(GO:0055085);mitochondrial transmembrane transport(GO:1990542)	Carriers & channels	F0ZG51	F0ZG51		Q12029	Q12029	Q8TD22	Q8TD22
Q54NR3	Proteomics	NADH dehydrogenase [ubiquinone] 1 beta subcomplex subunit 9	NADH DEHYDROGENASE [UBIQUINONE] 1 BETA SUBCOMPLEX SUBUNIT 9 (PTHR12868:SF0)	mitochondrial electron transport, NADH to ubiquinone(GO:0006120)	Respiratory chain subunits	F0ZL47	F0ZL47				Q9Y6M9	Q9Y6M9
Q54NS1	Proteomics	Putative transferase caf17 homolog, mitochondrial (EC 2.1.-.-)	TRANSFERASE CAF17, MITOCHONDRIAL-RELATED (PTHR22602:SF0)	iron-sulfur cluster assembly(GO:0016226)	Fe/S protein biosynthesis	F0ZH12	F0ZH12	Q9ZD79	P47158	P47158	Q5T440	Q5T440
Q54NS5	Proteomics	Rhodanese domain-containing protein			Other	F0ZX76	F0ZX76
Q54NS9	Proteomics	Apoptosis-inducing factor homolog A (EC 1.-.-.-)	FERROPTOSIS SUPPRESSOR PROTEIN 1 (PTHR43735:SF3)	biological_process(GO:0008150);respiratory electron transport chain(GO:0022904)	Energy metabolism	F0ZZN4	F0ZZN4		P52923	P52923	Q9BRQ8	Q9BRQ8
Q54NV4	Proteomics	Uncharacterized protein	FIBRONECTIN TYPE-II DOMAIN-CONTAINING PROTEIN (PTHR11102:SF147)	protein ubiquitination(GO:0016567);ubiquitin-dependent ERAD pathway(GO:0030433)	Protein degradation	A0A397HNU7	F0ZX83		P34226		Q14154	Q5TEA6
Q54NV9	Proteomics	AMP-binding domain-containing protein	MEDIUM-CHAIN ACYL-COA LIGASE ACSF2, MITOCHONDRIAL (PTHR43201:SF9)	fatty acid metabolic process(GO:0006631);response to mercury ion(GO:0046689)	Lipid metabolism	F0ZX81	F0ZX81				Q96CM8	Q96CM8
Q54NW1	Proteomics	OPA3-like protein	OPTIC ATROPHY 3 PROTEIN (PTHR12499:SF0)	biological_process(GO:0008150);regulation of lipid metabolic process(GO:0019216)	Lipid metabolism	F0ZX79	F0ZX79				Q9H6K4	Q9H6K4
Q54NW9	Proteomics	Cytochrome b-c1 complex subunit Rieske, mitochondrial (EC 7.1.1.8) (Fragment)	CYTOCHROME B-C1 COMPLEX SUBUNIT RIESKE, MITOCHONDRIAL-RELATED (PTHR10134:SF20)	mitochondrial electron transport, ubiquinol to cytochrome c(GO:0006122)	Respiratory chain subunits	F0ZXZ9	F0ZXZ9	Q9ZDQ5	P08067	P08067	P47985	P47985
Q54NZ0	Proteomics	Mitochondrial import inner membrane translocase subunit Tim10	MITOCHONDRIAL IMPORT INNER MEMBRANE TRANSLOCASE SUBUNIT TIM10 (PTHR11038:SF16)	protein transport(GO:0015031);protein insertion into mitochondrial inner membrane(GO:0045039)	Protein import & biogenesis	F0ZH01	F0ZH01		P87108	P87108	P62072	P62072
Q54P00	Proteomics	Probable serine/threonine-protein kinase abkD (EC 2.7.11.-)	ABC1 DOMAIN-CONTAINING PROTEIN (PTHR43173:SF28)	protein phosphorylation(GO:0006468);mitochondrion organization(GO:0007005);phosphorylation(GO:0016310);lipid homeostasis(GO:0055088);altruistic, chimeric sorocarp development(GO:0099138)	Regulation & signaling	A0A152A650	F0ZCW3	Q9ZCP5	Q06567	Q06567	Q3MIX3	Q3MIX3
Q54P11	Proteomics	Uncharacterized protein	MITOCHONDRIAL INNER MEMBRANE PROTEIN OXA1L (PTHR12428:SF34)	protein insertion into mitochondrial inner membrane from matrix(GO:0032979);mitochondrial cytochrome c oxidase assembly(GO:0033617);protein insertion into membrane(GO:0051205)	Respiratory chain assembly	F0ZIX7	F0ZIX7		P39952	P39952	Q15070	Q15070
Q54P38	Proteomics	Putative uncharacterized protein DDB_G0284813				F0ZZ01	F0ZZ01
Q54P39	Proteomics	Uncharacterized protein				F0ZZ00	F0ZZ00
Q54P40	Proteomics	Iron-sulfur cluster assembly 2 homolog, mitochondrial (Iron-sulfur assembly protein isca2)	IRON-SULFUR CLUSTER ASSEMBLY 2 HOMOLOG, MITOCHONDRIAL (PTHR43011:SF1)	biological_process(GO:0008150);iron-sulfur cluster assembly(GO:0016226);protein maturation by [4Fe-4S] cluster transfer(GO:0106035)	Fe/S protein biosynthesis	F0ZYZ9	F0ZYZ9	Q9ZE83	Q07821	Q07821	Q86U28	Q86U28
Q54P46	Proteomics	NADH dehydrogenase [ubiquinone] 1 alpha subcomplex subunit 8	NADH DEHYDROGENASE [UBIQUINONE] 1 ALPHA SUBCOMPLEX SUBUNIT 8 (PTHR13344:SF0)	mitochondrial electron transport, NADH to ubiquinone(GO:0006120);negative regulation of transcription, DNA-templated(GO:0045892)	Respiratory chain subunits	A0A152A2D8	F0Z8N5				P51970	P51970
Q54P71	Proteomics	Probable acid phosphatase DDB_G0284755 (EC 3.1.3.2)	ACID PHOSPHATASE DDB_G0284753-RELATED (PTHR11567:SF197)	dephosphorylation(GO:0016311)	Regulation & signaling	F1A3V3	F1A3V3				Q9NPH0	P11117
Q54P88	Proteomics	Uncharacterized protein		biological_process(GO:0008150)	Other	F0ZLU6	F0ZLU6
Q54P95	Proteomics	Probable cytochrome c oxidase subunit 6B	CYTOCHROME C OXIDASE SUBUNIT (PTHR11387:SF2)	oxidative phosphorylation(GO:0006119)	Respiratory chain subunits	F0Z8L6	F0Z8L6		Q01519	Q01519	P14854	P14854
Q54P99	Proteomics	Phospholipase D	PHOSPHOLIPASE D (PTHR21248:SF22)		Lipid metabolism	F0Z8J7	F0Z8J7	Q9ZCD8
Q54PI8	Proteomics	Uncharacterized protein				F0ZD28	F0ZD28
Q54PL9	Proteomics	Uncharacterized protein		biological_process(GO:0008150)	Other	A0A2N1FB45
Q54PM3	Proteomics	Uncharacterized protein				F0ZDK8	F0ZDK8
Q54PP3	Proteomics	Ribosomal_L18e/L15P domain-containing protein	39S RIBOSOMAL PROTEIN L15, MITOCHONDRIAL (PTHR12934:SF11)	translation(GO:0006412)	Ribo. & translation	F1A478	F1A478	Q9ZCS4	P36520	P36520	Q9P015	Q9P015
Q54PT4	Proteomics	Uncharacterized protein	12S RRNA N4-METHYLCYTIDINE METHYLTRANSFERASE (PTHR11265:SF0)	methylation(GO:0032259);rRNA base methylation(GO:0070475)	Ribo. & translation	F0ZDL8	F0ZDL8	Q9ZCY2			A6NJ78	A6NJ78
Q54PX1	Proteomics	AAA ATPase domain-containing protein	AAA DOMAIN-CONTAINING PROTEIN (PTHR43655:SF2)	proteolysis(GO:0006508);mitochondrial fusion(GO:0008053);mitochondrial protein processing(GO:0034982);cristae formation(GO:0042407);protein-containing complex assembly(GO:0065003)	Protein degradation	A0A3Q7INF5	F0ZXE1	Q9ZEA2	P40341	P40341	Q9Y4W6	Q9Y4W6
Q54PY7	Proteomics	Probable mitochondrial 2-oxoglutarate/malate carrier protein (OGCP) (Mitochondrial substrate carrier family protein ucpC) (Solute carrier family 25 member 11 homolog)	MITOCHONDRIAL DICARBOXYLATE CARRIER (PTHR45618:SF13)	dicarboxylic acid transport(GO:0006835);sulfate transport(GO:0008272);thiosulfate transport(GO:0015709);oxaloacetate transport(GO:0015729);phosphate ion transmembrane transport(GO:0035435);transmembrane transport(GO:0055085);succinate transmembrane transport(GO:0071422);malate transmembrane transport(GO:0071423);oxaloacetate(2-) transmembrane transport(GO:1902356);sulfate transmembrane transport(…	Carriers & channels	A0A1B0B6P8	F1A4R1		Q06143	Q06143	Q02978	Q02978
Q54Q31	Proteomics	Prohibitin-2	PROHIBITIN-2 (PTHR23222:SF1)	mitophagy(GO:0000423);mitochondrion organization(GO:0007005)	Morphology & dynamics	F1A4N8	F1A4N8	Q9ZE25	P50085	P50085	Q99623	Q99623
Q54Q54	Proteomics	Uncharacterized protein	BRCT DOMAIN-CONTAINING PROTEIN-RELATED (PTHR23353:SF16)		Regulation & signaling	F1A3N8	F0ZQV3
Q54Q74	Proteomics	HpcH_HpaI domain-containing protein	HPCH_HPAI DOMAIN-CONTAINING PROTEIN (PTHR32308:SF0)	oxaloacetate metabolic process(GO:0006107)	Energy metabolism	F0ZIT0	F0ZIT0				Q8N0X4	Q8N0X4
Q54QA4	Proteomics	Uncharacterized protein	PROTEIN DEK (PTHR13468:SF1)	chromatin organization(GO:0006325);regulation of double-strand break repair(GO:2000779)	DNA related processes	F0ZBN3	F0ZBN3
Q54QC1	Proteomics	Probable glycerol-3-phosphate dehydrogenase, mitochondrial (GPD-M) (GPDH-M) (EC 1.1.5.3)	GLYCEROL-3-PHOSPHATE DEHYDROGENASE, MITOCHONDRIAL (PTHR11985:SF15)	glycerol-3-phosphate metabolic process(GO:0006072);glycerol catabolic process(GO:0019563)	Energy metabolism	A0A103Y9I7			P32191	P32191	P43304	P43304
Q54QC2	Proteomics	Uncharacterized protein	RIBOSOMAL RNA SMALL SUBUNIT METHYLTRANSFERASE J (PTHR36112:SF1)	rRNA methylation(GO:0031167)	Ribo. & translation	D3B8W4	F0ZJQ9
Q54QE2	Proteomics	Sulf_transp domain-containing protein	SULF_TRANSP DOMAIN-CONTAINING PROTEIN (PTHR30574:SF1)		Other	F0ZBP0	F0ZBP0
Q54QF9	Proteomics	GrpE protein homolog, mitochondrial (dRoe1)	GRPE PROTEIN HOMOLOG, MITOCHONDRIAL (PTHR21237:SF23)	protein folding(GO:0006457);protein import into mitochondrial matrix(GO:0030150);regulation of catalytic activity(GO:0050790)	Protein maturation & folding	F4PJ11	F1A4M2	Q9ZCT4	P38523	P38523	Q9HAV7	Q9HAV7
Q54QG2	Proteomics	Uncharacterized protein	CYCLOPROPANE-FATTY-ACYL-PHOSPHOLIPID SYNTHASE (PTHR43667:SF1)	lipid biosynthetic process(GO:0008610)	Lipid metabolism	F0ZNX0	F0ZNX0	O05972	P27680	P27680		Q5JPI9
Q54QG4	Proteomics	Uncharacterized protein DDB_G0283843			Other	F0ZNX2	F0ZNX2
Q54QH6	Proteomics	Uncharacterized protein	39S RIBOSOMAL PROTEIN L47, MITOCHONDRIAL (PTHR21183:SF18)	translation(GO:0006412);mitochondrial translation(GO:0032543)	Ribo. & translation	D3BHI4	F0ZNF9		P36517	P36517	Q9HD33	Q9HD33
Q54QH7	Proteomics	Uncharacterized protein	NADH DEHYDROGENASE [UBIQUINONE] 1 BETA SUBCOMPLEX SUBUNIT 8, MITOCHONDRIAL (PTHR12840:SF1)	biological_process(GO:0008150);electron transport chain(GO:0022900)	Respiratory chain subunits	F0ZNG0	F0ZNG0
Q54QI7	Proteomics	Hydroxymethylglutaryl-CoA lyase (EC 4.1.3.4)	PYRUVATE CARBOXYLTRANSFERASE DOMAIN-CONTAINING PROTEIN (PTHR42738:SF7)	leucine catabolic process(GO:0006552);lipid metabolic process(GO:0006629);ketone body biosynthetic process(GO:0046951)	Amino acid metabolism	F0ZNV7	F0ZNV7		Q12122		P35914	Q8TB92
Q54QJ9	Proteomics	Adenylate kinase (EC 2.7.4.3) (ATP-AMP transphosphorylase) (ATP:AMP phosphotransferase) (Adenylate kinase A) (Adenylate kinase cytosolic and mitochondrial) (Adenylate monophosphate kinase)	ADENYLATE KINASE 2, MITOCHONDRIAL (PTHR23359:SF234)	nucleobase-containing compound metabolic process(GO:0006139);purine ribonucleoside salvage(GO:0006166);ADP biosynthetic process(GO:0006172);phosphorylation(GO:0016310);AMP metabolic process(GO:0046033);ATP metabolic process(GO:0046034);nucleoside monophosphate phosphorylation(GO:0046940)	Regulation & signaling	A0A2K3E6L7	F0ZR41	Q9ZCS6	P07170	P07170	P54819	P54819
Q54QM0	Proteomics	Mitochondrial import inner membrane translocase subunit tim22	MITOCHONDRIAL IMPORT INNER MEMBRANE TRANSLOCASE SUBUNIT TIM22 (PTHR14110:SF0)	protein transport(GO:0015031);protein insertion into mitochondrial inner membrane(GO:0045039);protein transmembrane transport(GO:0071806)	Protein import & biogenesis	F0ZNV9	F0ZNV9		Q12328	Q12328	Q9Y584	Q9Y584
Q54QM2	Proteomics	RIBOSOMAL_L9 domain-containing protein	39S RIBOSOMAL PROTEIN L9, MITOCHONDRIAL (PTHR21368:SF18)	translation(GO:0006412)	Ribo. & translation	F0ZSY4	F0ZSY4	Q9ZEA4			Q9BYD2	Q9BYD2
Q54QN1	Proteomics	Mitochondrial import inner membrane translocase subunit TIM14 (DnaJ homolog subfamily C member 19)	MITOCHONDRIAL IMPORT INNER MEMBRANE TRANSLOCASE SUBUNIT TIM14 (PTHR12763:SF28)	biological_process(GO:0008150);protein transport(GO:0015031);protein import into mitochondrial matrix(GO:0030150);positive regulation of ATPase activity(GO:0032781);regulation of cardiolipin metabolic process(GO:1900208)	Protein import & biogenesis	F0ZXI2	F0ZXI2		Q07914	Q07914	Q96DA6	Q96DA6
Q54QN2	Proteomics	Mitochondrial substrate carrier family protein M (Solute carrier family 25 member 32 homolog)	MITOCHONDRIAL FOLATE TRANSPORTER/CARRIER (PTHR45683:SF3)	folic acid transport(GO:0015884);FAD transmembrane transport(GO:0035350)	Carriers & channels	A0A151ZDP6	F0ZKB3		P40556	P40556	Q9H2D1	Q9H2D1
Q54QN4	Proteomics	Uncharacterized transmembrane protein DDB_G0283731			Other	F1A1Y8	F1A1Y8
Q54QP9	Proteomics	Uncharacterized protein				A0A152A5C2
Q54QR8	Proteomics	Probable cytochrome b-c1 complex subunit 9 (Ubiquinol-cytochrome c reductase complex subunit 9)	CYTOCHROME B-C1 COMPLEX SUBUNIT 9 (PTHR12980:SF0)	mitochondrial electron transport, ubiquinol to cytochrome c(GO:0006122);aerobic respiration(GO:0009060)	Respiratory chain assembly	F0ZSC3	F0ZSC3		P22289	P22289	Q9UDW1	Q9UDW1
Q54QV8	Proteomics	Uncharacterized transmembrane protein DDB_G0283573		protein insertion into mitochondrial outer membrane [GO:0045040]	Protein import & biogenesis	F0ZNF6	F0ZNF6
Q54R43	Proteomics	PH domain-containing protein		actin cytoskeleton reorganization(GO:0031532)	Morphology & dynamics	F0ZRI9	F0ZRI9					P08567
Q54R47	Proteomics	Glutaryl-CoA dehydrogenase, mitochondrial (GCD) (EC 1.3.8.6)	GLUTARYL-COA DEHYDROGENASE, MITOCHONDRIAL (PTHR42807:SF1)	tryptophan metabolic process(GO:0006568);fatty acid beta-oxidation using acyl-CoA dehydrogenase(GO:0033539);fatty-acyl-CoA biosynthetic process(GO:0046949)	Energy metabolism	F0ZHV1	F0ZHV1				Q92947	Q92947
Q54R89	Proteomics	Uncharacterized protein		biological_process(GO:0008150)	Other	F0ZH65	F0ZH65
Q54RA8	Proteomics	ATP synthase subunit O, mitochondrial (ATP synthase peripheral stalk subunit OSCP) (Oligomycin sensitivity conferral protein) (OSCP)	ATP SYNTHASE SUBUNIT O, MITOCHONDRIAL (PTHR11910:SF1)	ATP biosynthetic process(GO:0006754);ion transport(GO:0006811);ATP synthesis coupled proton transport(GO:0015986);mitochondrial ATP synthesis coupled proton transport(GO:0042776)	Respiratory chain subunits	F0ZKW7	F0ZKW7				P48047	P48047
Q54RB5	Proteomics	Uncharacterized protein	39S RIBOSOMAL PROTEIN L4, MITOCHONDRIAL (PTHR10746:SF6)	translation(GO:0006412)	Ribo. & translation	F0ZF24	F0ZF24	Q9ZCQ6	P51998	P51998	Q9BYD3	Q9BYD3
Q54RB6	Proteomics	L51_S25_CI-B8 domain-containing protein	39S RIBOSOMAL PROTEIN L43, MITOCHONDRIAL (PTHR21396:SF2)	mitochondrial translation(GO:0032543)	Ribo. & translation	F0ZF23	F0ZF23		Q06090	Q06090	Q8N983	Q8N983
Q54RB8	Proteomics	Uncharacterized protein	CYTOCHROME B561 DOMAIN-CONTAINING PROTEIN (PTHR15422:SF24)	biological_process(GO:0008150)	Other	F0ZF28	F0ZF28
Q54RB9	Proteomics	Calcium-binding mitochondrial carrier protein (Mitochondrial substrate carrier family protein O)	CALCIUM-BINDING MITOCHONDRIAL CARRIER PROTEIN ARALAR1 (PTHR45678:SF9)	transport(GO:0006810);aspartate transmembrane transport(GO:0015810);L-glutamate transmembrane transport(GO:0015813);malate-aspartate shuttle(GO:0043490);transmembrane transport(GO:0055085);L-aspartate transmembrane transport(GO:0070778)	Carriers & channels	F0ZF27	F0ZF27		Q12482	Q12482	O75746	O75746
Q54RE7	Proteomics	RF_PROK_I domain-containing protein	RF_PROK_I DOMAIN-CONTAINING PROTEIN (PTHR43804:SF7)	translation(GO:0006412);translational termination(GO:0006415);mitochondrial translational termination(GO:0070126)	Ribo. & translation	A0A151Z2X2	F0ZPY1	Q9ZD21	P30775	P30775	Q9UGC7	Q9UGC7
Q54RE9	Proteomics	Uncharacterized protein	OS04G0165500 PROTEIN (PTHR36070:SF1)		Other	F0ZPY3	F0ZPY3
Q54RP1	Proteomics	Uncharacterized protein	MITOCHONDRIAL INNER MEMBRANE PROTEASE SUBUNIT 1 (PTHR12383:SF16)	proteolysis(GO:0006508);protein processing involved in protein targeting to mitochondrion(GO:0006627)	Protein import & biogenesis	F0ZKT5	F0ZKT5		P28627	P28627	Q96LU5	Q96LU5
Q54RP2	Proteomics	Iron-sulfur cluster assembly protein	NIFU_N DOMAIN-CONTAINING PROTEIN (PTHR10093:SF8)	cellular iron ion homeostasis(GO:0006879);iron-sulfur cluster assembly(GO:0016226)	Cellular response to stress	F0ZKT4	F0ZKT4	Q9ZD61	Q03020	Q03020	Q9H1K1	Q9H1K1
Q54RR5	Proteomics	Probable short/branched chain specific acyl-CoA dehydrogenase (SBCAD) (EC 1.3.8.5)	SHORT/BRANCHED CHAIN SPECIFIC ACYL-COA DEHYDROGENASE, MITOCHONDRIAL (PTHR43884:SF1)	isoleucine catabolic process(GO:0006550);lipid metabolic process(GO:0006629);fatty acid metabolic process(GO:0006631)	Lipid metabolism	A0A1J1HS41	F0Z7G3		P13711		P45954	P45954
Q54RR6	Proteomics	tRNA pseudouridine synthase (EC 5.4.99.12)	TRNA PSEUDOURIDINE SYNTHASE-LIKE 1 (PTHR11142:SF0)	pseudouridine synthesis(GO:0001522);tRNA processing(GO:0008033);RNA modification(GO:0009451);tRNA pseudouridine synthesis(GO:0031119)	tRNA related processes	F0Z7G4	F0Z7G4	Q9ZCA3	P31115	P31115	Q8N0Z8	Q8N0Z8
Q54RS0	Proteomics	PseudoU_synth_2 domain-containing protein	PSEUDOU_SYNTH_2 DOMAIN-CONTAINING PROTEIN (PTHR21600:SF19)	pseudouridine synthesis(GO:0001522);RNA modification(GO:0009451)	Other regulation of gene expression	F0ZY78	F0ZY78	Q9ZD06
Q54RS2	Proteomics	Uncharacterized protein DDB_G0282957			Other	F0Z7E4	F0Z7E4
Q54RS6	Proteomics	Uncharacterized protein DDB_G0282951				A0A151ZHP8	F0ZH41
Q54RT6	Proteomics	Putative uncharacterized protein DDB_G0282937	CHROMOSOME 16, WHOLE GENOME SHOTGUN SEQUENCE (PTHR28075:SF1)	biological_process(GO:0008150)		F4PN00	F0ZKT8
Q54RV9	Proteomics	Sphingosine-1-phosphate lyase (S1P lyase) (S1PL) (SP-lyase) (SPL) (EC 4.1.2.27) (Sphingosine-1-phosphate aldolase)	SPHINGOSINE-1-PHOSPHATE LYASE 1 (PTHR42735:SF6)	ameboidal-type cell migration(GO:0001667);lipid metabolic process(GO:0006629);sphingolipid metabolic process(GO:0006665);ceramide metabolic process(GO:0006672);cellular calcium ion homeostasis(GO:0006874);chemotaxis(GO:0006935);cell death(GO:0008219);carboxylic acid metabolic process(GO:0019752);actin cytoskeleton organization(GO:0030036);sphingolipid catabolic process(GO:0030149);sporulation res…	Development	F0Z9G5	F0Z9G5	Q9ZD60	Q05567	P25374	Q9Y697	O95470
Q54RW4	Proteomics	Uncharacterized protein
Q54RZ5	Proteomics	Translocase of outer mitochondrial membrane		protein transport(GO:0015031);protein import into mitochondrial matrix(GO:0030150);protein insertion into mitochondrial outer membrane(GO:0045040)	Protein import & biogenesis
Q54S35	Proteomics	Uncharacterized protein	MAU2 CHROMATID COHESION FACTOR HOMOLOG (PTHR21394:SF0)	chromosome segregation(GO:0007059);mitotic sister chromatid cohesion(GO:0007064);maintenance of mitotic sister chromatid cohesion(GO:0034088)	DNA related processes	A0A151Z6I4	F1A5R9
Q54S63	Proteomics	Small GTPase	RAB GTPASE-RELATED (PTHR47977:SF40)		Regulation & signaling	A0A445BNK4	F0ZVR1		P01123			P62820
Q54S83	Proteomics	Protein arginine methyltransferase NDUFAF7 homolog, mitochondrial (EC 2.1.1.320) (Mitochondrial dysfunction gene A) (NADH dehydrogenase [ubiquinone] complex I, assembly factor 7 homolog)	PROTEIN ARGININE METHYLTRANSFERASE NDUFAF7, MITOCHONDRIAL (PTHR12049:SF7)	glycogen metabolic process(GO:0005977);glutamate metabolic process(GO:0006536);pinocytosis(GO:0006907);phagocytosis(GO:0006909);negative regulation of autophagy(GO:0010507);peptidyl-arginine methylation, to symmetrical-dimethyl arginine(GO:0019918);sporulation resulting in formation of a cellular spore(GO:0030435);culmination involved in sorocarp development(GO:0031154);methylation(GO:0032259);mi…	Respiratory chain assembly	F1A6C4	F1A6C4	Q9ZEA0			Q7L592	Q7L592
Q54SE2	Proteomics	1-Cys peroxiredoxin (EC 1.11.1.24) (Thiol-specific antioxidant) (Thioredoxin peroxidase) (Thioredoxin-dependent peroxiredoxin)	PEROXIREDOXIN-6 (PTHR43503:SF4)	biological_process(GO:0008150);cell redox homeostasis(GO:0045454);cellular oxidant detoxification(GO:0098869)	Cellular response to stress	F0ZN68	F0ZN68	Q9ZDK1	P34227	P34227	P30041	P30041
Q54SG2	Proteomics	Uncharacterized protein				F0ZT86	F0ZT86
Q54SI3	Proteomics	Uncharacterized protein			Other	F4Q638	F0ZLF5
Q54SI4	Proteomics	Uncharacterized protein				A0A151ZAQ0
Q54SI5	Proteomics	Uncharacterized protein			Other	A0A151ZAQ0
Q54SL9	Proteomics	Uncharacterized protein				A0A152A0Y5					Q9HD34	Q9HD34
Q54SM0	Proteomics	3'-5' exonuclease domain-containing protein	PIRNA BIOGENESIS PROTEIN EXD1 (PTHR46628:SF1)	nucleobase-containing compound metabolic process(GO:0006139);biological_process(GO:0008150);nucleic acid phosphodiester bond hydrolysis(GO:0090305)	Other regulation of gene expression	F1A260	F1A260	Q9ZD81			Q9NVH0	Q8NHP7
Q54SV6	Proteomics	Mitochondrial import inner membrane translocase subunit tim16 (Presequence translocated-associated motor subunit pam16)	MITOCHONDRIAL IMPORT INNER MEMBRANE TRANSLOCASE SUBUNIT TIM16 (PTHR12388:SF0)	protein transport(GO:0015031);protein import into mitochondrial matrix(GO:0030150)	Protein import & biogenesis	F1A1C6	F1A1C6		P42949	P42949	Q9Y3D7	Q9Y3D7
Q54SX4	Proteomics	Uncharacterized protein				F0ZX94	F0ZX94
Q54T03	Proteomics	Uncharacterized protein	MITOCHONDRIAL TRANSLATION SYSTEM COMPONENT PET127-RELATED (PTHR31014:SF0)	mitochondrial RNA metabolic process(GO:0000959);mitochondrial RNA 5'-end processing(GO:0000964)	Other regulation of gene expression	F0ZXE8	F0ZXE8		P32606	P32606
Q54T08	Proteomics	Uncharacterized protein				F0ZYE0	F0ZYE0
Q54T46	Proteomics	Xaa-Pro aminopeptidase 3 (X-Pro aminopeptidase 3) (EC 3.4.11.9) (Aminopeptidase P3) (APP3)	XAA-PRO AMINOPEPTIDASE 3 (PTHR43226:SF4)	proteolysis(GO:0006508)	Protein degradation	F0Z725	F0Z725	Q9ZD64	P40051	P40051	Q9NQH7	Q9NQH7
Q54T96	Proteomics	Uncharacterized protein	CHITIN-BINDING TYPE-2 DOMAIN-CONTAINING PROTEIN (PTHR22933:SF31)	biological_process(GO:0008150)	Other	F0ZS11	F1A598					Q09472
Q54TD4	Proteomics	Uncharacterized protein				F0ZYL2	F0ZYL2
Q54TR2	Proteomics	Cytochrome c domain-containing protein	GENETIC INTERACTOR OF PROHIBITINS 3, MITOCHONDRIAL (PTHR46434:SF1)	electron transport chain(GO:0022900)	Respiratory chain assembly	F0ZCW0	F0ZCW0				Q8NC60	Q8NC60
Q54TR5	Proteomics	Probable serine/threonine-protein kinase abkB (EC 2.7.11.-)	ABC1 DOMAIN-CONTAINING PROTEIN (PTHR43173:SF28)	protein phosphorylation(GO:0006468);mitochondrion organization(GO:0007005);biological_process(GO:0008150);phosphorylation(GO:0016310);lipid homeostasis(GO:0055088)	Regulation & signaling	F0ZCW3	F0ZCW3	Q9ZCP5	Q06567	Q06567	Q86TW2	Q86TW2
Q54TT7	Proteomics	Uncharacterized protein	AT19154P (PTHR12151:SF5)	mitochondrial cytochrome c oxidase assembly(GO:0033617)	Respiratory chain assembly	F1A599	F1A599	Q9ZCW7	P38072	P38072	O75880	O75880
Q54TY5	Proteomics	Probable 39S ribosomal protein L17, mitochondrial (L17mt) (MRP-L17)	39S RIBOSOMAL PROTEIN L17, MITOCHONDRIAL (PTHR14413:SF16)	translation(GO:0006412)	Ribo. & translation	F0ZH79	F0ZH79	Q9ZCT0	P22353	P22353	Q9NRX2	Q9NRX2
Q54U34	Proteomics	Uncharacterized protein			Other	F4PH87
Q54U47	Proteomics	Uncharacterized protein				F0ZLC7	F0ZLC7
Q54U71	Proteomics	4-hydroxybenzoate polyprenyltransferase, mitochondrial (4-HB polyprenyltransferase) (EC 2.5.1.39) (Para-hydroxybenzoate--polyprenyltransferase) (PHB:PPT) (PHB:polyprenyltransferase)	4-HYDROXYBENZOATE POLYPRENYLTRANSFERASE, MITOCHONDRIAL (PTHR11048:SF28)	ubiquinone biosynthetic process(GO:0006744);isoprenoid biosynthetic process(GO:0008299)	Other	A0A087SPF5		Q9ZCN7	P32378	P32378	Q96H96	Q96H96
Q54UB7	Proteomics	Uncharacterized protein	SUBFAMILY NOT NAMED (PTHR12428:SF39)	protein insertion into mitochondrial inner membrane from matrix(GO:0032979);mitochondrial cytochrome c oxidase assembly(GO:0033617);protein insertion into membrane(GO:0051205)	Respiratory chain assembly	F0ZYX3	F0ZYX3		P39952	P39952	Q15070	Q15070
Q54UC6	Proteomics	Uncharacterized protein	TRANSCRIPTION FACTOR TFIIIB COMPONENT B'' HOMOLOG (PTHR22929:SF0)		mRNA related processes	F0ZIA4	F0ZIA4
Q54UH1	Proteomics	Uncharacterized protein	DO-LIKE 15 PROTEIN-RELATED (PTHR45980:SF9)	proteolysis(GO:0006508)	Protein degradation	F0ZN09	F0ZN09	O05942			O43464	P83110
Q54UK1	Proteomics	Uncharacterized protein	HOMEOBOX PROTEIN 13-RELATED (PTHR20916:SF12)			F1A3Q5	F1A3Q5
Q54UK2	Proteomics	Uncharacterized protein	TRANSMEMBRANE PROTEIN (PTHR34286:SF1)		Other	F1A3Q6	F1A3Q6
Q54UP1	Proteomics	Uncharacterized protein	GENERAL TRANSCRIPTION AND DNA REPAIR FACTOR IIH HELICASE SUBUNIT XPB (PTHR11274:SF0)	transcription initiation from RNA polymerase II promoter(GO:0006367);response to UV(GO:0009411);DNA duplex unwinding(GO:0032508);nucleotide-excision repair, DNA incision(GO:0033683)	DNA related processes	A0A151ZB47	F0ZBG8		Q06683	Q06683
Q54UP6	Proteomics	Putative uncharacterized protein DDB_G0280905				F0ZEY8	F0ZEY8
[truncated: 557 more rows]

## Sheet: Table S7
Table S7. All Ribosome proteins in the mitochondrial protein compendium. List of all mitochondrial proteins with ribosomal protein classifications according to their annaotation and/or PANTHER family classification.
Dicty Uniprot ID	Protein name	Family (PANTHER)	Gene name
[truncated: 51 more rows]

## Sheet: Table S8
Table S8. Scaled RNAseq data. The normalized expression profiles for genes encoding mitochondrial proteins (Parikh et al., 2010; Stajdohar et al., 2017) scaled to a mean of 0 and standard deviation of 1. Groups: biological process categories; t0-24: timepoints in hours within the 24-hour starvation-induced development cycle. Upregulated genes (log2 fold-change ≥ 1) at specific timepoints are indi…
[truncated: 1,076 more rows]

[truncated: 1 more sheets: Table S9]
